# Supplementary material for: Photoredox-catalyzed stereoselective alkylation of enamides with N-hydroxyphthalimide esters via decarboxylative cross-coupling reactions
Source: Royal Society of Chemistry journal article supplement (doi:10.1039/c9sc03070k), 2019-01-01

# Photoredox-Catalyzed Stereoselective Alkylation of Enamides with *N*-Hydroxyphthalimide Esters *via* Decarboxylative Cross-Coupling Reactions

Jing-Yu Guo,<sup>†</sup> Ze-Yu Zhang,<sup>†</sup> Ting Guan,<sup>†</sup> Lei-Wen Mao,<sup>†</sup> Qian Ban,<sup>†</sup> Kai Zhao<sup>\*†</sup> and  
Teck-Peng Loh<sup>\*†,‡</sup>

<sup>†</sup>Institute of Advanced Synthesis, School of Chemistry and Molecular Engineering,  
Jiangsu National Synergetic Innovation Center for Advanced Materials, Nanjing Tech  
University, Nanjing 211816, China.

<sup>‡</sup>Division of Chemistry and Biological Chemistry, School of Physical and  
Mathematical Sciences, Nanyang Technological University, Singapore 637371,  
Singapore.

E-mail: ias\_kzhao@njtech.edu.cn; teckpeng@ntu.edu.sg

## Table of Contents

|                                                                                          |      |
|------------------------------------------------------------------------------------------|------|
| General Information.....                                                                 | S-2  |
| General Procedure for the Alkylation of Enamides. ....                                   | S-2  |
| Analytical Data for the Alkylated Enamides .....                                         | S-3  |
| Synthetic Applications of Alkylated Enamides.....                                        | S-18 |
| (1) Gram-scale synthesis of alkylated enamides.....                                      | S-18 |
| (2) Conversion of configuration of enamides.....                                         | S-19 |
| (3) Preparation of isoquinoline derivative <b>7</b> .....                                | S-20 |
| (4) Hydrogenation of enamide <b>3aa</b> .....                                            | S-22 |
| (5) Hydrolysis of enamides.....                                                          | S-22 |
| (6) The synthesis of $\alpha$ -acyloxyketone.....                                        | S-24 |
| (7) Cleavage of <i>N</i> -Boc protecting Group.....                                      | S-25 |
| Preliminary Mechanistic Studies .....                                                    | S-26 |
| (1) Radical-trapping experiments.....                                                    | S-26 |
| (2) Quantum yield measurement.....                                                       | S-27 |
| (3) <sup>1</sup> H NMR evidence for the stereoselectivity of the model reaction.....     | S-29 |
| Determination of stereochemistry-NOESY experiment of <b>E-3aa</b> and <b>Z-3aa</b> ..... | S-30 |
| References.....                                                                          | S-32 |
| Copies of <sup>1</sup> H NMR, <sup>13</sup> C NMR, and <sup>19</sup> F NMR Spectra.....  | S-33 |

## General Information

Unless otherwise noted, all commercially available compounds were used as received. All solvents were purified according to standard procedures. The  $^1\text{H}$  NMR and spectra was recorded at 400 MHz,  $^{13}\text{C}$  NMR was recorded at 100 MHz.  $^1\text{H}$  and  $^{13}\text{C}$  NMR Chemical shifts were calibrated to tetramethylsilane as an external reference. Data are reported in the following order: chemical shift ( $\delta$ ) in ppm; multiplicities are indicated s (singlet), d (doublet), t (triplet), dd (doublet of doublets), m (multiplet); coupling constants ( $J$ ) are in Hertz (Hz). HRMS were obtained on an IonSpec FT-ICR mass spectrometer with ESI resource. Melting points were measured on a RY-I apparatus and are reported uncorrected.

The starting materials **1** and **2** were readily prepared according to the related literatures.<sup>1-3</sup>

Abbreviations: Bn = benzyl, Ac = acetyl, DMF = *N,N*-dimethylformamide, DMAC = *N,N*-Dimethylacetamide, DCM= dichloromethane, Ts = *p*-toluenesulfonyl, Boc = *t*-butoxycarbonyl, TEMPO = 2,2,6,6-tetramethylpiperidinoxy.

## General Procedure for the Alkylation of Enamides

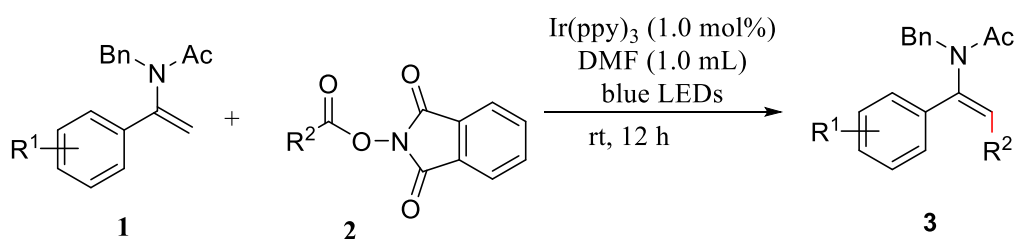

To a Schlenk tube equipped with a magnetic stir bar was charged with enamides **1** (0.30 mmol), alkyl NHP esters **2** (0.36 mmol), and Ir(ppy)<sub>3</sub> (2.0 mg, 1.0 mol%). The tube was sealed with a septum, evacuated and backfilled with nitrogen three times. 1.0 mL DMF was added *via* syringe with gentle stirring under N<sub>2</sub> atmosphere. The tube was sealed and stirred under blue LEDs for 12 h. The resulting mixture was extracted with ethyl acetate (3 × 10 mL). The combined organic phase was dried over anhydrous

sodium sulfate, and the solvent was then removed under vacuum. The residue was purified directly by silica gel chromatography, eluting with ethyl acetate/petroleum ether (1:10~1:3 v/v), to give compound **3**.

## Analytical Data for the Alkylated Enamides

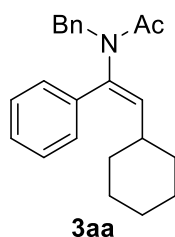

(*E*)-*N*-benzyl-*N*-(2-cyclohexyl-1-phenylvinyl)acetamide (**3aa**) was obtained in 76% yield (75.9 mg) as a colorless oil.  $^1\text{H}$  NMR (400 MHz,  $\text{CDCl}_3$ )  $\delta$  7.42-7.32 (m, 3H), 7.27-7.17 (m, 7H), 5.06 (dd,  $J = 10.7, 1.5$  Hz, 1H), 4.45 (br, s, 2H), 2.37-2.28 (m, 1H), 2.21 (s, 3H), 1.64-1.54 (m, 5H), 1.20-0.95 (m, 5H);  $^{13}\text{C}$  NMR (100 MHz,  $\text{CDCl}_3$ )  $\delta$  170.6, 138.6, 137.5, 136.5, 135.4, 129.2, 128.6, 128.5, 128.1, 127.2, 48.8, 37.1, 32.5, 25.8, 25.3, 22.3; HRMS (ESI) calcd for  $\text{C}_{23}\text{H}_{28}\text{NO}^+$  ( $\text{M} + \text{H}$ ) $^+$  334.2165, found 334.2162.

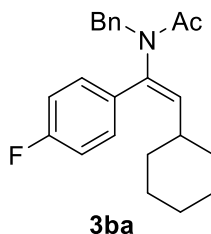

(*E*)-*N*-benzyl-*N*-(2-cyclohexyl-1-(4-fluorophenyl)vinyl)acetamide (**3ba**) was obtained in 89% yield (93.7 mg) as a colorless oil.  $^1\text{H}$  NMR (400 MHz,  $\text{CDCl}_3$ )  $\delta$  7.20-7.07 (m, 7H), 7.00 (t,  $J = 8.6$  Hz, 2H), 4.99 (d,  $J = 10.7$  Hz, 1H), 4.37 (br, s, 2H), 2.22-2.12 (m, 4H), 1.58-1.45 (m, 5H), 1.11-0.87 (m, 5H);  $^{13}\text{C}$  NMR (100 MHz,  $\text{CDCl}_3$ )  $\delta$  170.7, 162.6 (d,  $J = 248.6$  Hz), 138.6, 137.4, 135.6, 131.4 (d,  $J = 3.4$  Hz), 130.2 (d,  $J = 8.2$  Hz), 129.2, 128.2, 127.3, 115.7 (d,  $J = 21.6$  Hz), 48.8, 37.2, 32.5, 25.8, 25.3, 22.3;  $^{19}\text{F}$  NMR (376 MHz,  $\text{CDCl}_3$ )  $\delta$  -112.50; HRMS (ESI) calcd for  $\text{C}_{23}\text{H}_{26}\text{FNNaO}^+$  ( $\text{M} + \text{Na}$ ) $^+$  374.1891, found 374.1908.

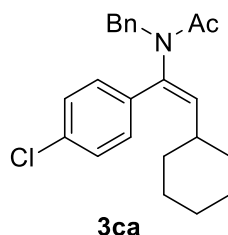

(*E*)-*N*-benzyl-*N*-(1-(4-chlorophenyl)-2-cyclohexylvinyl)acetamide (**3ca**) was obtained in 81% yield (89.7mg) as a colorless oil.  $^1\text{H}$  NMR (400 MHz,  $\text{CDCl}_3$ )  $\delta$  7.37 (dd,  $J = 8.6, 1.8$  Hz, 2H), 7.29-7.23 (m, 3H), 7.17-7.14 (m, 4H), 5.09 (d,  $J = 10.8$  Hz, 1H), 4.45 (br, s, 2H), 2.30-2.18 (m, 4H), 1.66-1.53 (m, 5H), 1.20-0.96 (m, 5H);  $^{13}\text{C}$  NMR (100 MHz,  $\text{CDCl}_3$ )  $\delta$  170.8, 139.3, 137.3, 135.5, 134.4, 133.9, 129.8, 129.3, 129.0, 128.3, 127.4, 48.9, 37.3, 32.5, 25.8, 25.3, 22.4; HRMS (ESI) calcd for  $\text{C}_{23}\text{H}_{27}\text{ClNO}^+$  ( $\text{M} + \text{H}$ ) $^+$  368.1776, found 368.1757.

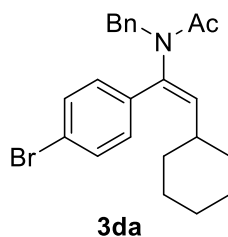

(*E*)-*N*-benzyl-*N*-(1-(4-bromophenyl)-2-cyclohexylvinyl)acetamide (**3da**) was obtained in 78% yield (96.2 mg) as a colorless oil.  $^1\text{H}$  NMR (400 MHz,  $\text{CDCl}_3$ )  $\delta$  7.52 (d,  $J = 8.4$  Hz, 2H), 7.28-7.22 (m, 3H), 7.18-7.15 (m, 2H), 7.11-7.07 (m, 2H), 5.09 (d,  $J = 10.8$  Hz, 1H), 4.45 (br, s, 2H), 2.30-2.18 (m, 4H), 1.66-1.52 (m, 5H), 1.19-0.95 (m, 5H);  $^{13}\text{C}$  NMR (100 MHz,  $\text{CDCl}_3$ )  $\delta$  170.6, 139.3, 137.3, 135.5, 134.3, 131.9, 130.1, 129.2, 128.2, 127.3, 122.5, 48.8, 37.2, 32.5, 25.7, 25.3, 22.3; HRMS (ESI) calcd for  $\text{C}_{23}\text{H}_{27}\text{BrNO}^+$  ( $\text{M} + \text{H}$ ) $^+$  412.1271, found 412.1270.

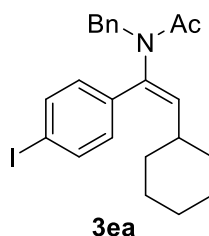

(*E*)-*N*-benzyl-*N*-(2-cyclohexyl-1-(4-iodophenyl)vinyl)acetamide (**3ea**) was obtained in 91% yield (125.5 mg) as a colorless oil.  $^1\text{H}$  NMR (400 MHz,  $\text{CDCl}_3$ )  $\delta$  7.72 (d,  $J = 8.2$  Hz, 2H), 7.27-7.14 (m, 5H), 6.98-6.94 (m, 2H), 5.09 (d,  $J = 10.8$  Hz, 1H), 4.45 (br, s, 2H), 2.31-2.21 (m, 1H), 2.18 (s, 3H), 1.65-1.51 (m, 5H), 1.20-0.94 (m, 5H);



$^{13}\text{C}$  NMR (100 MHz,  $\text{CDCl}_3$ )  $\delta$  170.6, 139.3, 137.8, 137.3, 135.6, 134.9, 130.2, 129.2, 128.2, 127.3, 94.3, 48.9, 37.2, 32.5, 25.7, 25.2, 22.3; HRMS (ESI) calcd for  $\text{C}_{23}\text{H}_{26}\text{INNaO}^+$  ( $\text{M} + \text{Na}$ ) $^+$  482.0951, found 482.0937.

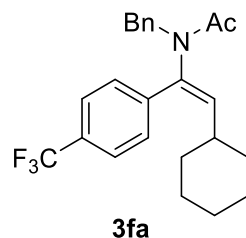

(*E*)-*N*-benzyl-*N*-(2-cyclohexyl-1-(4-(trifluoromethyl)phenyl)vinyl)acetamide (**3fa**) was obtained in 77% yield (93.0 mg) as a colorless oil.  $^1\text{H}$  NMR (400 MHz,  $\text{CDCl}_3$ )  $\delta$  7.65 (d,  $J$  = 8.2 Hz, 2H), 7.34 (d,  $J$  = 8.1 Hz, 2H), 7.28-7.23 (m, 3H), 7.18-7.15 (m, 2H), 5.19 (d,  $J$  = 10.9 Hz, 1H), 4.47 (br, s, 2H), 2.32-2.20 (m, 4H), 1.67-1.55 (m, 5H), 1.22-0.97 (m, 5H);  $^{13}\text{C}$  NMR (100 MHz,  $\text{CDCl}_3$ )  $\delta$  170.7, 140.4, 139.2, 137.2, 135.4, 130.5 (q,  $J$  = 32.6 Hz), 129.3, 128.8, 128.3, 127.4, 125.7 (q,  $J$  = 3.7 Hz), 124.0 (q,  $J$  = 272.2 Hz), 49.0, 37.3, 32.4, 25.7, 25.2, 22.3;  $^{19}\text{F}$  NMR (376 MHz,  $\text{CDCl}_3$ )  $\delta$  -62.63; HRMS (ESI) calcd for  $\text{C}_{24}\text{H}_{26}\text{F}_3\text{NNaO}^+$  ( $\text{M} + \text{Na}$ ) $^+$  424.1859, found 424.1844.

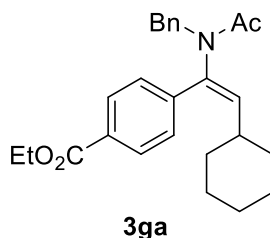

Ethyl (*E*)-4-(1-(*N*-benzylacetamido)-2-cyclohexylvinyl)benzoate (**3ga**) was obtained in 87% yield (105.7 mg) as a colorless oil.  $^1\text{H}$  NMR (400 MHz,  $\text{CDCl}_3$ )  $\delta$  8.07 (d,  $J$  = 8.2 Hz, 2H), 7.31-7.23 (m, 5H), 7.16 (dd,  $J$  = 7.5, 1.6 Hz, 2H), 5.17 (d,  $J$  = 10.8 Hz, 1H), 4.52-4.37 (m, 4H), 2.35-2.24 (m, 1H), 2.21 (s, 3H), 1.67-1.54 (m, 5H), 1.42 (t,  $J$  = 7.1 Hz, 3H), 1.19-0.98 (m, 5H);  $^{13}\text{C}$  NMR (100 MHz,  $\text{CDCl}_3$ )  $\delta$  170.7, 166.1, 140.2, 140.0, 137.3, 135.8, 130.5, 129.9, 129.3, 128.4, 128.2, 127.4, 61.2, 49.0, 37.3, 32.5, 25.7, 25.3, 22.3, 14.4; HRMS (ESI) calcd for  $\text{C}_{26}\text{H}_{31}\text{NNaO}_3^+$  ( $\text{M} + \text{Na}$ ) $^+$  428.2196, found 428.2161.

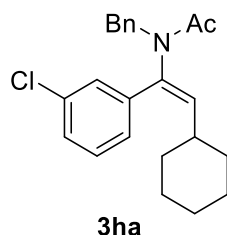

(*E*)-*N*-benzyl-*N*-(1-(3-chlorophenyl)-2-cyclohexylvinyl)acetamide (**3ha**) was obtained in 88% yield (96.8 mg) as a colorless oil.  $^1\text{H}$  NMR (400 MHz,  $\text{CDCl}_3$ )  $\delta$  7.33 (dd,  $J = 3.7, 1.5$  Hz, 2H), 7.30-7.23 (m, 3H), 7.20-7.16 (m, 3H), 7.13-7.10 (m, 1H), 5.11 (d,  $J = 10.8$  Hz, 1H), 4.46 (br, s, 2H), 2.31-2.19 (m, 4H), 1.67-1.54 (m, 5H), 1.21-0.95 (m, 5H);  $^{13}\text{C}$  NMR (100 MHz,  $\text{CDCl}_3$ )  $\delta$  170.7, 139.8, 137.3, 137.3, 135.3, 134.7, 130.0, 129.3, 128.7, 128.4, 128.3, 127.4, 126.8, 49.0, 37.2, 32.5, 25.7, 25.2, 22.3; HRMS (ESI) calcd for  $\text{C}_{23}\text{H}_{27}\text{ClNO}^+$  ( $\text{M} + \text{H}$ ) $^+$  368.1776, found 368.1772.

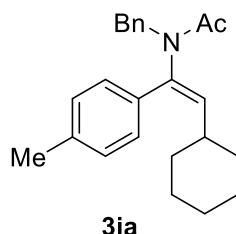

(*E*)-*N*-benzyl-*N*-(2-cyclohexyl-1-(*p*-tolyl)vinyl)acetamide (**3ia**) was obtained in 80% yield (83.5 mg) as a colorless oil.  $^1\text{H}$  NMR (400 MHz,  $\text{CDCl}_3$ )  $\delta$  7.28-7.13 (m, 9H), 5.01 (d,  $J = 10.7$  Hz, 1H), 4.44 (br, s, 2H), 2.40-2.28 (m, 4H), 2.21 (s, 3H), 1.66-1.54 (m, 5H), 1.23-1.08 (m, 3H), 1.02-0.91 (m, 2H);  $^{13}\text{C}$  NMR (100 MHz,  $\text{CDCl}_3$ )  $\delta$  170.9, 138.5, 138.3, 137.6, 136.4, 132.4, 129.4, 129.3, 128.4, 128.2, 127.2, 48.8, 37.2, 32.6, 25.9, 25.4, 22.4, 21.4; HRMS (ESI) calcd for  $\text{C}_{24}\text{H}_{30}\text{NO}^+$  ( $\text{M} + \text{H}$ ) $^+$  348.2322, found 348.2328.

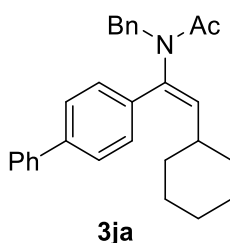

(*E*)-*N*-(1-([1,1'-biphenyl]-4-yl)-2-cyclohexylvinyl)-*N*-benzylacetamide (**3ja**) was obtained in 84% yield (103.1 mg) as a colorless oil.  $^1\text{H}$  NMR (400 MHz,  $\text{CDCl}_3$ )  $\delta$  7.64-7.61 (m, 4H), 7.49-7.44 (m, 2H), 7.40-7.35 (m, 1H), 7.33-7.20 (m, 7H), 5.09 (d,  $J = 10.8$  Hz, 1H), 4.50 (br, s, 2H), 2.45-2.34 (m, 1H), 2.23 (s, 3H), 1.68-1.58 (m, 5H), 1.24-

0.96 (m, 5H);  $^{13}\text{C}$  NMR (100 MHz,  $\text{CDCl}_3$ )  $\delta$  170.8, 141.3, 140.4, 139.0, 137.6, 136.2, 134.3, 129.4, 129.0, 128.9, 128.2, 127.7, 127.4, 127.3, 127.1, 48.9, 37.3, 32.6, 25.8, 25.4, 22.4; HRMS (ESI) calcd for  $\text{C}_{29}\text{H}_{31}\text{NNaO}^+$  ( $\text{M} + \text{Na}$ ) $^+$  432.2298, found 432.2288.

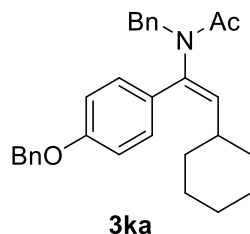

(*E*)-*N*-benzyl-*N*-(1-(4-(benzyloxy)phenyl)-2-cyclohexylvinyl)acetamide (**3ka**) was obtained in 70% yield (92.3 mg) as a colorless oil.  $^1\text{H}$  NMR (400 MHz,  $\text{CDCl}_3$ )  $\delta$  7.49-7.41 (m, 4H), 7.39-7.34 (m, 1H), 7.30-7.23 (m, 3H), 7.22-7.17 (m, 4H), 7.03-6.99 (m, 2H), 5.11 (s, 2H), 5.00 (d,  $J = 10.7$  Hz, 1H), 4.47 (br, s, 2H), 2.38-2.28 (m, 1H), 2.22 (s, 3H), 1.68-1.56 (m, 5H), 1.23-0.96 (m, 5H);  $^{13}\text{C}$  NMR (100 MHz,  $\text{CDCl}_3$ )  $\delta$  170.8, 158.9, 137.7, 137.6, 136.8, 136.1, 129.8, 129.3, 128.8, 128.2, 128.2, 127.9, 127.6, 127.2, 114.9, 70.2, 48.8, 37.2, 32.6, 25.9, 25.4, 22.3; HRMS (ESI) calcd for  $\text{C}_{30}\text{H}_{33}\text{NNaO}_2^+$  ( $\text{M} + \text{Na}$ ) $^+$  462.2404, found 462.2403.

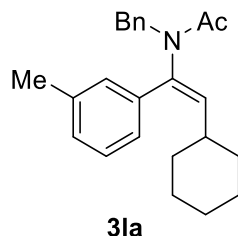

(*E*)-*N*-benzyl-*N*-(2-cyclohexyl-1-(*m*-tolyl)vinyl)acetamide (**3la**) was obtained in 54% yield (56.7 mg) as a colorless oil.  $^1\text{H}$  NMR (400 MHz,  $\text{CDCl}_3$ )  $\delta$  7.30-7.15 (m, 7H), 7.07-7.01 (m, 2H), 5.05 (d,  $J = 10.7$  Hz, 1H), 4.45 (br, s, 1H), 2.38-2.29 (m, 4H), 2.21 (s, 3H), 1.66-1.55 (m, 5H), 1.21-0.94 (m, 5H);  $^{13}\text{C}$  NMR (100 MHz,  $\text{CDCl}_3$ )  $\delta$  170.8, 138.5, 138.4, 137.7, 136.6, 135.4, 129.3, 128.9, 128.5, 128.2, 127.2, 125.9, 48.9, 37.2, 32.6, 25.9, 25.3, 22.4, 21.7; HRMS (ESI) calcd for  $\text{C}_{24}\text{H}_{30}\text{NO}^+$  ( $\text{M} + \text{H}$ ) $^+$  348.2322, found 348.2336.

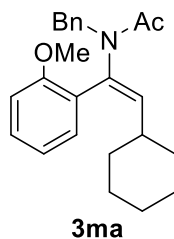

(*E*)-*N*-benzyl-*N*-(2-cyclohexyl-1-(2-methoxyphenyl)vinyl)acetamide (**3ma**) was obtained in 64% yield (69.8 mg) as a colorless oil.  $^1\text{H}$  NMR (400 MHz,  $\text{CDCl}_3$ )  $\delta$  7.27-7.22 (m, 1H), 7.17-7.08 (m, 5H), 6.95 (dd,  $J = 7.5, 1.8$  Hz, 1H), 6.85 (td,  $J = 7.4, 1.0$  Hz, 1H), 6.81 (dd,  $J = 8.3, 0.7$  Hz, 1H), 5.09 (d,  $J = 10.5$  Hz, 1H), 4.33 (br, s, 2H), 3.68 (s, 3H), 2.24 (s, 3H), 1.96-1.85 (m, 1H), 1.54-1.44 (m, 5H), 1.04-0.88 (m, 5H);  $^{13}\text{C}$  NMR (100 MHz,  $\text{CDCl}_3$ )  $\delta$  171.5, 157.8, 138.8, 138.0, 134.9, 131.9, 130.0, 128.8, 128.0, 126.8, 124.0, 120.3, 111.0, 55.2, 48.2, 37.5, 32.5, 25.9, 25.4, 22.5; HRMS (ESI) calcd for  $\text{C}_{24}\text{H}_{30}\text{NO}_2^+$  ( $\text{M} + \text{H}$ ) $^+$  364.2271, found 364.2275.

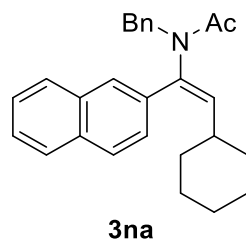

(*E*)-*N*-benzyl-*N*-(2-cyclohexyl-1-(naphthalen-2-yl)vinyl)acetamide (**3na**) was obtained in 76% yield (87.4 mg) as a colorless oil.  $^1\text{H}$  NMR (400 MHz,  $\text{CDCl}_3$ )  $\delta$  7.92-7.85 (m, 3H), 7.73 (s, 1H), 7.58-7.53 (m, 2H), 7.39 (dd,  $J = 8.5, 1.5$  Hz, 1H), 7.34-7.24 (m, 5H), 5.20 (d,  $J = 10.7$  Hz, 1H), 4.55 (br, s, 2H), 2.51-2.40 (m, 1H), 2.32 (s, 3H), 1.71-1.60 (m, 5H), 1.24-1.03 (m, 5H);  $^{13}\text{C}$  NMR (100 MHz,  $\text{CDCl}_3$ )  $\delta$  170.9, 139.0, 137.6, 136.6, 133.2, 133.2, 132.8, 129.3, 128.4, 128.3, 128.2, 127.8, 127.7, 127.2, 126.7, 126.6, 126.1, 49.0, 37.3, 32.6, 25.8, 25.3, 22.5; HRMS (ESI) calcd for  $\text{C}_{27}\text{H}_{30}\text{NO}^+$  ( $\text{M} + \text{H}$ ) $^+$  384.2322, found 384.2336.

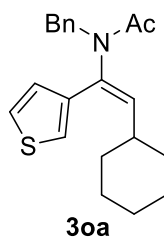

(*E*)-*N*-benzyl-*N*-(2-cyclohexyl-1-(thiophen-3-yl)vinyl)acetamide (**3oa**) was obtained in 72% yield (73.5 mg) as a colorless oil.  $^1\text{H}$  NMR (400 MHz,  $\text{CDCl}_3$ )  $\delta$  7.36

(dd,  $J = 5.0, 1.2$  Hz, 1H), 7.28-7.23 (m, 5H), 7.06 (dd,  $J = 5.0, 3.6$  Hz, 1H), 7.02 (dd,  $J = 3.6, 1.2$  Hz, 1H), 4.95 (d,  $J = 10.4$  Hz, 1H), 4.60 (br, s, 2H), 2.62 (qt,  $J = 10.7, 3.4$  Hz, 1H), 2.13-2.09 (m, 3H), 1.73-1.60 (m, 5H), 1.32-1.10 (m, 3H), 1.00-0.90 (m, 2H);  $^{13}\text{C}$  NMR (100 MHz,  $\text{CDCl}_3$ )  $\delta$  170.8, 139.4, 138.8, 137.6, 130.8, 129.7, 128.3, 127.5, 127.3, 126.9, 126.4, 49.5, 37.5, 32.2, 25.8, 25.4, 22.0; HRMS (ESI) calcd for  $\text{C}_{21}\text{H}_{25}\text{NNaOS}^+$  ( $\text{M} + \text{Na}$ ) $^+$  362.1549, found 362.1576.

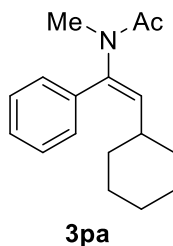

(*E*)-*N*-(2-cyclohexyl-1-phenylvinyl)-*N*-methylacetamide (**3pa**) was obtained in 65% yield (50.2 mg) as a colorless oil.  $^1\text{H}$  NMR (400 MHz,  $\text{CDCl}_3$ )  $\delta$  7.42-7.33 (m, 3H), 7.29-7.25 (m, 2H), 5.45 (d,  $J = 10.7$  Hz, 1H), 2.91 (s, 3H), 2.45-2.35 (m, 1H), 2.15 (s, 3H), 1.79-1.64 (m, 5H), 1.29-1.13 (m, 5H);  $^{13}\text{C}$  NMR (100 MHz,  $\text{CDCl}_3$ )  $\delta$  171.2, 139.5, 135.8, 135.6, 128.7, 128.6, 128.3, 37.2, 35.0, 32.9, 25.9, 25.5, 22.2; HRMS (ESI) calcd for  $\text{C}_{17}\text{H}_{23}\text{NNaO}^+$  ( $\text{M} + \text{Na}$ ) $^+$  280.1672, found 280.1672.

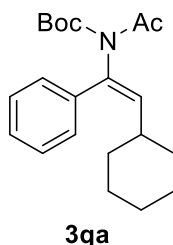

*Tert*-butyl (*E*)-acetyl(2-cyclohexyl-1-phenylvinyl)carbamate (**3qa**) was obtained in 53% yield (54.6 mg) as a colorless oil.  $^1\text{H}$  NMR (400 MHz,  $\text{CDCl}_3$ )  $\delta$  7.33-7.27 (m, 5H), 5.39 (d,  $J = 10.6$  Hz, 1H), 2.47 (s, 3H), 2.34 (td,  $J = 10.4, 3.4$  Hz, 1H), 1.78-1.61 (m, 5H), 1.37 (s, 9H), 1.23-1.10 (h,  $J = 11.4, 10.3$  Hz, 5H);  $^{13}\text{C}$  NMR (100 MHz,  $\text{CDCl}_3$ )  $\delta$  173.1, 153.2, 137.4, 137.2, 134.3, 128.7, 128.1, 127.8, 82.8, 37.2, 32.8, 27.9, 26.4, 26.0, 25.5; HRMS (ESI) calcd for  $\text{C}_{21}\text{H}_{29}\text{NNaO}_3^+$  ( $\text{M} + \text{Na}$ ) $^+$  366.2040, found 366.2040.

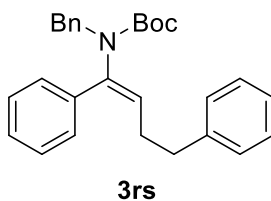

*Tert*-butyl (*E*)-benzyl(1,4-diphenylbut-1-en-1-yl)carbamate (**3rs**) was obtained in 65% yield (80.6 mg) as a colorless oil.  $^1\text{H}$  NMR (400 MHz,  $\text{CDCl}_3$ )  $\delta$  7.33-7.18 (m, 10H), 7.16-7.11 (m, 1H), 7.10-7.07 (m, 2H), 7.02-6.98 (m, 2H), 5.47 (t,  $J = 7.5$  Hz, 1H), 4.54 (s, 2H), 2.59 (t,  $J = 7.6$  Hz, 2H), 2.42 (q,  $J = 7.6$  Hz, 2H), 1.29 (s, 9H);  $^{13}\text{C}$  NMR (100 MHz,  $\text{CDCl}_3$ )  $\delta$  155.3, 141.4, 139.6, 138.9, 137.5, 128.7, 128.5, 128.4, 128.4, 128.3, 128.0, 127.6, 127.2, 126.0, 80.1, 52.8, 36.0, 30.3, 28.2; HRMS (ESI) calcd for  $\text{C}_{28}\text{H}_{31}\text{NNaO}_2^+$  ( $\text{M} + \text{Na}$ ) $^+$  436.2247, found 436.2248.

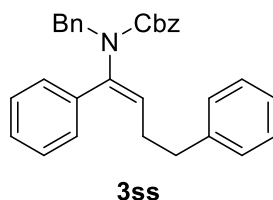

Benzyl (*E*)-benzyl(1,4-diphenylbut-1-en-1-yl)carbamate (**3ss**) was obtained in 73% yield (97.5 mg) as a colorless oil.  $^1\text{H}$  NMR (400 MHz,  $\text{CDCl}_3$ )  $\delta$  7.32-7.24 (m, 10H), 7.22-7.13 (m, 6H), 7.10-7.06 (m, 2H), 6.99-6.94 (m, 2H), 5.49 (s, 1H), 5.12 (s, 2H), 4.50 (s, 2H), 2.55 (t,  $J = 7.5$  Hz, 2H), 2.40 (q,  $J = 7.5$  Hz, 2H);  $^{13}\text{C}$  NMR (100 MHz,  $\text{CDCl}_3$ )  $\delta$  156.2, 141.3, 138.3, 138.1, 136.6, 136.4, 129.7, 128.8, 128.6, 128.5, 128.4, 128.4, 128.3, 128.0, 127.9, 127.9, 127.4, 126.0, 67.5, 52.4, 35.8, 30.3; HRMS (ESI) calcd for  $\text{C}_{31}\text{H}_{29}\text{NNaO}_2^+$  ( $\text{M} + \text{Na}$ ) $^+$  470.2091, found 470.2091.

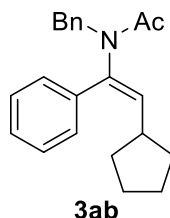

(*E*)-*N*-benzyl-*N*-(2-cyclopentyl-1-phenylvinyl)acetamide (**3ab**) was obtained in 76% yield (72.6 mg) as a colorless oil.  $^1\text{H}$  NMR (400 MHz,  $\text{CDCl}_3$ )  $\delta$  7.42-7.33 (m, 3H), 7.29-7.18 (m, 7H), 5.12 (d,  $J = 10.7$  Hz, 1H), 4.46 (br, s, 2H), 2.74-2.62 (m, 1H), 2.21 (s, 3H), 1.78-1.70 (m, 2H), 1.62-1.46 (m, 4H), 1.19-1.10 (m, 2H);  $^{13}\text{C}$  NMR (100

MHz, CDCl<sub>3</sub>)  $\delta$  170.9, 138.3, 137.6, 136.7, 135.3, 129.3, 128.7, 128.7, 128.5, 128.2, 127.3, 48.9, 38.9, 33.6, 25.5, 22.3; HRMS (ESI) calcd for C<sub>22</sub>H<sub>25</sub>NNaO<sup>+</sup> (M + Na)<sup>+</sup> 342.1828, found 342.1853.

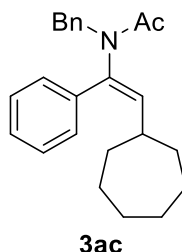

(*E*)-*N*-benzyl-*N*-(2-cycloheptyl-1-phenylvinyl)acetamide (**3ac**) was obtained in 81% yield (84.1 mg) as a colorless oil. <sup>1</sup>H NMR (400 MHz, CDCl<sub>3</sub>)  $\delta$  7.41-7.32 (m, 3H), 7.28-7.17 (m, 7H), 5.14 (d, *J* = 11.1 Hz, 1H), 4.45 (br, s, 2H), 2.53-2.42 (m, 1H), 2.22 (s, 3H), 1.62-1.32 (m, 10H), 1.25-1.15 (m, 2H); <sup>13</sup>C NMR (100 MHz, CDCl<sub>3</sub>)  $\delta$  170.7, 139.2, 137.5, 135.2, 135.0, 129.2, 128.6, 128.5, 128.4, 128.1, 127.2, 48.7, 38.3, 34.3, 28.2, 26.1, 22.3; HRMS (ESI) calcd for C<sub>24</sub>H<sub>29</sub>NNaO<sup>+</sup> (M + Na)<sup>+</sup> 370.2141, found 370.2163.

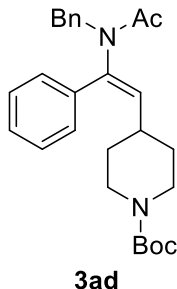

*tert*-Butyl (*E*)-4-(2-(*N*-benzylacetamido)-2-phenylvinyl)piperidine-1-carboxylate (**3ad**) was obtained in 74% yield (96.6 mg) as a colorless oil. <sup>1</sup>H NMR (400 MHz, CDCl<sub>3</sub>)  $\delta$  7.45-7.39 (m, 3H), 7.28-7.22 (m, 5H), 7.18-7.15 (m, 2H), 5.03 (d, *J* = 10.6 Hz, 1H), 4.46 (br, s, 2H), 3.99 (br, s, 2H), 2.62 (t, *J* = 11.8 Hz, 2H), 2.50-2.40 (m, 1H), 2.21 (s, 3H), 1.56-1.47 (m, 2H), 1.43 (s, 9H), 1.23-1.13 (m, 2H); <sup>13</sup>C NMR (100 MHz, CDCl<sub>3</sub>)  $\delta$  170.4, 154.6, 137.7, 137.3, 136.2, 134.9, 129.1, 128.8, 128.8, 128.4, 128.1, 127.2, 79.4, 48.6, 43.3, 42.7, 35.3, 31.4, 28.4, 22.2; HRMS (ESI) calcd for C<sub>27</sub>H<sub>35</sub>N<sub>2</sub>O<sub>3</sub><sup>+</sup> (M + H)<sup>+</sup> 435.2642, found 435.2642.

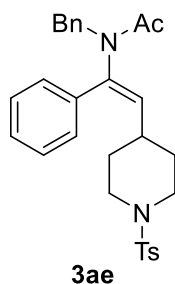

(*E*)-*N*-benzyl-*N*-(1-phenyl-2-(1-tosylpiperidin-4-yl)vinyl)acetamide (**3ae**) was obtained in 62% yield (90.1 mg) as a colorless oil.  $^1\text{H}$  NMR (400 MHz,  $\text{CDCl}_3$ )  $\delta$  7.58 (d,  $J = 8.2$  Hz, 2H), 7.37-7.33 (m, 3H), 7.30-7.23 (m, 5H), 7.16-7.13 (m, 4H), 5.00 (d,  $J = 10.5$  Hz, 1H), 4.45 (br, s, 2H), 3.65 (d,  $J = 11.8$  Hz, 2H), 2.41 (s, 3H), 2.23-2.12 (m, 6H), 1.61-1.55 (m, 2H), 1.43-1.32 (m, 2H);  $^{13}\text{C}$  NMR (100 MHz,  $\text{CDCl}_3$ )  $\delta$  170.3, 143.6, 138.4, 137.3, 135.4, 134.9, 133.0, 129.7, 129.1, 128.9, 128.8, 128.3, 128.2, 127.7, 127.4, 48.8, 45.4, 34.5, 31.0, 22.3, 21.6; HRMS (ESI) calcd for  $\text{C}_{29}\text{H}_{32}\text{N}_2\text{NaO}_3\text{S}^+$  ( $\text{M} + \text{Na}$ ) $^+$  511.2026, found 511.2036.

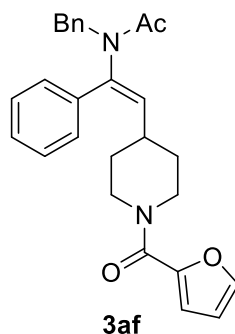

(*E*)-*N*-benzyl-*N*-(2-(1-(furan-2-carbonyl)piperidin-4-yl)-1-phenylvinyl)acetamide(**3af**) was obtained in 64% yield (82.2 mg) as a colorless oil.  $^1\text{H}$  NMR (400 MHz,  $\text{CDCl}_3$ )  $\delta$  7.43-7.37 (m, 4H), 7.26-7.19 (m, 5H), 7.16-7.12 (m, 2H), 6.90 (d,  $J = 3.5$  Hz, 1H), 6.42 (dd,  $J = 3.4, 1.8$  Hz, 1H), 5.02 (d,  $J = 10.5$  Hz, 1H), 4.53-4.35 (m, 4H), 2.84 (br, s, 1H), 2.65-2.55 (m, 1H), 2.20 (s, 3H), 1.61 (d,  $J = 11.3$  Hz, 2H), 1.34-1.22 (m, 3H);  $^{13}\text{C}$  NMR (100 MHz,  $\text{CDCl}_3$ )  $\delta$  170.5, 159.2, 148.0, 143.7, 138.2, 137.4, 135.8, 135.0, 129.2, 129.1, 129.0, 128.5, 128.3, 127.4, 116.1, 111.3, 48.8, 45.7, 42.7, 35.6, 31.9, 22.4; HRMS (ESI) calcd for  $\text{C}_{27}\text{H}_{28}\text{N}_2\text{NaO}_3^+$  ( $\text{M} + \text{Na}$ ) $^+$  451.1992, found 451.2003.



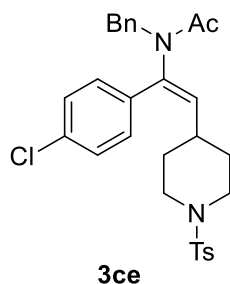

(*E*)-*N*-benzyl-*N*-(1-(4-chlorophenyl)-2-(1-tosylpiperidin-4-yl)vinyl)acetamide (**3ce**) was obtained in 51% yield (80.0 mg) as a white solid. m.p. 145-146 °C; <sup>1</sup>H NMR (400 MHz, CDCl<sub>3</sub>) δ 7.58 (d, *J* = 8.4 Hz, 2H), 7.31 (t, *J* = 7.9 Hz, 4H), 7.25 (dd, *J* = 5.0, 1.7 Hz, 3H), 7.13-7.10 (m, 2H), 7.05 (d, *J* = 8.4 Hz, 2H), 5.03 (d, *J* = 10.5 Hz, 1H), 4.45 (br, s, 2H), 3.66 (d, *J* = 11.8 Hz, 2H), 2.42 (s, 3H), 2.17-2.09 (m, 6H), 1.56 (dd, *J* = 13.1, 2.4 Hz, 2H), 1.39 (ddd, *J* = 15.9, 12.6, 4.1 Hz, 2H); <sup>13</sup>C NMR (100 MHz, CDCl<sub>3</sub>) δ 170.3, 143.7, 137.5, 137.1, 136.0, 134.8, 133.5, 132.9, 129.8, 129.7, 129.1, 129.1, 128.4, 127.8, 127.5, 48.9, 45.5, 34.7, 31.0, 22.4, 21.6; HRMS (ESI) calcd for C<sub>29</sub>H<sub>31</sub>ClN<sub>2</sub>NaO<sub>3</sub>S<sup>+</sup> (*M* + Na)<sup>+</sup> 545.1636, found 545.1630.

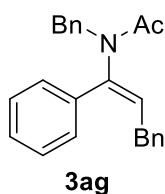

(*E*)-*N*-benzyl-*N*-(1,3-diphenylprop-1-en-1-yl)acetamide (**3ag**) was obtained in 46% yield (47.1 mg) as a colorless oil. <sup>1</sup>H NMR (400 MHz, CDCl<sub>3</sub>) δ 7.42-7.37 (m, 3H), 7.30-7.25 (m, 5H), 7.22-7.17 (m, 5H), 6.84 (d, *J* = 6.5 Hz, 2H), 5.49 (t, *J* = 8.1 Hz, 1H), 4.53 (br, s, 2H), 3.50 (d, *J* = 8.1 Hz, 2H), 2.23 (s, 3H); <sup>13</sup>C NMR (100 MHz, CDCl<sub>3</sub>) δ 170.8, 139.5, 139.3, 137.7, 134.6, 130.2, 129.2, 129.0, 128.9, 128.7, 128.6, 128.5, 128.1, 127.4, 126.4, 48.7, 34.5, 22.5; HRMS (ESI) calcd for C<sub>24</sub>H<sub>23</sub>NNaO<sup>+</sup> (*M* + Na)<sup>+</sup> 364.1672, found 364.1677.

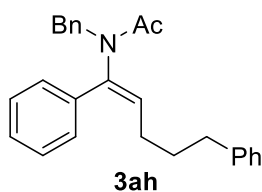

(*E*)-*N*-benzyl-*N*-(1,5-diphenylpent-1-en-1-yl)acetamide (**3ah**) was obtained in 66% yield (73.1 mg) as a colorless oil. <sup>1</sup>H NMR (400 MHz, CDCl<sub>3</sub>) δ 7.40-7.34 (m, 3H),

7.28-7.16 (m, 10H), 7.04 (d,  $J = 7.6$  Hz, 2H), 5.32 (t,  $J = 7.7$  Hz, 1H), 4.48 (br, s, 2H), 2.48 (t,  $J = 7.7$  Hz, 2H), 2.24-2.17 (m, 5H), 1.65-1.57 (m, 2H);  $^{13}\text{C}$  NMR (100 MHz,  $\text{CDCl}_3$ )  $\delta$  170.9, 141.8, 138.7, 137.7, 135.0, 132.5, 129.1, 128.7, 128.7, 128.6, 128.4, 128.4, 128.3, 127.3, 126.0, 49.0, 35.4, 31.3, 28.1, 22.4; HRMS (ESI) calcd for  $\text{C}_{26}\text{H}_{27}\text{NNaO}^+$  ( $\text{M} + \text{Na}$ ) $^+$  392.1985, found 392.2002.

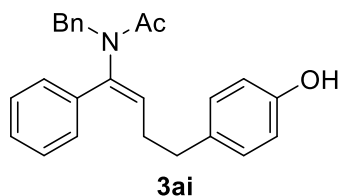

(*E*)-*N*-benzyl-*N*-(4-(4-hydroxyphenyl)-1-phenylbut-1-en-1-yl)acetamide (**3ai**) was obtained in 72% yield (80.1 mg) as a colorless oil.  $^1\text{H}$  NMR (400 MHz,  $\text{CDCl}_3$ )  $\delta$  7.69 (br, s, 1H), 7.39-7.34 (m, 3H), 7.29-7.23 (m, 3H), 7.18-7.13 (m, 4H), 6.80-6.72 (m, 4H), 5.29 (t,  $J = 7.3$  Hz, 1H), 4.46 (br, s, 2H), 2.57-2.44 (m, 4H), 2.01 (s, 3H);  $^{13}\text{C}$  NMR (100 MHz,  $\text{CDCl}_3$ )  $\delta$  172.0, 155.1, 138.7, 137.3, 134.7, 132.4, 131.8, 129.5, 129.0, 128.8, 128.7, 128.4, 127.4, 115.5, 49.3, 34.5, 30.2, 21.8; HRMS (ESI) calcd for  $\text{C}_{25}\text{H}_{25}\text{NNaO}_2^+$  ( $\text{M} + \text{Na}$ ) $^+$  394.1778, found 394.1783.

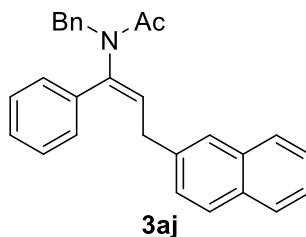

(*E*)-*N*-benzyl-*N*-(3-(naphthalen-2-yl)-1-phenylprop-1-en-1-yl)acetamide (**3aj**) was obtained in 70% yield (82.1 mg) as a colorless oil.  $^1\text{H}$  NMR (400 MHz,  $\text{CDCl}_3$ )  $\delta$  7.80-7.77 (m, 1H), 7.69 (t,  $J = 8.0$  Hz, 2H), 7.48-7.38 (m, 5H), 7.33-7.29 (m, 5H), 7.26 (s, 1H), 7.24-7.21 (m, 2H), 7.03 (dd,  $J = 8.4, 1.5$  Hz, 1H), 5.61 (t,  $J = 8.1$  Hz, 1H), 4.55 (br, s, 2H), 3.66 (d,  $J = 8.1$  Hz, 2H), 2.26 (s, 3H);  $^{13}\text{C}$  NMR (100 MHz,  $\text{CDCl}_3$ )  $\delta$  170.9, 139.9, 137.7, 137.0, 134.6, 133.7, 132.2, 129.8, 129.2, 129.0, 128.9, 128.7, 128.6, 128.3, 127.7, 127.6, 127.5, 126.9, 126.2, 126.0, 125.6, 48.8, 34.8, 22.5; HRMS (ESI) calcd for  $\text{C}_{28}\text{H}_{25}\text{NNaO}^+$  ( $\text{M} + \text{Na}$ ) $^+$  414.1828, found 414.1837.

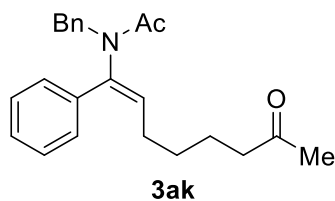

(*E*)-*N*-benzyl-*N*-(7-oxo-1-phenyloct-1-en-1-yl)acetamide (**3ak**) was obtained in 77% yield (80.7 mg) as a colorless oil.  $^1\text{H}$  NMR (400 MHz,  $\text{CDCl}_3$ )  $\delta$  7.42-7.34 (m, 3H), 7.28-7.18 (m, 7H), 5.28 (t,  $J = 7.7$  Hz, 1H), 4.48 (br, s, 2H), 2.33 (t,  $J = 7.2$  Hz, 2H), 2.22 (s, 3H), 2.17 (dd,  $J = 15.1, 7.6$  Hz, 2H), 2.07 (s, 3H), 1.49-1.41 (m, 2H), 1.33-1.24 (m, 2H);  $^{13}\text{C}$  NMR (100 MHz,  $\text{CDCl}_3$ )  $\delta$  208.6, 170.8, 138.6, 137.7, 135.0, 132.3, 129.0, 128.7, 128.6, 128.6, 128.3, 127.2, 49.0, 43.3, 30.0, 28.9, 28.4, 23.3, 22.3; HRMS (ESI) calcd for  $\text{C}_{23}\text{H}_{27}\text{NNaO}_2^+$  ( $\text{M} + \text{Na}$ ) $^+$  372.1934, found 372.1953.

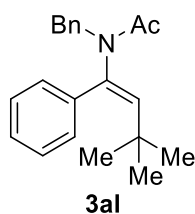

(*E*)-*N*-benzyl-*N*-(3,3-dimethyl-1-phenylbut-1-en-1-yl)acetamide (**3al**) was obtained in 73% yield (67.1 mg) as a colorless oil.  $^1\text{H}$  NMR (400 MHz,  $\text{CDCl}_3$ )  $\delta$  7.37-7.34 (m, 3H), 7.30-7.21 (m, 7H), 5.24 (s, 1H), 4.40 (br, s, 2H), 2.34 (s, 3H), 0.85 (s, 9H);  $^{13}\text{C}$  NMR (100 MHz,  $\text{CDCl}_3$ )  $\delta$  170.3, 143.3, 137.7, 136.3, 136.0, 130.0, 129.1, 128.7, 128.2, 128.1, 127.2, 47.9, 32.9, 30.7, 22.6; HRMS (ESI) calcd for  $\text{C}_{21}\text{H}_{25}\text{NNaO}^+$  ( $\text{M} + \text{Na}$ ) $^+$  330.1828, found 330.1856.

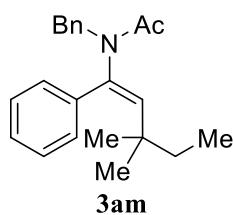

(*E*)-*N*-benzyl-*N*-(3,3-dimethyl-1-phenylpent-1-en-1-yl)acetamide (**3am**) was obtained in 45% yield (43.3 mg) as a colorless oil.  $^1\text{H}$  NMR (400 MHz,  $\text{CDCl}_3$ )  $\delta$  7.37-7.34 (m, 3H), 7.28-7.21 (m, 7H), 5.16 (d,  $J = 13.8$  Hz, 1H), 4.42 (br, s, 2H), 2.37 (s, 3H), 1.20 (q,  $J = 7.5$  Hz, 2H), 0.75 (s, 6H), 0.61 (t,  $J = 7.5$  Hz, 3H);  $^{13}\text{C}$  NMR (100MHz,  $\text{CDCl}_3$ )  $\delta$  170.3, 142.6, 137.8, 136.6, 136.5, 129.9, 129.1, 128.7, 128.3, 128.1, 127.2,

47.8, 36.8, 36.3, 28.1, 22.7, 9.1; HRMS (ESI) calcd for  $C_{22}H_{28}NO^+$  ( $M + H$ ) $^+$  322.2165, found 322.2174.

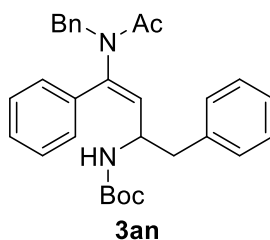

*tert*-Butyl(*E*)-(4-(*N*-benzylacetamido)-1,4-diphenylbut-3-en-2-yl)carbamate (**3an**) was obtained in 85% yield (120.4 mg) as a colorless oil.  $^1H$  NMR (400 MHz,  $CDCl_3$ )  $\delta$  7.37-7.29 (m, 6H), 7.20-7.15 (m, 5H), 7.09 (dt,  $J = 7.4, 3.7$  Hz, 2H), 6.84-6.79 (m, 2H), 5.08 (d,  $J = 9.7$  Hz, 1H), 4.80 (d,  $J = 14.4$  Hz, 1H), 4.47 (br, s, 2H), 4.04 (d,  $J = 14.1$  Hz, 1H), 2.85 (d,  $J = 12.4$  Hz, 1H), 2.75-2.68 (m, 1H), 2.08 (s, 3H), 1.36 (s, 9H);  $^{13}C$  NMR (100 MHz,  $CDCl_3$ )  $\delta$  170.8, 154.6, 140.4, 137.6, 136.4, 134.4, 131.4, 129.7, 129.2, 129.1, 128.8, 128.6, 128.5, 127.4, 126.8, 79.5, 49.8, 48.7, 41.4, 28.3, 22.2; HRMS (ESI) calcd for  $C_{30}H_{34}N_2NaO_3^+$  ( $M + Na$ ) $^+$  493.2462, found 493.2469.

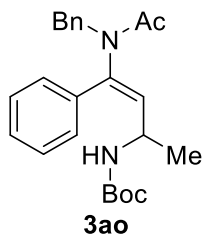

*tert*-Butyl(*E*)-(4-(*N*-benzylacetamido)-4-phenylbut-3-en-2-yl)carbamate (**3ao**) was obtained in 50% yield (59.5 mg) as a colorless oil.  $^1H$  NMR (400 MHz,  $CDCl_3$ )  $\delta$  7.44-7.18 (m, 10H), 5.04 (d,  $J = 9.7$  Hz, 1H), 4.66 (d,  $J = 12.5$  Hz, 1H), 4.48-4.22 (m, 3H), 2.22 (s, 3H), 1.37 (s, 9H), 1.12 (d,  $J = 6.6$  Hz, 3H);  $^{13}C$  NMR (100 MHz,  $CDCl_3$ )  $\delta$  170.7, 154.7, 138.9, 137.5, 134.5, 134.2, 129.3, 129.1, 128.9, 128.7, 128.3, 127.3, 79.3, 48.8, 44.9, 28.4, 22.3, 21.3; HRMS (ESI) calcd for  $C_{24}H_{31}N_2O_3^+$  ( $M + H$ ) $^+$  395.2329, found 395.2334.

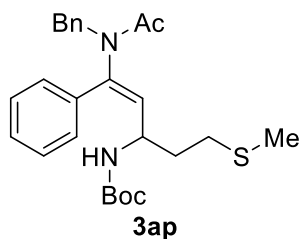

*tert*-Butyl(*E*)-(1-(*N*-benzylacetamido)-5-(methylthio)-1-phenylpent-1-en-3-yl)carbamate (**3ap**) was obtained in 57% yield (78.2mg) as a colorless oil. <sup>1</sup>H NMR (400 MHz, CDCl<sub>3</sub>) δ 7.44-7.23 (m, 8H), 7.18 (d, *J* = 6.8 Hz, 2H), 5.09 (d, *J* = 9.5 Hz, 1H), 4.95-4.65 (m, 1H), 4.59 (d, *J* = 8.2 Hz, 1H), 4.38 (s, 1H), 4.27-4.02 (m, 1H), 2.38-2.27 (m, 2H), 2.23 (s, 3H), 2.00 (s, 3H), 1.78-1.59 (m, 2H), 1.40-1.20 (m, 9H); <sup>13</sup>C NMR (100 MHz, CDCl<sub>3</sub>) δ 170.5, 154.8, 140.0, 137.4, 134.3, 132.2, 129.3, 129.2, 128.9, 128.7, 128.3, 127.4, 79.5, 48.7, 48.5, 34.8, 30.1, 28.3, 22.4, 15.6; HRMS (ESI) calcd for C<sub>26</sub>H<sub>34</sub>N<sub>2</sub>NaO<sub>3</sub>S<sup>+</sup> (*M* + Na)<sup>+</sup> 477.2182, found 477.2189.

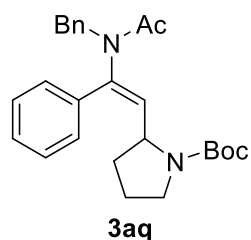

*tert*-Butyl(*E*)-2-(2-(*N*-benzylacetamido)-2-phenylvinyl)pyrrolidine-1-carboxylate (**3aq**) was obtained in 64% yield (81.1 mg) as a colorless oil. <sup>1</sup>H NMR (400 MHz, CDCl<sub>3</sub>) δ 7.42-7.16 (m, 10H), 5.13 (s, 2H), 4.48 (s, 1H), 3.82 (d, *J* = 14.2 Hz, 1H), 3.41-3.26 (m, 2H), 2.28 (s, 3H), 2.12-2.03 (m, 1H), 1.79-1.64 (m, 2H), 1.56-1.48 (m, 1H), 1.41-1.13 (m, 9H); <sup>13</sup>C NMR (100 MHz, CDCl<sub>3</sub>) δ 171.3, 170.6, 154.4, 154.1, 138.1, 137.6, 134.7, 134.4, 133.7, 129.4, 129.1, 128.8, 128.6, 128.2, 127.3, 79.6, 79.0, 54.6, 48.7, 46.7, 46.4, 33.4, 33.0, 28.4, 24.2, 23.4, 22.3; HRMS (ESI) calcd for C<sub>26</sub>H<sub>32</sub>N<sub>2</sub>NaO<sub>3</sub><sup>+</sup> (*M* + Na)<sup>+</sup> 443.2305, found 443.2324.

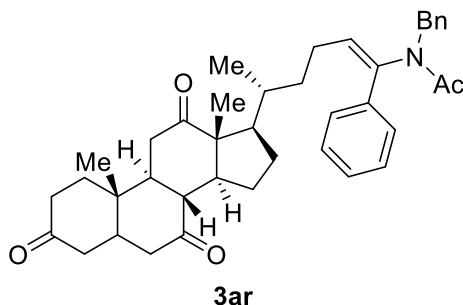

*N*-benzyl-*N*-((6*R*,*E*)-6-((8*R*,9*S*,10*S*,13*R*,14*S*,17*R*)-10,13-dimethyl-3,7,12-trioxohexadecahydro-1*H*-cyclopenta[*a*]phenanthren-17-yl)-1-phenylhept-1-en-1-yl)acetamide (**3ar**) was obtained in 82% yield (150.2 mg) as a colorless oil. <sup>1</sup>H NMR (400 MHz, CDCl<sub>3</sub>) δ 7.42-7.33 (m, 3H), 7.28-7.18 (m, 7H), 5.28 (t, *J* = 7.7 Hz, 1H),

4.61 (d,  $J = 14.3$  Hz, 1H), 4.35 (d,  $J = 14.3$  Hz, 1H), 2.95-2.79 (ddd,  $J = 36.7, 18.9, 9.3$  Hz, 3H), 2.38 -1.76 (m, 19H), 1.61 (td,  $J = 14.4, 4.7$  Hz, 1H), 1.44 -1.37 (m, 4H), 1.19 -1.10 (m, 3H), 1.01 (s, 3H), 0.72 (d,  $J = 6.0$  Hz, 3H);  $^{13}\text{C}$  NMR (100 MHz,  $\text{CDCl}_3$ )  $\delta$  212.0, 209.2, 208.8, 170.8, 138.2, 137.6, 135.0, 132.9, 129.0, 128.6, 128.6, 128.5, 128.2, 127.1, 56.8, 51.8, 49.0, 48.9, 46.8, 45.6, 45.5, 45.0, 42.8, 38.6, 36.5, 36.0, 35.6, 35.2, 35.0, 27.8, 25.6, 25.1, 22.3, 21.9, 18.6, 11.8; HRMS (ESI) calcd for  $\text{C}_{40}\text{H}_{49}\text{NNaO}_4^+$  ( $\text{M} + \text{Na}$ ) $^+$  630.3554, found 630.3565.

## Synthetic Applications of Alkylated Enamides

### (1) Gram-scale synthesis of alkylated enamides

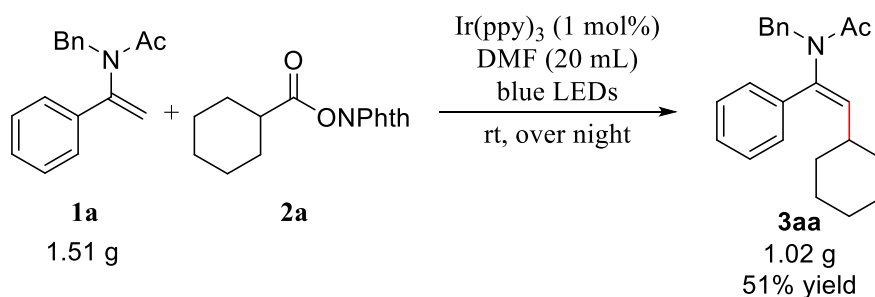

To a Schlenk tube equipped with a magnetic stir bar was charged with enamides **1a** (1.51 g, 6.0 mmol), alkyl NHP esters **2a** (1.97 g, 7.2 mmol), and  $\text{Ir}(\text{ppy})_3$  (39.3 mg, 1 mol%). The tube was sealed with a septum, evacuated and backfilled with nitrogen three times. 20.0 mL DMF was added via syringe with gentle stirring under  $\text{N}_2$  atmosphere. The tube was sealed and stirred under blue LEDs for over night. The resulting mixture was extracted with ethyl acetate. The combined organic phase was dried over anhydrous sodium sulfate, and the solvent was then removed under vacuum. The residue was purified directly by silica gel chromatography, eluting with ethyl acetate/petroleum ether (1:10), to give compound **3** in 51% yield (1.02 g).

## (2) Conversion of configuration of enamides

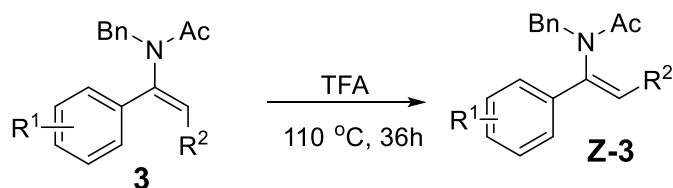

0.3 mmol (1 equiv) of the enamide **3** was dissolved in dry benzene (3.0 mL) in a screw cap vial. 171 mg (1.5 mmol, 5 equiv) of trifluoroacetic acid were added to the solution and the vial was heated at 110 °C for 36 h. The solution was concentrated in vacuum and the product was isolated through flash column chromatography (hexane/ethyl acetate) to furnish **Z-3**.

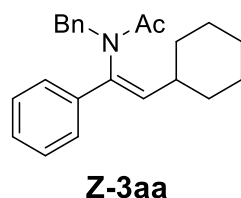

(*Z*)-*N*-benzyl-*N*-(2-cyclohexyl-1-phenylvinyl)acetamide (**Z-3aa**) was obtained in 45% yield (45.2 mg) as a colorless oil. <sup>1</sup>H NMR (400 MHz, CDCl<sub>3</sub>)  $\delta$  7.39-7.30 (m, 5H), 7.29-7.20 (m, 5H), 5.77 (d,  $J$  = 10.6 Hz, 1H), 5.52 (d,  $J$  = 14.0 Hz, 1H), 3.61 (d,  $J$  = 14.0 Hz, 1H), 2.12 (s, 3H), 1.90-1.78 (m, 1H), 1.68-1.50 (m, 3H), 1.36-1.31 (m, 1H), 1.20-0.93 (m, 3H), 0.82-0.69 (m, 1H), 0.67-0.55 (m, 1H), 0.12 (dpd,  $J$  = 10.4, 3.5, 2.3, 1.8 Hz, 1H); <sup>13</sup>C NMR (100 MHz, CDCl<sub>3</sub>)  $\delta$  171.5, 137.8, 136.5, 136.4, 136.0, 129.9, 129.0, 128.4, 128.3, 127.5, 125.7, 49.4, 37.6, 32.5, 31.5, 25.9, 25.6, 21.4; HRMS (ESI) calcd for C<sub>23</sub>H<sub>28</sub>NO<sup>+</sup> ( $M + H$ )<sup>+</sup> 334.2165, found 334.2160.

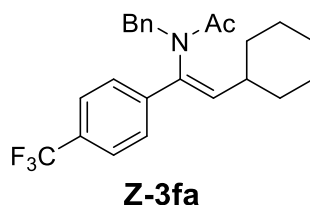

(*Z*)-*N*-benzyl-*N*-(2-cyclohexyl-1-(4-(trifluoromethyl)phenyl)vinyl)acetamide (**Z-3fa**) was obtained in 42% yield (50.5 mg) as a colorless oil. <sup>1</sup>H NMR (400 MHz, CDCl<sub>3</sub>)  $\delta$  7.72-7.56 (m, 2H), 7.43-7.39 (m, 2H), 7.27-7.22 (m, 5H), 5.89 (d,  $J$  = 10.6 Hz, 1H), 5.46 (d,  $J$  = 14.0 Hz, 1H), 3.67 (d,  $J$  = 14.0 Hz, 1H), 2.10 (s, 3H), 1.89 (dddd,  $J$  = 14.2,

10.9, 7.2, 3.5 Hz, 1H), 1.71-1.54 (m, 3H), 1.42-1.34 (m, 1H), 1.21-0.97 (m, 3H), 0.84-0.61 (m, 2H), 0.19 (dtd,  $J = 10.8, 3.7, 1.9$  Hz, 1H);  $^{13}\text{C}$  NMR (100 MHz,  $\text{CDCl}_3$ )  $\delta$  171.3, 140.3, 138.3, 137.4, 135.6, 129.9, 128.5, 127.7, 126.0 (q,  $J = 3.7$  Hz), 125.9, 124.1 (q,  $J = 272.0$  Hz), 49.6, 37.9, 32.4, 31.4, 25.9, 25.5, 21.4;  $^{19}\text{F}$  NMR (376 MHz,  $\text{CDCl}_3$ )  $\delta$  -62.46; HRMS (ESI) calcd for  $\text{C}_{24}\text{H}_{26}\text{F}_3\text{NNaO}^+$  ( $\text{M} + \text{Na}$ ) $^+$  424.1859, found 424.1854.

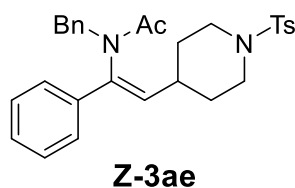

(*Z*)-*N*-benzyl-*N*-(1-phenyl-2-(1-tosylpiperidin-4-yl)vinyl)acetamide (**Z-3ae**) was obtained in 51% yield (74.8 mg) as a colorless oil.  $^1\text{H}$  NMR (400 MHz,  $\text{CDCl}_3$ )  $\delta$  7.61-7.57 (m, 2H), 7.41-7.31 (m, 7H), 7.20-7.11 (m, 5H), 5.72 (d,  $J = 10.3$  Hz, 1H), 5.55 (d,  $J = 14.0$  Hz, 1H), 3.69 (ddt,  $J = 11.6, 4.3, 2.3$  Hz, 1H), 3.45 (d,  $J = 14.0$  Hz, 1H), 3.36 (dp,  $J = 13.0, 2.5$  Hz, 1H), 2.51 (s, 7H), 2.06-1.95 (s, 4H), 1.70-1.52 (m, 3H), 1.46-1.34 (m, 1H), 1.03-0.92 (m, 1H), -0.14 (dt,  $J = 13.0, 2.9$  Hz, 1H);  $^{13}\text{C}$  NMR (100 MHz,  $\text{CDCl}_3$ )  $\delta$  171.0, 143.8, 138.2, 137.8, 135.6, 132.9, 132.4, 130.0, 129.8, 129.2, 128.8, 128.4, 127.7, 127.6, 125.8, 49.0, 45.9, 45.8, 35.3, 30.7, 29.9, 21.7, 21.2; HRMS (ESI) calcd for  $\text{C}_{29}\text{H}_{32}\text{N}_2\text{NaO}_3\text{S}^+$  ( $\text{M} + \text{Na}$ ) $^+$  511.2026, found 511.2032.

### (3) Preparation of isoquinoline derivative 7

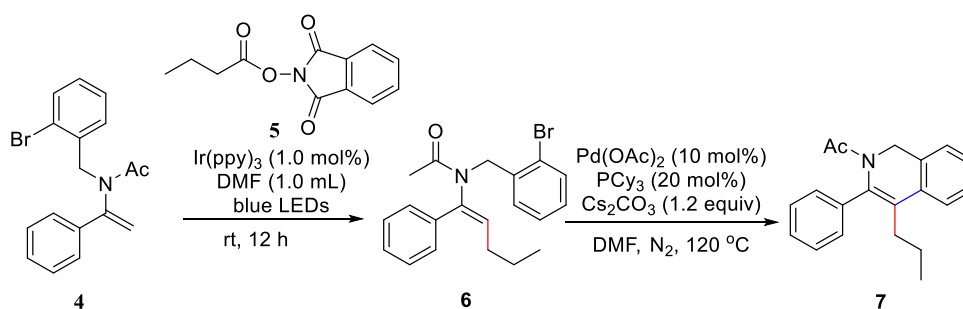

(i) To a Schlenk tube equipped with a magnetic stir bar was charged with enamide **4** (98.7 mg, 0.30 mmol), alkyl NHP ester **5** (139.9 mg, 0.6 mmol), and  $\text{Ir}(\text{ppy})_3$  (2.0 mg, 1.0 mol%). The tube was sealed with a septum, evacuated and backfilled with nitrogen three times. 1.0 mL DMF was added via syringe with gentle stirring under  $\text{N}_2$



atmosphere. The tube was sealed and stirred under blue LEDs for 12 h. The resulting mixture was extracted with ethyl acetate. The combined organic phase was dried over anhydrous sodium sulfate, and the solvent was then removed under vacuum. The residue was purified directly by silica gel chromatography, eluting with ethyl acetate/petroleum ether (1:10 v/v). (*E*)-*N*-(2-bromobenzyl)-*N*-methyl-1-phenylpent-1-en-1-amine (**6**) was obtained in 65% yield (72.0 mg) as a colorless oil. <sup>1</sup>H NMR (400 MHz, CDCl<sub>3</sub>) δ 7.47 (d, *J* = 7.9 Hz, 1H), 7.40-7.33 (m, 3H), 7.25-7.20 (m, 4H), 7.11-7.06 (m, 1H), 5.50 (t, *J* = 7.7 Hz, 1H), 4.68 (s, 2H), 2.25 (s, 3H), 2.15 (dd, *J* = 15.0, 7.5 Hz, 2H), 1.39-1.29 (m, 2H), 0.82 (t, *J* = 7.4 Hz, 3H); <sup>13</sup>C NMR (100 MHz, CDCl<sub>3</sub>) δ 171.3, 138.6, 136.7, 135.0, 133.0, 132.7, 130.9, 128.8, 128.8, 128.6, 128.6, 127.4, 124.1, 49.3, 30.7, 22.7, 22.4, 13.9; HRMS (ESI) calcd for C<sub>20</sub>H<sub>22</sub>BrNNaO<sup>+</sup> (*M* + Na)<sup>+</sup> 394.0777, found 394.0785.

(ii) To a Schlenk tube equipped with a magnetic stir bar was charged with enamide **6** (74.4 mg, 0.20 mmol), Pd(OAc)<sub>2</sub> (4.6 mg, 10 mol%), tricyclohexylphosphane (11.2 mg, 20 mol%), and Cs<sub>2</sub>CO<sub>3</sub> (78.3 mg, 1.2 equiv). The tube was sealed with a septum, evacuated and backfilled with nitrogen three times. 2.0 mL DMF was added *via* syringe with gentle stirring under N<sub>2</sub> atmosphere. And the vial was heated at 120 °C under the atmosphere of N<sub>2</sub> for 24 h. The solution was diluted by ethyl acetate, washed by ammonium chloride saturated solution. The organic layer was concentrated in vacuum and the product was isolated through flash column chromatography (hexane/ethyl acetate = 8:1) to furnish the related product **7**.

1-(3-phenyl-4-propylisoquinolin-2(1*H*)-yl)ethan-1-one **7** was obtained in 76% yield (44.3 mg) as a colorless oil. <sup>1</sup>H NMR (400 MHz, CDCl<sub>3</sub>) δ 7.43-7.23 (m, 9H), 4.98 (s, 2H), 2.73 (t, *J* = 7.4 Hz, 2H), 1.49-1.35 (m, 5H), 0.69 (t, *J* = 7.4 Hz, 3H); <sup>13</sup>C NMR (100 MHz, CDCl<sub>3</sub>) δ 171.3, 137.9, 135.9, 134.7, 133.5, 130.3, 128.5, 128.1, 127.8, 127.5, 125.4, 124.1, 46.3, 29.8, 24.3, 22.6, 13.5; HRMS (ESI) calcd for C<sub>20</sub>H<sub>21</sub>NNaO<sup>+</sup> (*M* + Na)<sup>+</sup> 314.1515, found 314.1528.

#### (4) Hydrogenation of enamide 3aa

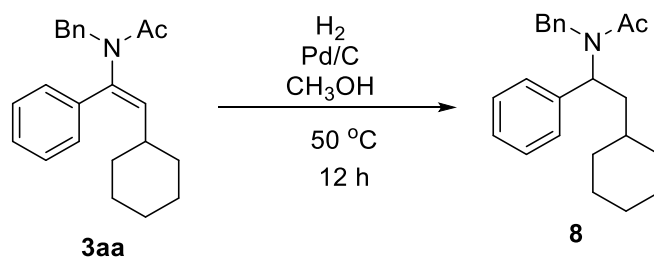

(*E*)-*N*-benzyl-*N*-(2-cyclohexyl-1-phenylvinyl)acetamide (**3aa**) (1.0 g) in methanol (15 ml) was hydrogenated at 50 °C and room pressure in the presence of palladium-charcoal (0.1 g) for 12 h. Upon completion, the solvent was then removed under vacuum. The residue was purified directly by silica gel chromatography, eluting with ethyl acetate/petroleum ether (1:10 v/v). *N*-benzyl-*N*-(2-cyclohexyl-1-phenylethyl)acetamide **8** was obtained in 69% yield (0.69 g) as a colorless oil. <sup>1</sup>H NMR (400 MHz, CDCl<sub>3</sub>) for two conformers: δ 7.37-7.11 (m, 9H), 6.95 (d, *J* = 6.9 Hz, 1H), 6.13 and 5.07 (2×t, *J* = 7.7 Hz, 1H), 4.91 and 3.39 (2×d, *J* = 15.3 Hz, 1H), 4.25 and 3.84 (2×d, *J* = 17.7 Hz, 1H), 2.36 and 2.02 (2×s, 3H), 1.86-1.51 and 1.23-0.77 (2×m, 13H); <sup>13</sup>C NMR (100 MHz, CDCl<sub>3</sub>) for two conformers: δ 171.9, 171.5, 140.3, 139.8, 139.4, 138.2, 128.8, 128.6, 128.5, 128.1, 127.8, 127.6, 127.6, 127.0, 126.7, 126.1, 59.0, 53.8, 47.9, 45.9, 39.5, 38.4, 34.5, 34.0, 33.5, 33.5, 33.3, 33.2, 26.6, 26.4, 26.3, 26.2, 25.9, 25.6, 22.9, 22.6; HRMS (ESI) calcd for C<sub>23</sub>H<sub>30</sub>NO<sup>+</sup> (*M* + *H*)<sup>+</sup> 336.2322, found 336.2333.

#### (5) Hydrolysis of enamides

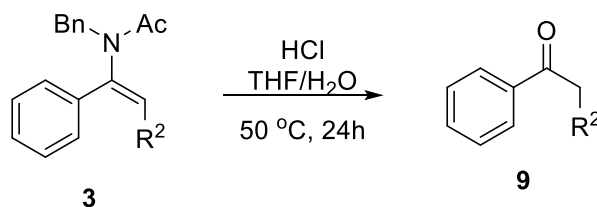

Enamides **3** (0.3 mmol) was added into a tube. Then THF (1 mL) and concentrated hydrochloric acid (1 mL) were added sequentially by syringe. The resulting mixture was stirred at 50 °C for 24 hours as monitored by TLC. Upon completion, the solvent

was then removed under vacuum. The residue was purified directly by silica gel chromatography, eluting with ethyl acetate/petroleum ether (1:100~1:10 v/v).

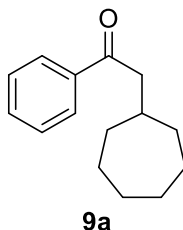

2-Cycloheptyl-1-phenylethan-1-one (**9a**) was obtained in 95% yield (61.7 mg) as a colorless oil.  $^1\text{H}$  NMR (400 MHz,  $\text{CDCl}_3$ )  $\delta$  7.97-7.93 (m, 2H), 7.57-7.52 (m, 1H), 7.48-7.43 (m, 2H), 2.87 (d,  $J = 6.9$  Hz, 2H), 2.27-2.16 (m, 1H), 1.79-1.72 (m, 2H), 1.68-1.44 (m, 8H), 1.32-1.23 (m, 2H);  $^{13}\text{C}$  NMR (100 MHz,  $\text{CDCl}_3$ )  $\delta$  200.6, 137.6, 133.0, 128.7, 128.3, 46.9, 36.1, 35.0, 28.5, 26.4; HRMS (ESI) calcd for  $\text{C}_{15}\text{H}_{21}\text{O}^+$  ( $\text{M} + \text{H}$ ) $^+$  217.1587, found 217.1590.

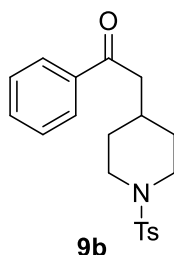

1-Phenyl-2-(1-tosylpiperidin-4-yl)ethan-1-one (**9b**) was obtained in 86% yield (92.2 mg) as a colorless oil.  $^1\text{H}$  NMR (400 MHz,  $\text{CDCl}_3$ )  $\delta$  7.93-7.89 (m, 2H), 7.64 (d,  $J = 8.3$  Hz, 2H), 7.59-7.53 (m, 1H), 7.45 (t,  $J = 7.6$  Hz, 2H), 7.32 (d,  $J = 8.0$  Hz, 2H), 3.78 (d,  $J = 11.6$  Hz, 2H), 2.87 (d,  $J = 6.6$  Hz, 2H), 2.44 (s, 3H), 2.28 (td,  $J = 12.0, 2.4$  Hz, 2H), 1.99-1.88 (m, 1H), 1.82 (d,  $J = 12.7$  Hz, 2H), 1.40 (qd,  $J = 12.4, 4.0$  Hz, 2H);  $^{13}\text{C}$  NMR (100 MHz,  $\text{CDCl}_3$ )  $\delta$  198.9, 143.6, 137.1, 133.4, 133.1, 129.7, 128.8, 128.1, 127.9, 46.5, 44.6, 31.7, 31.5, 21.7; HRMS (ESI) calcd for  $\text{C}_{20}\text{H}_{24}\text{NO}_3\text{S}^+$  ( $\text{M} + \text{H}$ ) $^+$  358.1471, found 358.1470.

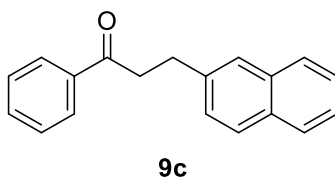

2-(Naphthalen-2-yl)-1-phenylethan-1-one (**9c**) was obtained in 92% yield (71.7 mg) as a colorless oil.  $^1\text{H}$  NMR (400 MHz,  $\text{CDCl}_3$ )  $\delta$  7.97 (d,  $J = 7.7$  Hz, 2H), 7.85-

7.75 (m, 3H), 7.69 (s, 1H), 7.58-7.52 (m, 1H), 7.49-7.37 (m, 5H), 3.44-3.35 (m, 2H), 3.28-3.19 (m, 2H);  $^{13}\text{C}$  NMR (100 MHz,  $\text{CDCl}_3$ )  $\delta$  199.3, 138.9, 136.9, 133.7, 133.2, 132.2, 128.8, 128.3, 128.2, 127.8, 127.6, 127.3, 126.6, 126.2, 125.5, 40.5, 30.4; HRMS (ESI) calcd for  $\text{C}_{19}\text{H}_{17}\text{O}^+$  ( $\text{M} + \text{H}$ ) $^+$  261.1274, found 261.1284.

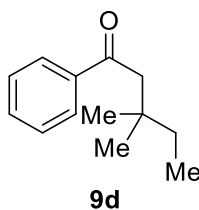

3,3-Dimethyl-1-phenylpentan-1-one (**9d**) was obtained in 89% yield (50.8 mg) as a colorless oil.  $^1\text{H}$  NMR (400 MHz,  $\text{CDCl}_3$ )  $\delta$  7.96-7.92 (m, 2H), 7.57-7.52 (m, 1H), 7.48-7.43 (m, 2H), 2.85 (s, 2H), 1.44 (q,  $J = 7.5$  Hz, 2H), 1.01 (s, 6H), 0.87 (t,  $J = 7.5$  Hz, 3H);  $^{13}\text{C}$  NMR (100 MHz,  $\text{CDCl}_3$ )  $\delta$  200.9, 138.9, 132.8, 128.6, 128.3, 47.8, 35.1, 34.3, 27.3, 8.7; HRMS (ESI) calcd for  $\text{C}_{13}\text{H}_{19}\text{O}^+$  ( $\text{M} + \text{H}$ ) $^+$  191.1430, found 191.1410.

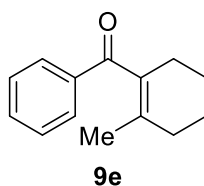

(2-Methylcyclohex-1-en-1-yl)(phenyl)methanone (**9e**) was obtained in 65% yield (38.8 mg) as a colorless oil.<sup>4</sup>  $^1\text{H}$  NMR (400 MHz,  $\text{CDCl}_3$ )  $\delta$  7.91-7.81 (m, 2H), 7.55 (ddd,  $J = 6.7, 3.9, 1.3$  Hz, 1H), 7.49-7.43 (m, 2H), 2.26-2.19 (m, 2H), 2.13-2.08 (m, 2H), 1.77-1.67 (m, 4H);  $^{13}\text{C}$  NMR (100 MHz,  $\text{CDCl}_3$ )  $\delta$  201.7, 137.1, 134.9, 133.1, 132.5, 129.4, 128.8, 31.3, 27.6, 22.7, 22.4, 21.3; HRMS (ESI) calcd for  $\text{C}_{14}\text{H}_{17}\text{O}^+$  ( $\text{M} + \text{H}$ ) $^+$  201.1274, found 201.1285.

## (6) The synthesis of $\alpha$ -acyloxyketone

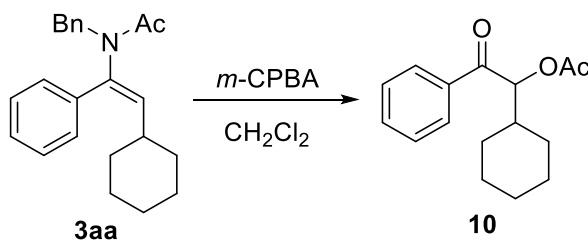

Enamide **3aa** (0.2 mmol) was added into a tube. Then *m*-CPBA (3.0 equiv) was added to the stirred solution of the enamide in CH<sub>2</sub>Cl<sub>2</sub> at 0 °C and the resultant suspension stirred for 30 min before warming to rt. The resulting mixture was stirred at rt for 24 hours as monitored by TLC. Upon completion, the solvent was then removed under vacuum. The residue was purified directly by silica gel chromatography, eluting with ethyl acetate/petroleum ether (1:50 v/v). 1-cyclohexyl-2-oxo-2-phenylethyl acetate (**10**) was obtained in 75% yield (39.0 mg) as a colorless oil.<sup>5</sup> <sup>1</sup>H NMR (400 MHz, CDCl<sub>3</sub>) δ 7.96 (d, *J* = 7.4 Hz, 2H), 7.59 (t, *J* = 7.4 Hz, 1H), 7.48 (t, *J* = 7.6 Hz, 2H), 5.72 (d, *J* = 5.2 Hz, 1H), 2.16 (s, 3H), 1.97-1.88 (m, 1H), 1.74-1.61 (m, 5H), 1.26-1.10 (m, 5H); <sup>13</sup>C NMR (100 MHz, CDCl<sub>3</sub>) δ 197.0, 171.0, 135.9, 133.6, 128.9, 128.6, 79.1, 39.8, 29.9, 27.7, 26.2, 26.1, 26.0, 20.8; HRMS (ESI) calcd for C<sub>16</sub>H<sub>21</sub>O<sub>3</sub><sup>+</sup> (*M* + *H*)<sup>+</sup> 261.1485, found 261.1482.

#### (7) Cleavage of *N*-Boc Protecting Group<sup>6</sup>

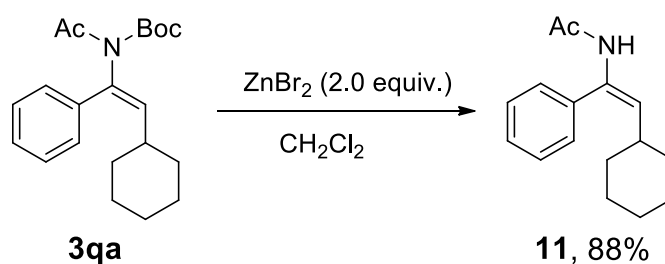

Enamides **3qa** (68.7 mg, 0.2 mmol) was added into a reaction tube. Then, ZnBr<sub>2</sub> (90.1 mg, 0.4 mmol) and DCM (1 mL) were added sequentially. The resulting mixture was stirred at room temperature for 2 hours as monitored by TLC. Upon completion, the solvent was then removed under vacuum. The residue was purified directly by silica gel chromatography, eluting with ethyl acetate/petroleum ether (1:4 v/v). (*E*)-*N*-(2-cyclohexyl-1-phenylvinyl)acetamide **11** was obtained in 88% yield (42.8 mg) as a colorless oil. <sup>1</sup>H NMR (400 MHz, CDCl<sub>3</sub>) δ 7.40-7.28 (m, 5H), 6.56 (s, br, 1H), 6.17 (d, *J* = 10.5 Hz, 1H), 2.06-1.97 (m, 4H), 1.71-1.53 (m, 5H), 1.23-1.09 (m, 5H); <sup>13</sup>C NMR (100 MHz, CDCl<sub>3</sub>) δ 168.5, 137.6, 132.4, 128.7, 128.6, 128.2, 125.8, 37.2, 33.8, 26.0, 25.8, 24.6. HRMS (ESI) calcd for C<sub>16</sub>H<sub>22</sub>NO<sup>+</sup> (*M* + *H*)<sup>+</sup> 244.1696, found 244.1696.

## Preliminary Mechanistic Studies

### (1) Radical-trapping experiment

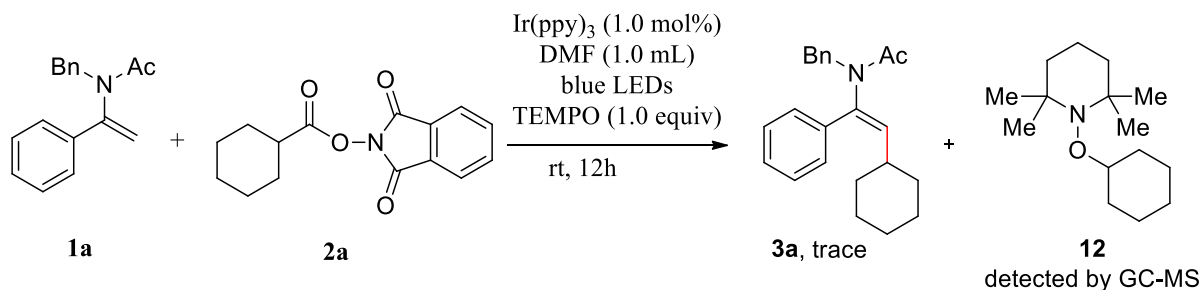

To a Schlenk tube equipped with a magnetic stir bar was charged with enamide **1a** (75.4 mg, 0.30 mmol), alkyl NHP ester **2a** (98.3 mg, 0.36 mmol), TEMPO (46.9 mg, 0.3 mmol), and  $\text{Ir(ppy)}_3$  (2.0 mg, 1.0 mol%). The tube was sealed with a septum, evacuated and backfilled with nitrogen three times. 1.0 mL DMF was added via syringe with gentle stirring under  $\text{N}_2$  atmosphere. The tube was sealed and stirred under blue LEDs for 12 h. The adduct **12** of TEMPO and alkyl radical from decarboxylation of NHP ester **2a** was detected by GC-MS: 239.22. There was trace corresponding **3a** detected.

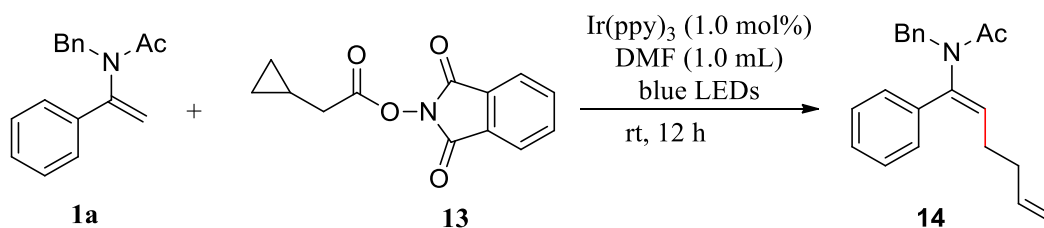

To a Schlenk tube equipped with a magnetic stir bar was charged with enamide **1a** (75.4 mg, 0.30 mmol), alkyl NHP ester **13** (147.1 mg, 0.6 mmol), and  $\text{Ir(ppy)}_3$  (2.0 mg, 1.0 mol%). The tube was sealed with a septum, evacuated and backfilled with nitrogen three times. 1.0 mL DMF was added via syringe with gentle stirring under  $\text{N}_2$  atmosphere. The tube was sealed and stirred under blue LEDs for 12 h. The resulting mixture was extracted with ethyl acetate. The combined organic phase was dried over anhydrous sodium sulfate, and the solvent was then removed under vacuum. The residue was purified directly by silica gel chromatography, eluting with ethyl acetate/petroleum ether (1:10 v/v). (*E*)-*N*-benzyl-*N*-(1-phenylhexa-1,5-dien-1-yl)

acetamide **14** was obtained in 54% yield (49.5 mg) as a colorless oil.  $^1\text{H}$  NMR (400 MHz,  $\text{CDCl}_3$ )  $\delta$  7.34-7.27 (m, 3H), 7.21-7.10 (m, 7H), 5.61-5.50 (m, 1H), 5.23 (t,  $J$  = 7.6 Hz, 1H), 4.86-4.80 (dd,  $J$  = 11.9, 6.0 Hz, 2H), 4.40 (br, s, 2H), 2.21 (q,  $J$  = 7.3 Hz, 2H), 2.14 (s, 3H), 1.97 (q,  $J$  = 6.9 Hz, 2H);  $^{13}\text{C}$  NMR (100 MHz,  $\text{CDCl}_3$ )  $\delta$  171.0, 138.7, 137.7, 137.4, 135.0, 132.1, 129.1, 128.7, 128.7, 128.6, 128.3, 127.2, 115.7, 49.1, 33.4, 27.9, 22.5; HRMS (ESI) calcd for  $\text{C}_{21}\text{H}_{23}\text{NNaO}^+$  ( $\text{M} + \text{Na}$ ) $^+$  328.1672, found 328.1693. No cyclopropylmethyl substituted enamide was detected in this reaction.

## (2) Quantum yield measurement

In order to determine whether a radical-chain reaction is involved, the quantum yield measurement was conducted, which gives the quantum yield ( $\Phi$ ) of the photoreaction of 0.71, implying that the reaction is highly possible to proceed in a photoredox catalytic pathway rather than a radical-chain mechanism.

The actinometry measurements were done as follows based on previous literature<sup>7</sup>:

(i) The actinometry measurements were determined by standard ferrioxalate actinometry. A solution of ferrioxalate was prepared by dissolving 73.7 mg of potassium ferrioxalate hydrate and 67  $\mu\text{L}$  of concentrated sulfuric acid in a 25 mL volumetric flask and filled to the mark with water (HPLC grade). A buffered solution of phenanthroline was prepared by dissolving 25.0 mg of phenanthroline, 5.2 g of sodium acetate and 0.56 mL of concentrated sulfuric acid in a 50 mL volumetric flask and filled to the mark with water (HPLC grade). Both solutions were stored in the dark.

(ii) The actinometry solutions ( $V_1$ , 1mL) were irradiated with 15 W blue LEDs for specified time intervals (30 s, 60 s, 90 s, 120 s, and 150 s). After irradiation, 40  $\mu\text{L}$  ( $V_2$ ) of the actionmeter solutions were removed and placed in 10 mL ( $V_3$ ) volumetric flasks. 1.5 mL of buffered solutions were added to these flasks and filled to the mark with water (HPLC grade). The UV-Vis spectra of actinometry samples were recorded for each time interval. The absorbance of the actinometry solutions were monitored at 510 nm. A non-irradiated sample was also prepared and the absorbance at 510 nm measured

in cuvette ( $l = 1\text{ cm}$ ).  $\epsilon$  is the molar absorptivity at 510 nm ( $11,100\text{ L mol}^{-1}\text{ cm}^{-1}$ ). Based on the data, we got the graph (**Fig.1b**) between the number of moles of products (y axis) and time (x axis).

$$\begin{aligned}\text{mol Fe}^{2+} &= \frac{V_1 \times V_3 \times \Delta A (510\text{ nm})}{10^3 \times V_2 \times l \times \epsilon (510\text{ nm})} = \frac{1\text{ mL} \times 10\text{ mL} \times \Delta A (510\text{ nm})}{10^3 \times (40 \times 10^{-3}\text{ mL}) \times 1\text{ cm} \times 11100} \\ &= \frac{\Delta A (510\text{ nm})}{44400} = 2.1997 \times 10^{-8}\end{aligned}$$

The quantum yield for  $\text{Fe}^{2+}$  ( $\Phi_{\text{Fe}^{2+}} = 1.13$ ),  $F = \text{mol Fe}^{2+} / \Phi_{\text{Fe}^{2+}}$ . Then, the irradiated light intensity was estimated to  $1.95 \times 10^{-8}\text{ einstein S}^{-1}$  by using  $\text{K}_3[\text{Fe}(\text{C}_2\text{O}_4)_3]$  as an actinometer.

(iii) For five clean tubes, according to the general procedure, the 0.3 mmol scale model reaction solution was irradiated with 15 W blue LEDs for specified time intervals (30 min, 60 min, 90 min, 120 min and 150 min). The moles of products formed were determined by  $^1\text{H}$  NMR yield with mesitylene as reference standard. The number of moles of products (y axis) per unit time is related to the number of photons (x axis, calculated from the light intensity) (**Fig.1c**). The slope gives the quantum yield ( $\Phi$ ) of the photoreaction, 0.71.

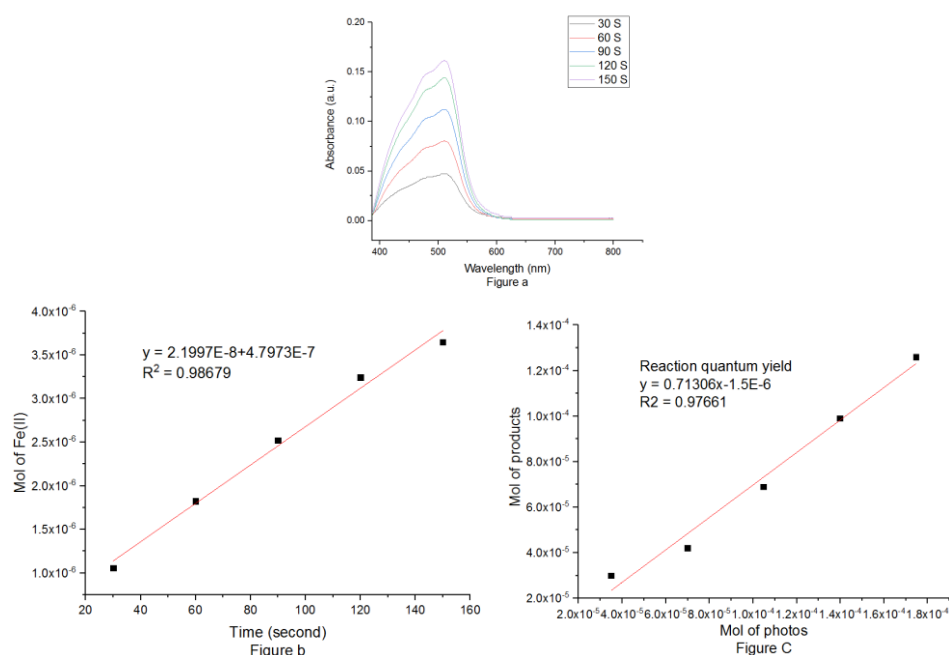

**Figure 1.** The UV-Vis spectra and data of quantum yield measurement.



### (3) $^1\text{H}$ NMR evidence for the stereoselectivity of the model reaction

#### $^1\text{H}$ NMR of the *Z*-configured enamides:

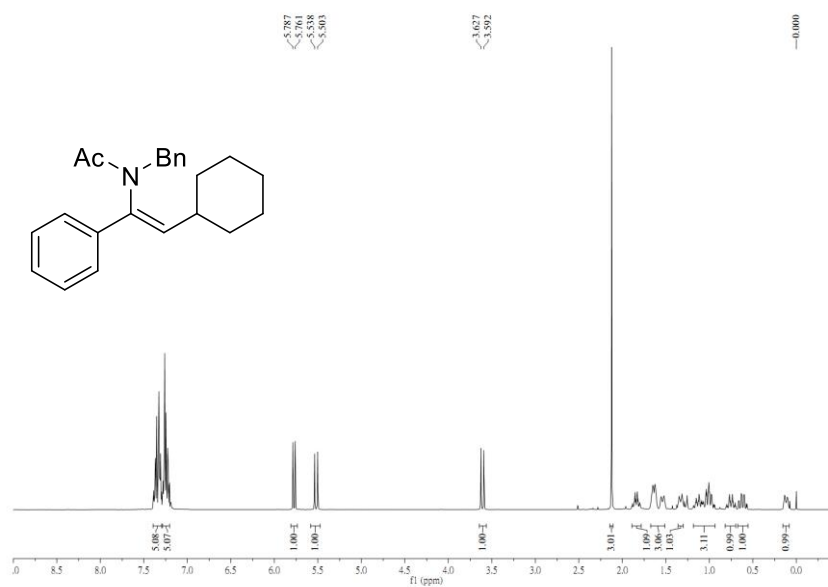

#### $^1\text{H}$ NMR of the *E*-configured enamides:

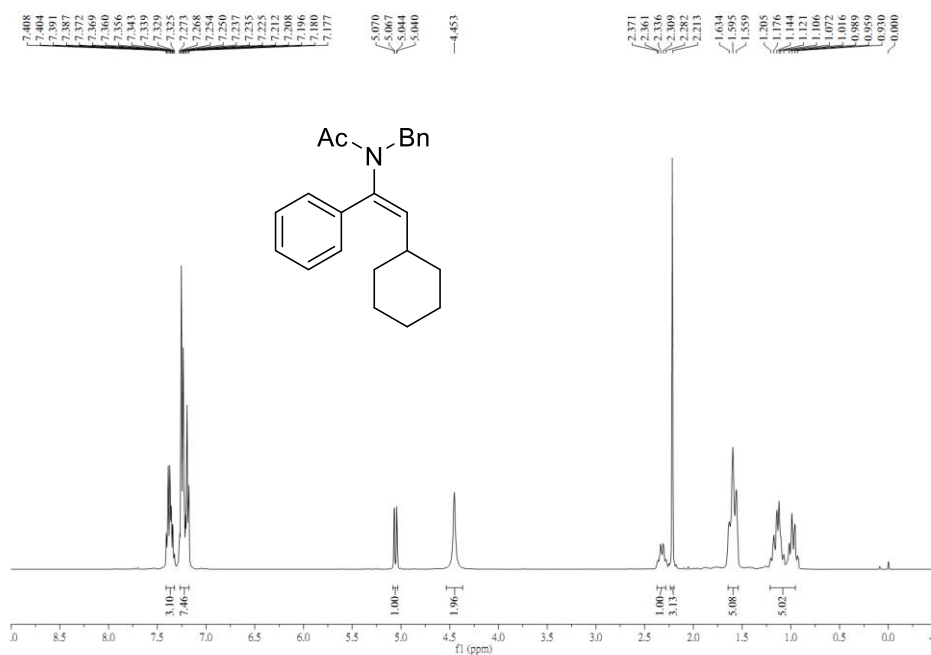

### Crude $^1\text{H}$ NMR spectrum of reaction system:

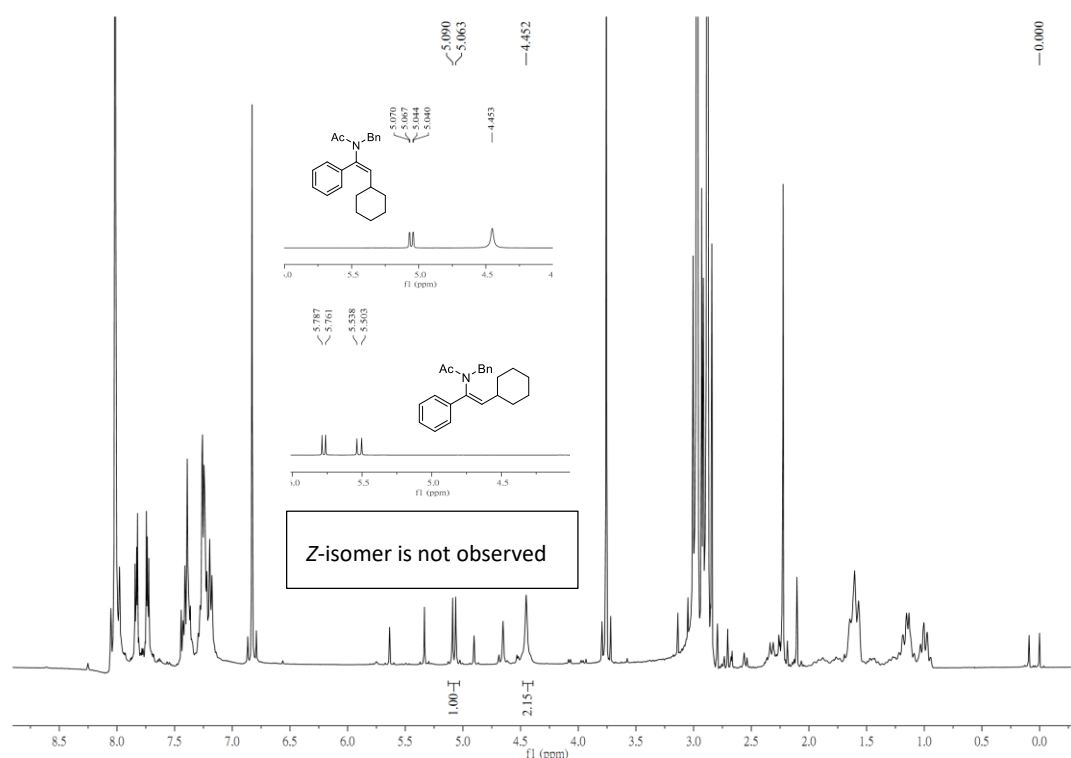

No Z-isomer was observed in Crude  $^1\text{H}$  NMR spectrum of reaction system.

### Determination of stereochemistry-NOESY experiment of *E*-3aa and *Z*-3aa

(i) The *E*-stereochemistry of **3ce** was unambiguously confirmed through X-ray analysis. All other *E*-adducts **3aa-3ss**, **3ab-3ar** exhibit similar signals to **3ce** for their alkene and benzylic hydrogens in  $^1\text{H}$  NMR. Thus, the stereochemistry of the compounds in Table 2 and Table 3 were assigned as *E*-configuration. For **Z-3aa**, **Z-3fa** and **Z-3ae**, the chemical shift of the olefinic hydrogen (about 0.7 ppm shifts to the low fields) and the spin splitting of benzylic hydrogens (two doublets for *Z*-isomers vs one broad singlet for *E*-isomers).

(ii) NOESY-experiments of **E-3aa** and **Z-3aa** was performed as well to further testify the stereochemistry. It was shown that for **E-3aa**, a NOE effect between the olefinic hydrogen and the methyl of acetyl group was observed, while no NOE effect between the olefinic hydrogen and the methyl of acetyl group was observed for **Z-3aa**.

## NOESY experiment of *E*-3aa:

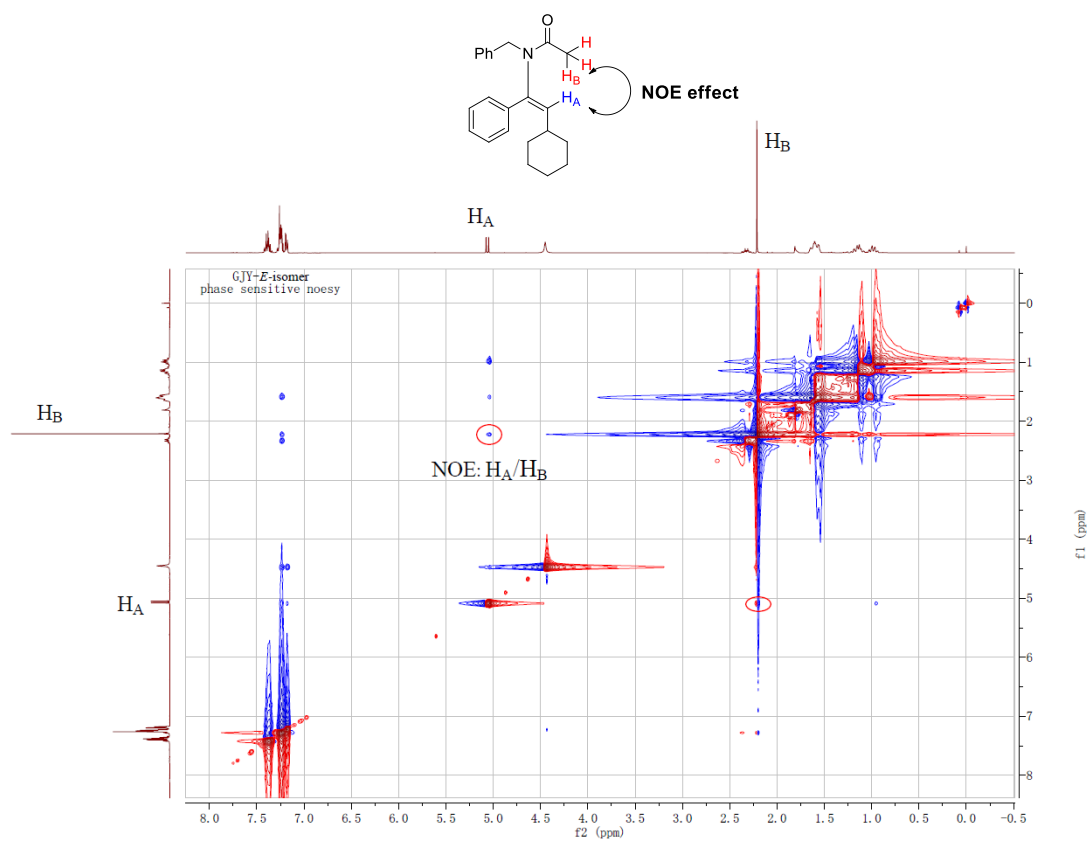

## NOESY experiment of *Z*-3aa:

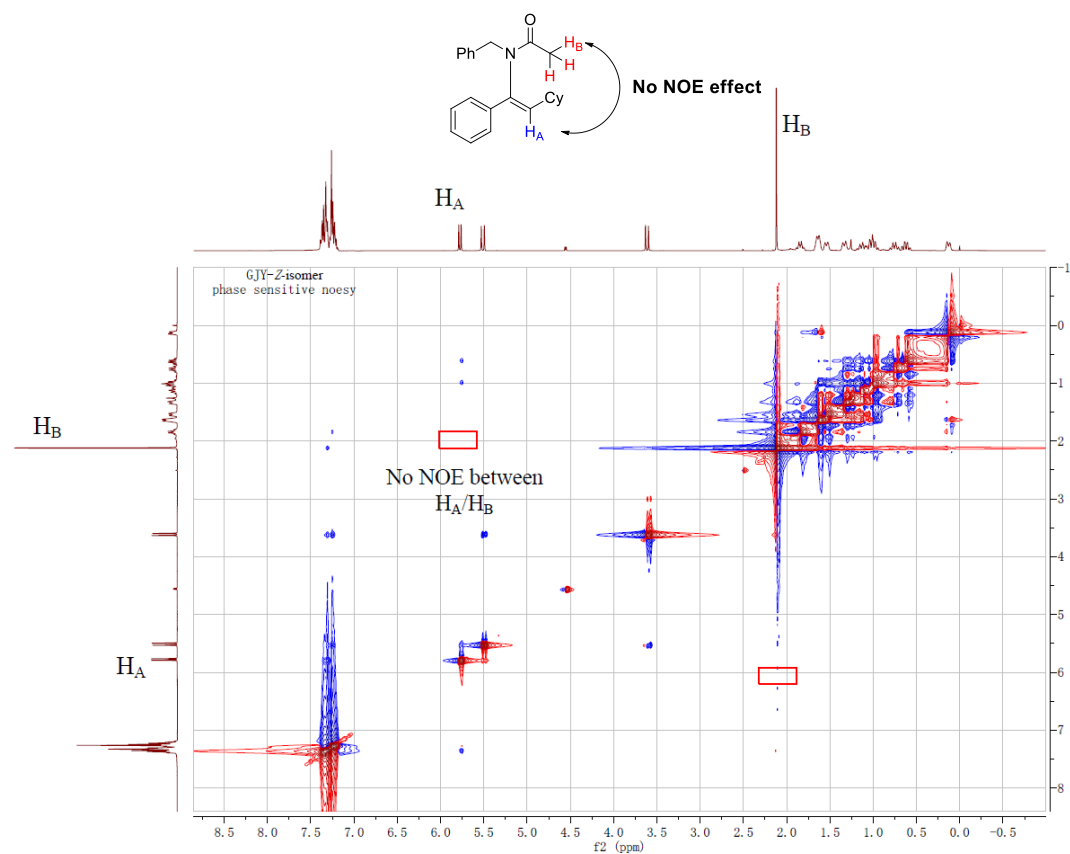

## References

- (1) Van den Berg, M.; Haak, R. M.; Minnaard, A. J.; de Vries, A. H. M.; de Vries, J. G.; Feringa, B. L. Rhodium/MonoPhos-Catalysed Asymmetric Hydrogenation of Enamides. *Adv. Synth. Catal.* **2002**, *344*, 1003-1007.
- (2) Pankajakshan, S.; Xu, Y.-H.; Cheng, J. K.; Low, M. T.; Loh, T.-P. Palladium-Catalyzed Direct C-H Arylation of Enamides with Simple Arenes. *Angew. Chem. Int. Ed.* **2012**, *51*, 5701-5705.
- (3) Lu, X.; Xiao, B.; Liu, L.; Fu, Y. Formation of C(sp<sup>3</sup>)-C(sp<sup>3</sup>) Bonds through Nickel-Catalyzed Decarboxylative Olefin Hydroalkylation Reactions. *Chem. Eur. J.* **2016**, *22*, 11161-11164.
- (4) Ryan, S. J.; Candish, L.; Lupton, D. W. *N*-Heterocyclic Carbene-Catalyzed (4 + 2) Cycloaddition/Decarboxylation of Silyl Dienol Ethers with  $\alpha,\beta$ -Unsaturated Acid Fluorides. *J. Am. Chem. Soc.* **2011**, *133*, 4694-4697.
- (5) Trost, B. M.; Xu, J.; Schmidt, T. Ligand Controlled Highly Regio- and Enantioselective Synthesis of  $\alpha$ -Acyloxyketones by Palladium-Catalyzed Allylic Alkylation of 1,2-Enediol Carbonates. *J. Am. Chem. Soc.* **2008**, *130*, 11852-11853.
- (6) Nigama, S. C.; Mann, A.; Taddei, M.; Wermutha, C.-G. Selective Removal of the Tert-Butoxycarbonyl Group from Secondary Amines: ZnBr<sub>2</sub> as the Deprotecting Reagent. *Synth. Commun.* **1989**, *19*, 3139-3142.
- (7) Cismesiaa, M. A.; Yoon, T. P. Characterizing Chain Processes in Visible Light Photoredox Catalysis. *Chem. Sci.* **2015**, *6*, 5426-5434.

# Copies of $^1\text{H}$ NMR, $^{13}\text{C}$ NMR, and $^{19}\text{F}$ NMR Spectra

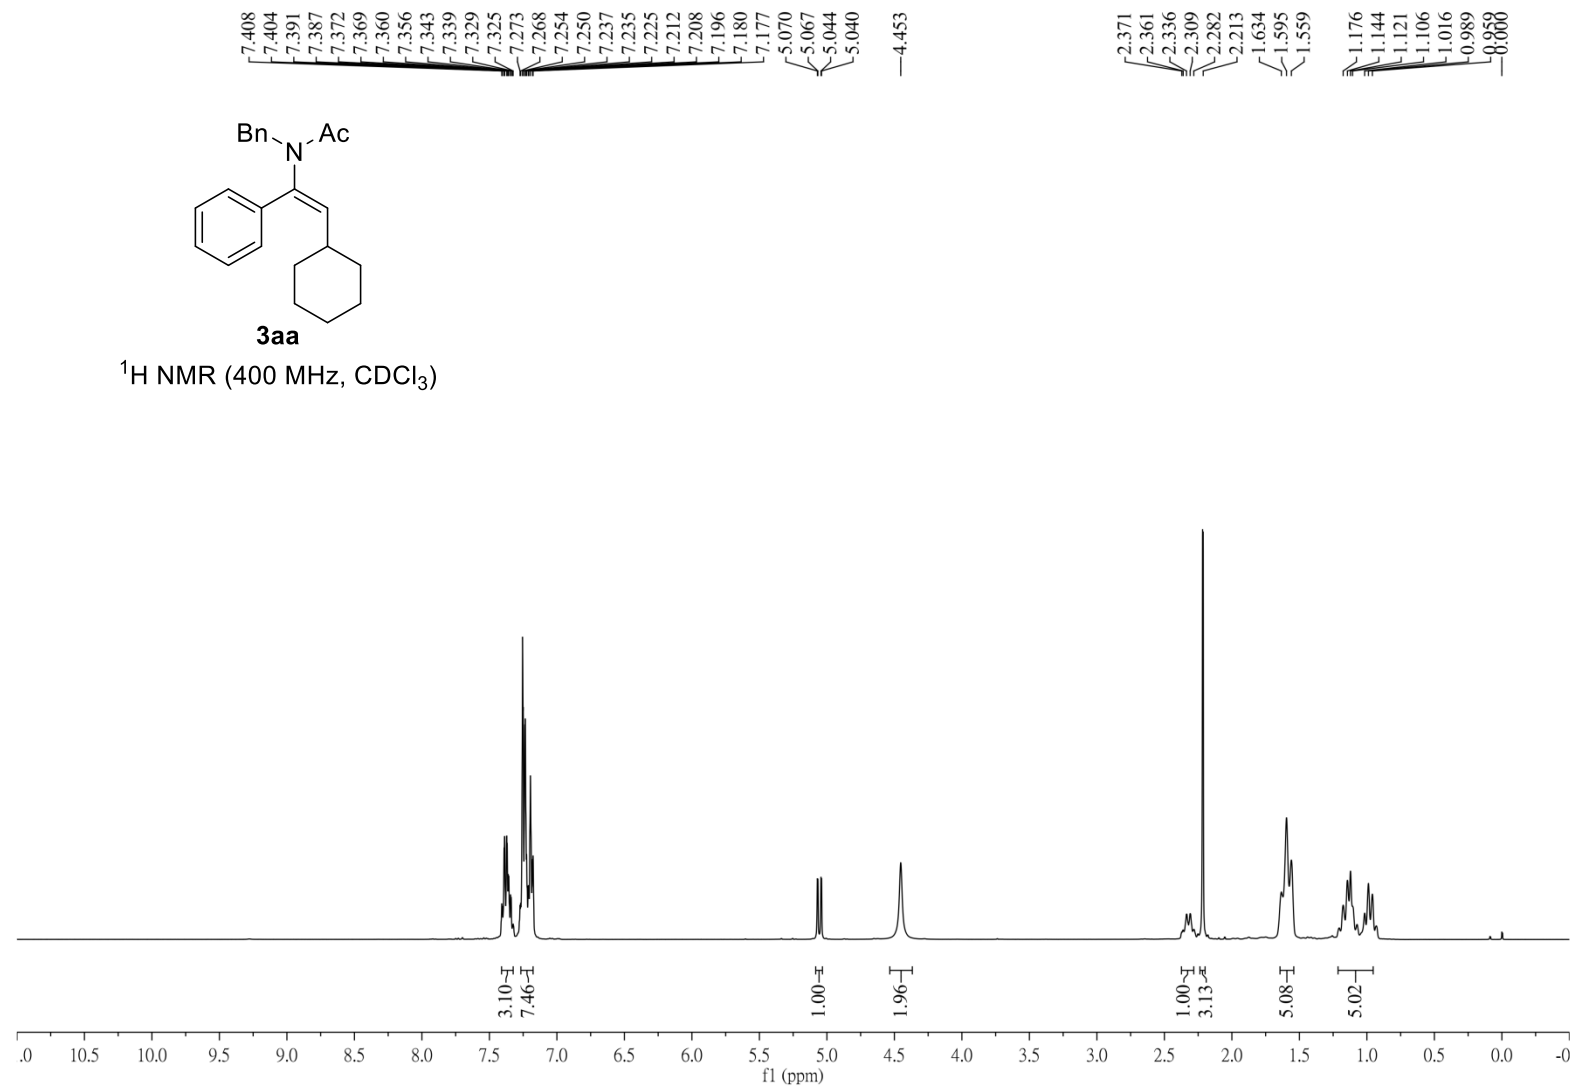

—170.642

138.614  
137.535  
136.486  
135.376  
129.242  
128.624  
128.447  
128.095  
127.146

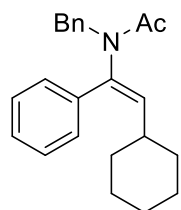

**3aa**

$^{13}\text{C}$  NMR (100 MHz,  $\text{CDCl}_3$ )

—77.160

—48.775

—37.084

—32.531

25.767

25.251

22.251

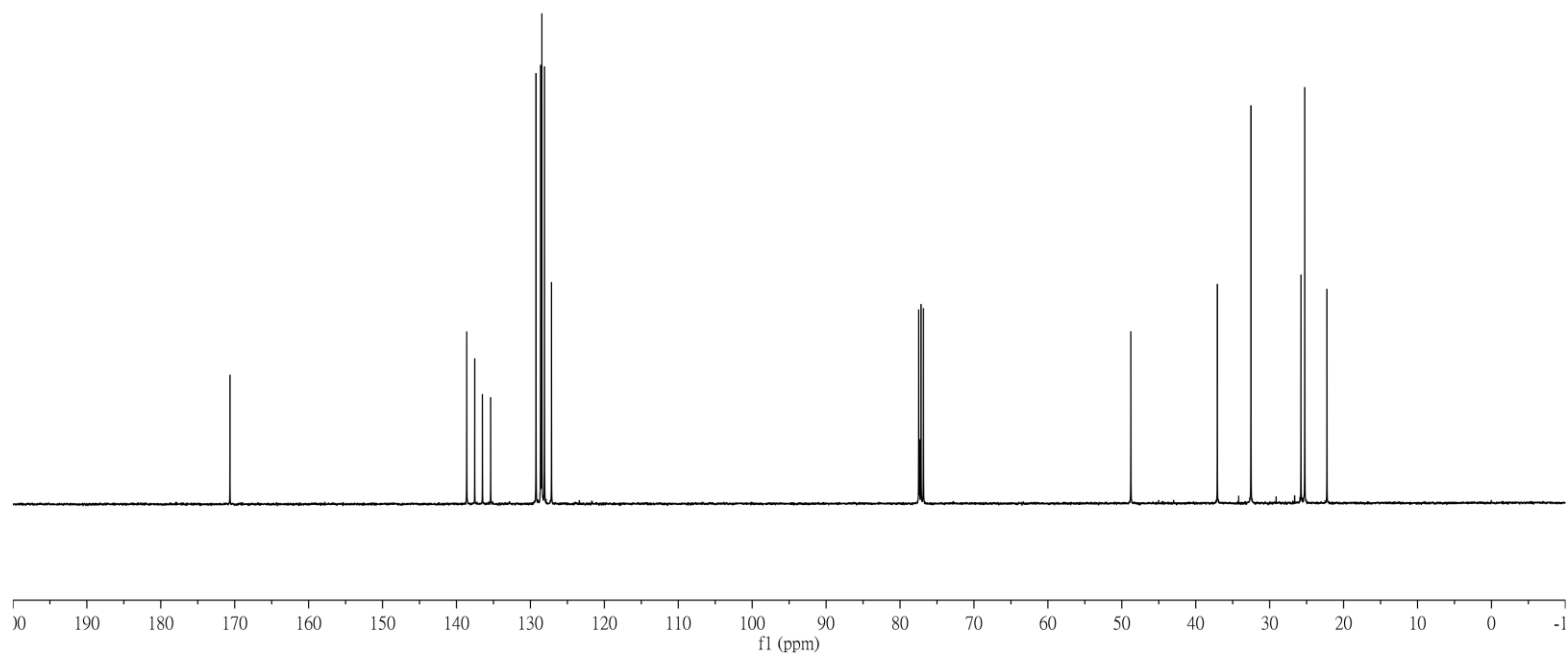

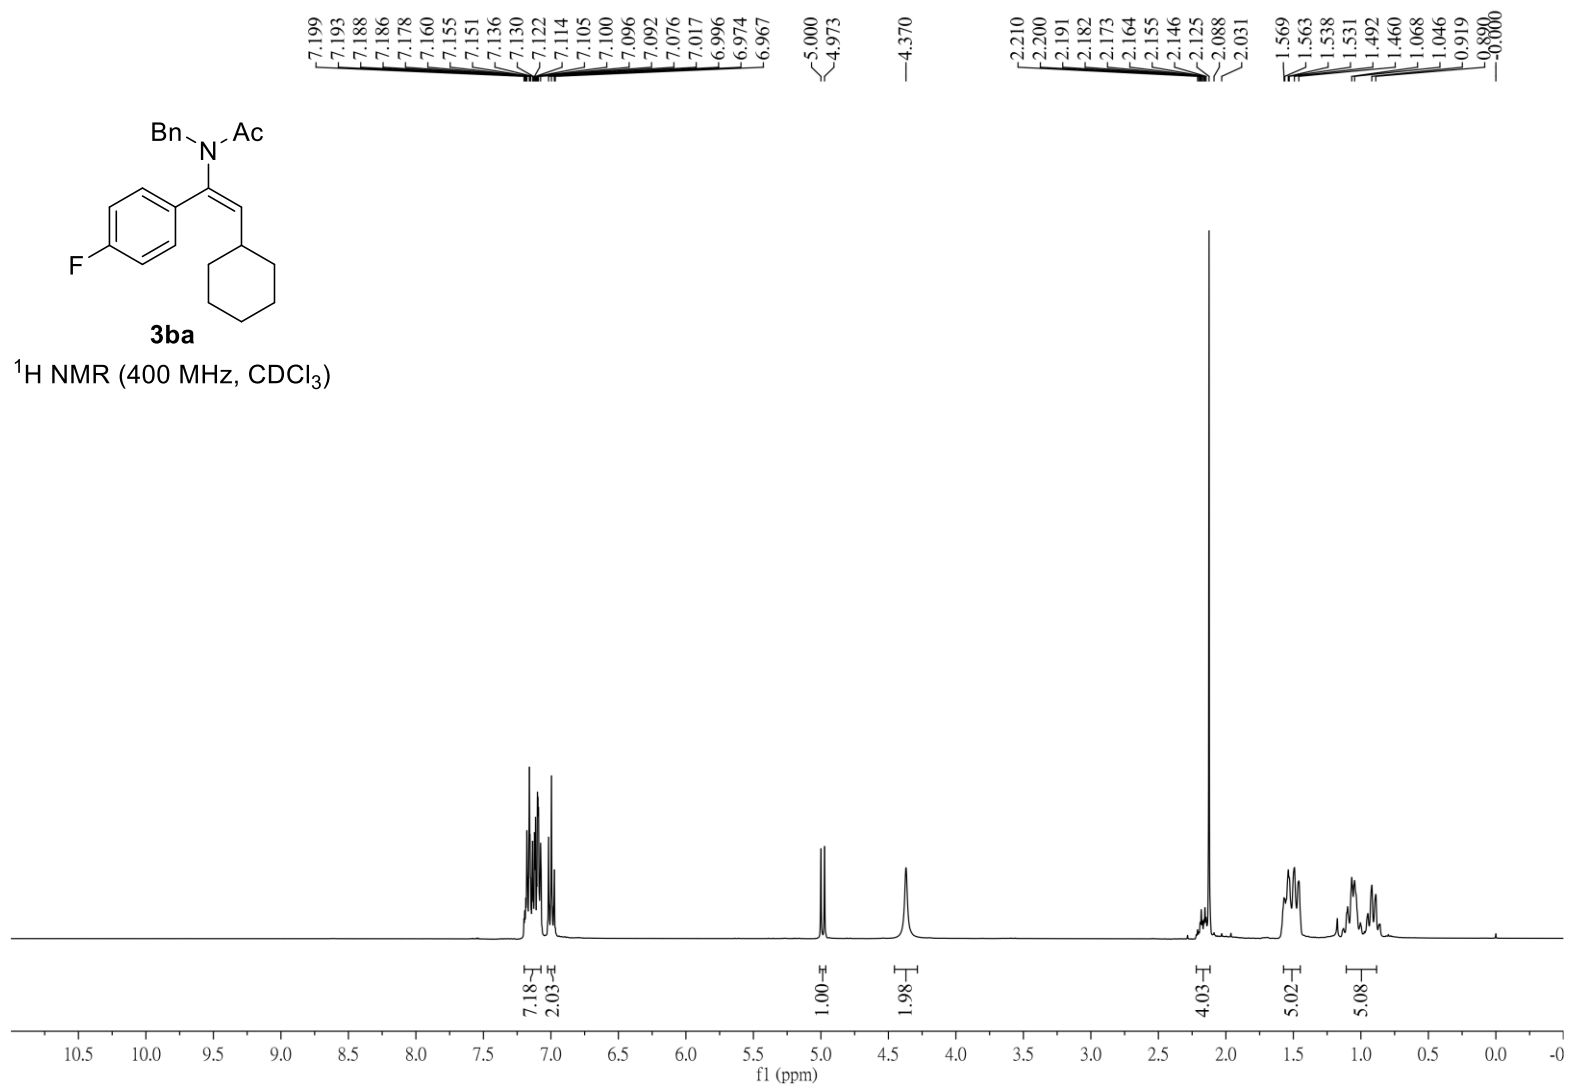

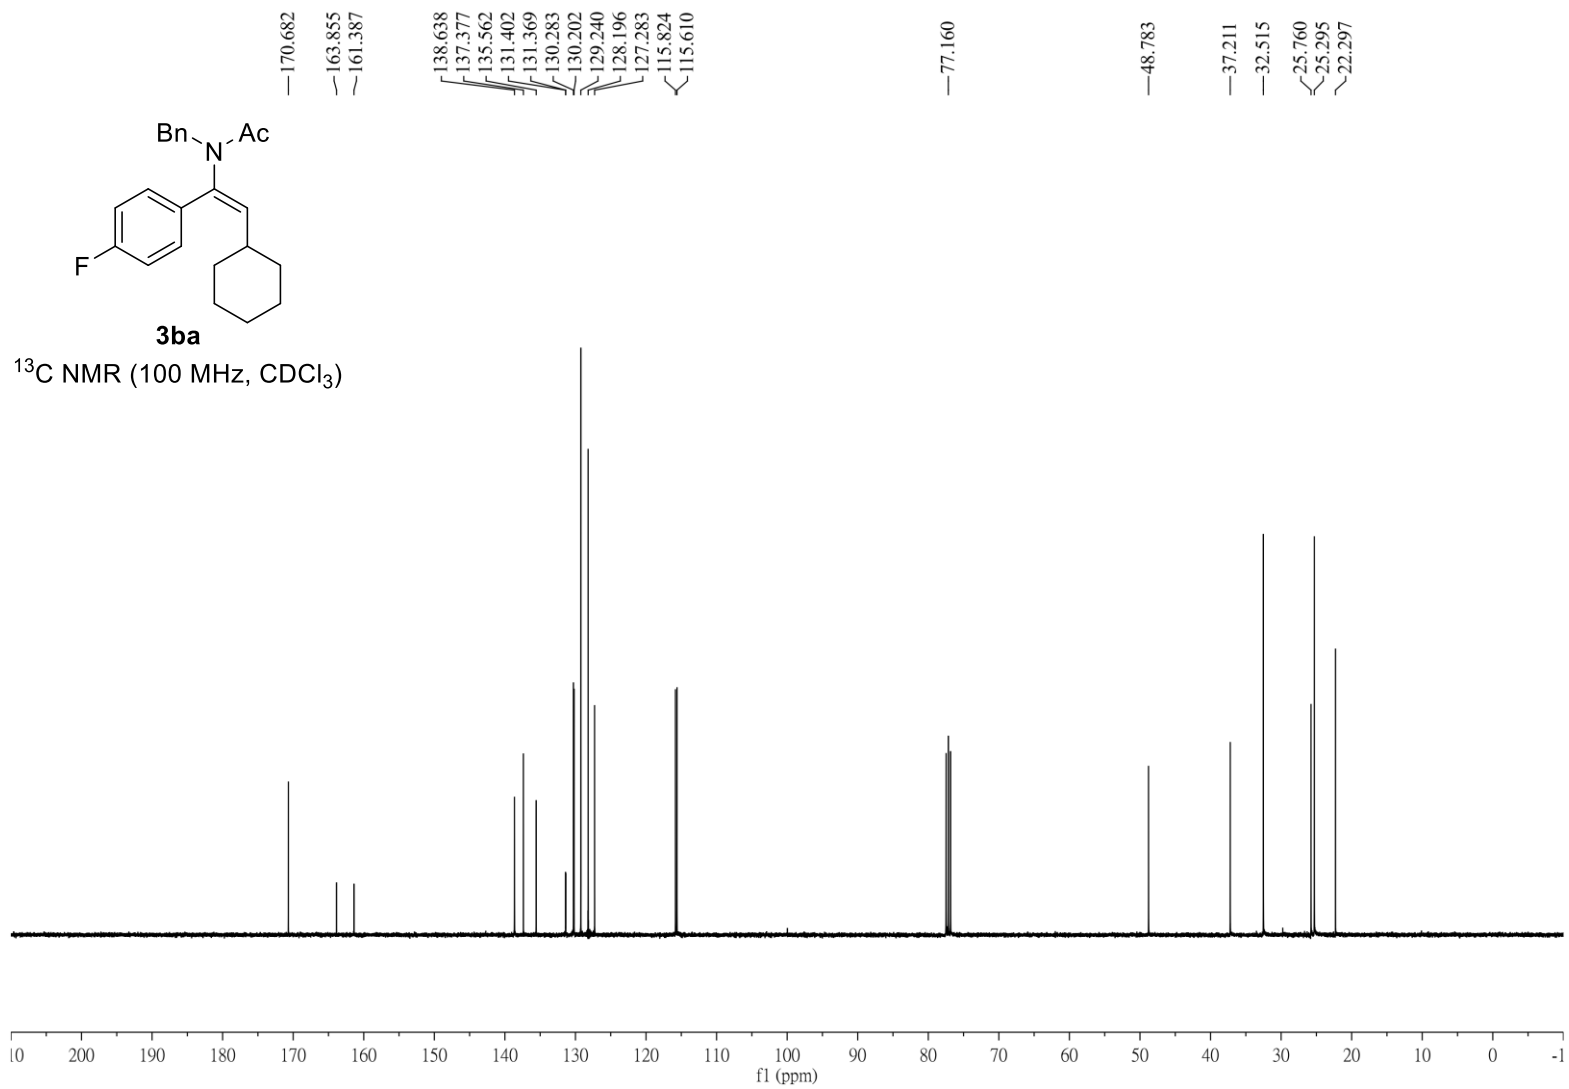



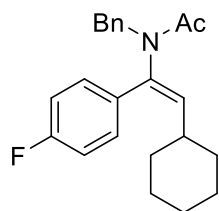

**3ba**

$^{19}\text{F}$  NMR (376 MHz,  $\text{CDCl}_3$ )

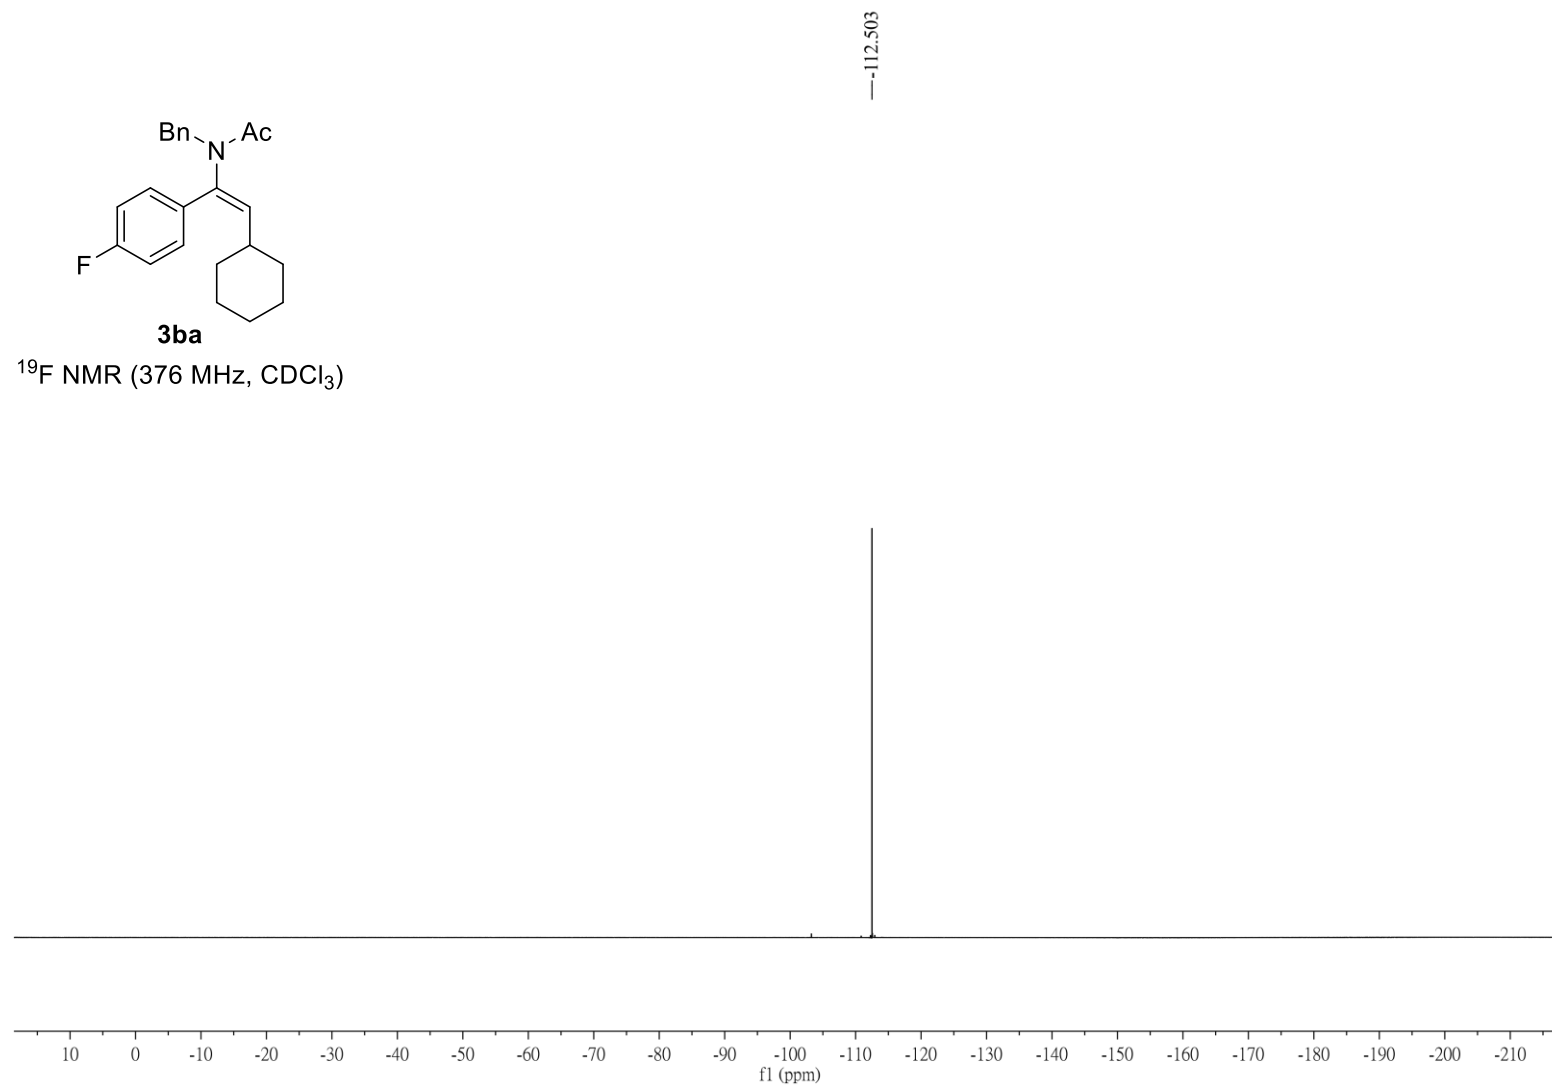

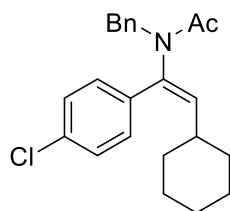

**3ca**

$^1\text{H}$  NMR (400 MHz,  $\text{CDCl}_3$ )

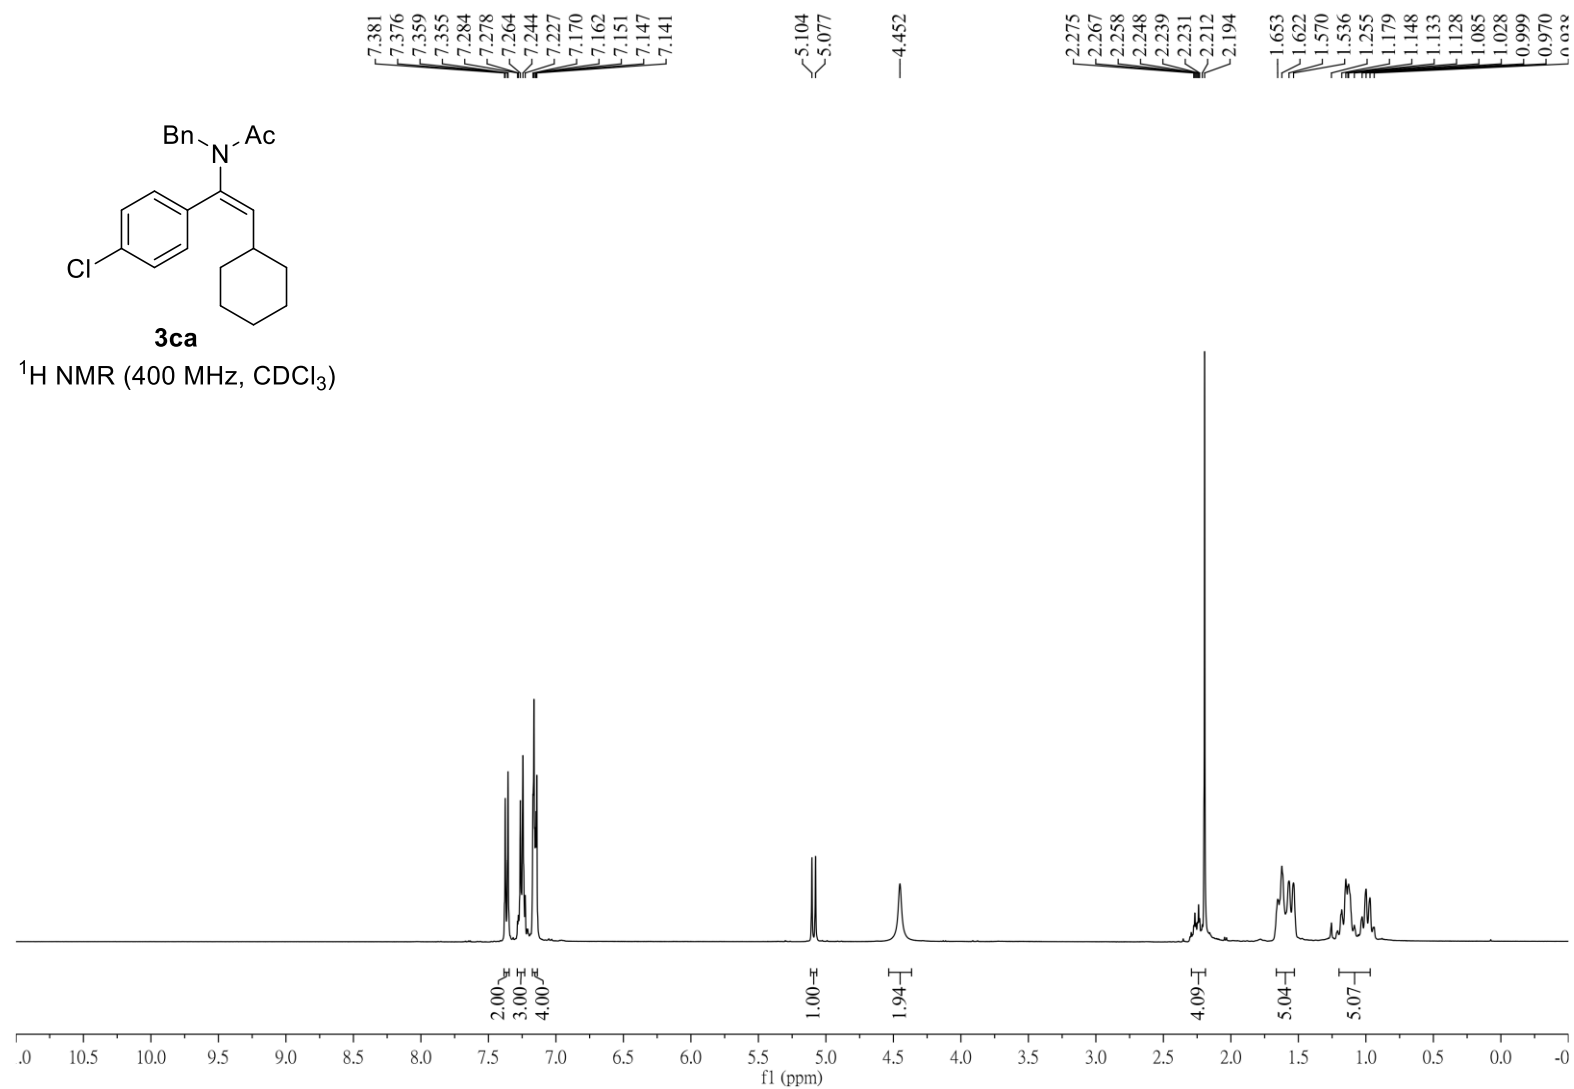

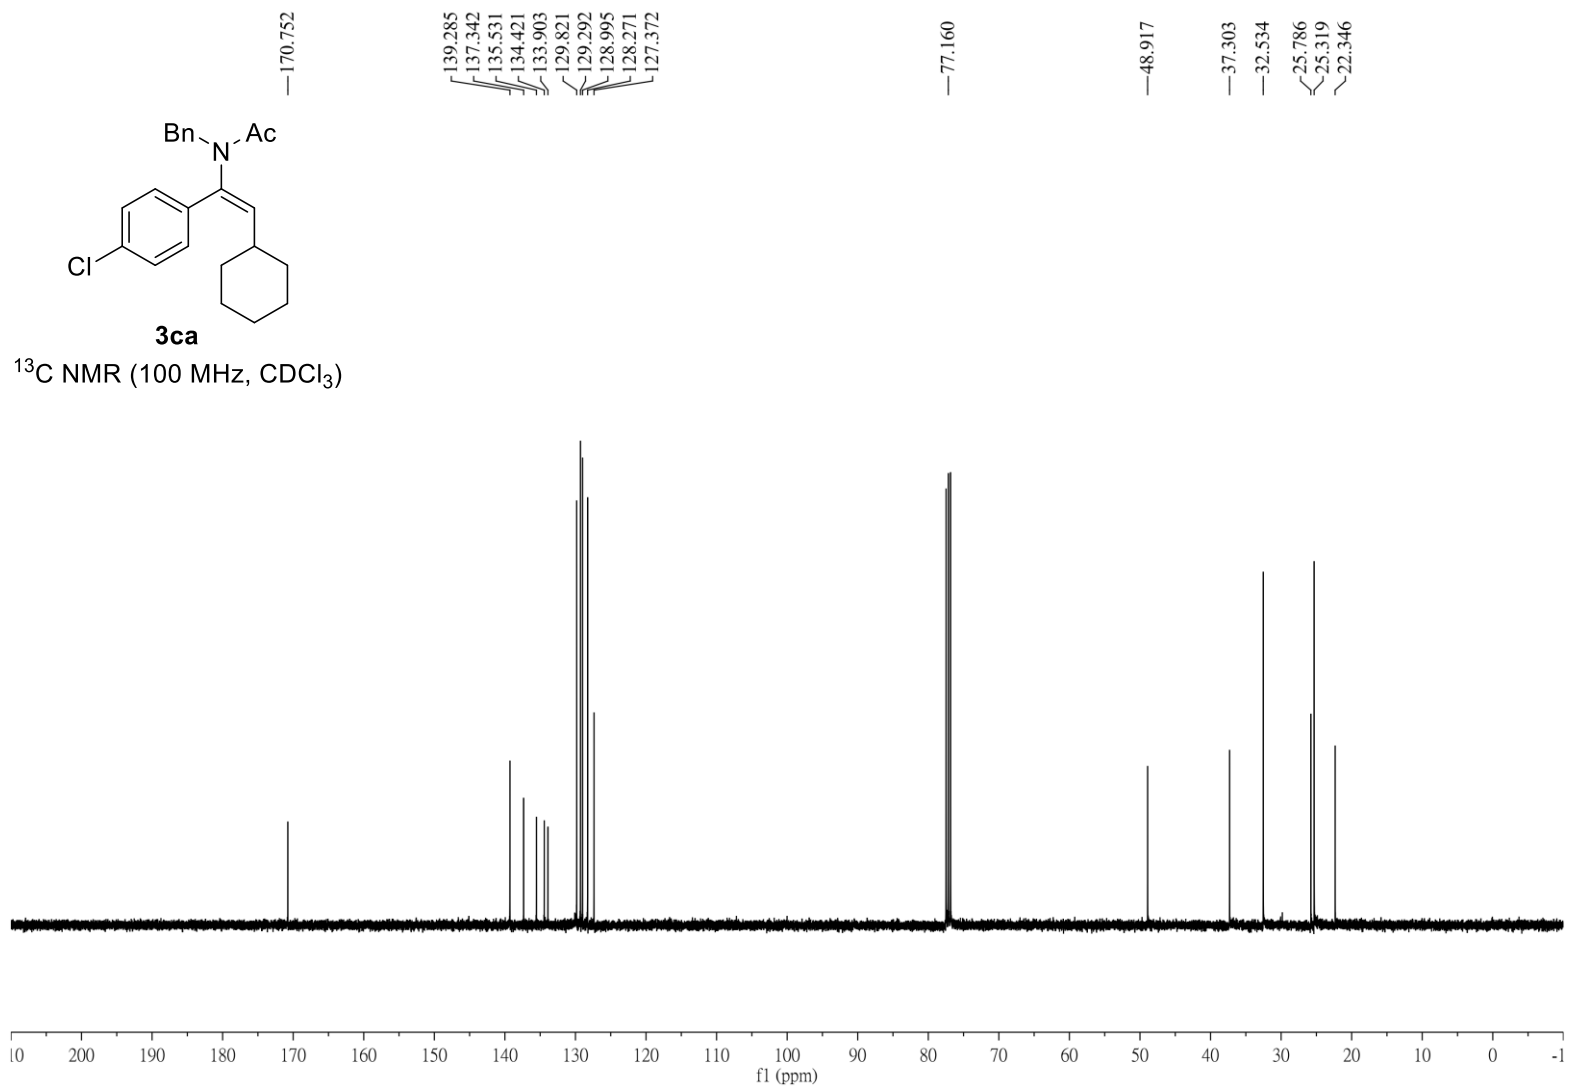

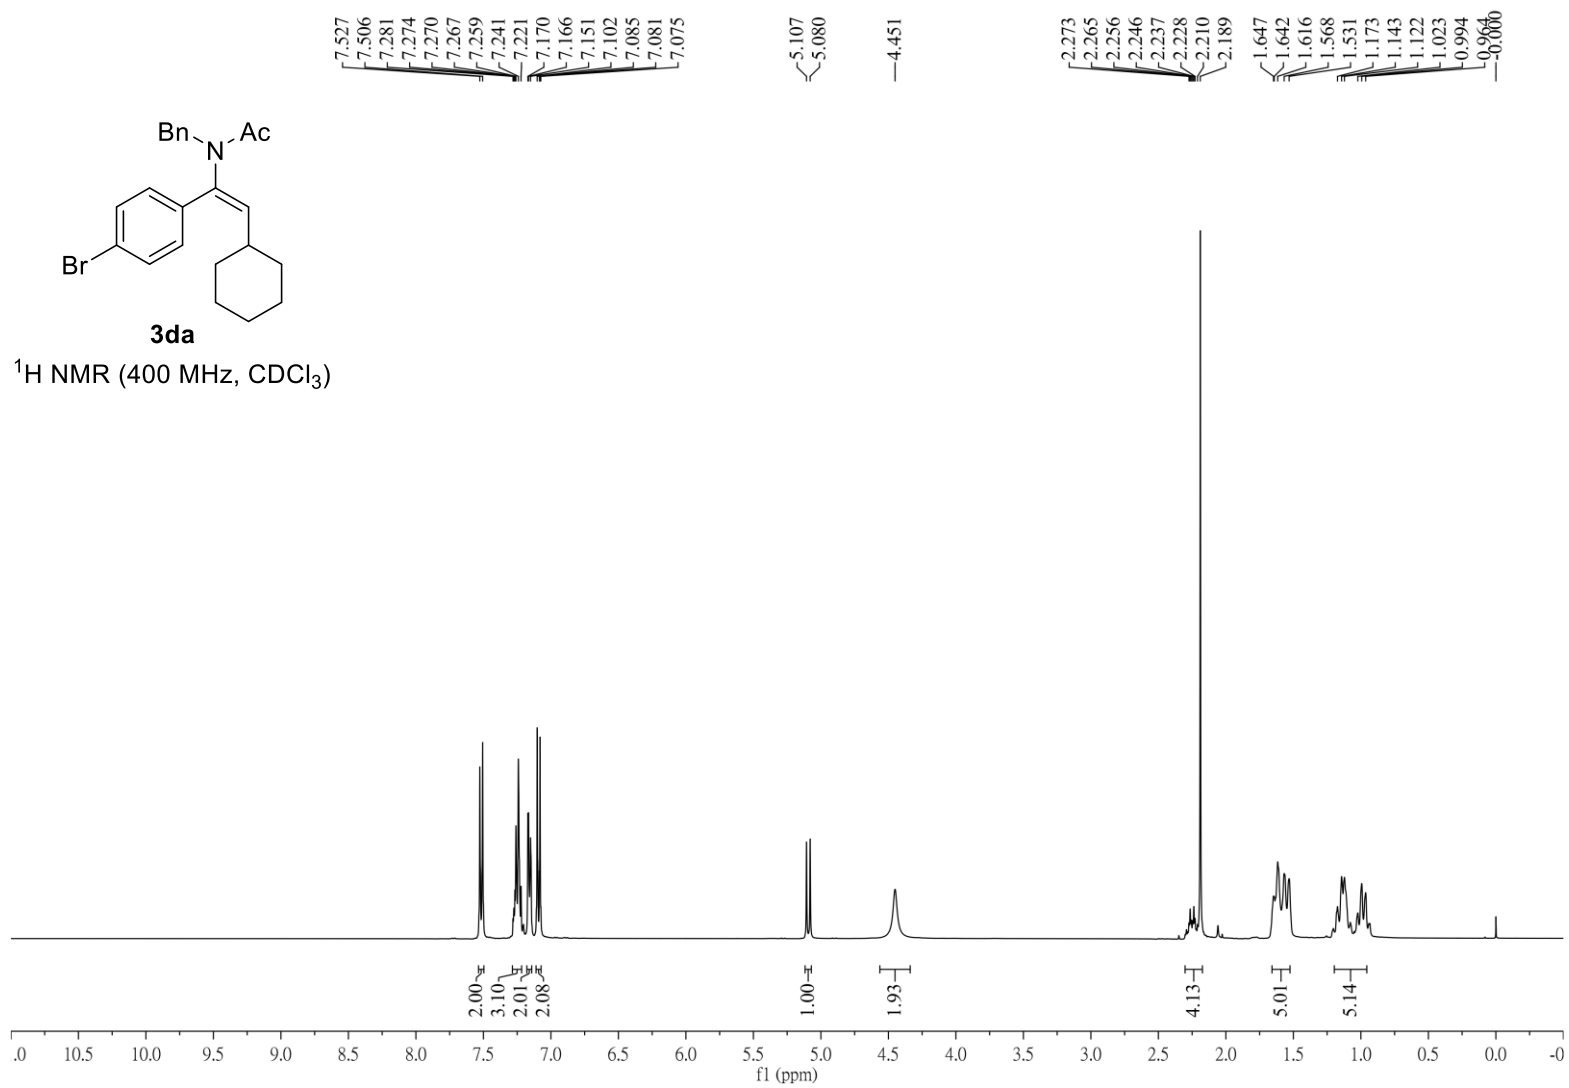

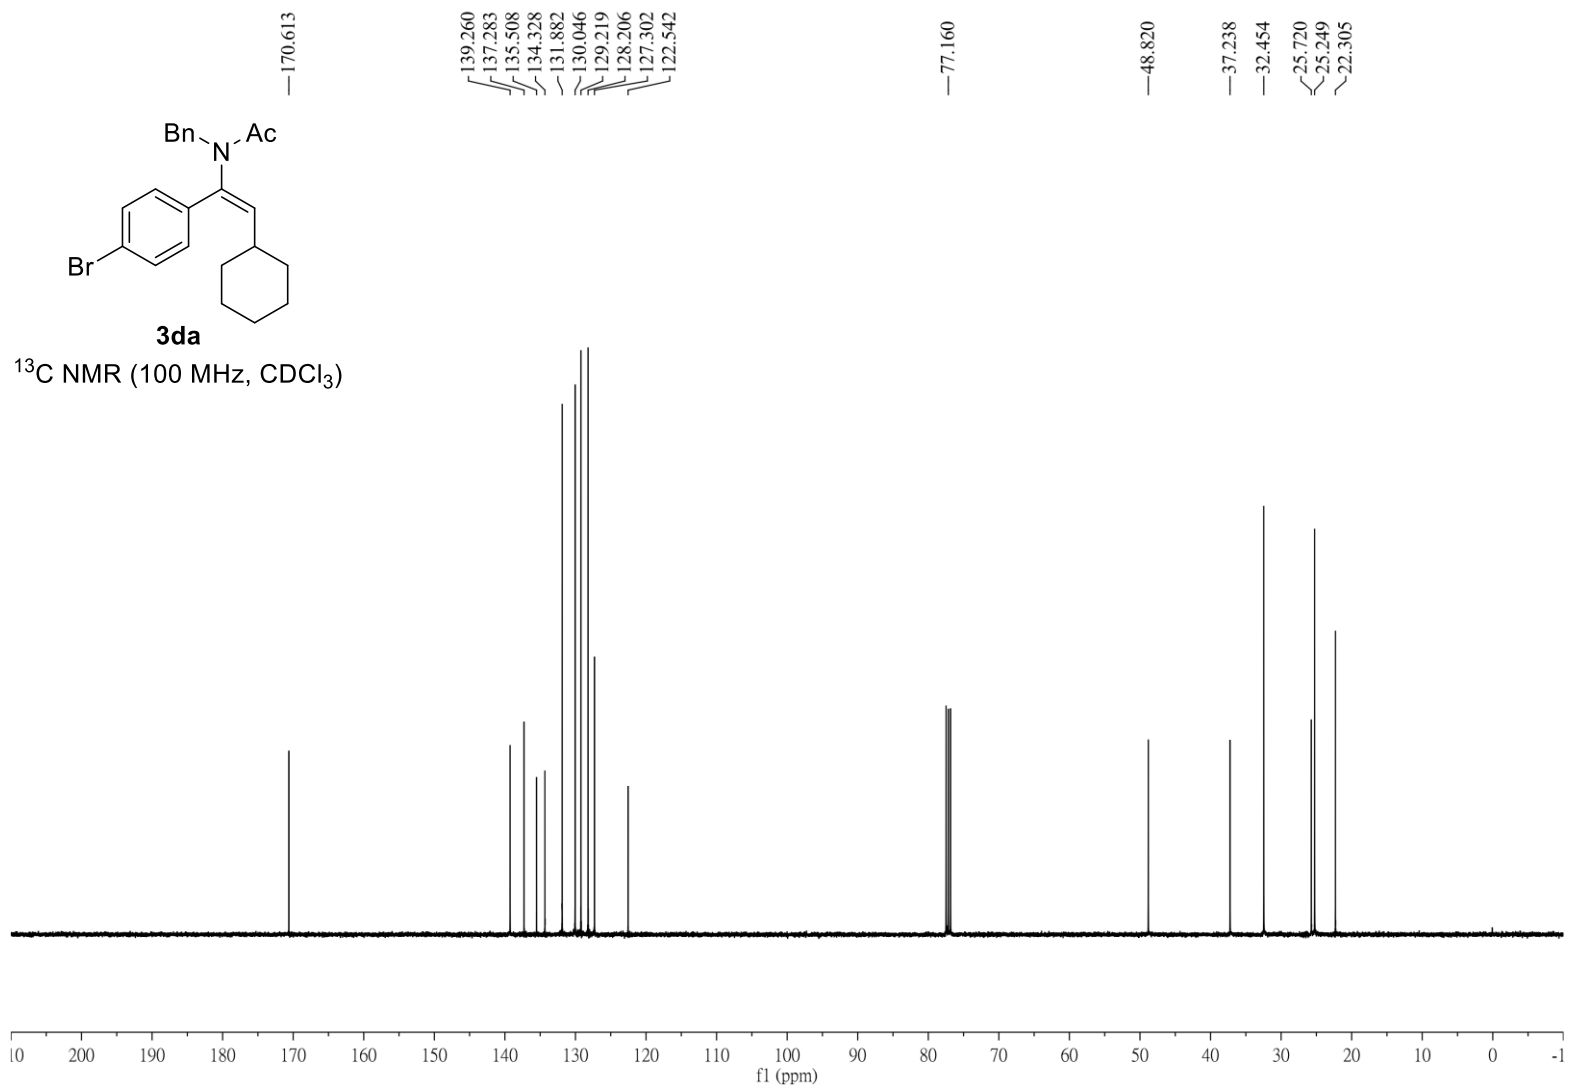

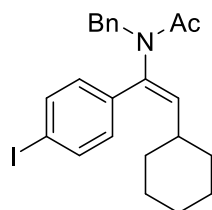

**3ea**

$^1\text{H}$  NMR (400 MHz,  $\text{CDCl}_3$ )

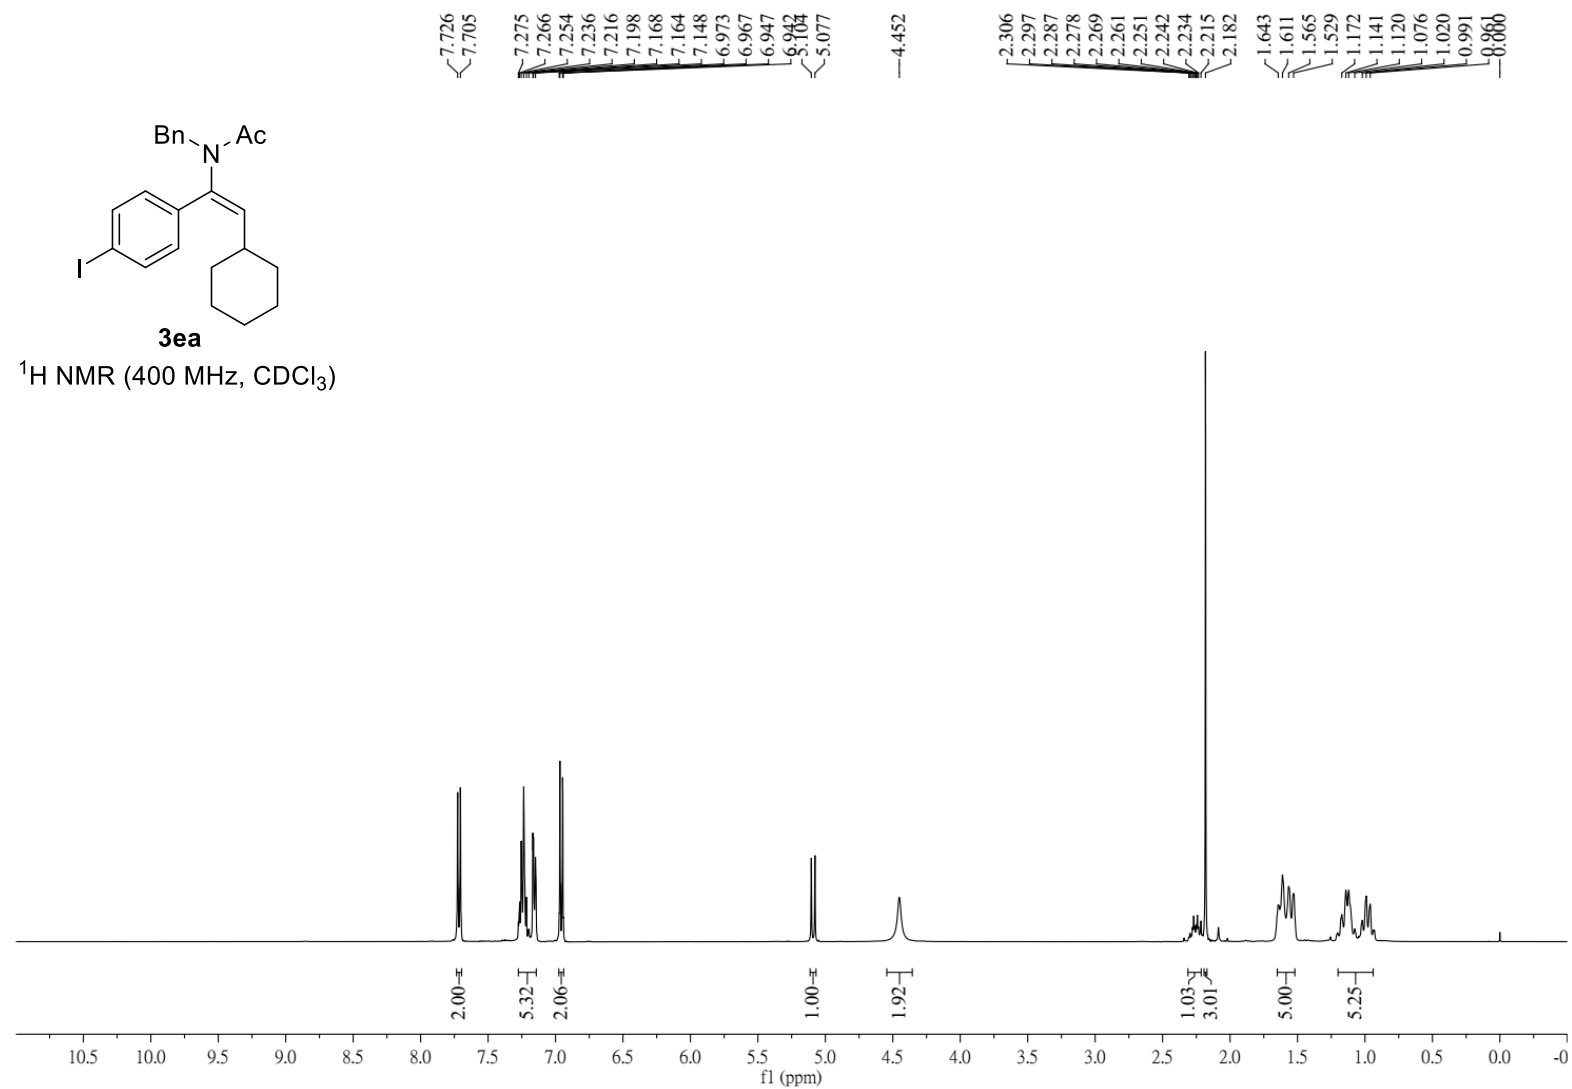

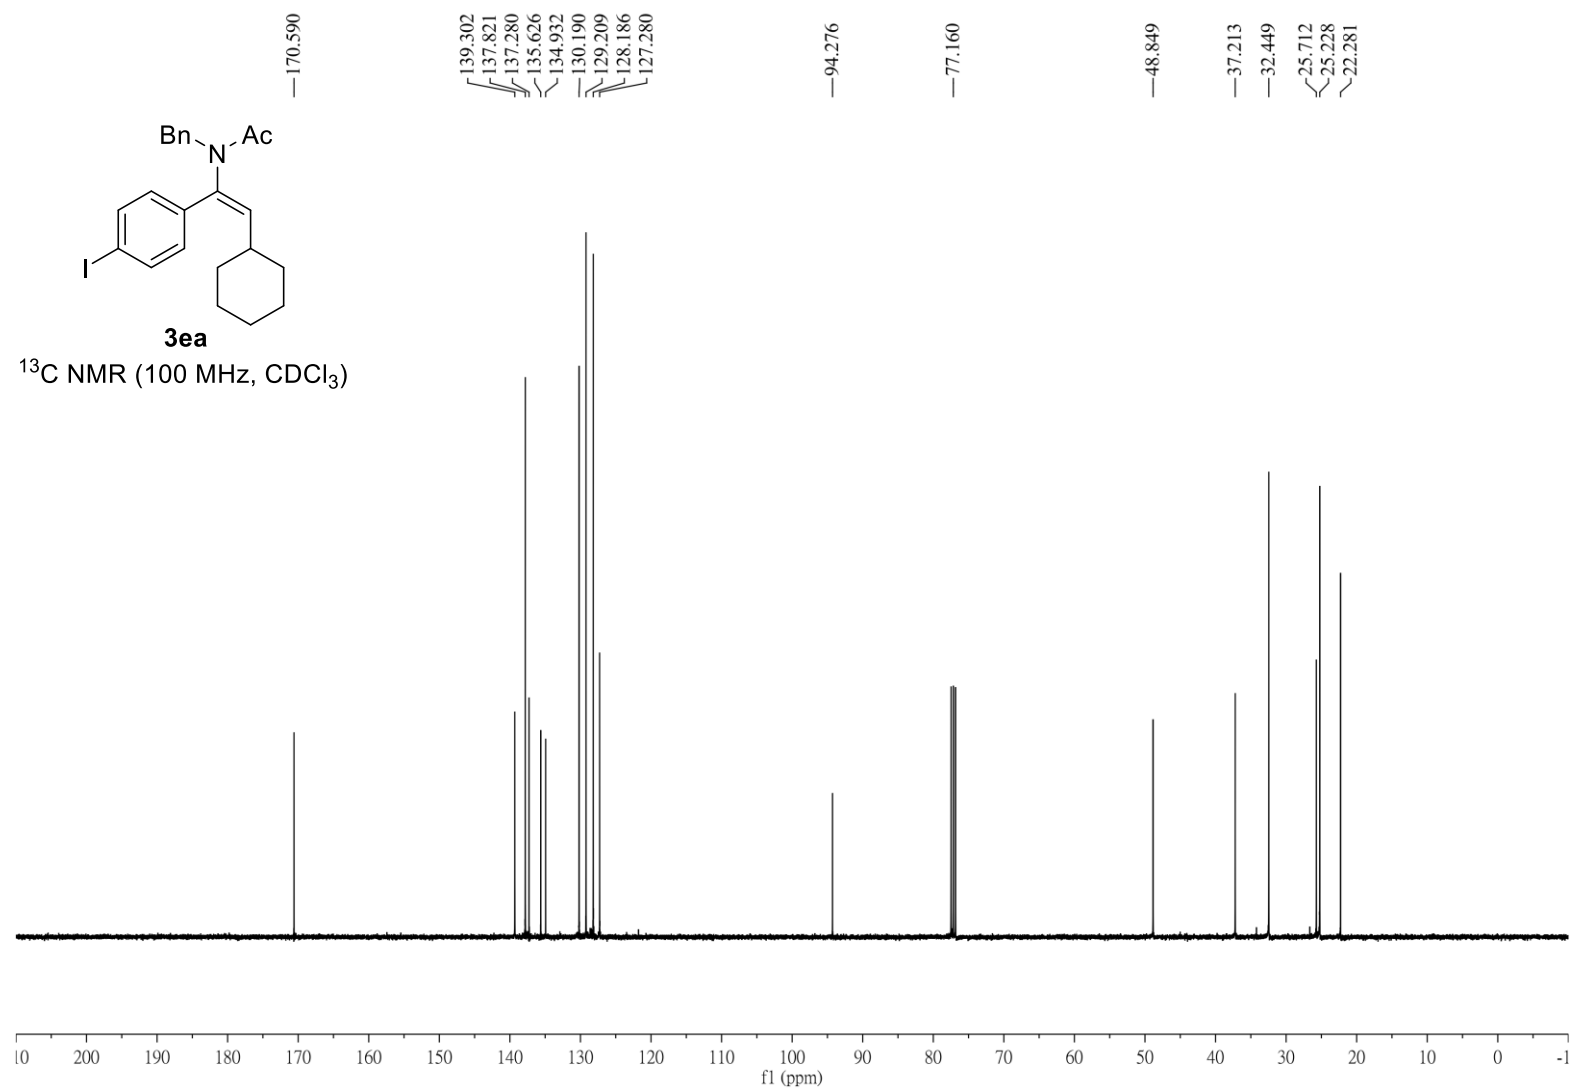

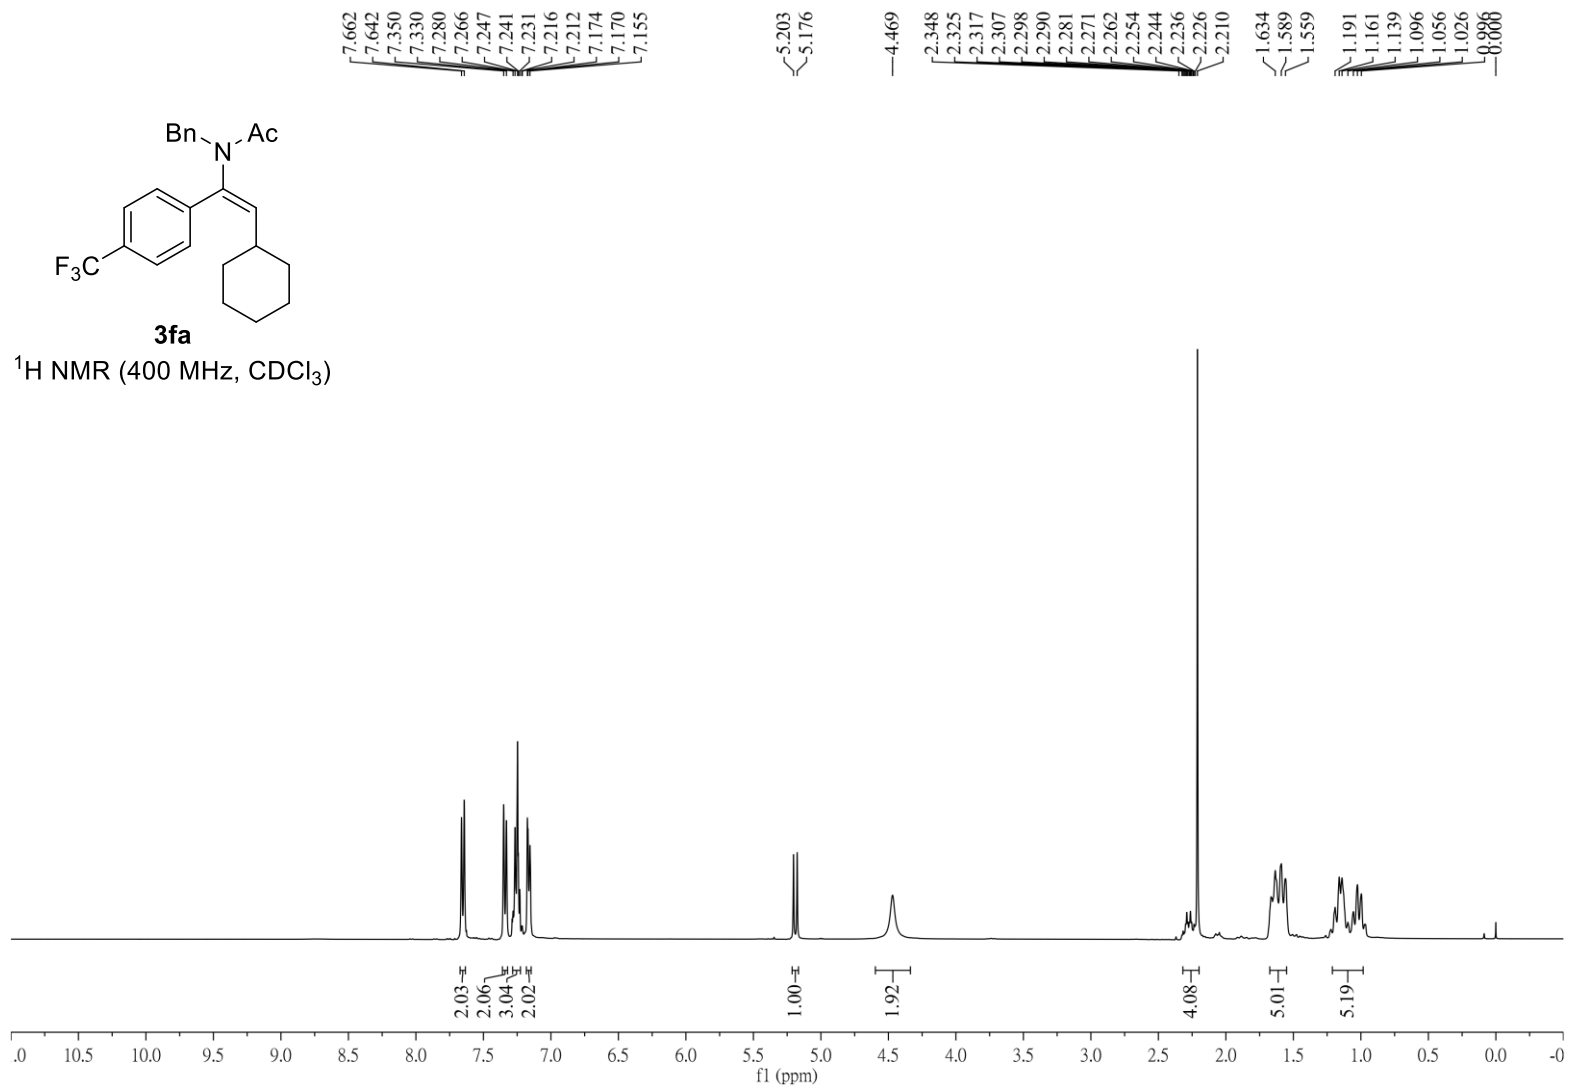



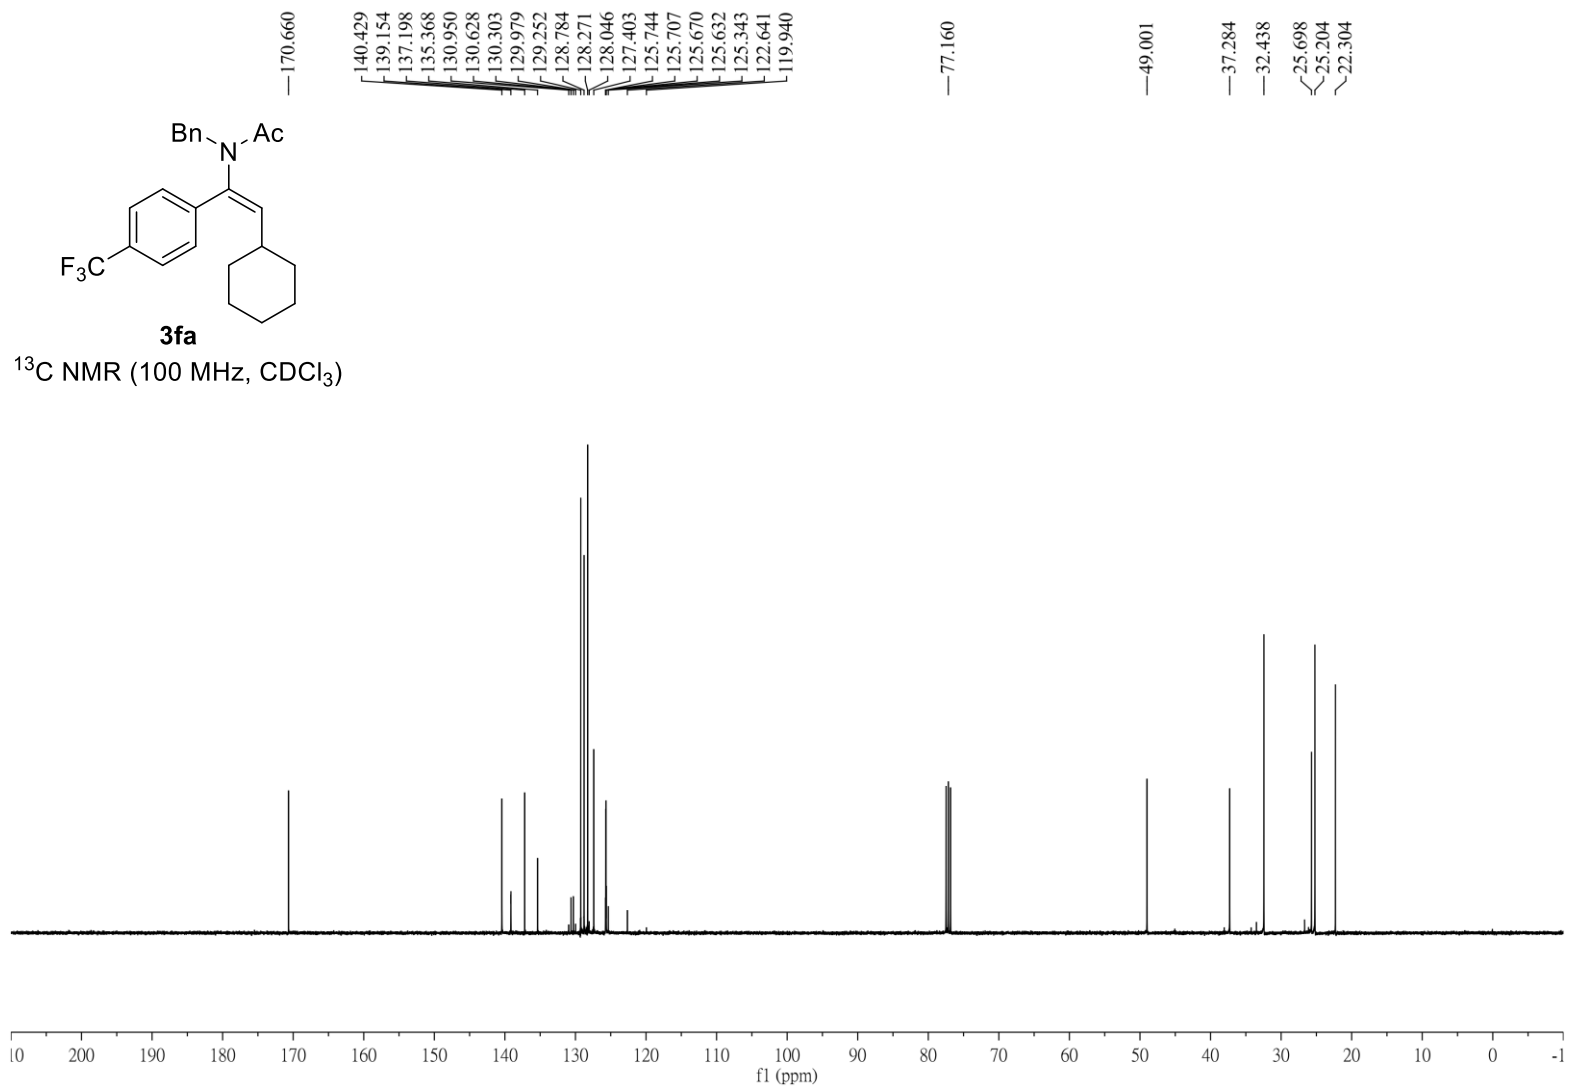

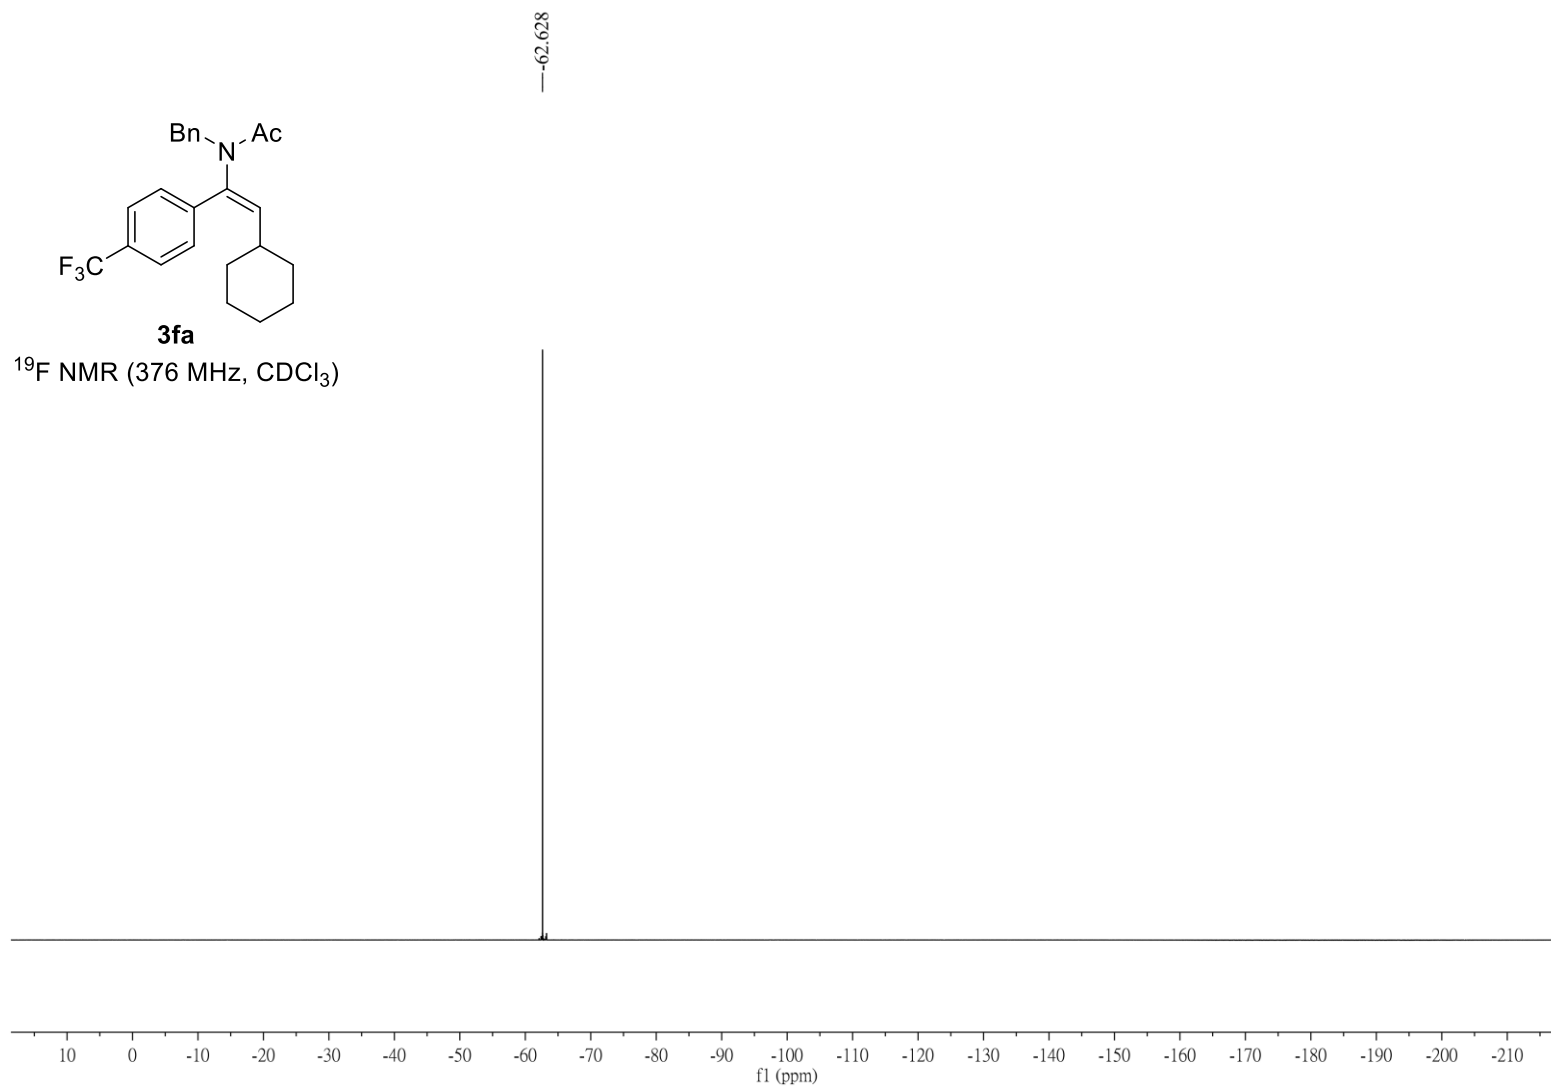

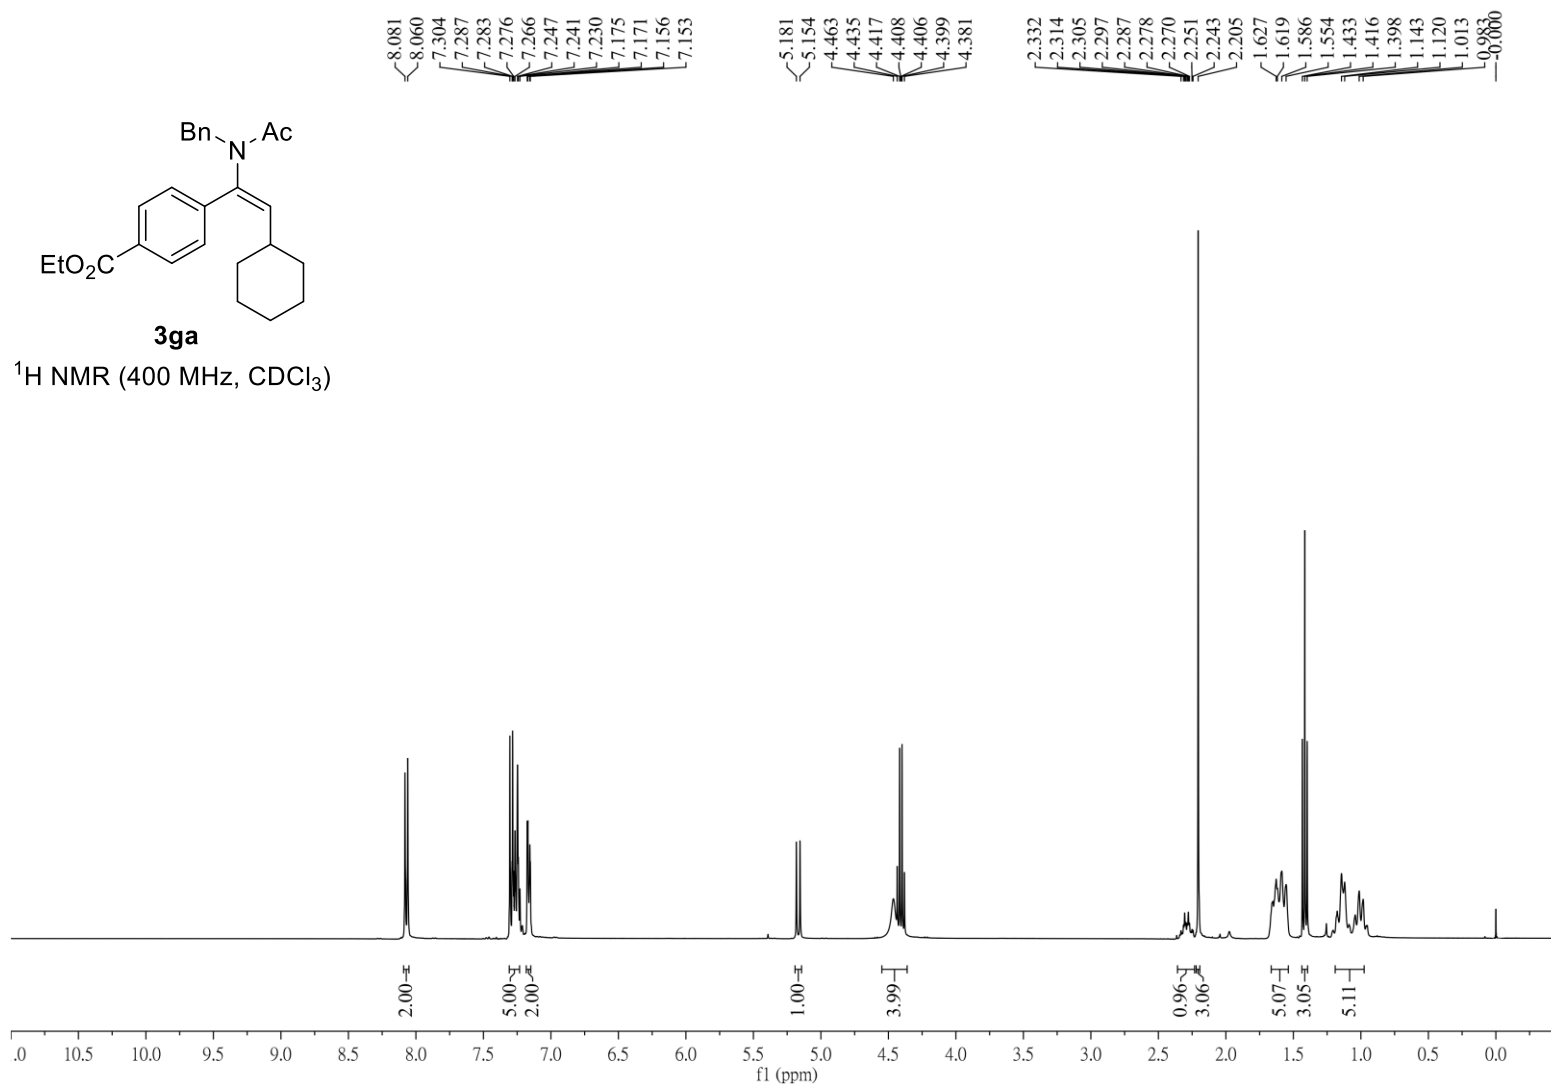

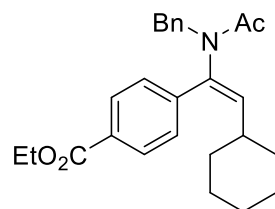

**3ga**

<sup>13</sup>C NMR (100 MHz, CDCl<sub>3</sub>)

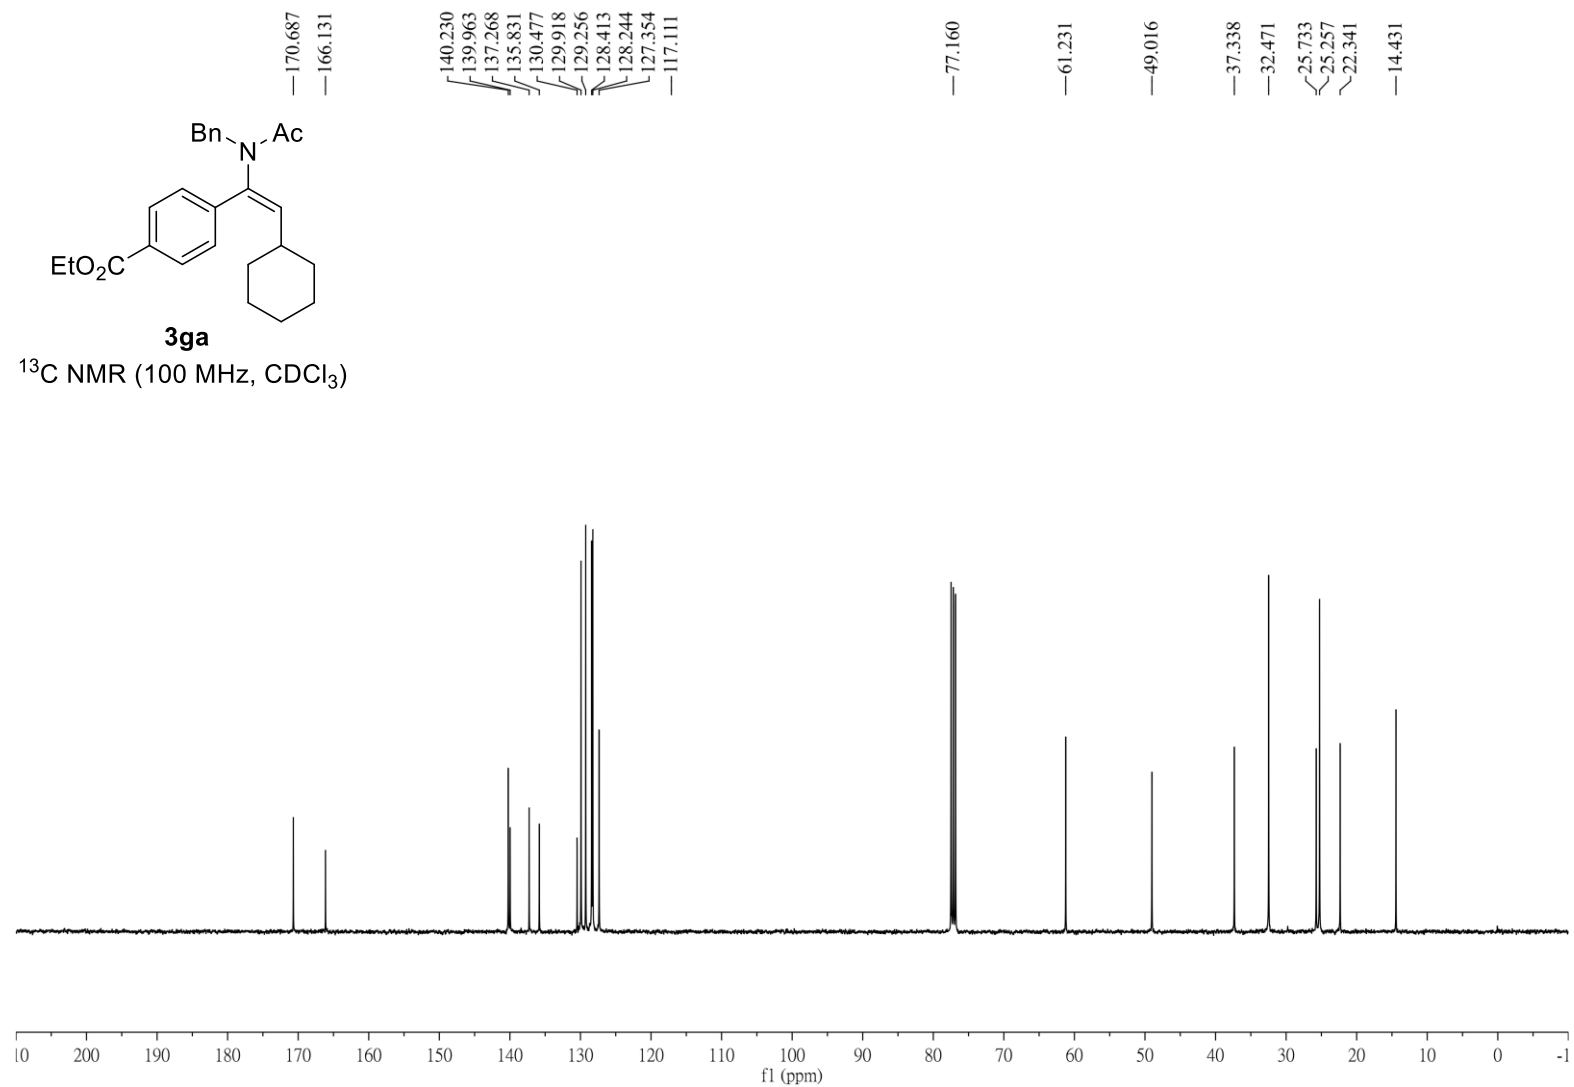

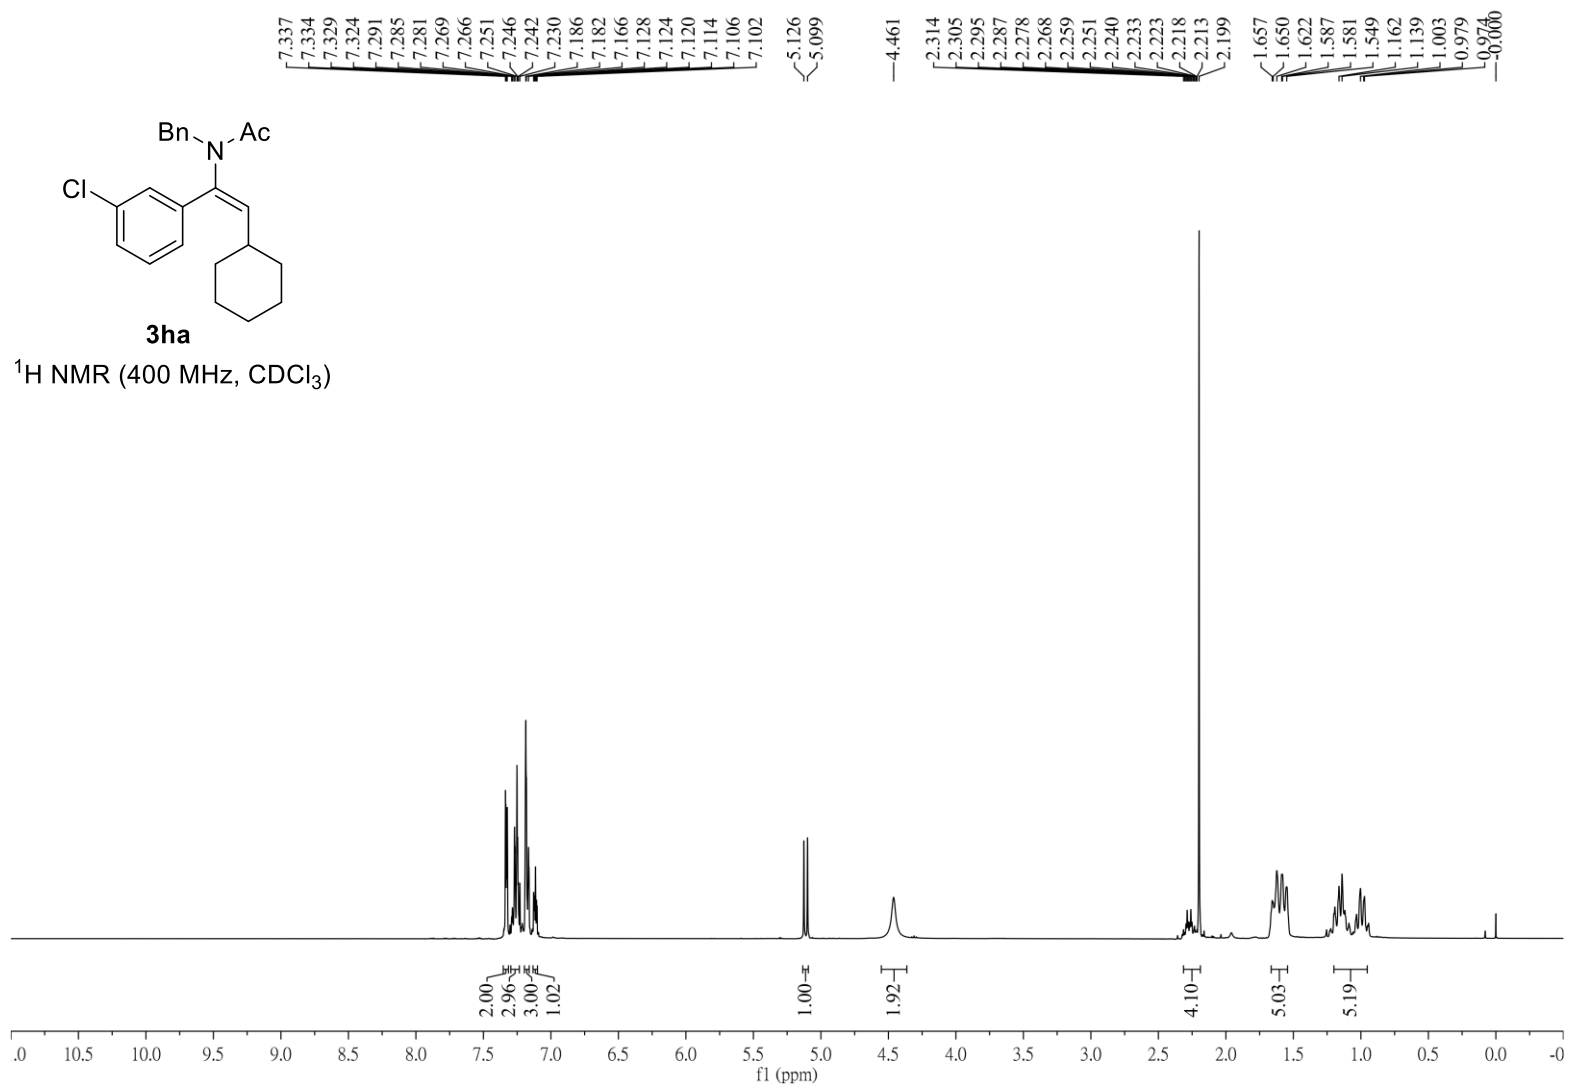

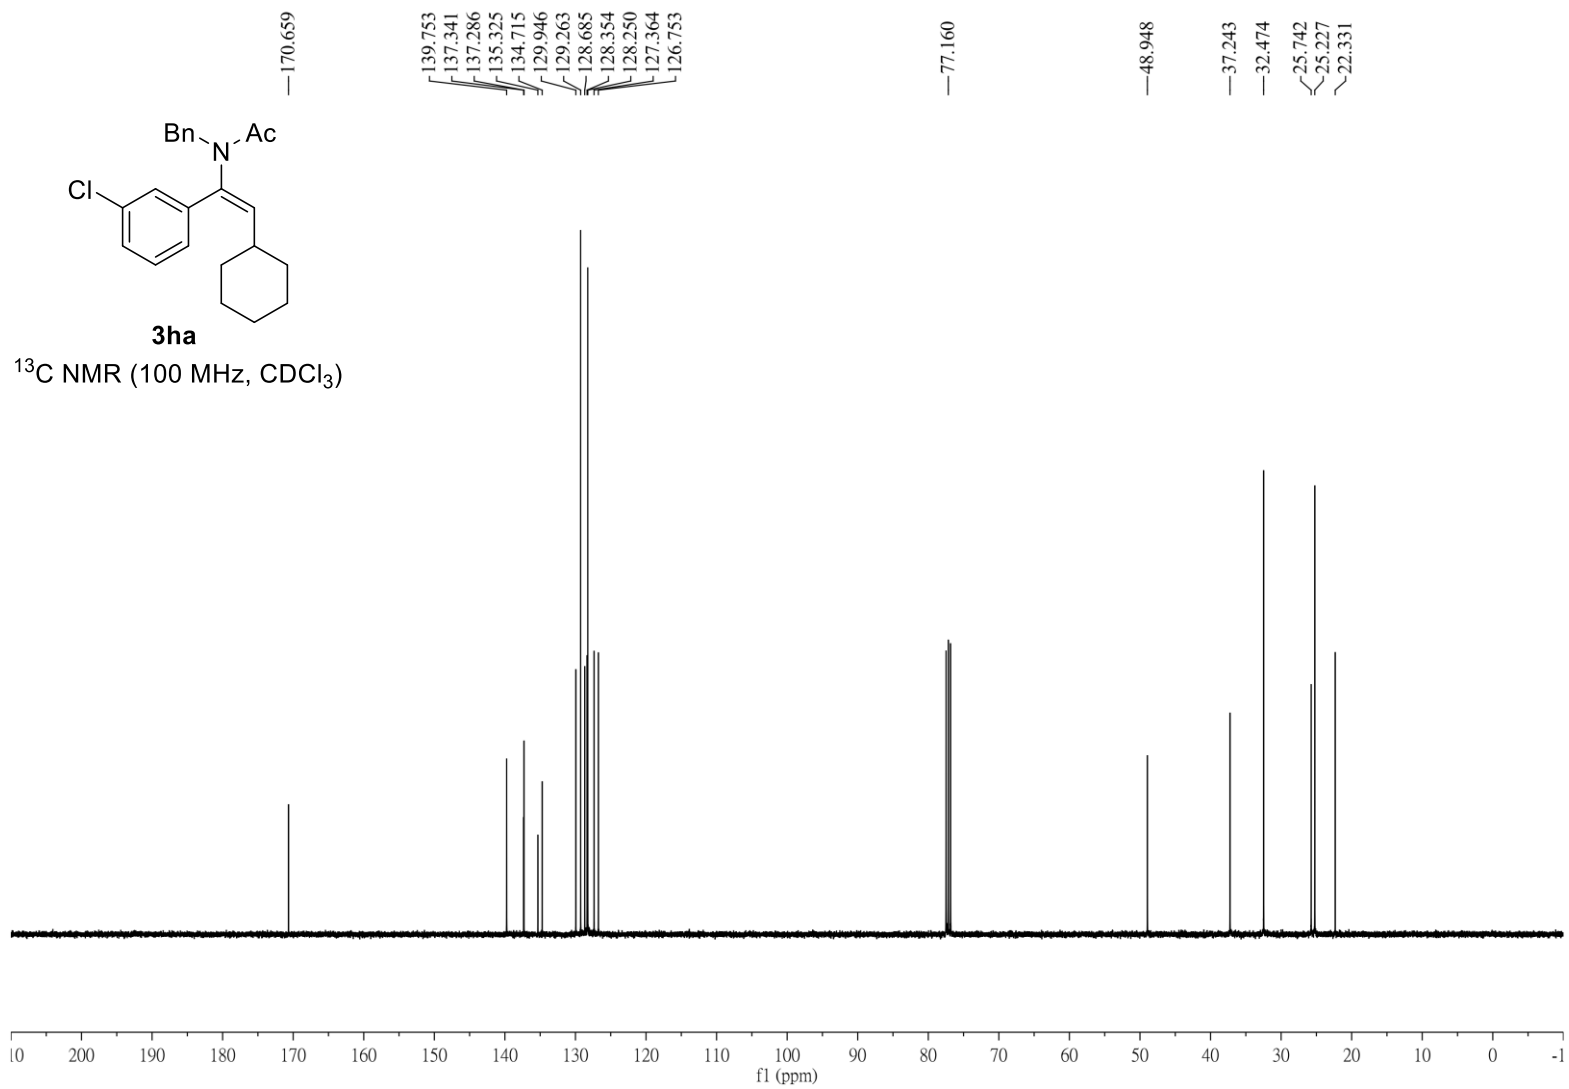

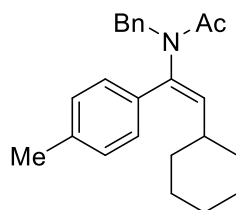

**3ia**

$^1\text{H}$  NMR (400 MHz,  $\text{CDCl}_3$ )

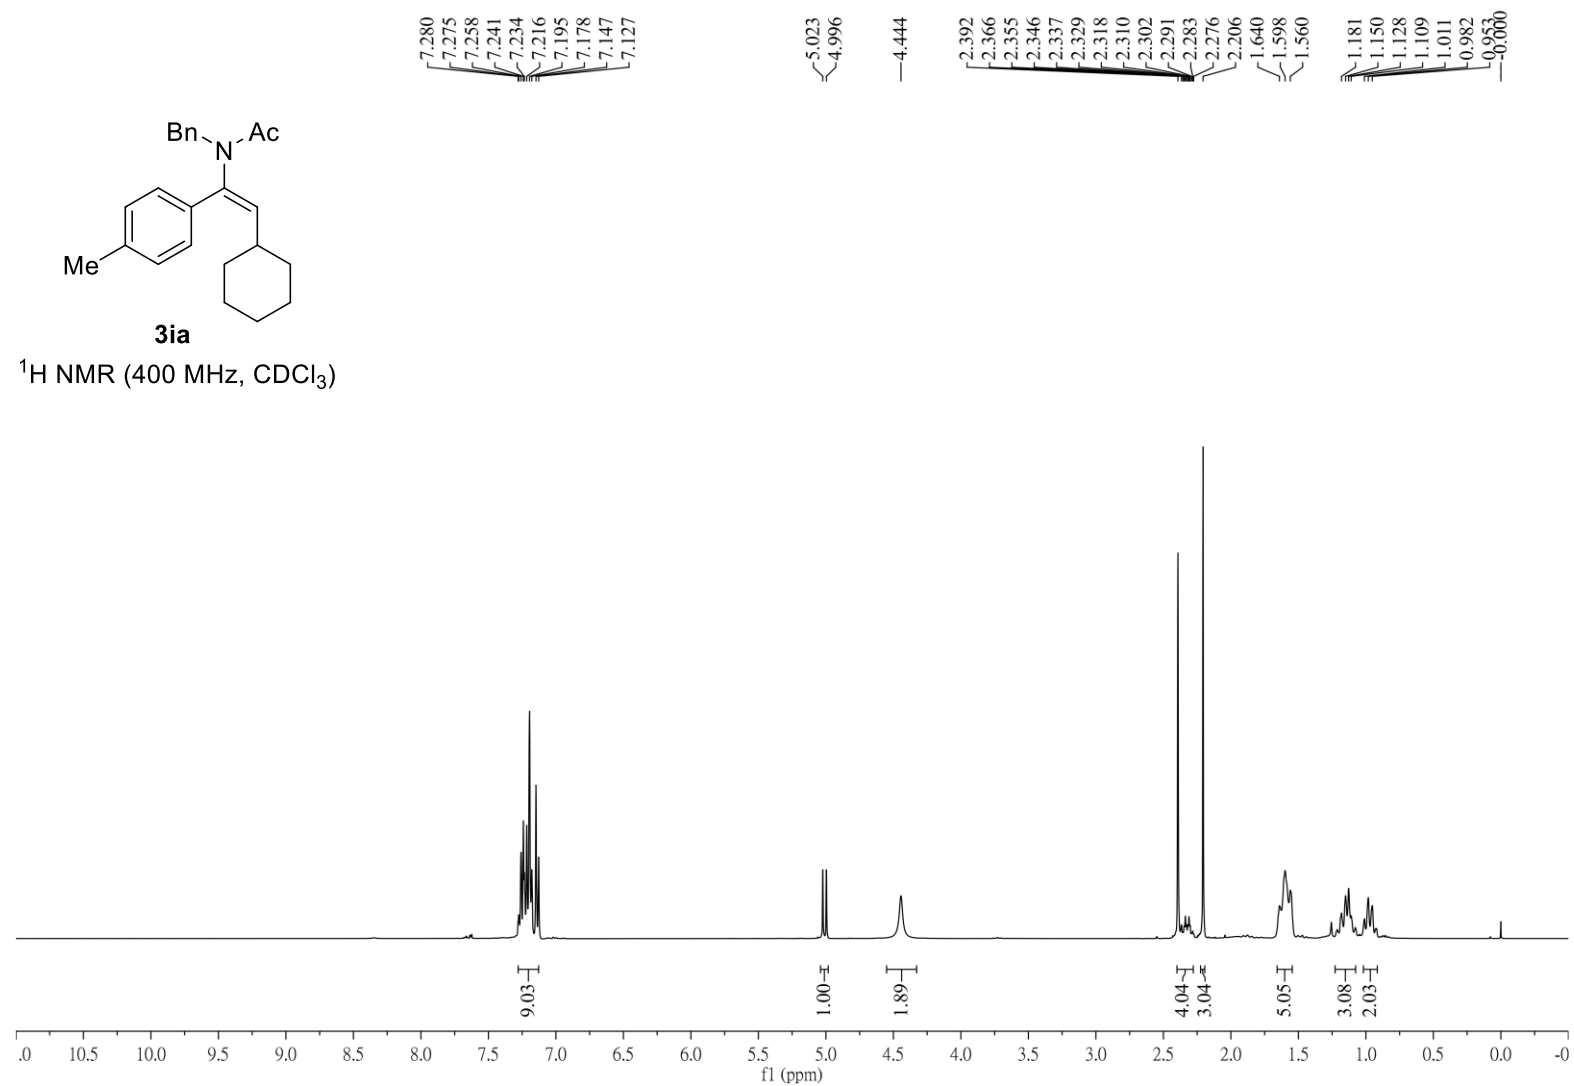

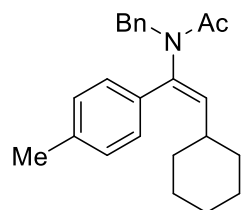

**3ia**

$^{13}\text{C}$  NMR (100 MHz,  $\text{CDCl}_3$ )

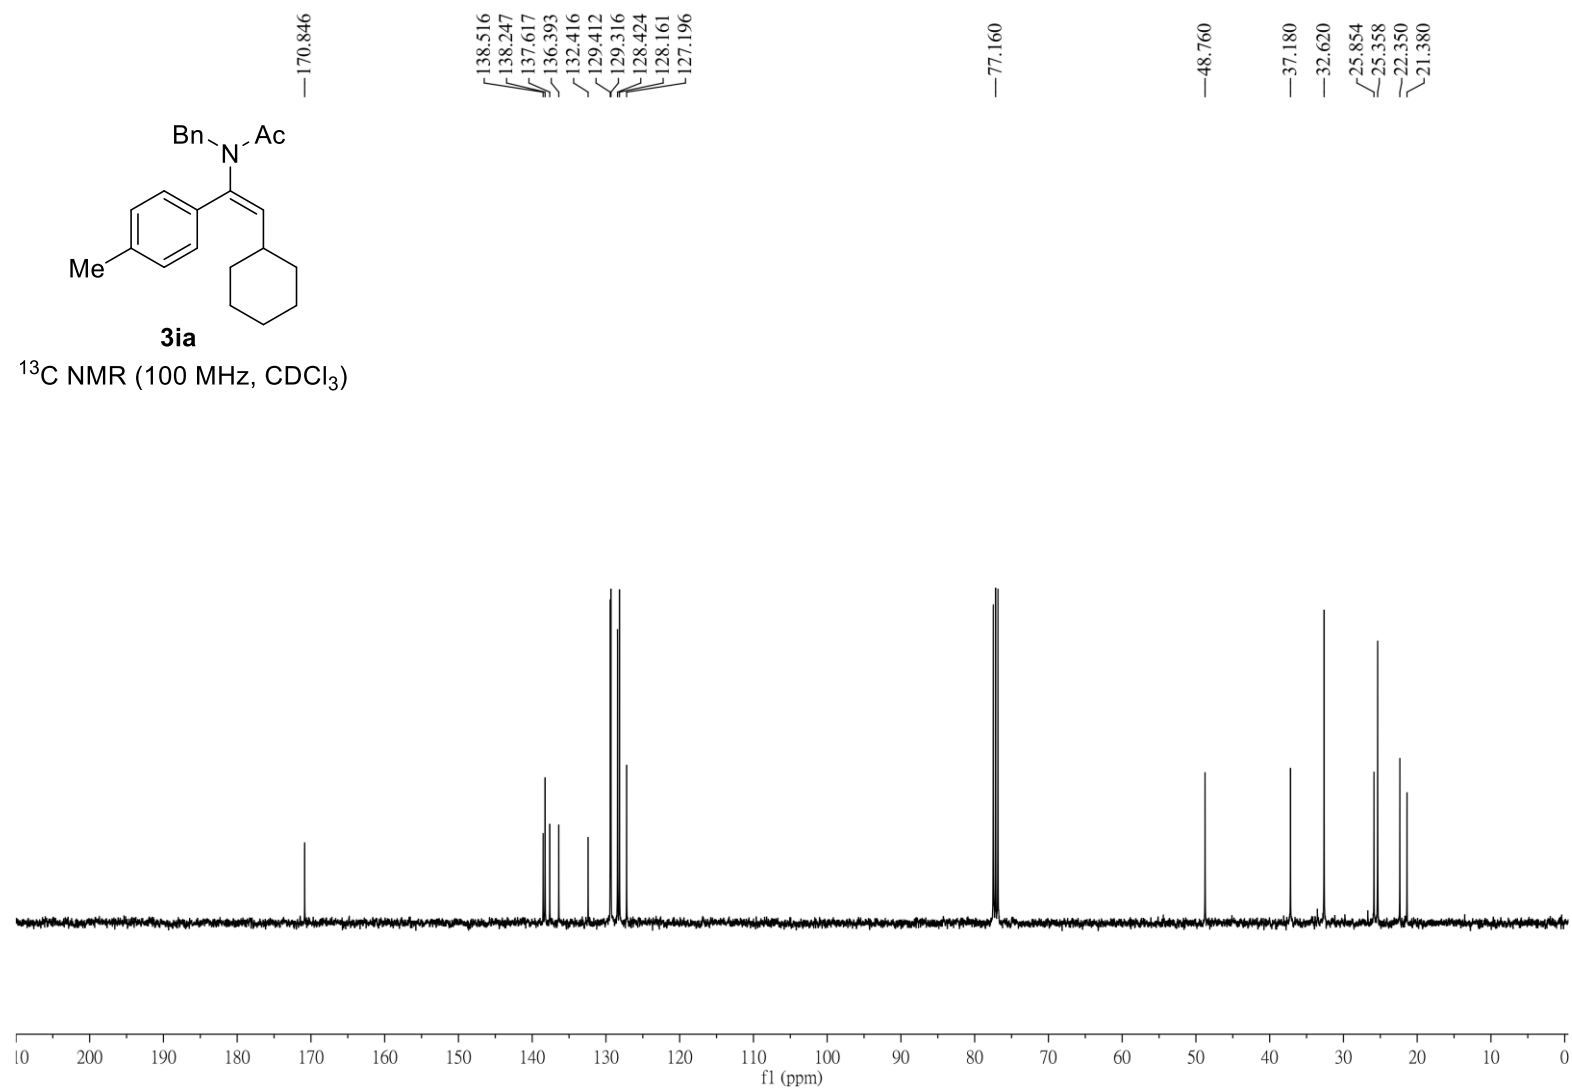



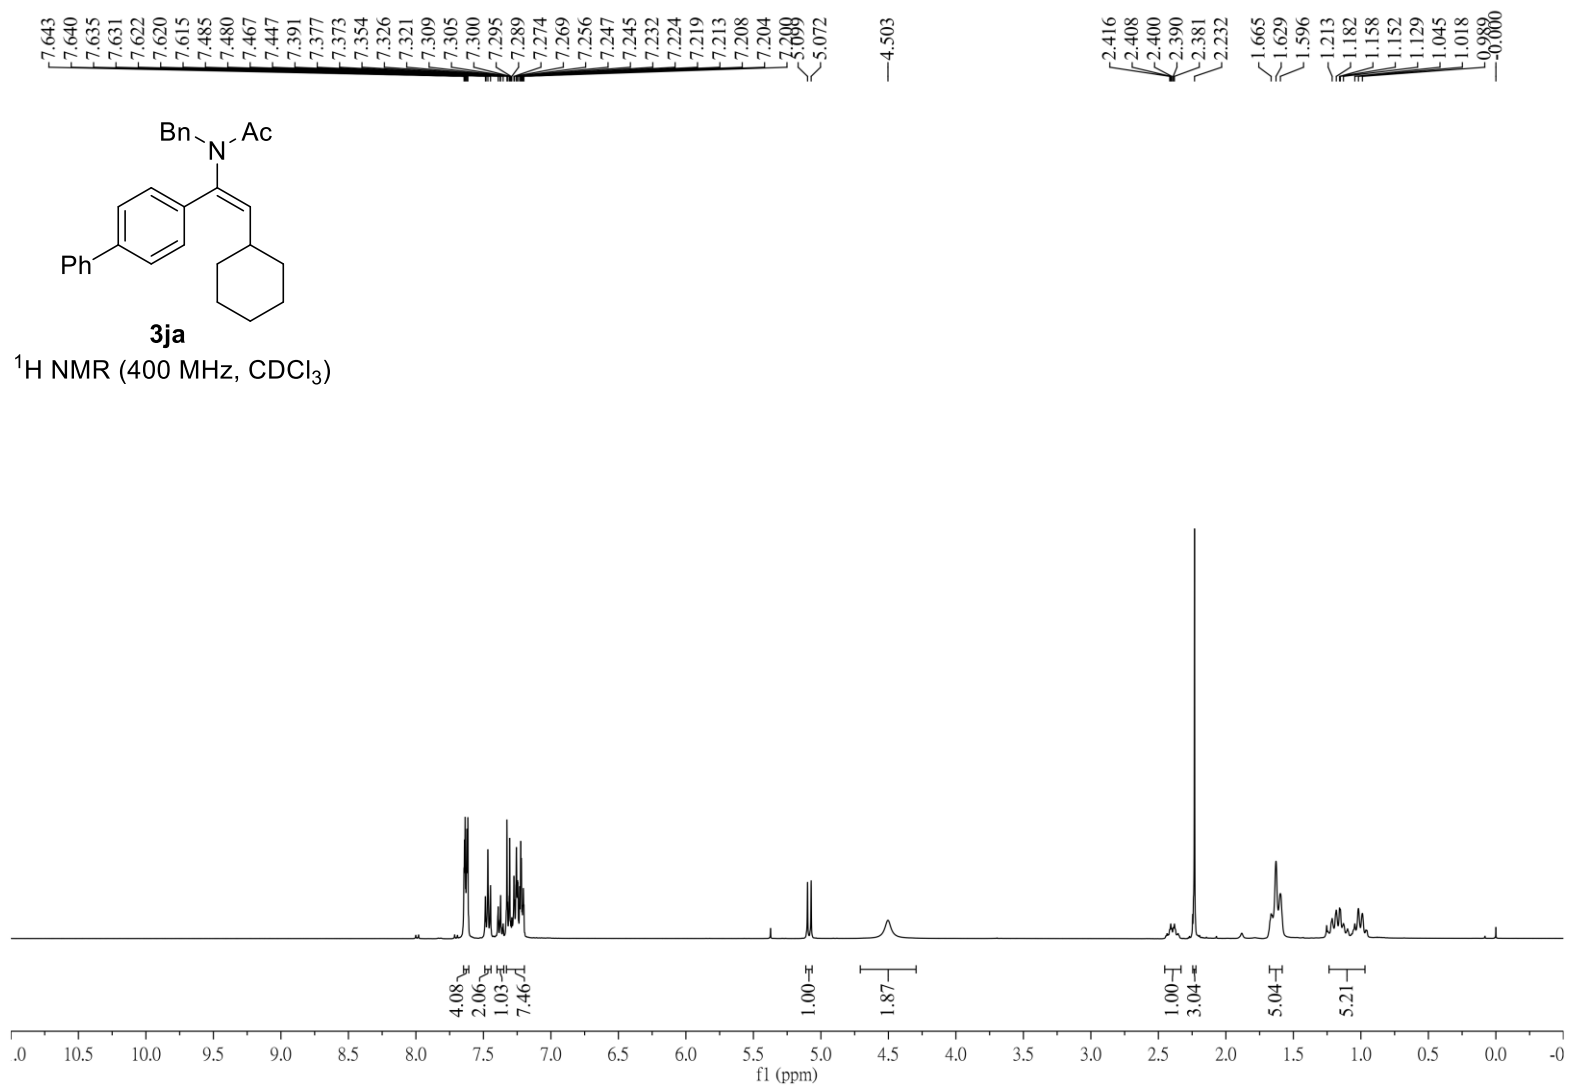

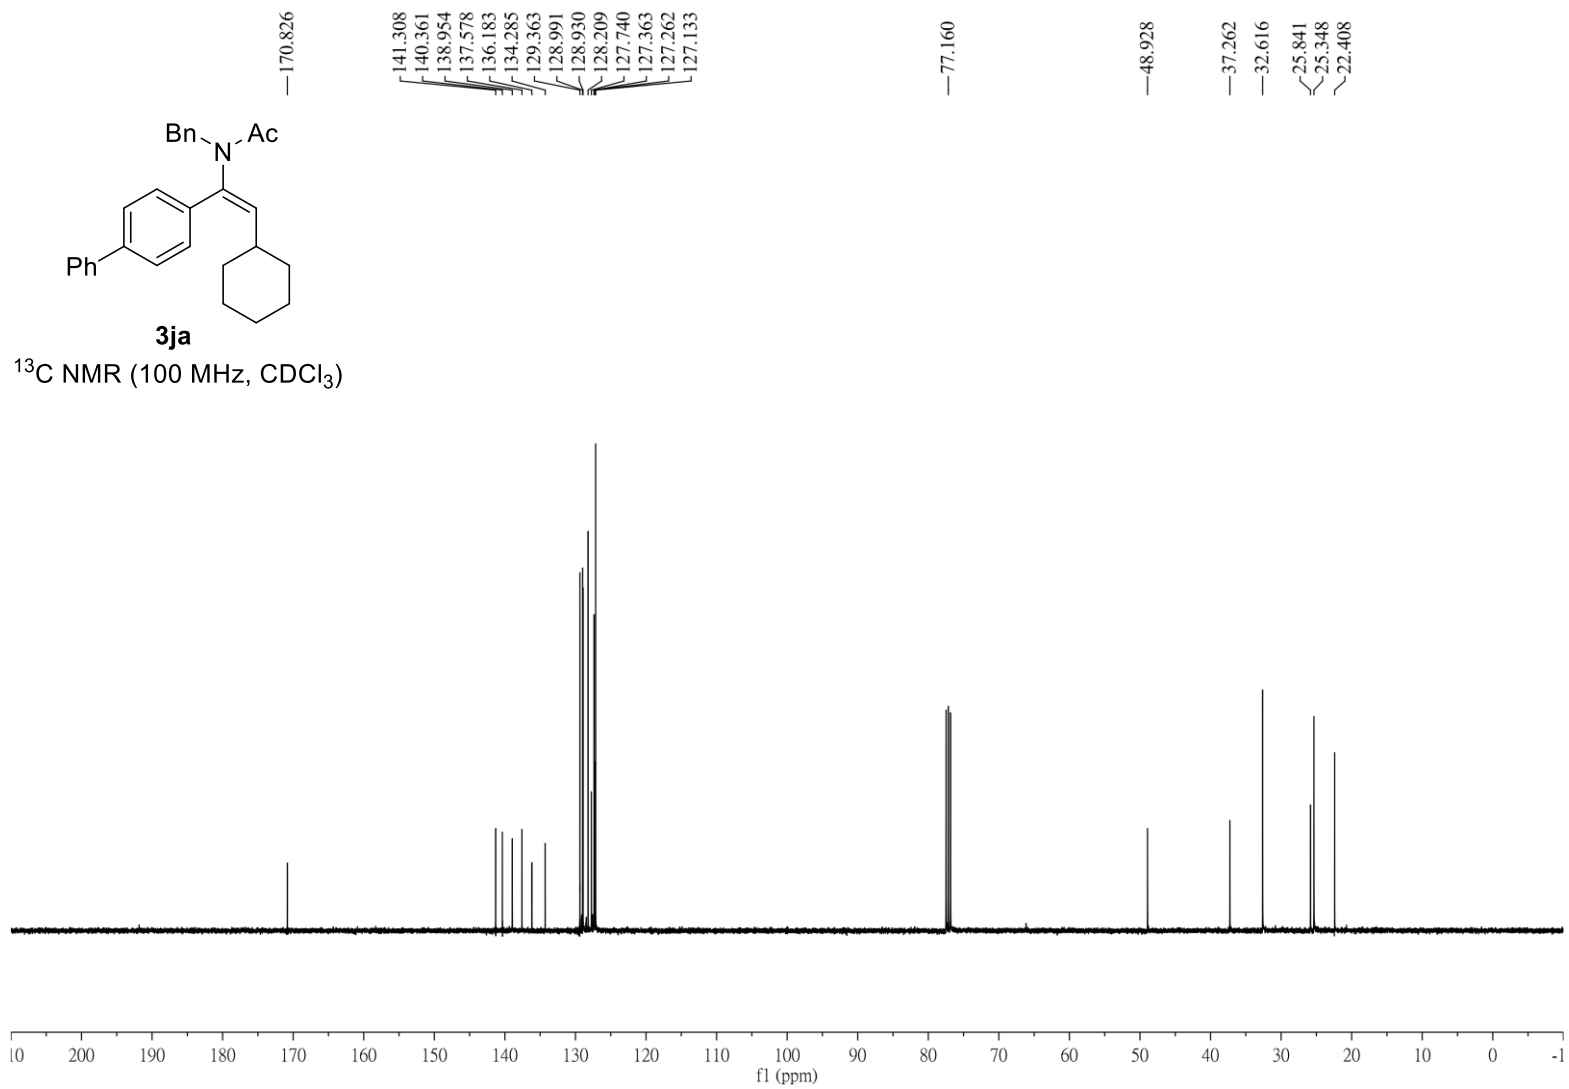

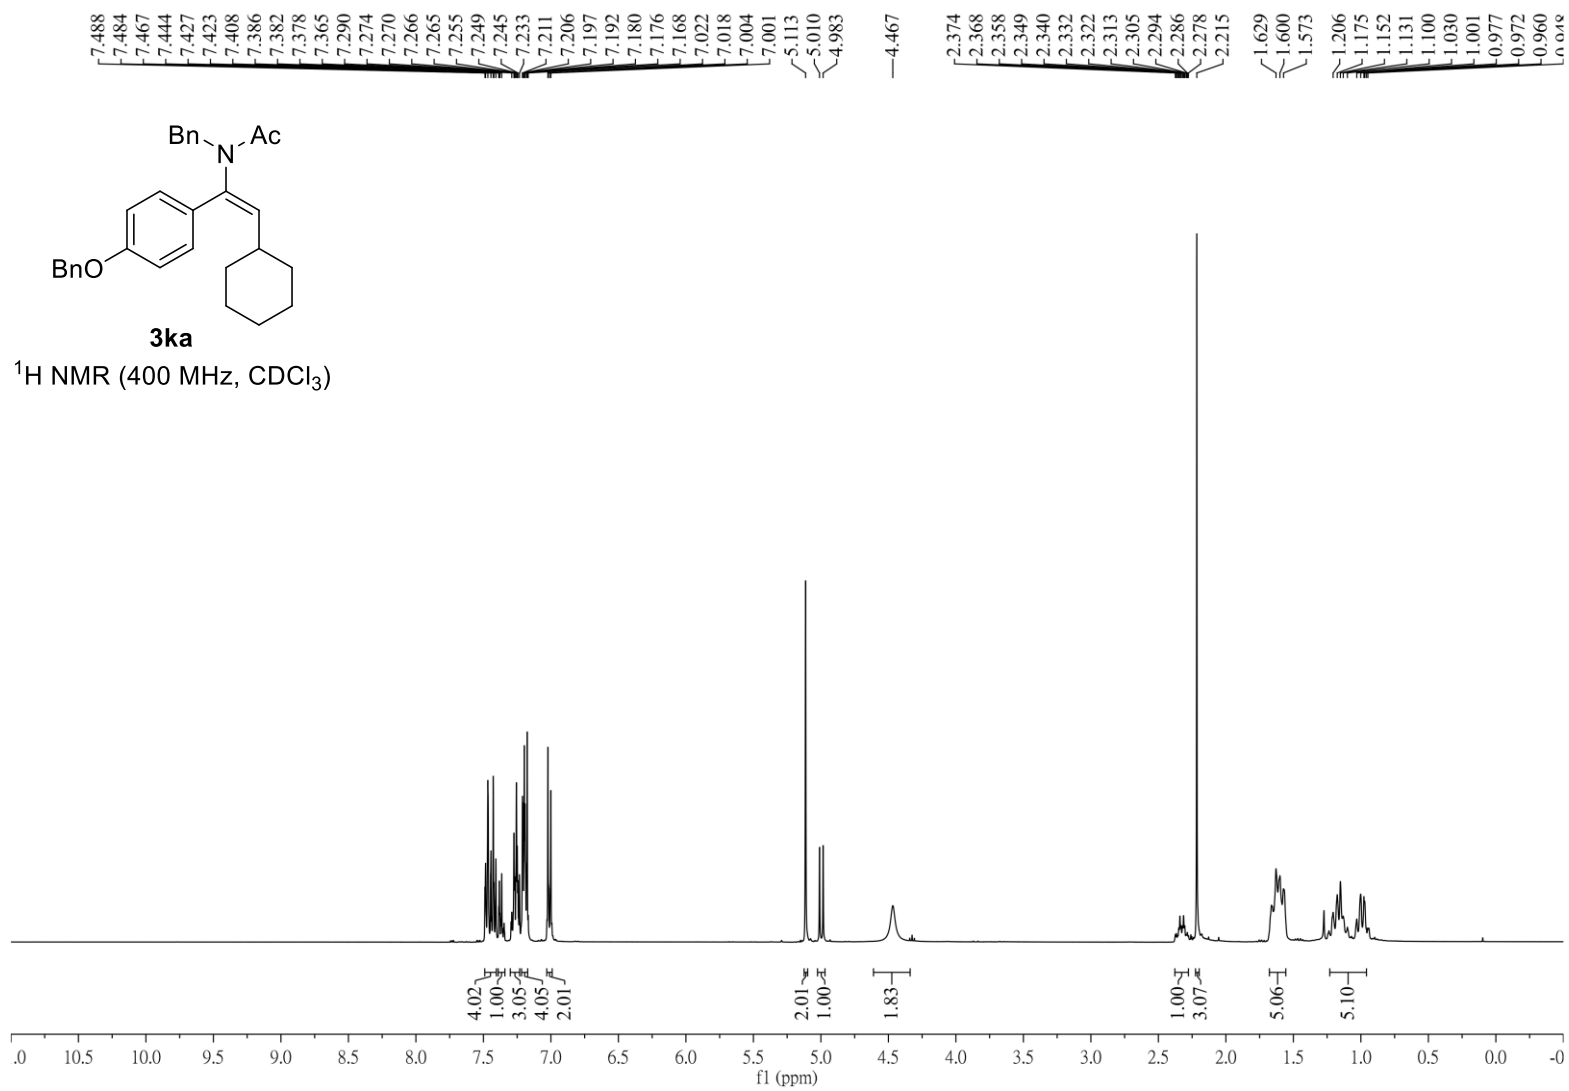

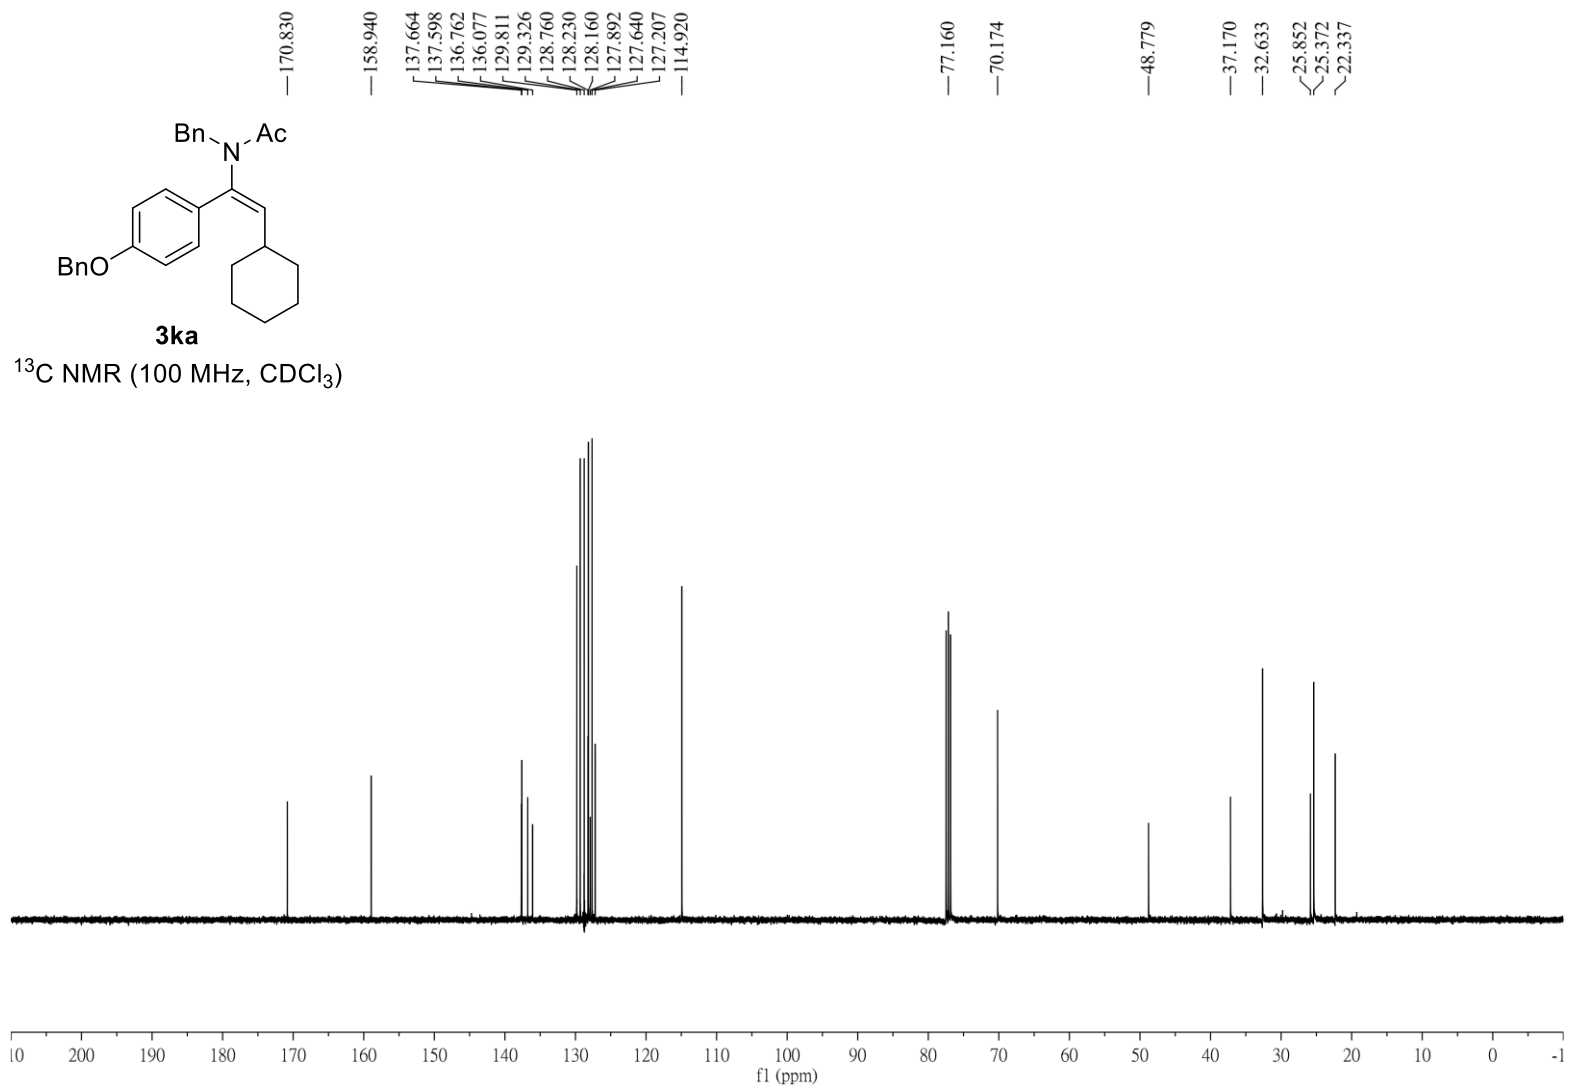

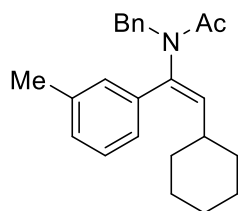

**3la**

$^1\text{H}$  NMR (400 MHz,  $\text{CDCl}_3$ )

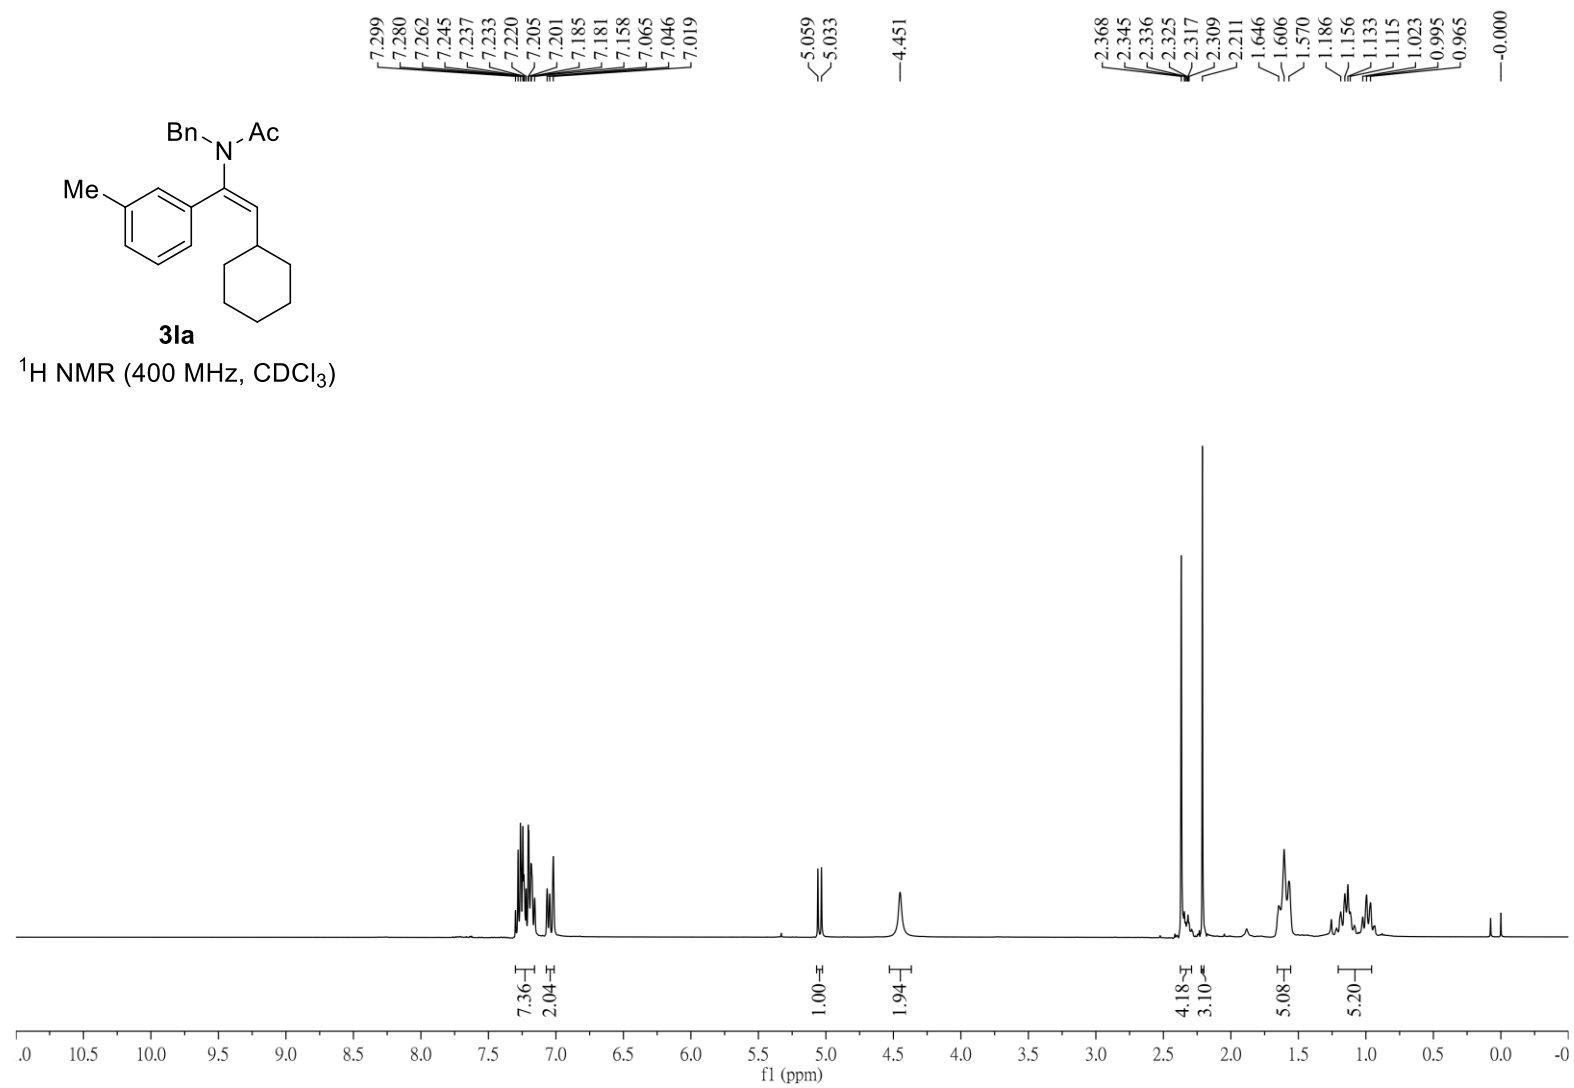

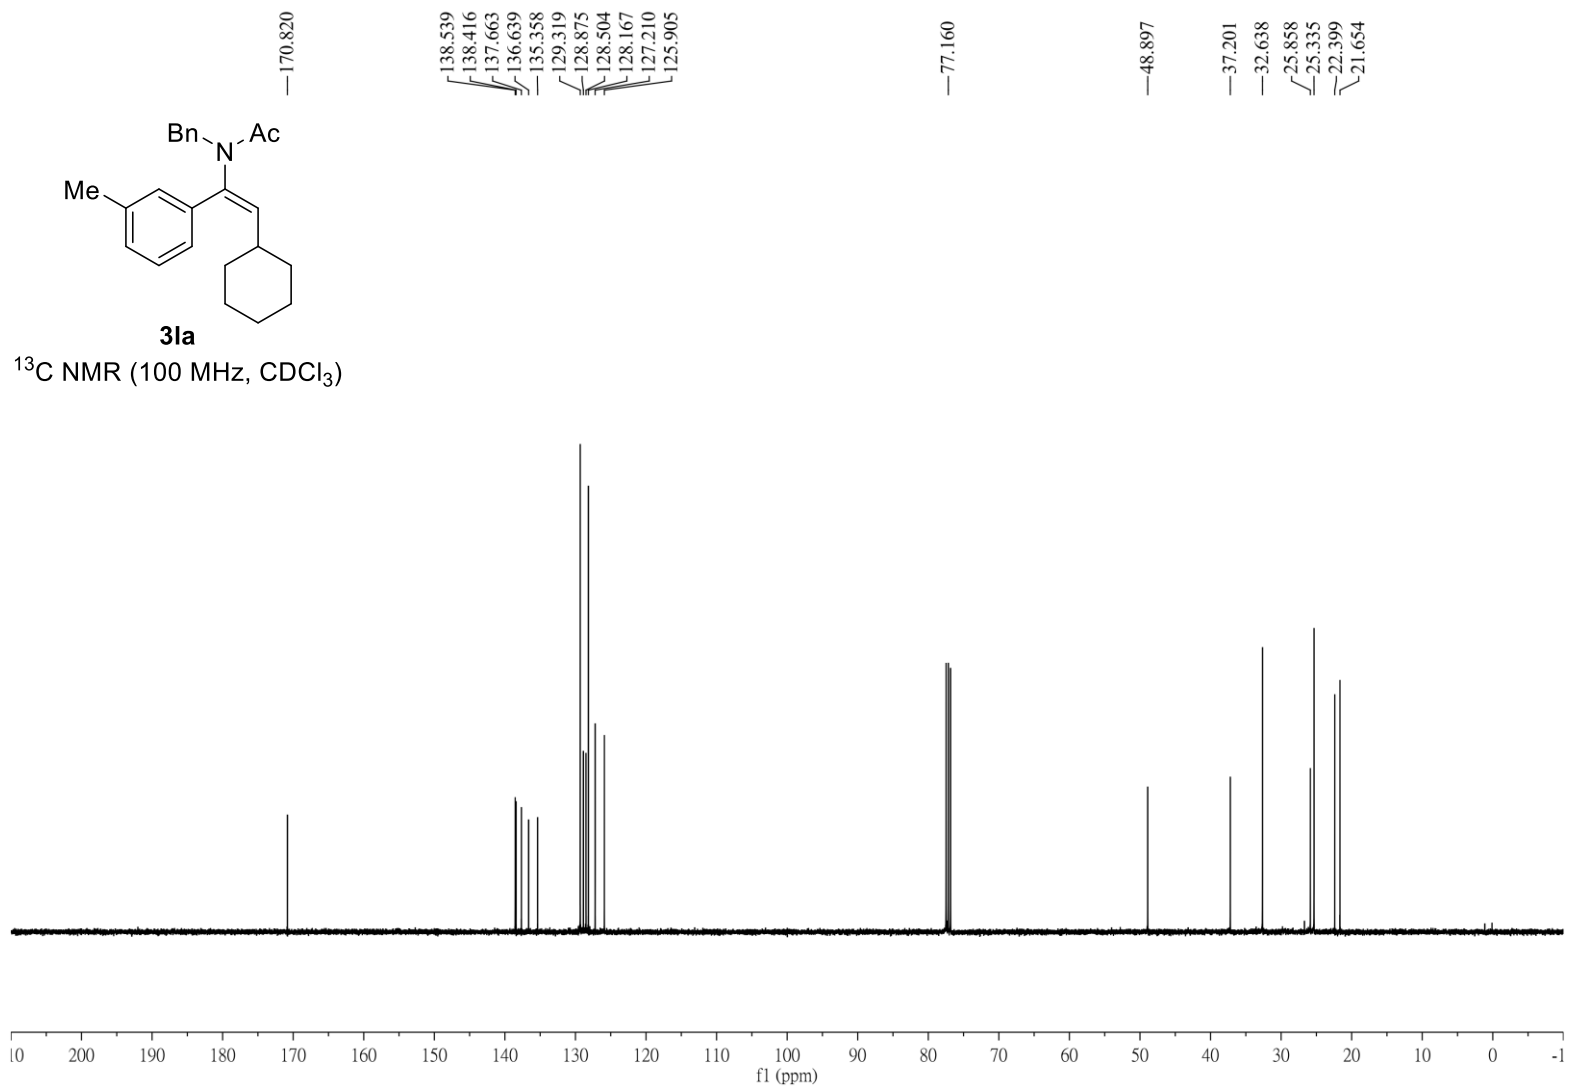

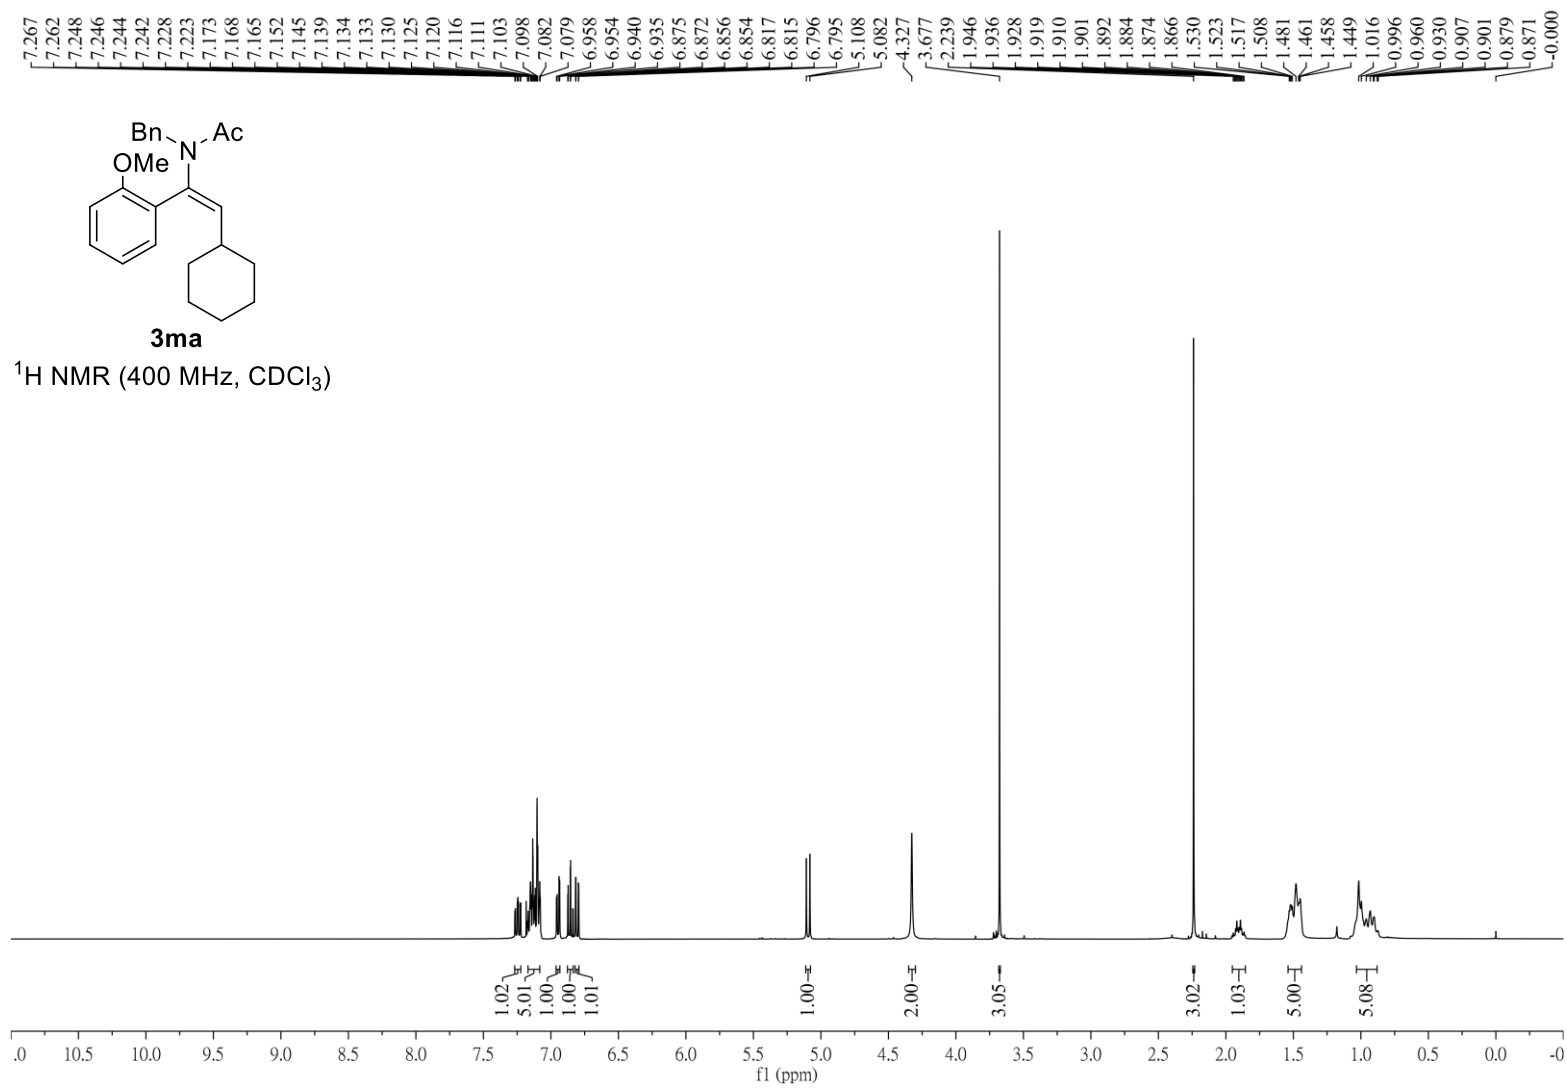

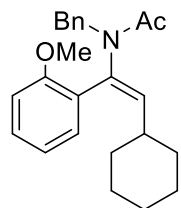

**3ma**

$^{13}\text{C}$  NMR (100 MHz,  $\text{CDCl}_3$ )

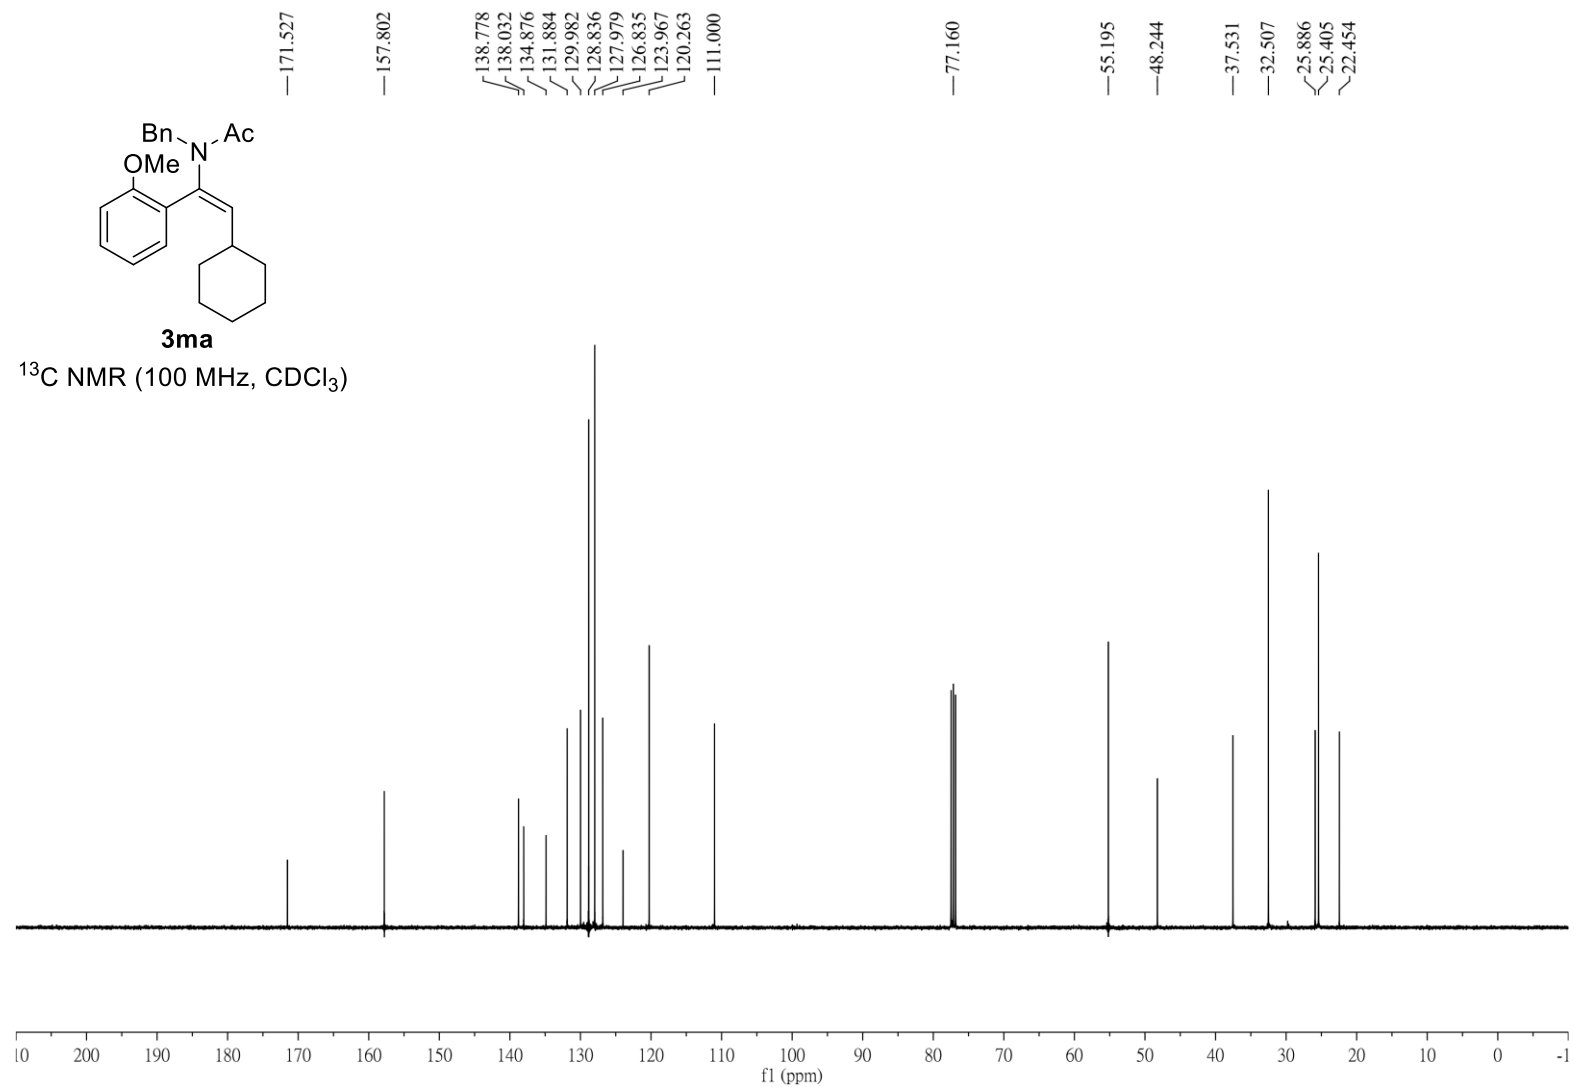



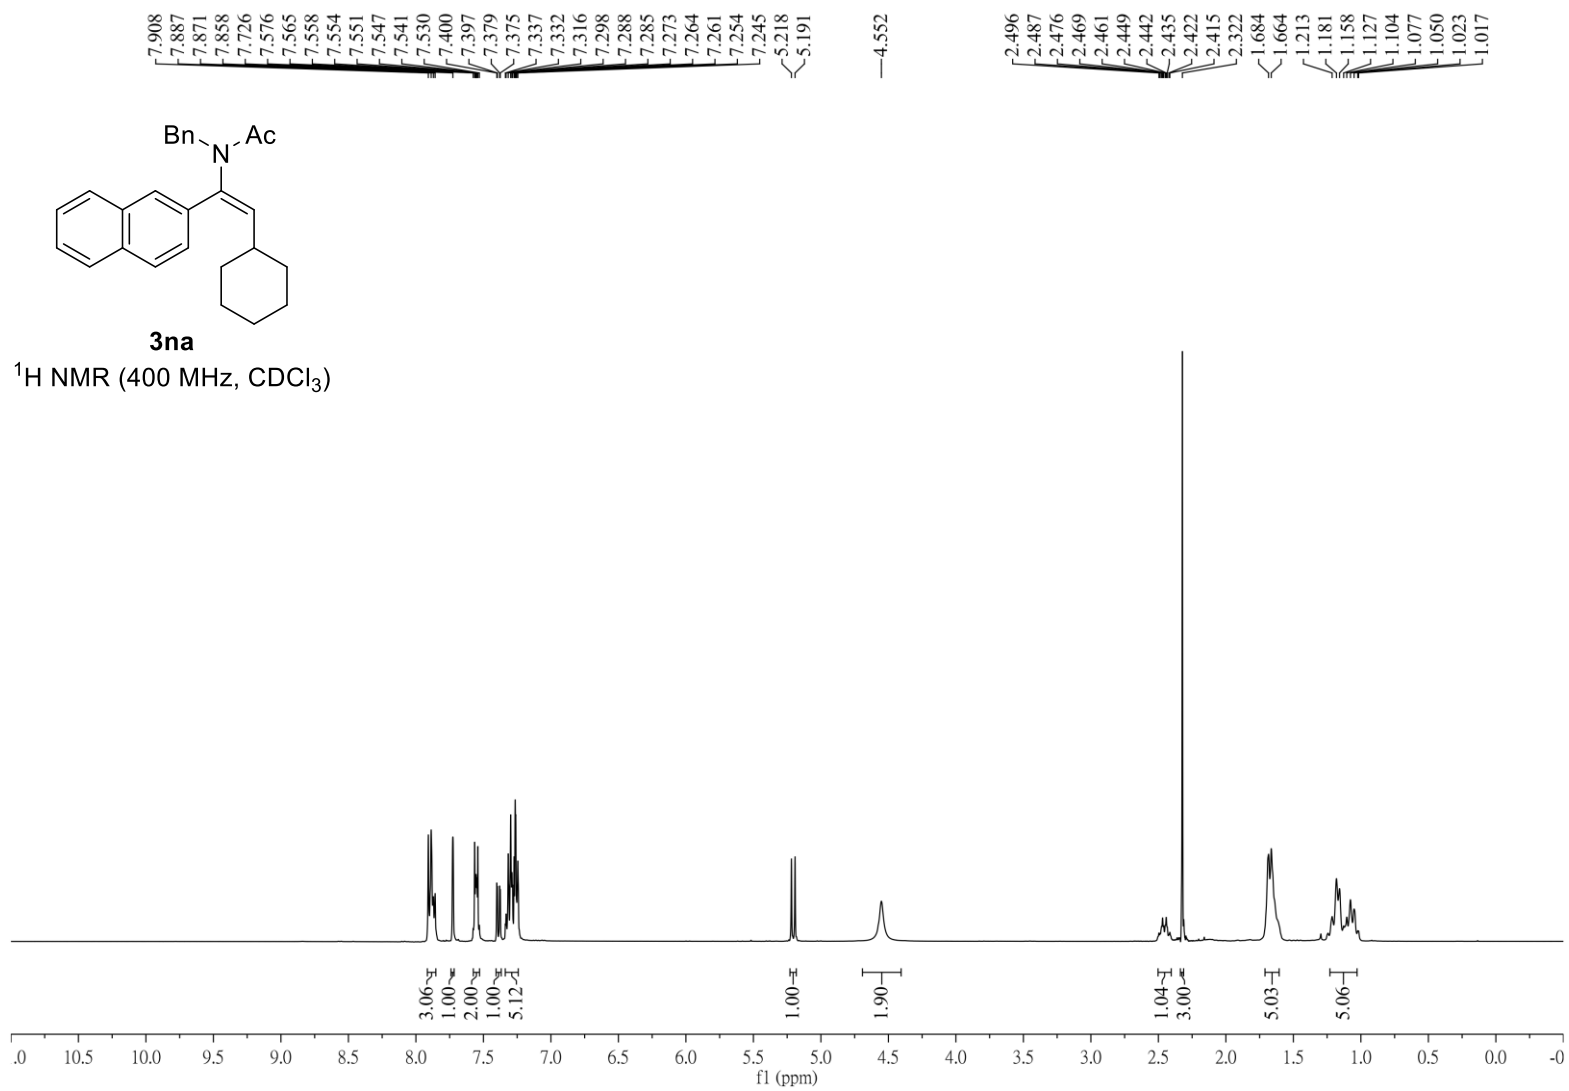

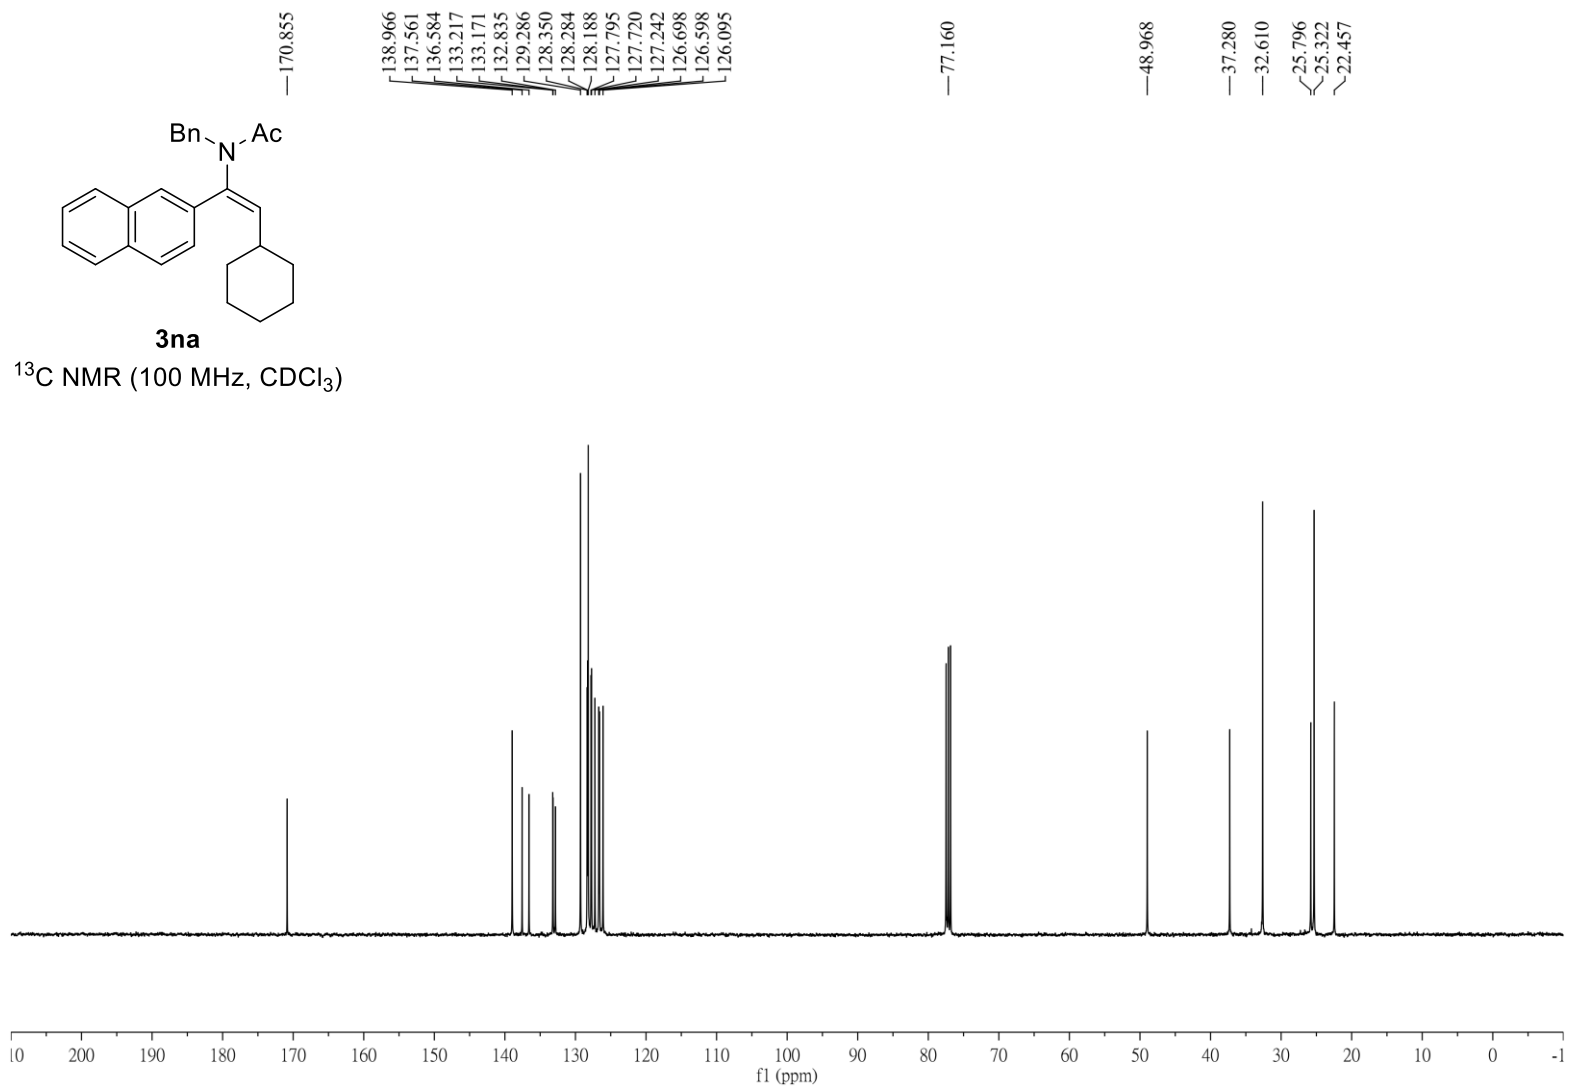

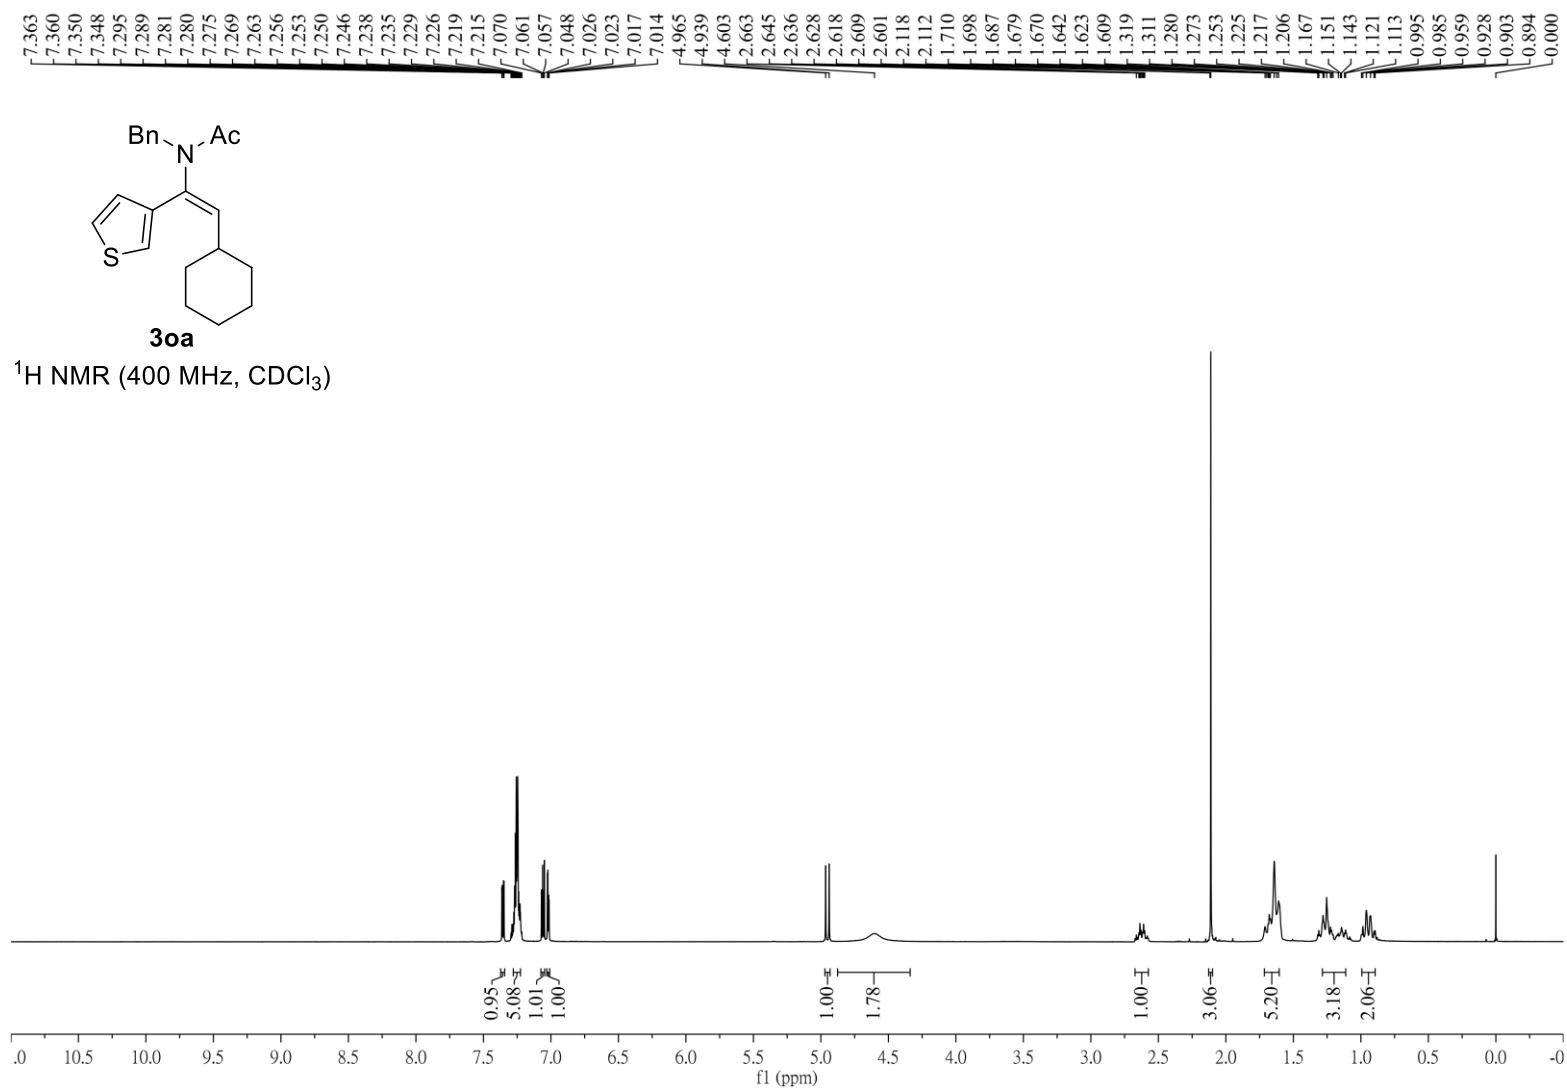

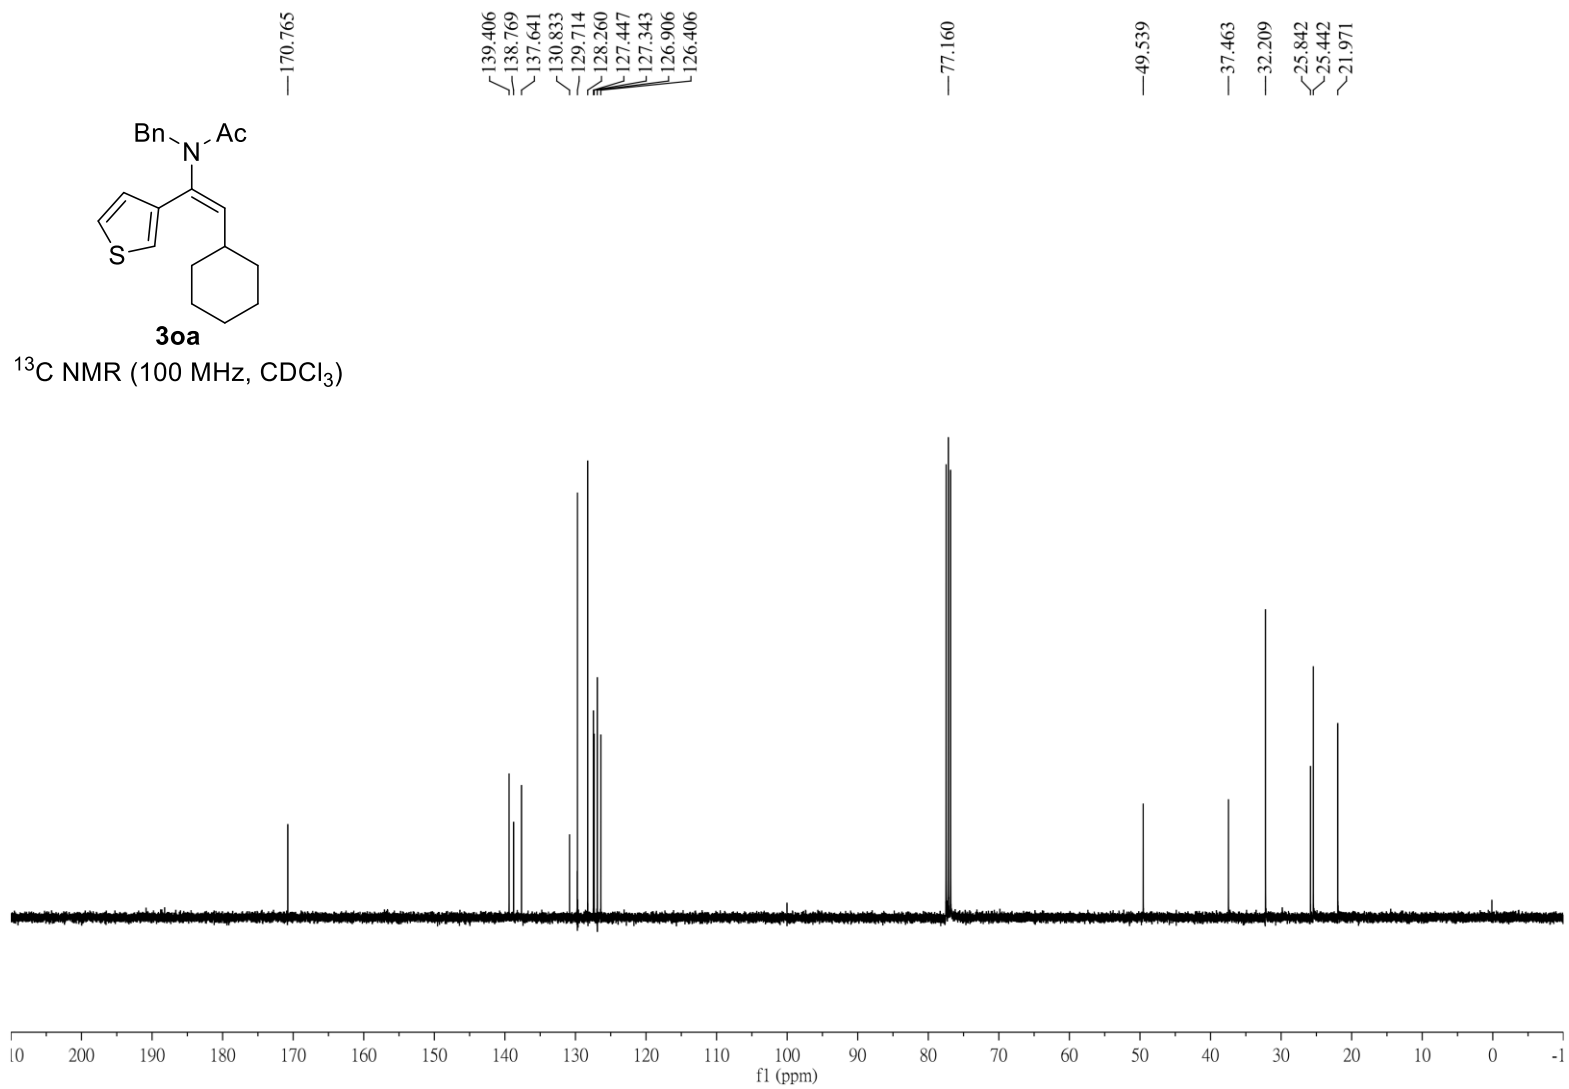

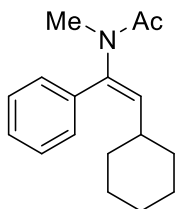

**3pa**

$^1\text{H}$  NMR (400 MHz,  $\text{CDCl}_3$ )

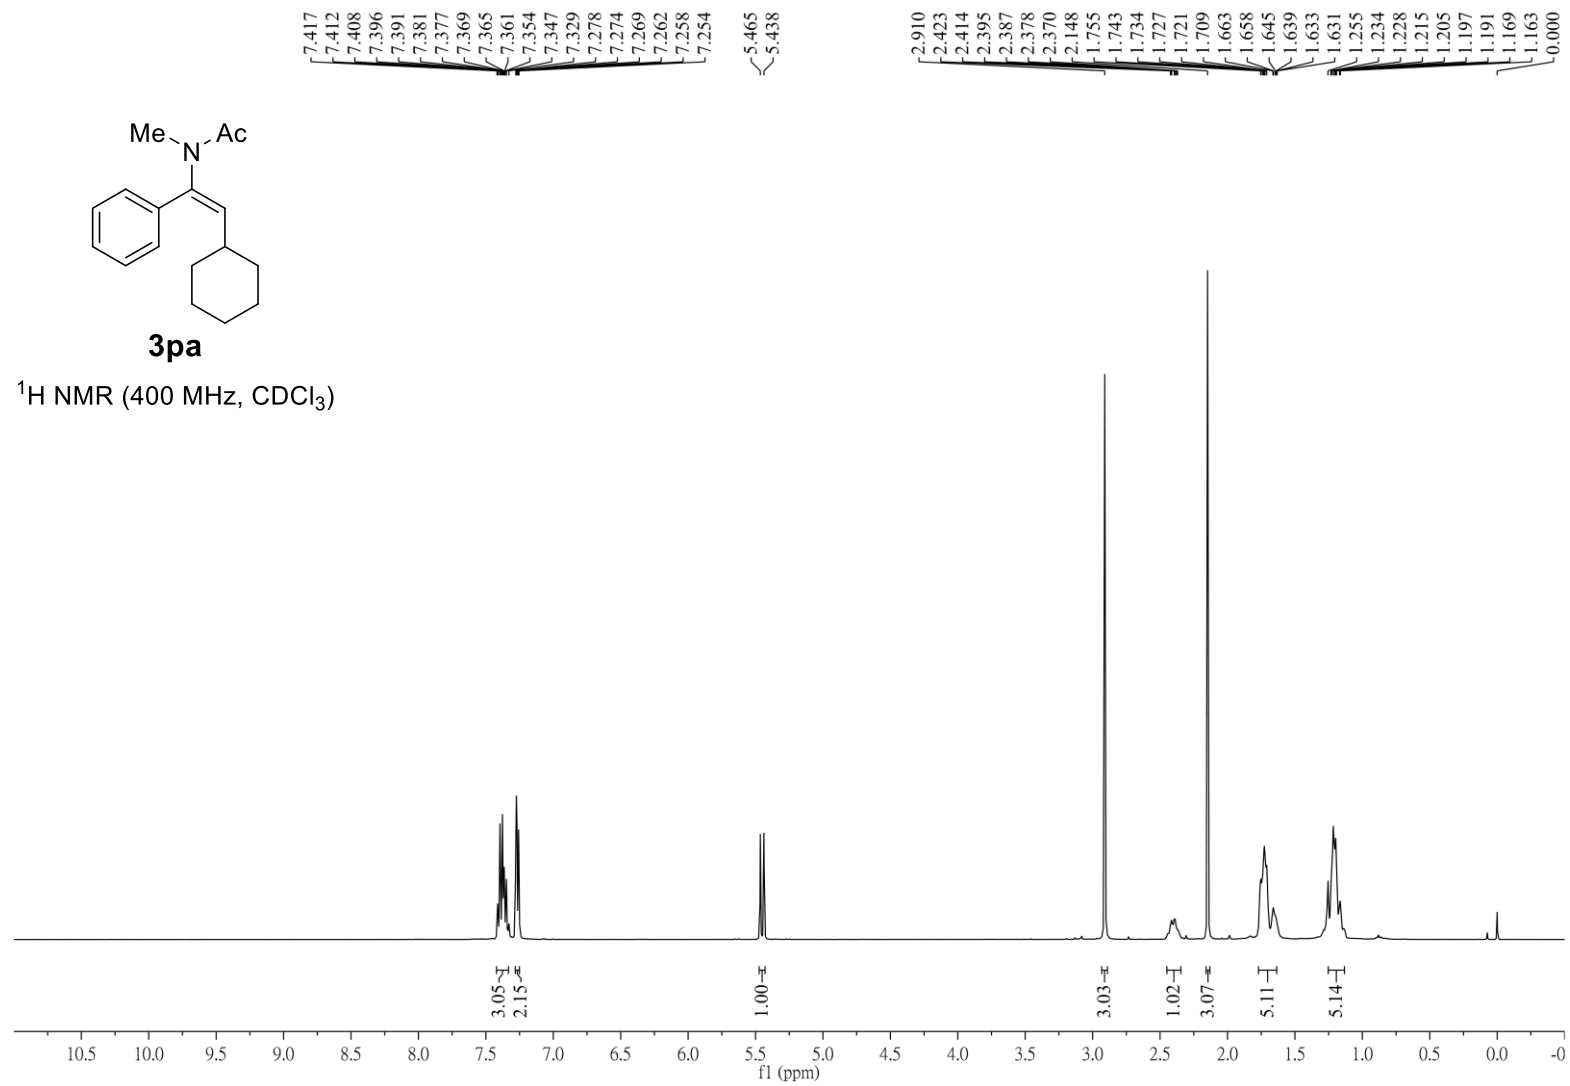

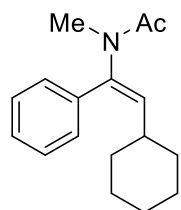

**3pa**

$^{13}\text{C}$  NMR (100 MHz,  $\text{CDCl}_3$ )

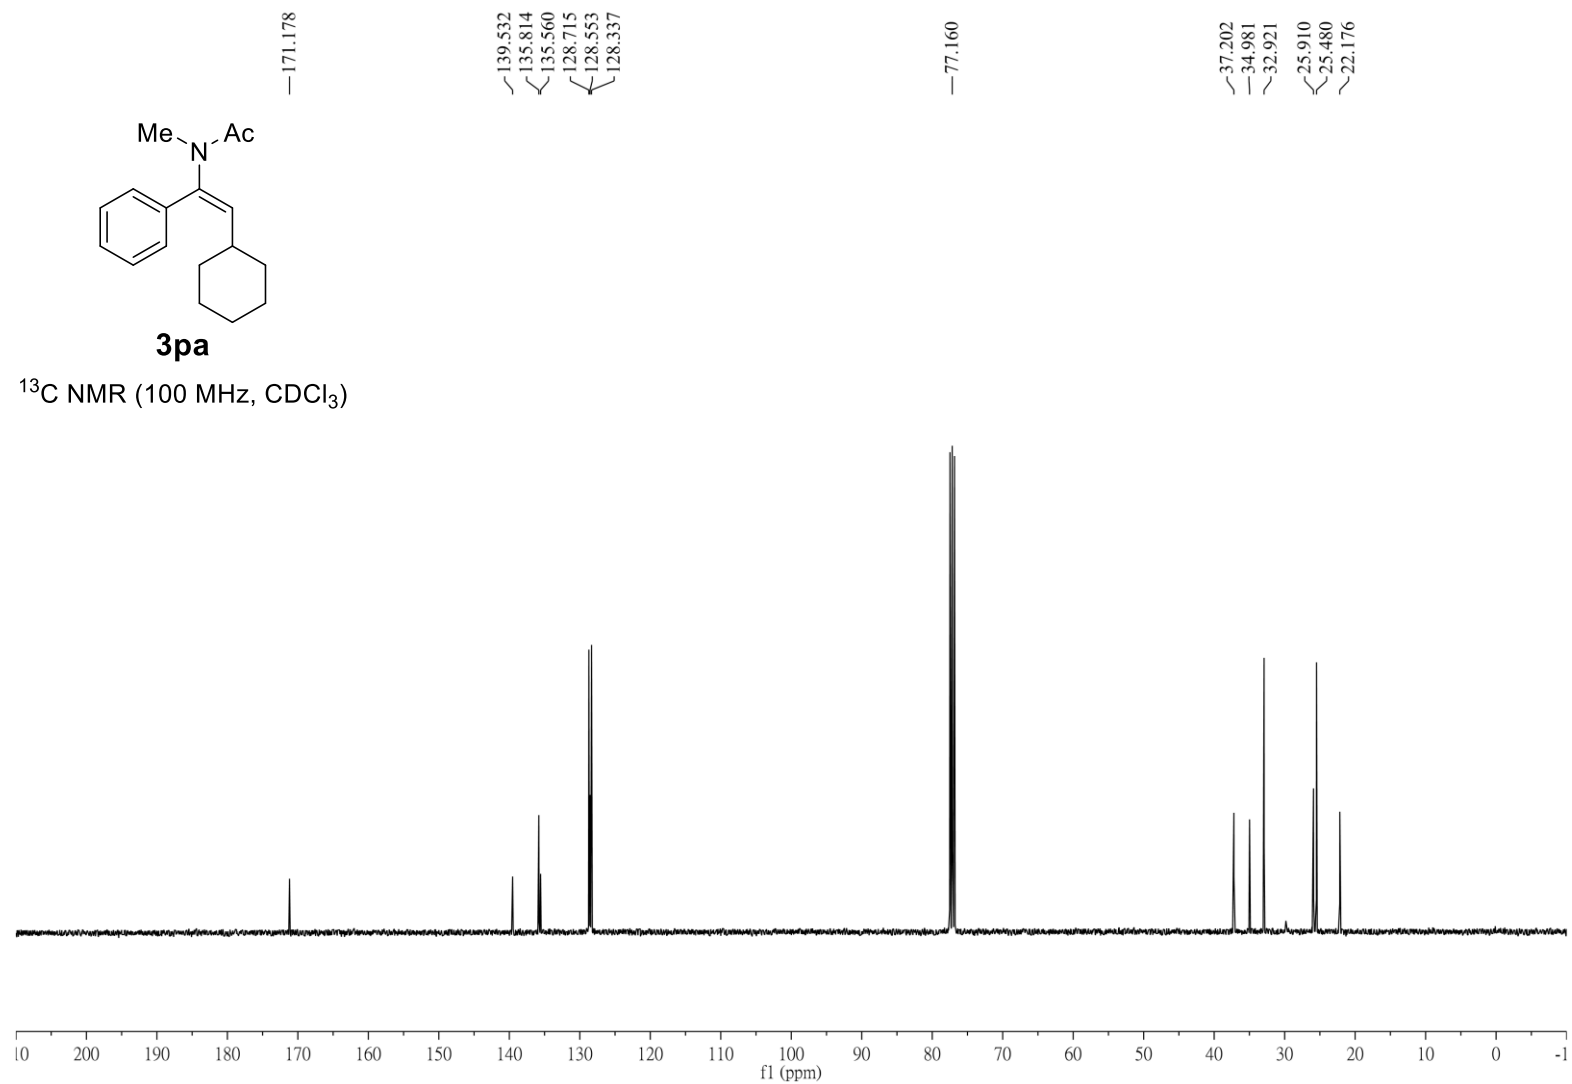

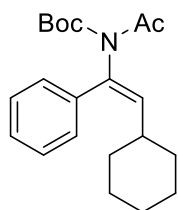

**3qa**

<sup>1</sup>H NMR (400 MHz, CDCl<sub>3</sub>)

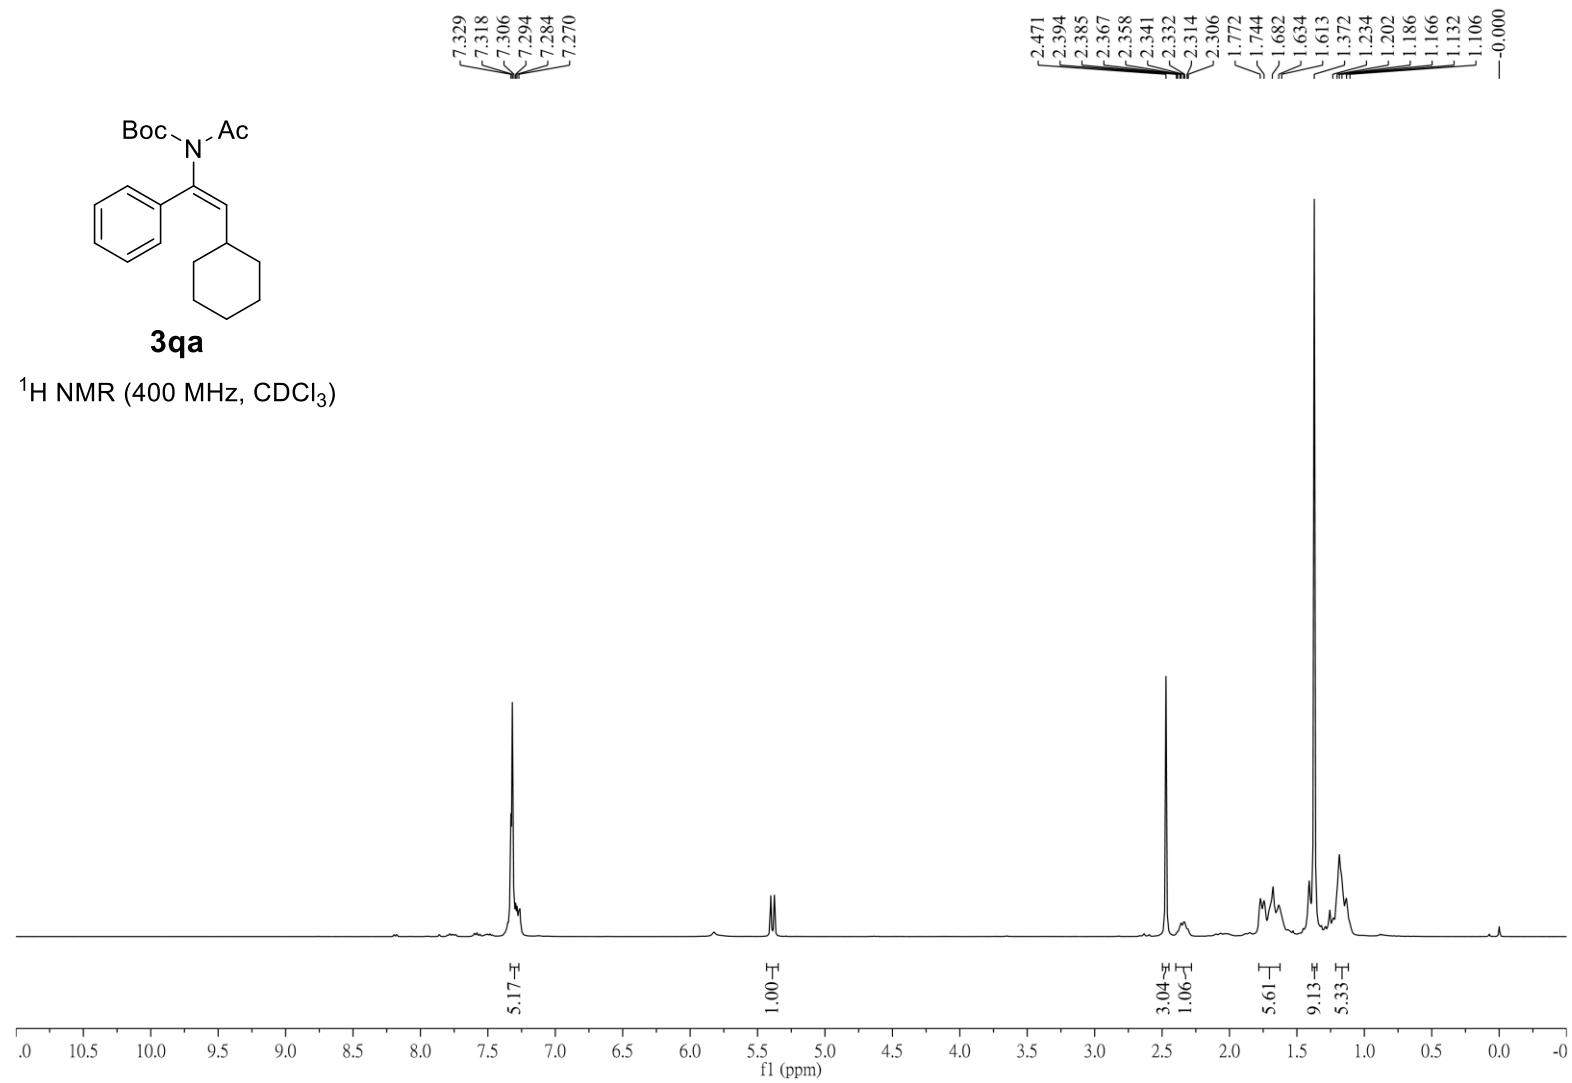

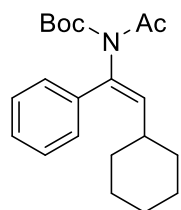

**3qa**

$^{13}\text{C}$  NMR (100 MHz,  $\text{CDCl}_3$ )

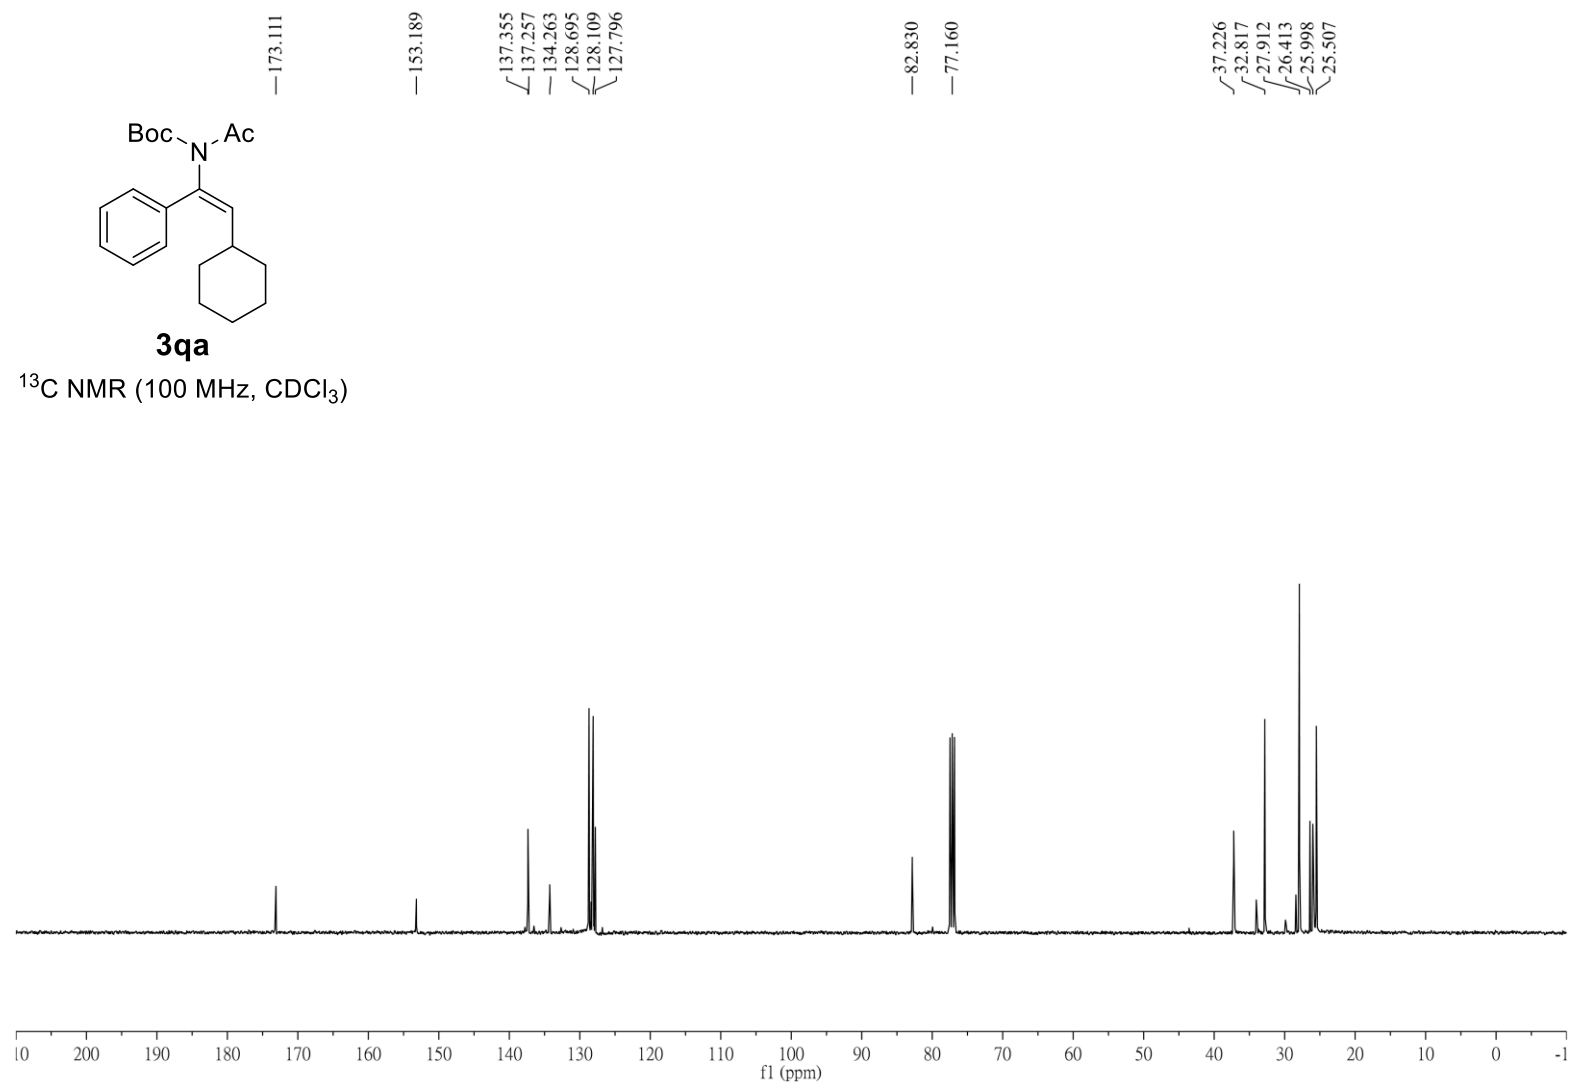



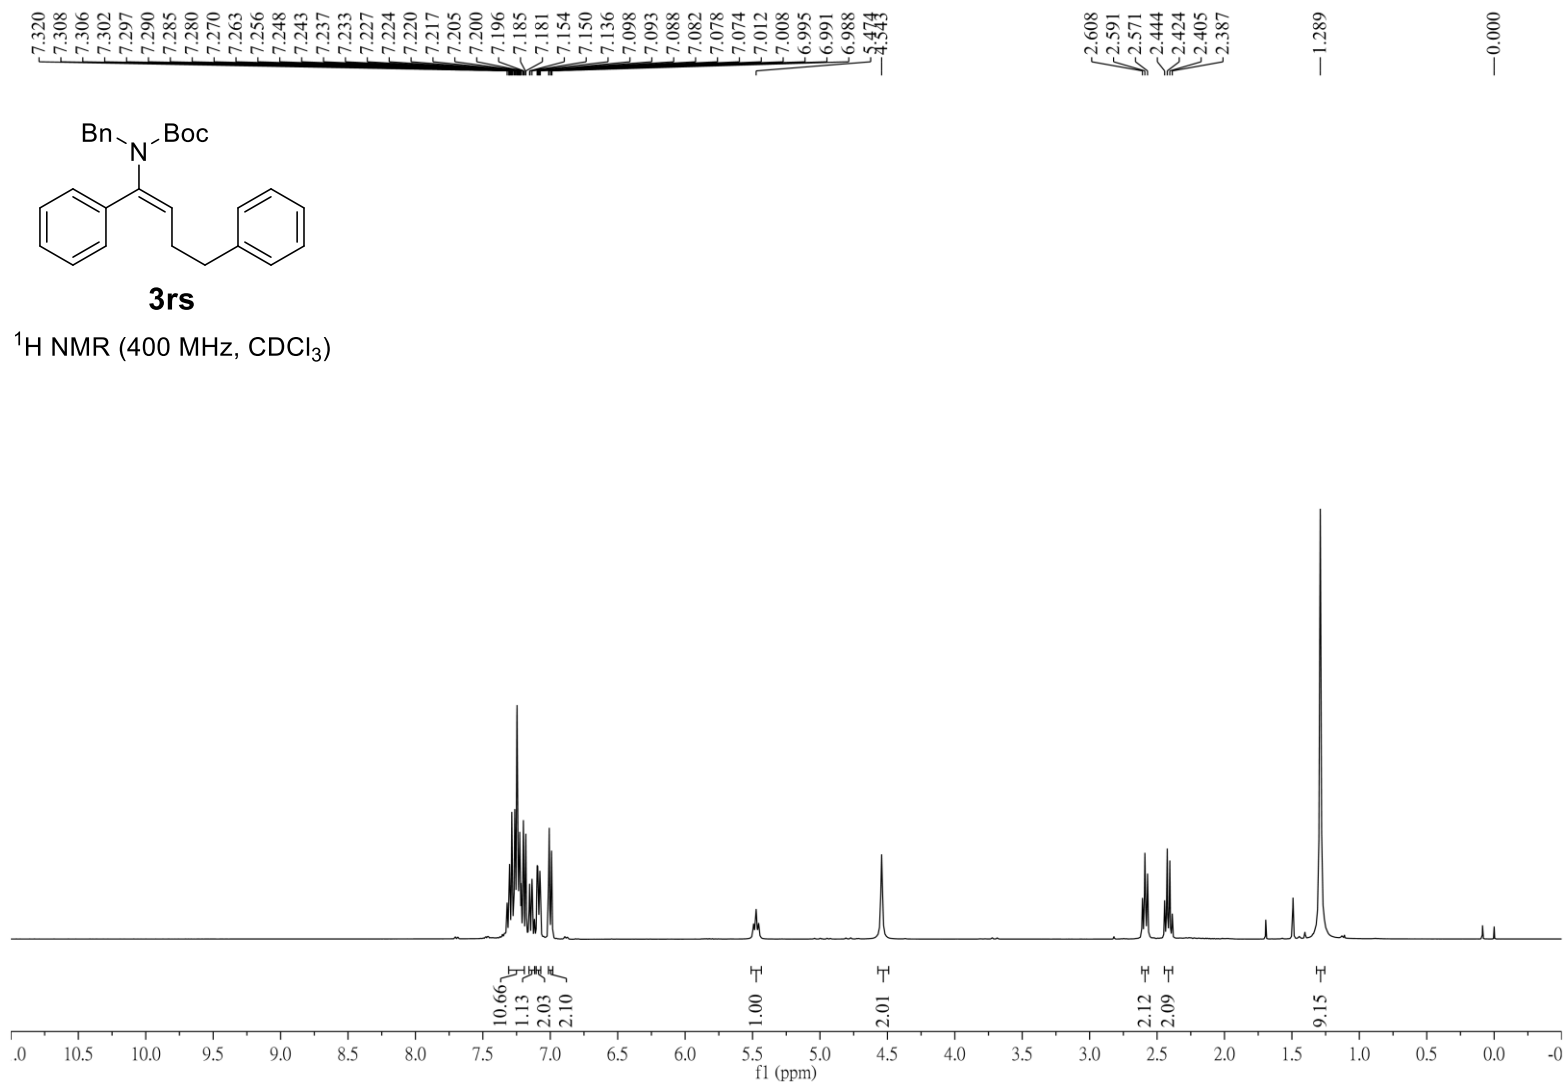

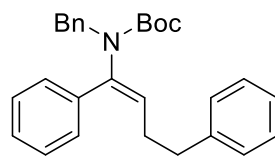

**3rs**

$^{13}\text{C}$  NMR (100 MHz,  $\text{CDCl}_3$ )

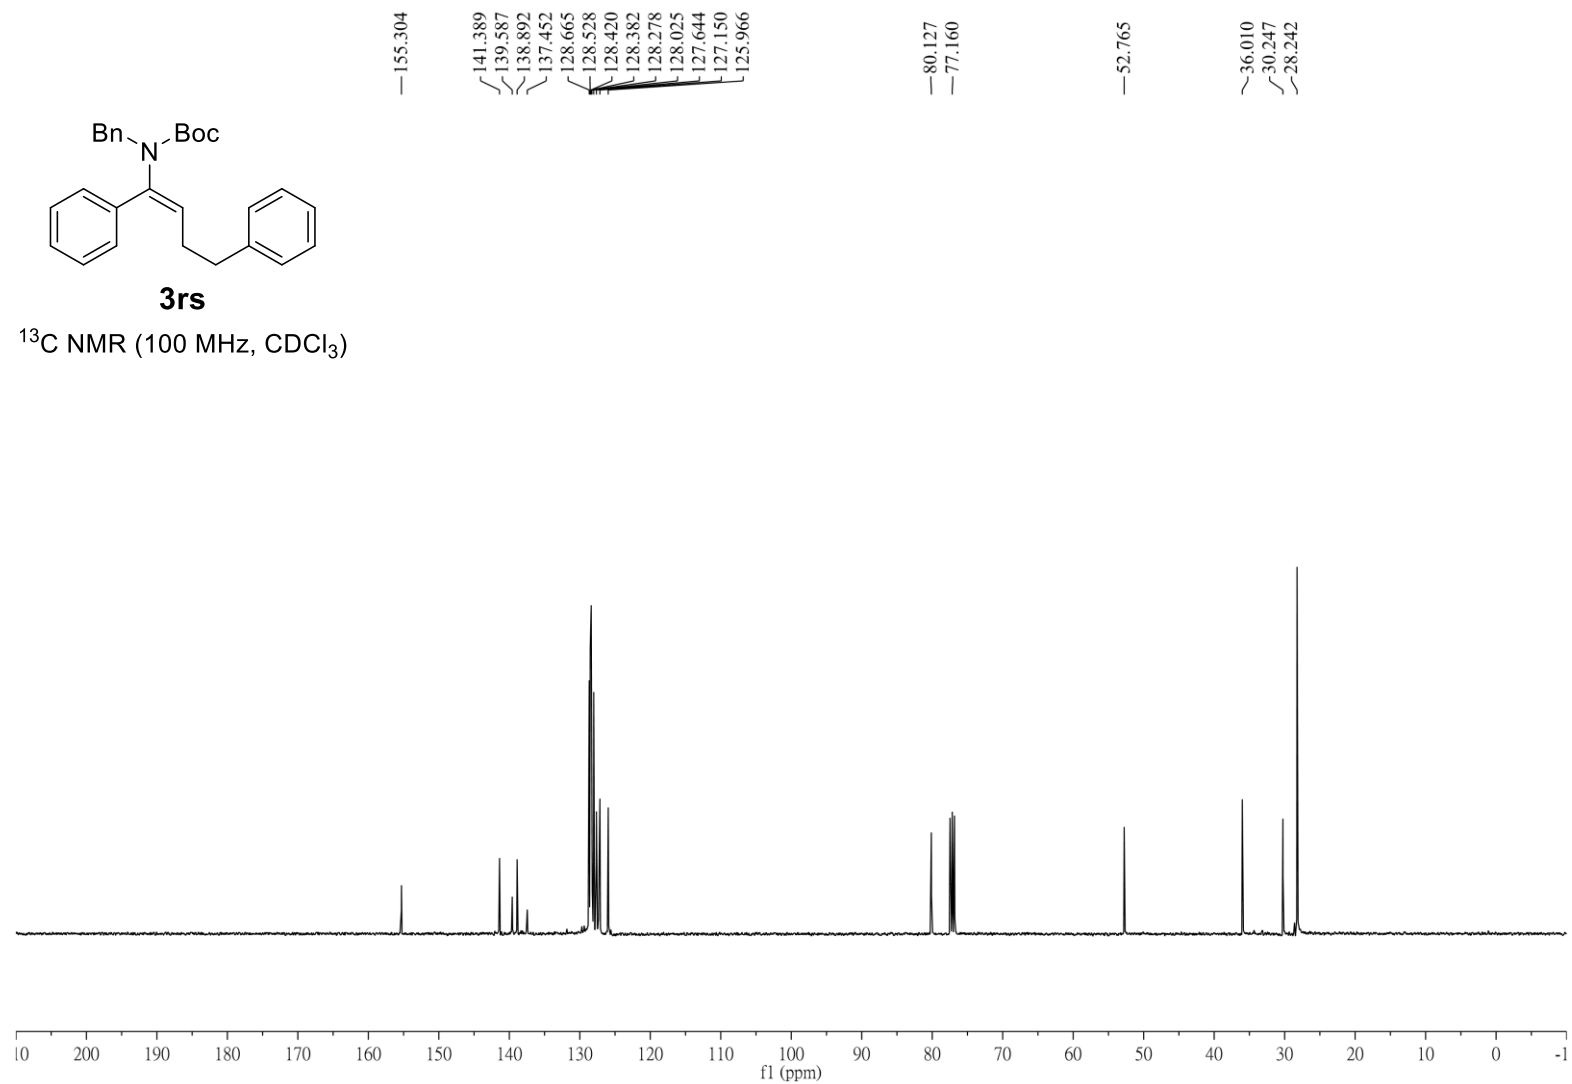

7.319  
7.313  
7.308  
7.304  
7.297  
7.293  
7.280  
7.276  
7.270  
7.260  
7.253  
7.244  
7.220  
7.214  
7.208  
7.199  
7.192  
7.187  
7.178  
7.173  
7.166  
7.158  
7.154  
7.150  
7.143  
7.136  
7.098  
7.089  
7.080  
7.074  
6.980  
6.975  
6.989  
5.486  
— 5.121  
— 4.499  
2.571  
2.552  
2.533  
2.431  
2.412  
2.393  
2.374  
— 0.000

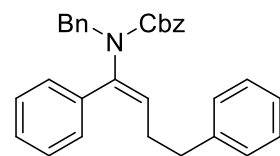

**3ss**

$^1\text{H}$  NMR (400 MHz,  $\text{CDCl}_3$ )

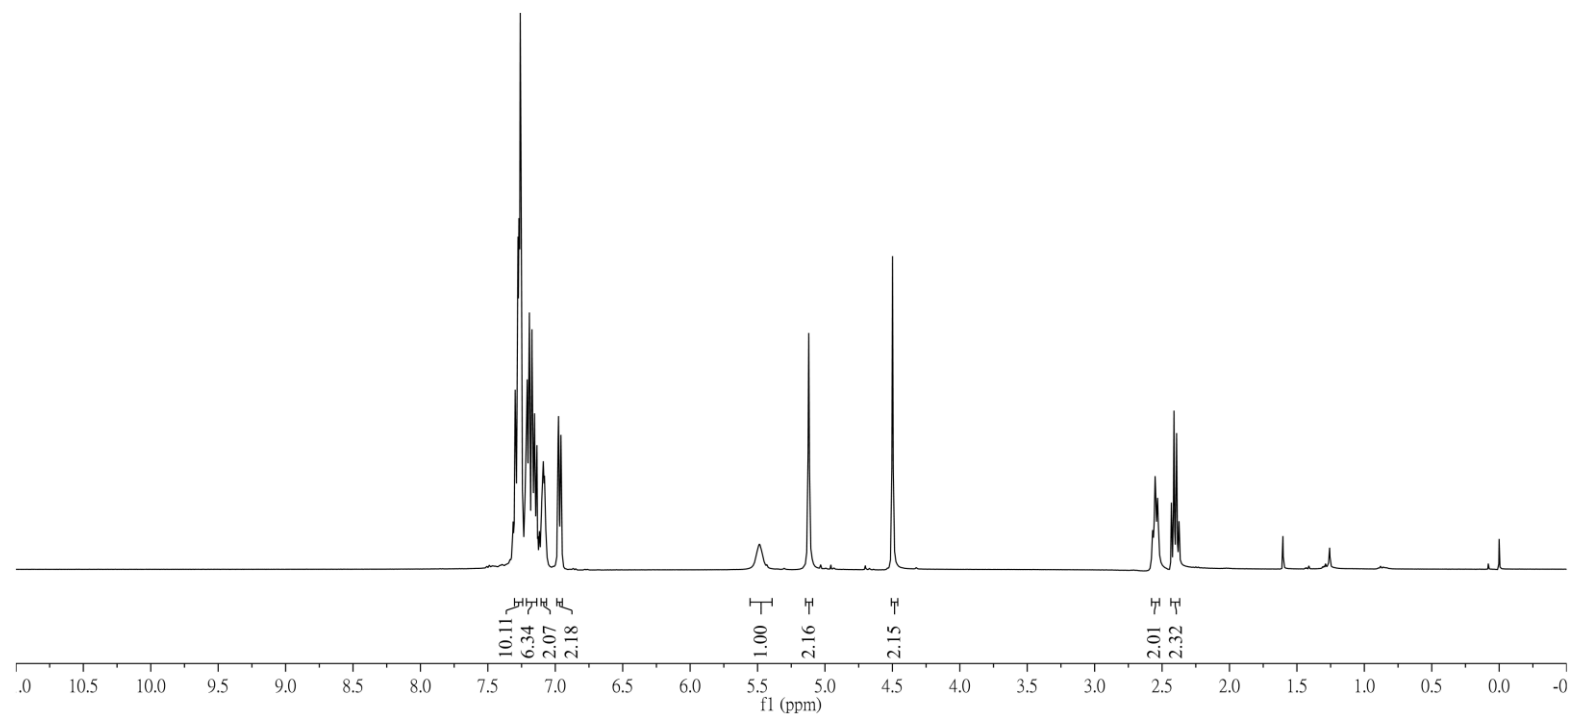

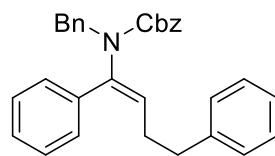

**3ss**

$^{13}\text{C}$  NMR (100 MHz,  $\text{CDCl}_3$ )

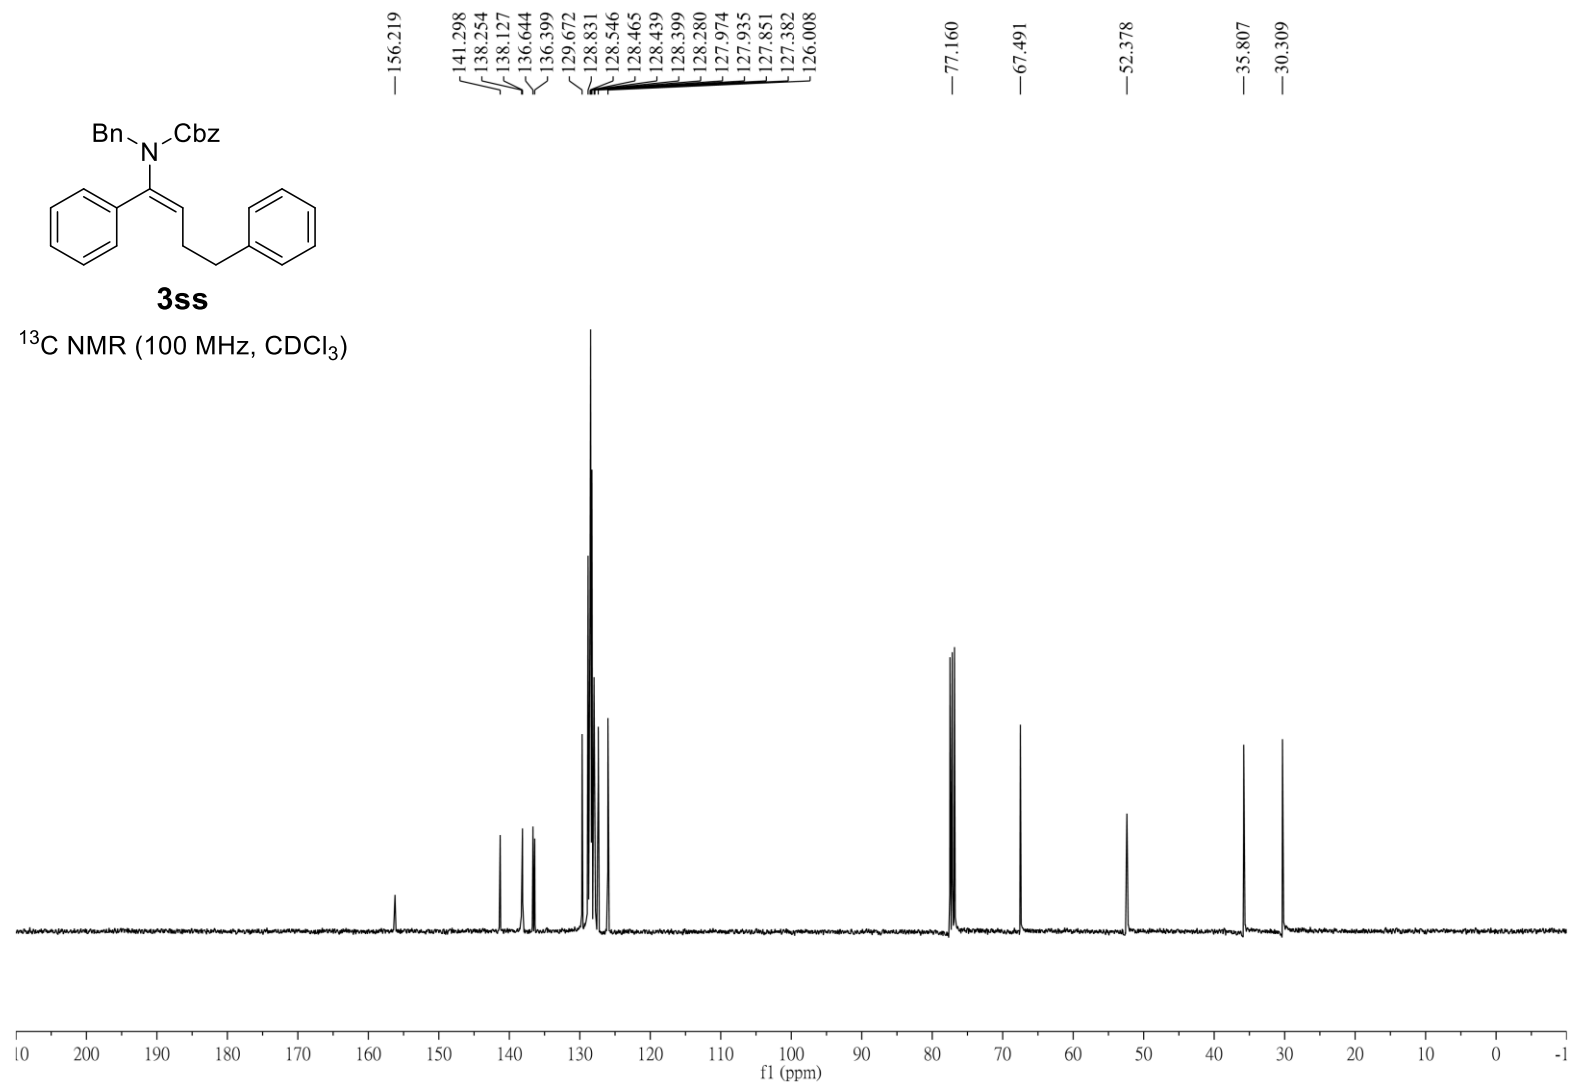

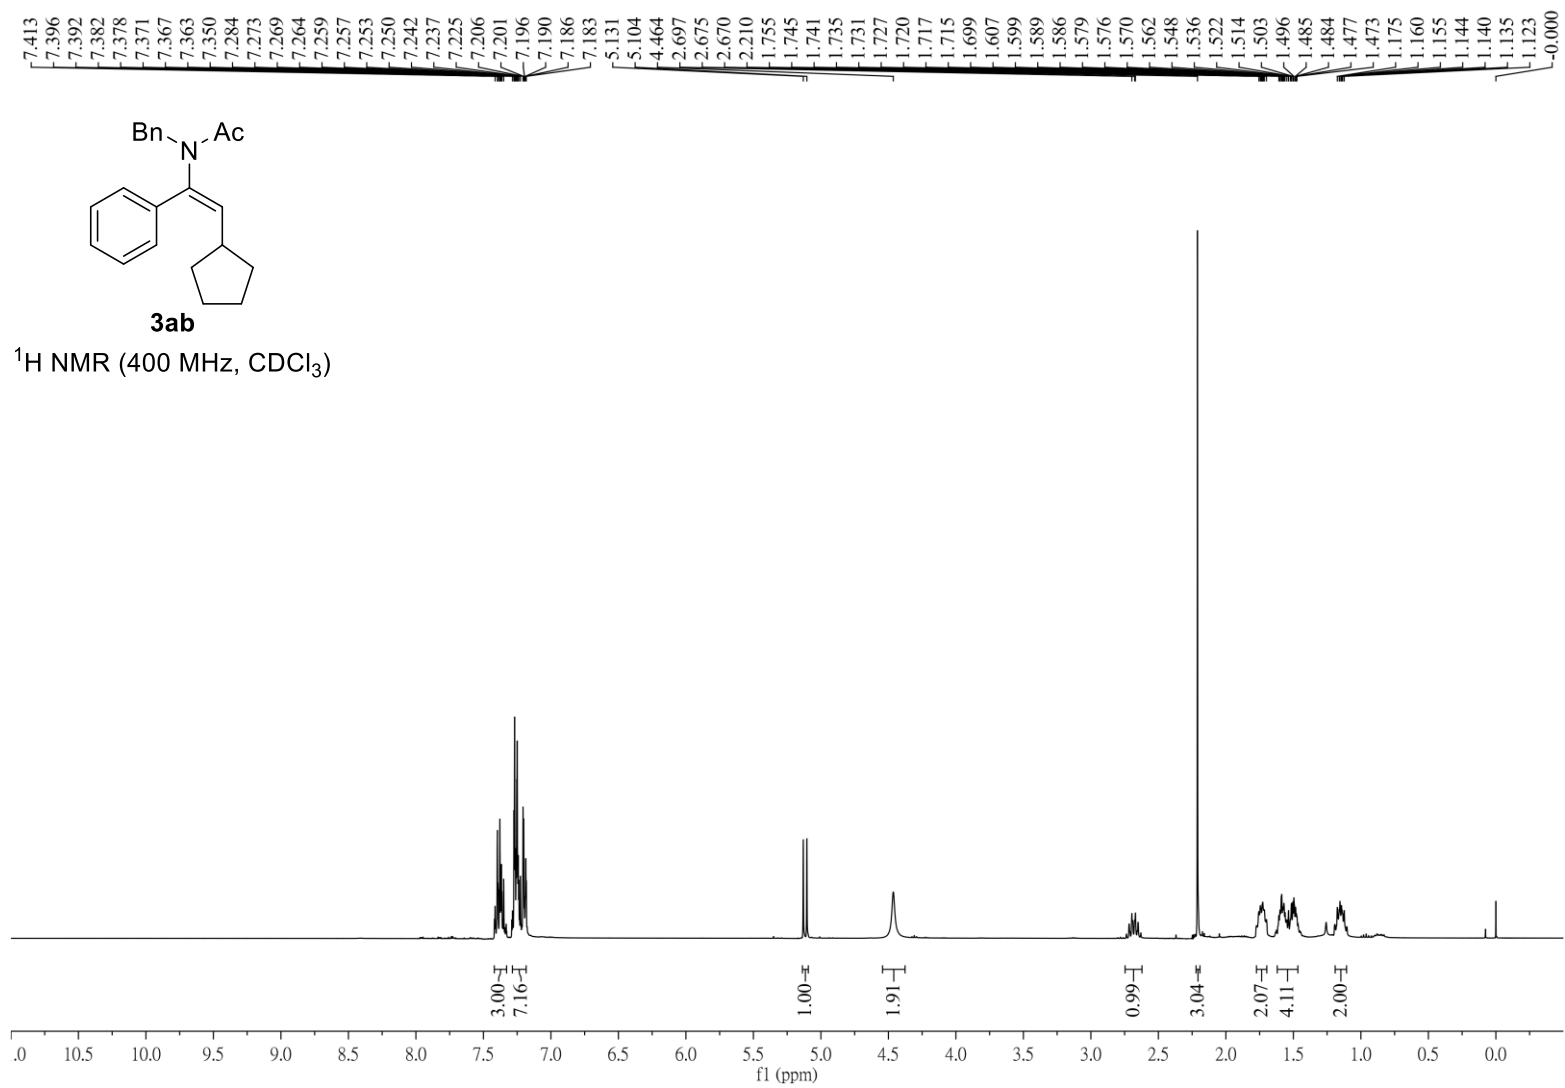

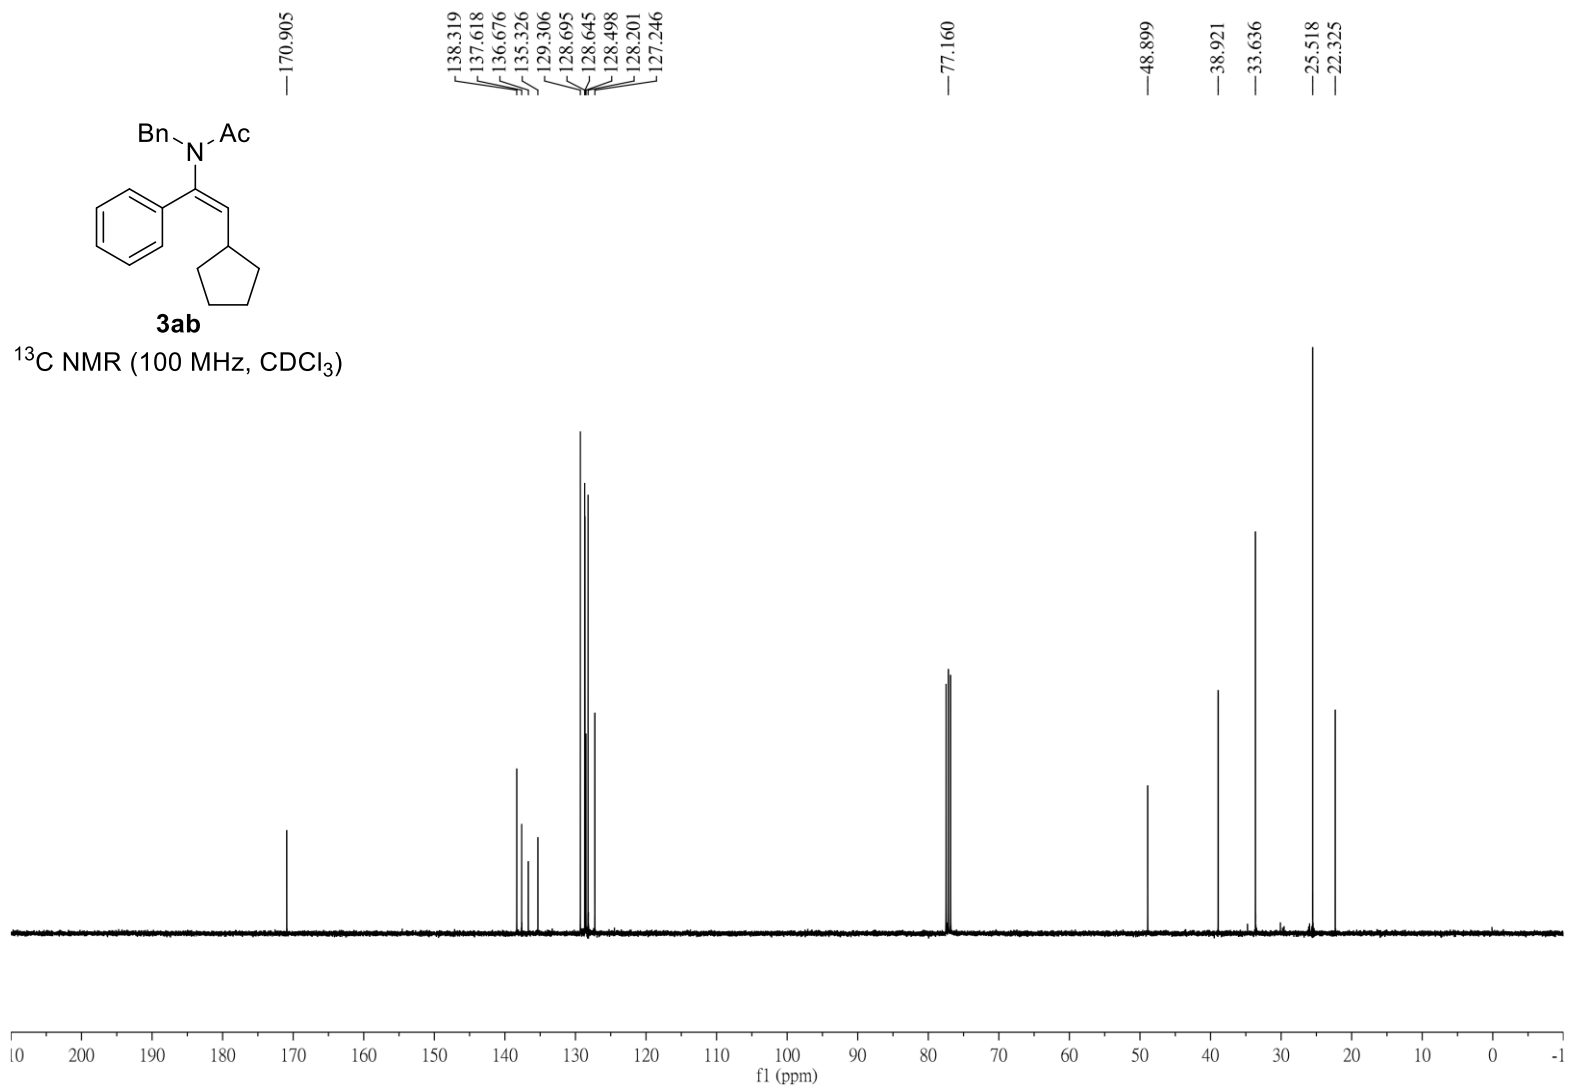

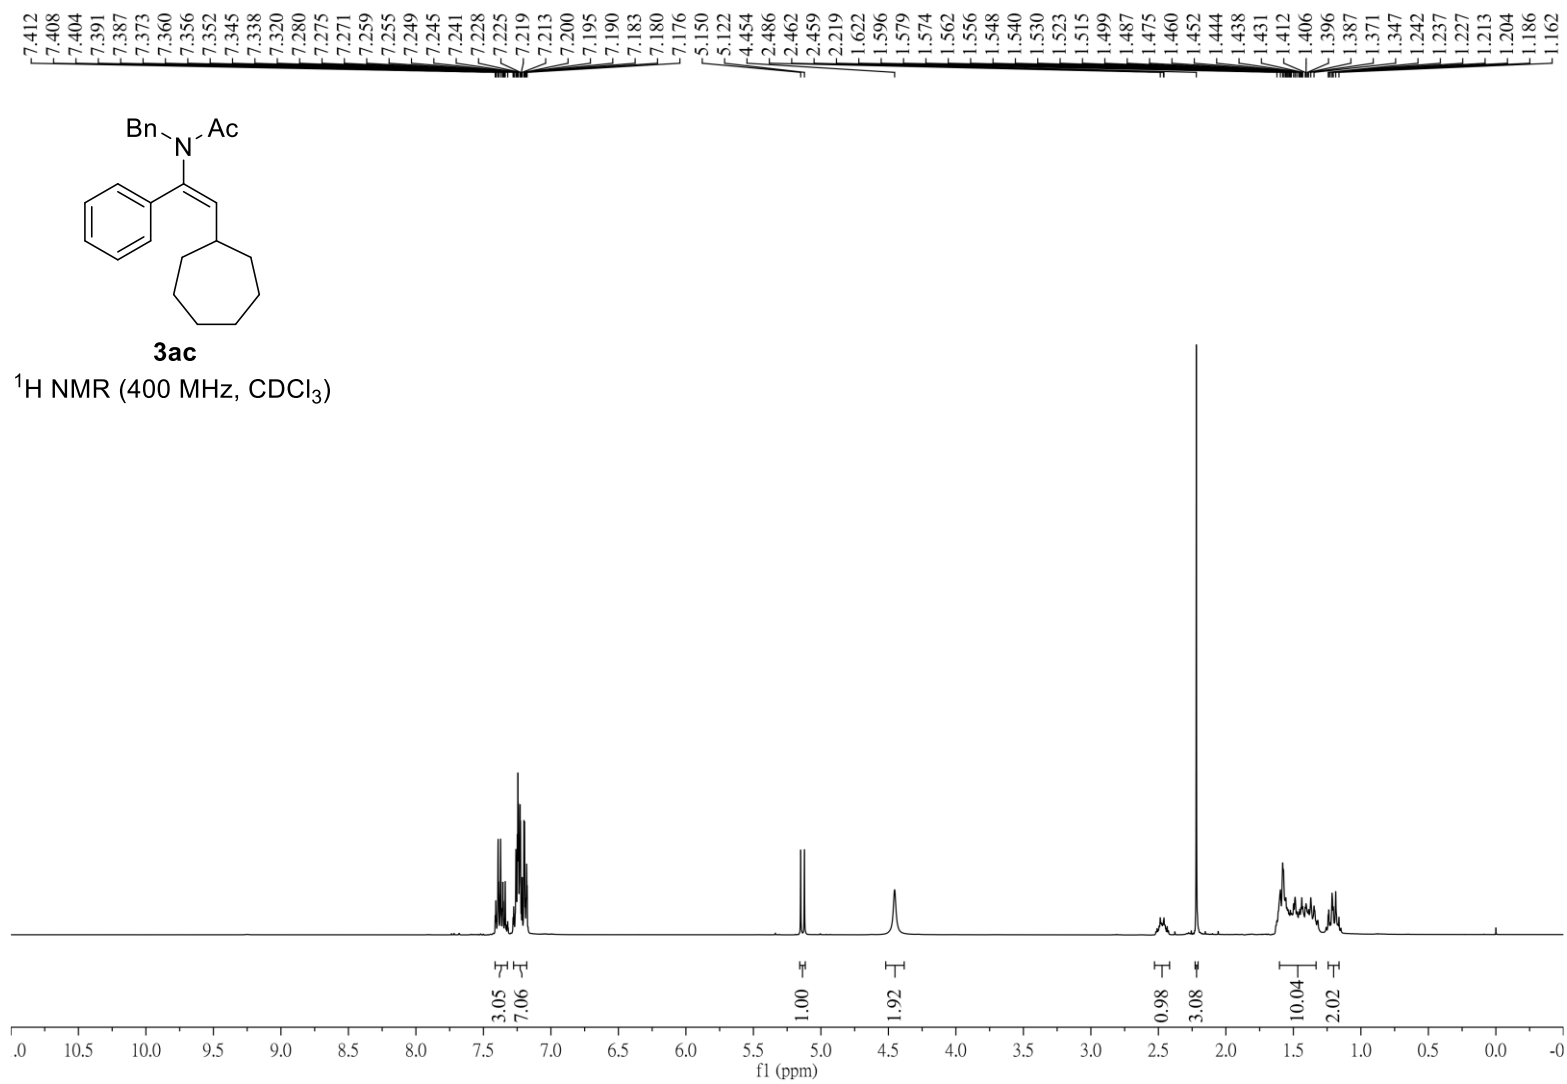

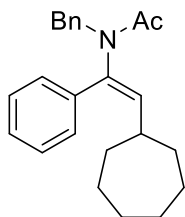

**3ac**

$^{13}\text{C}$  NMR (100 MHz,  $\text{CDCl}_3$ )

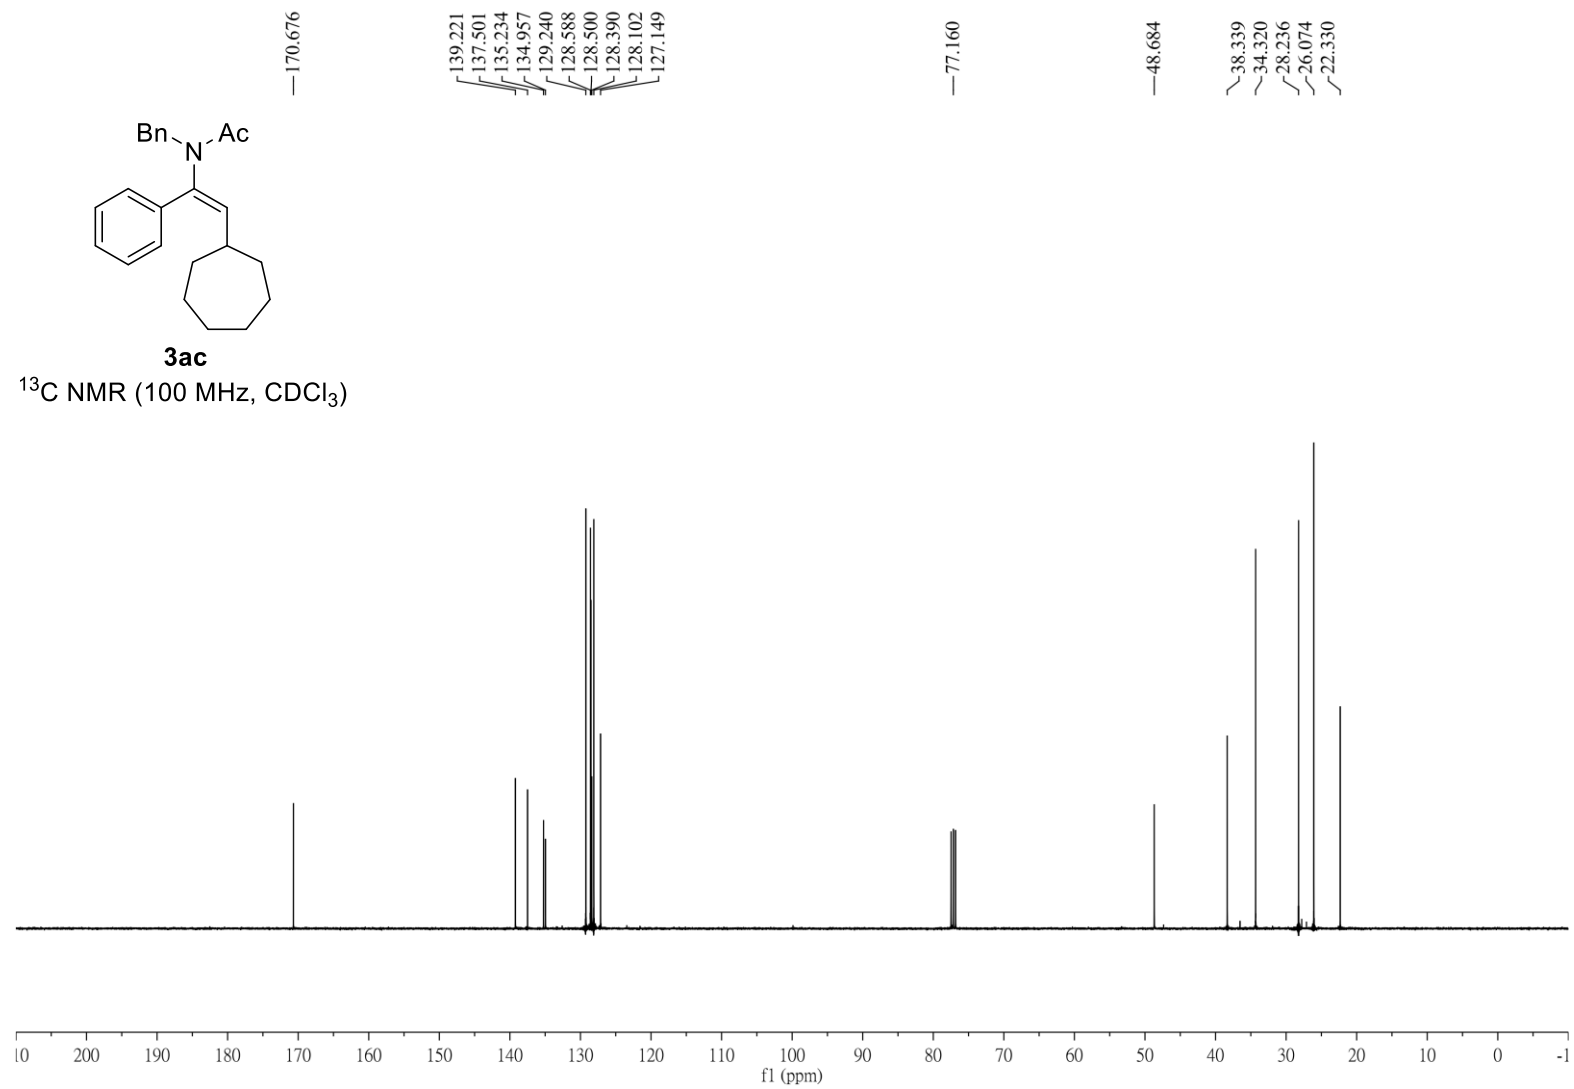



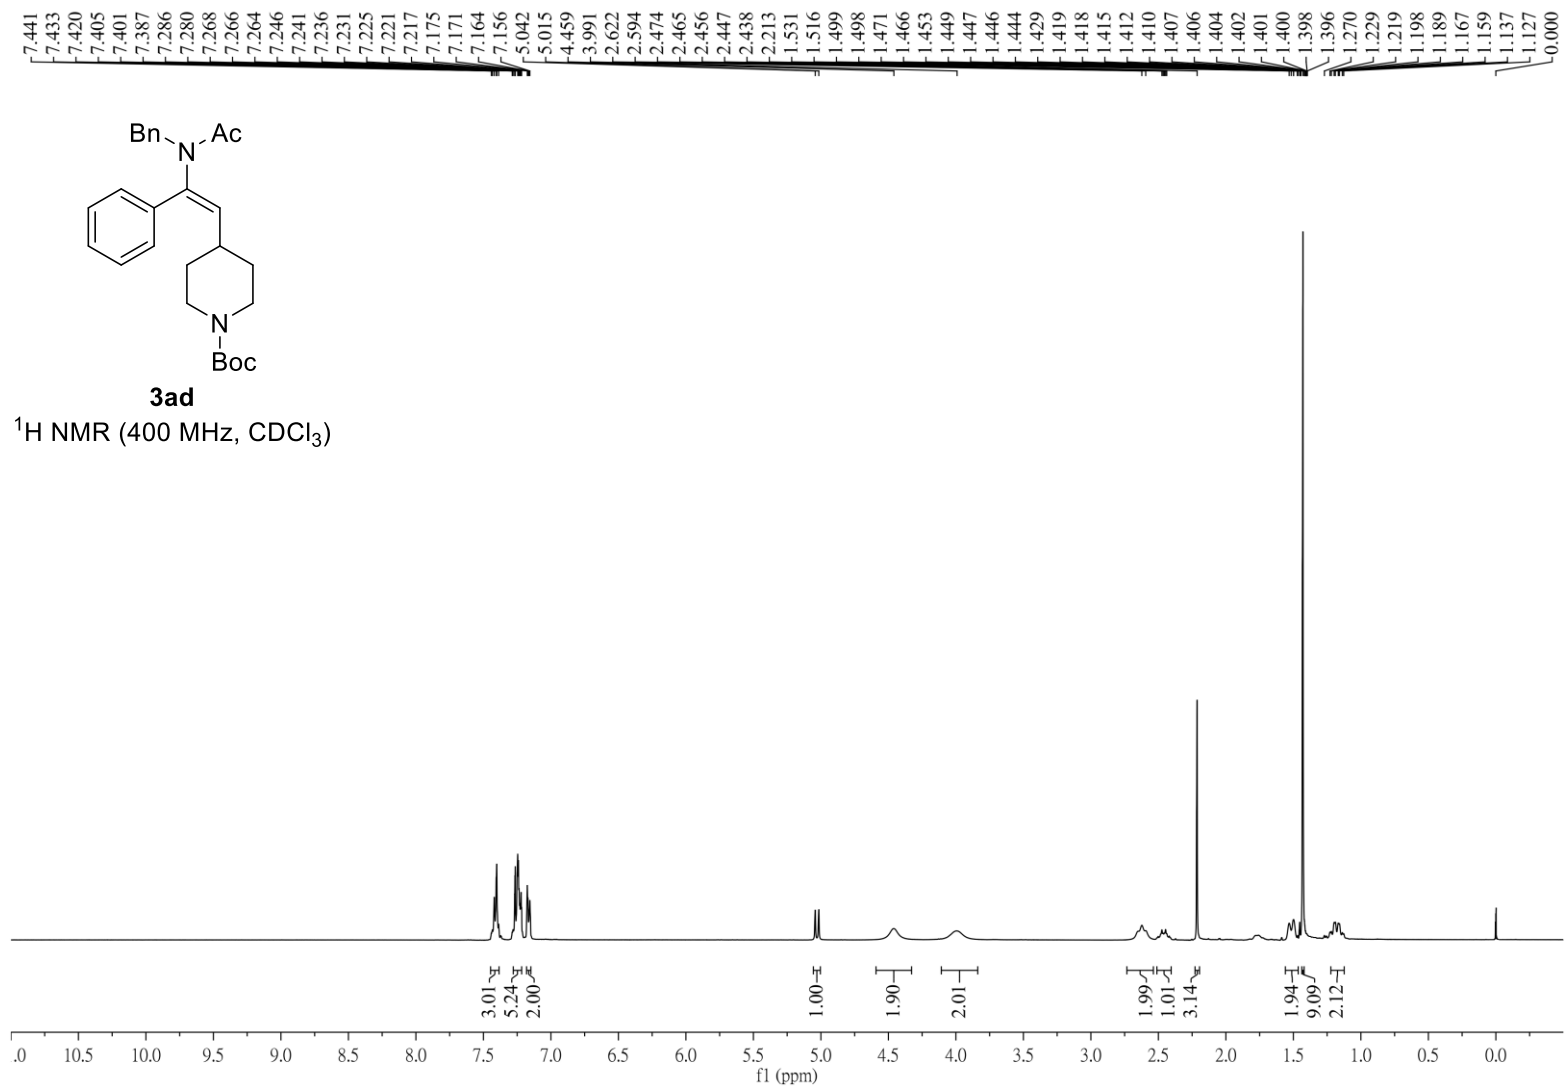

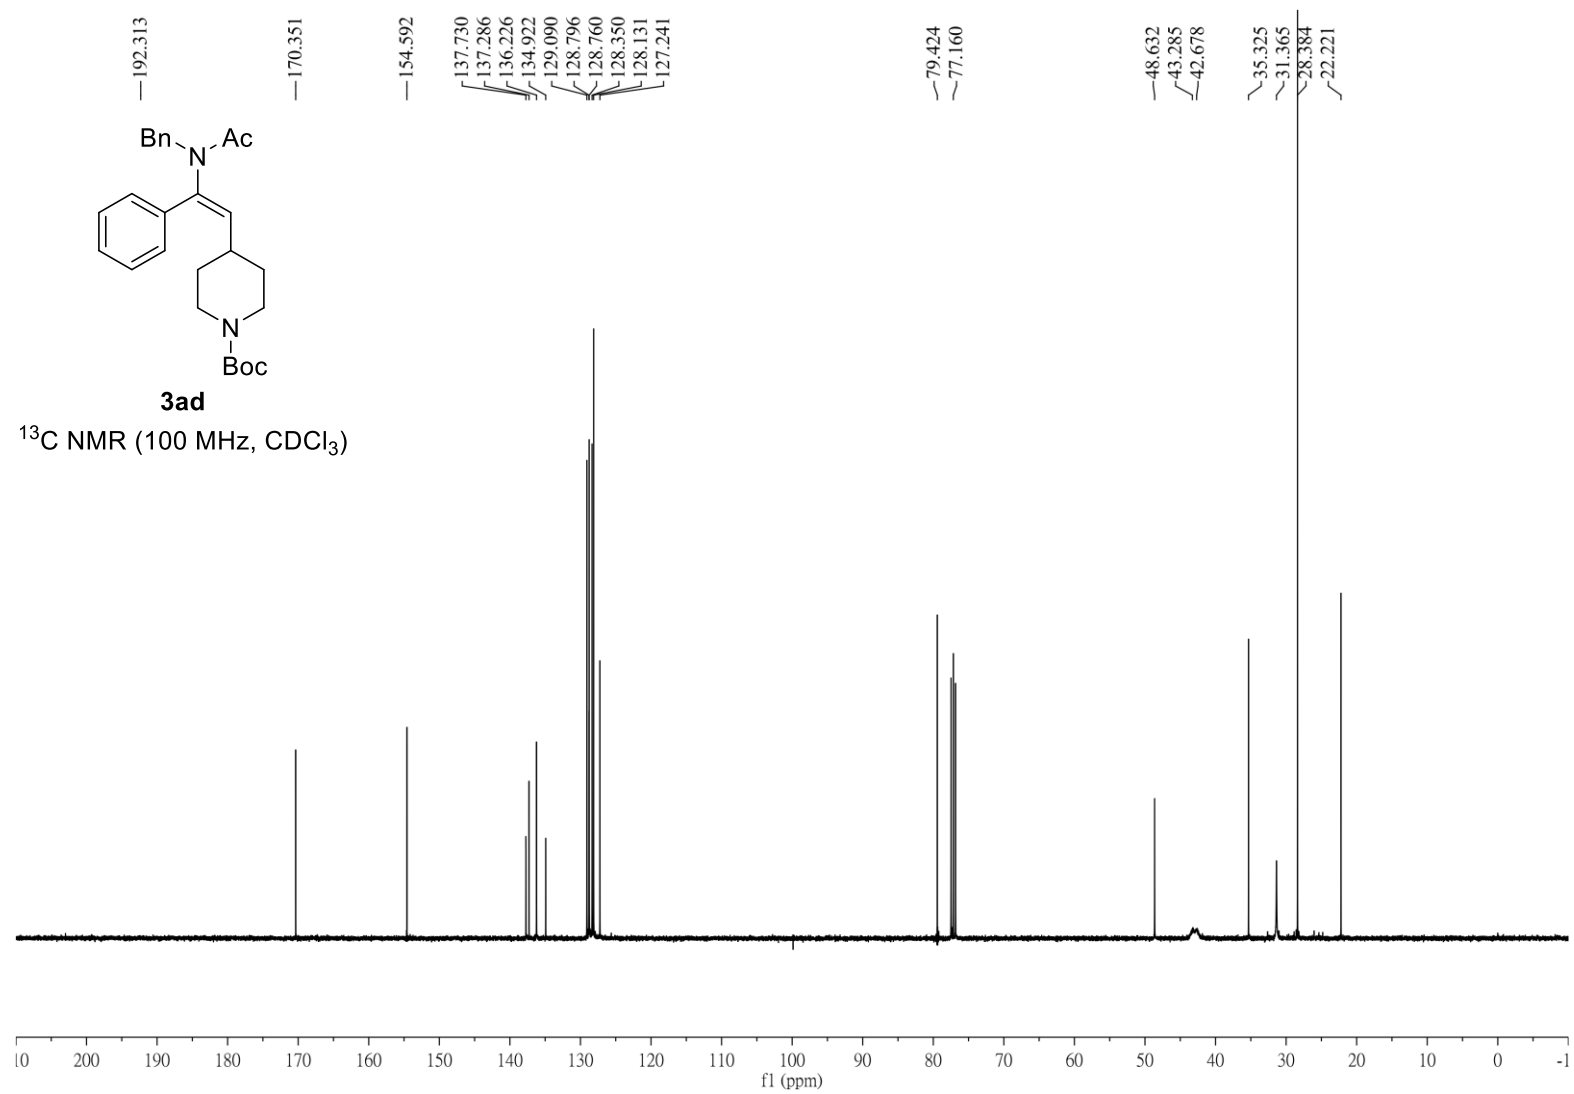

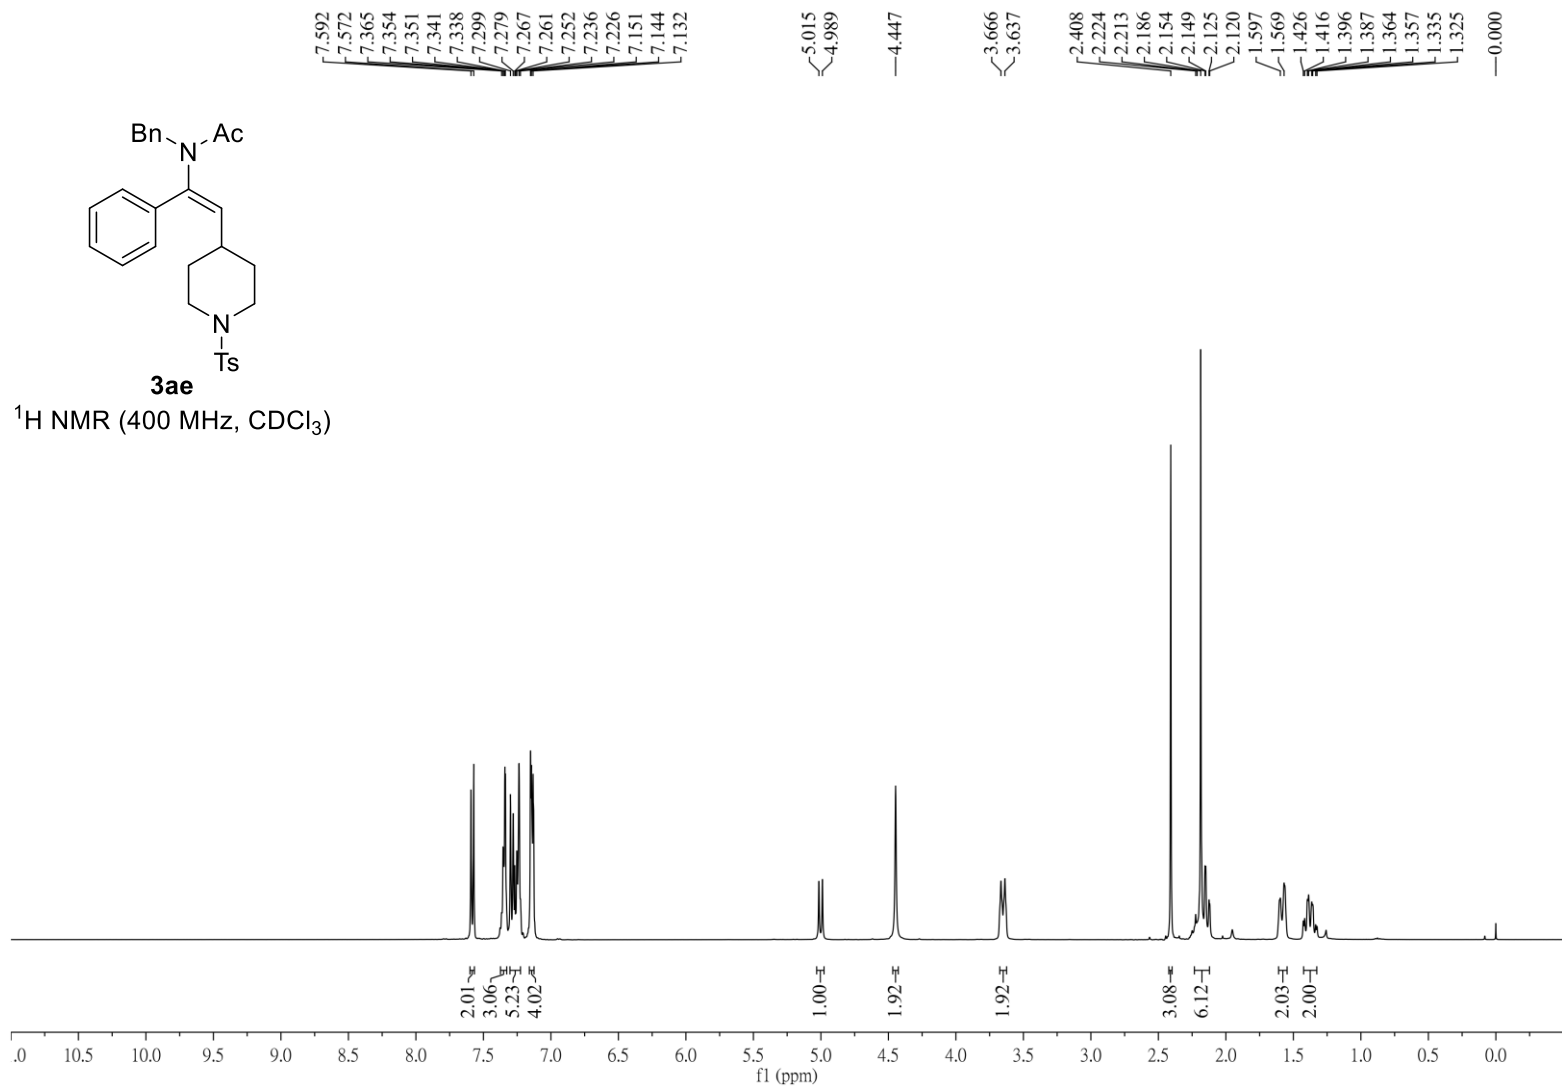

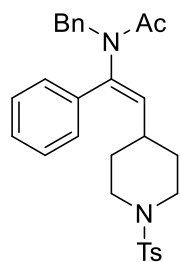

$^{13}\text{C}$  NMR (100 MHz,  $\text{CDCl}_3$ )

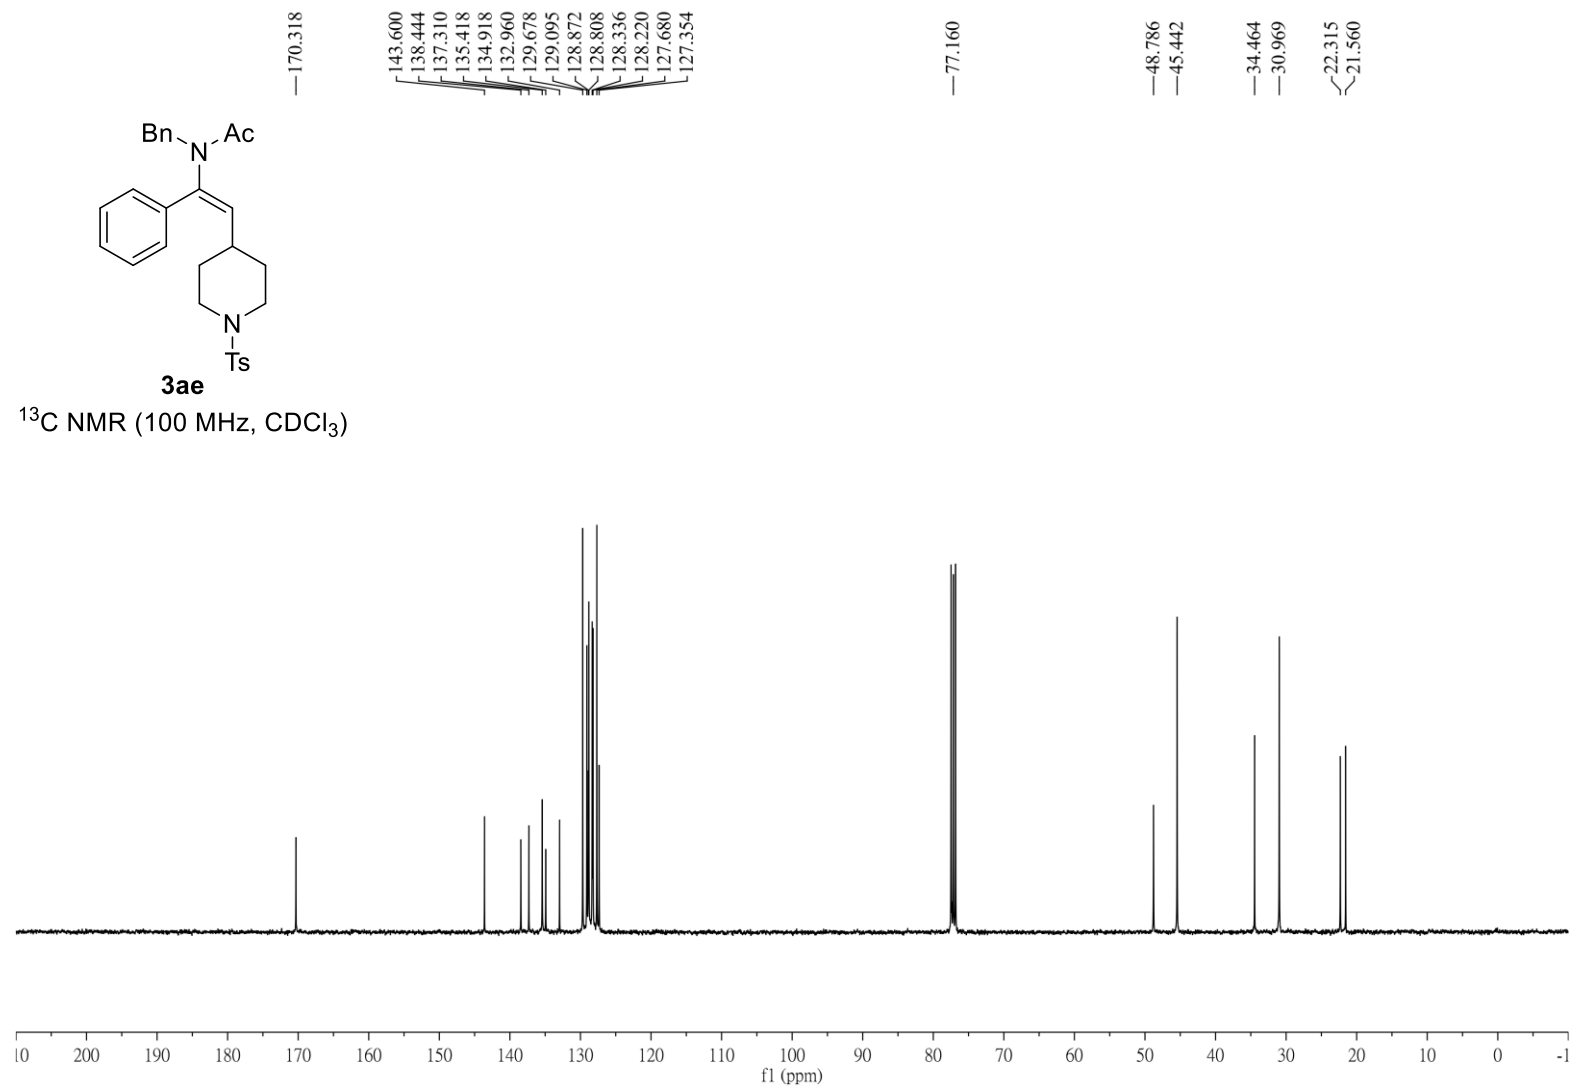

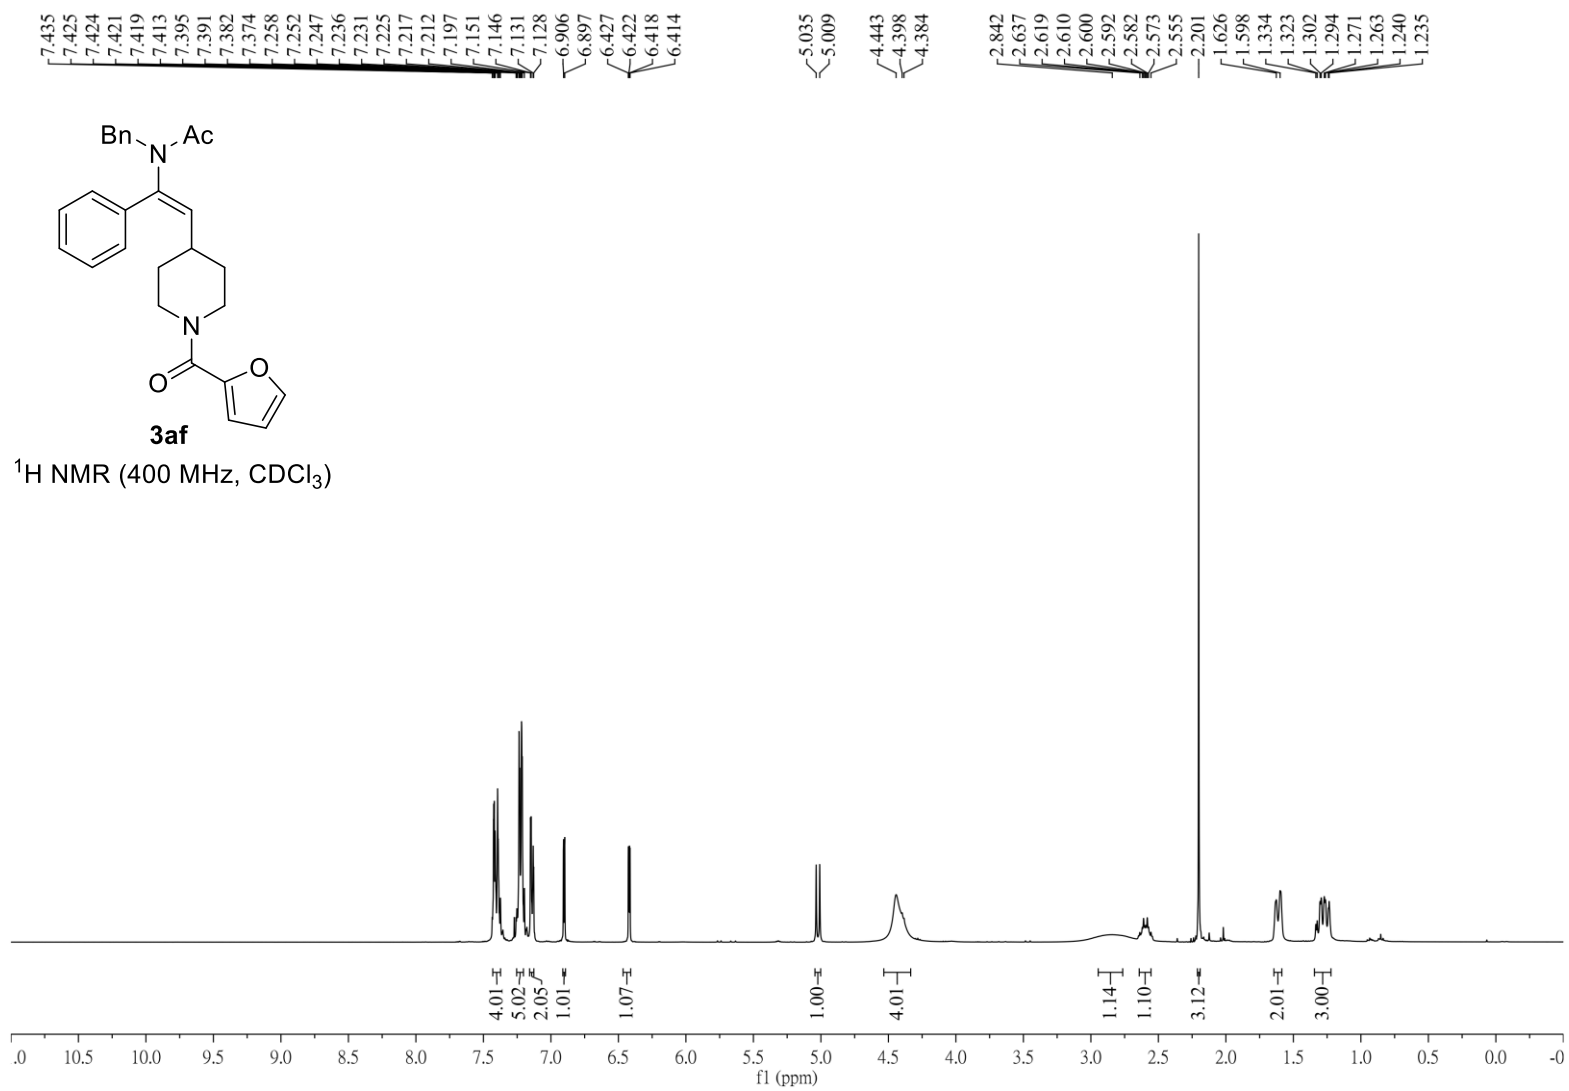

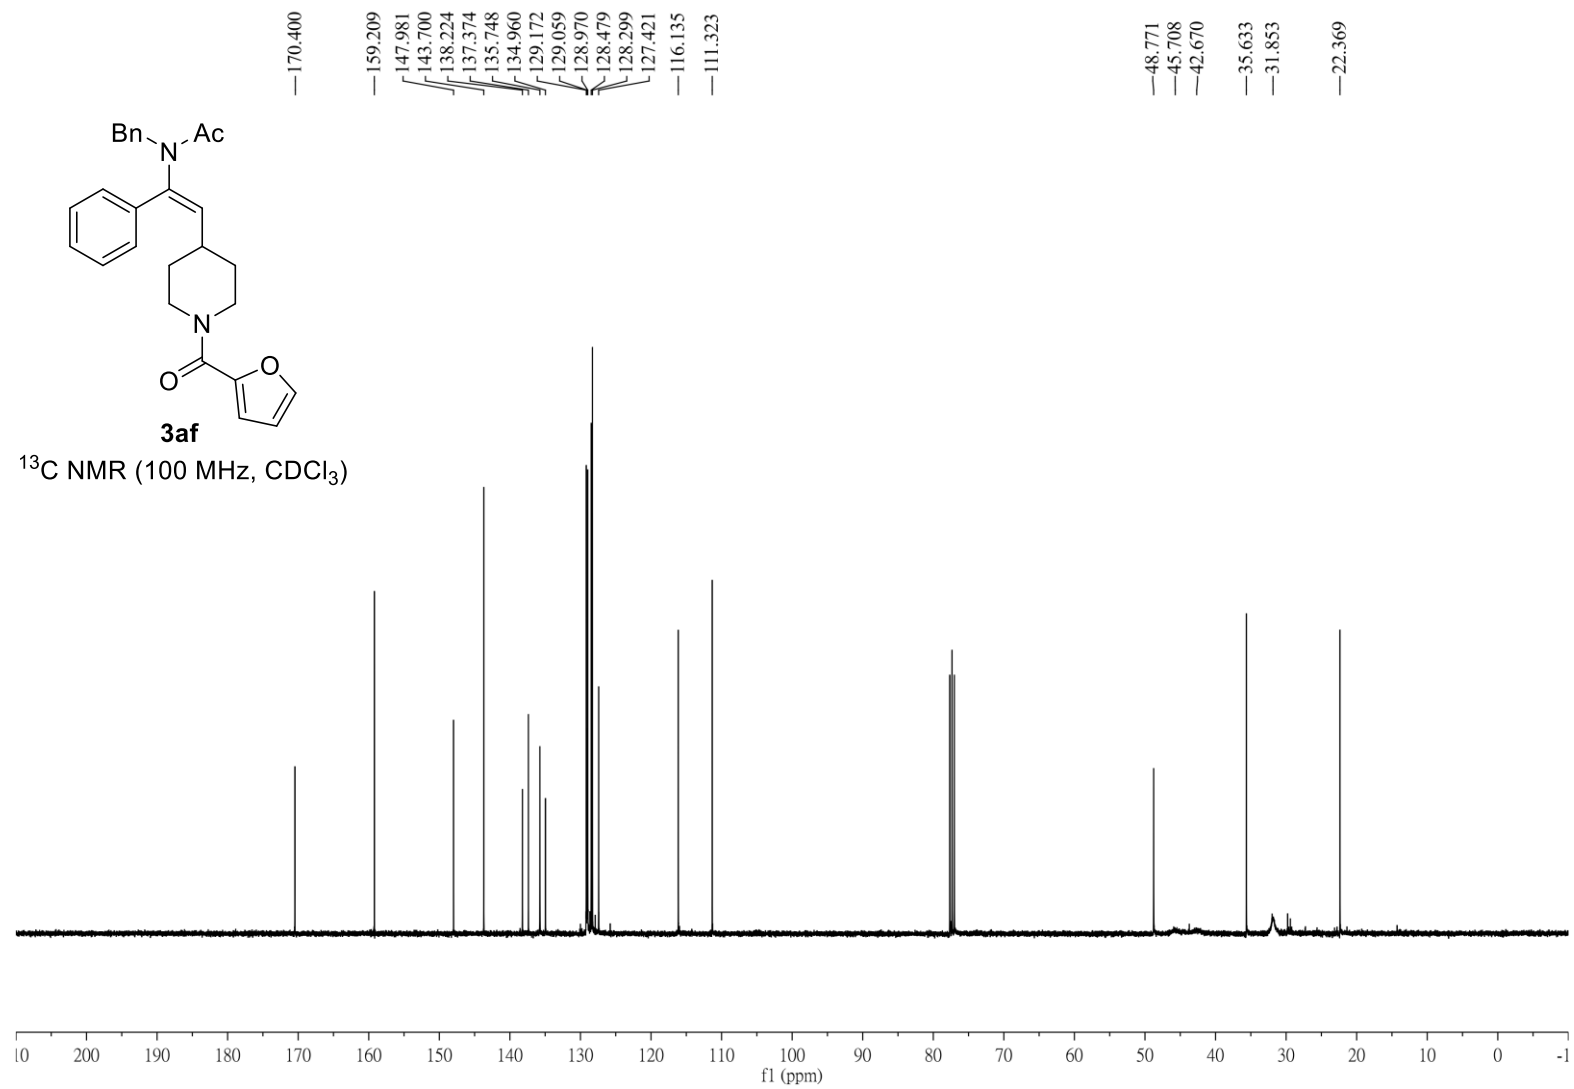

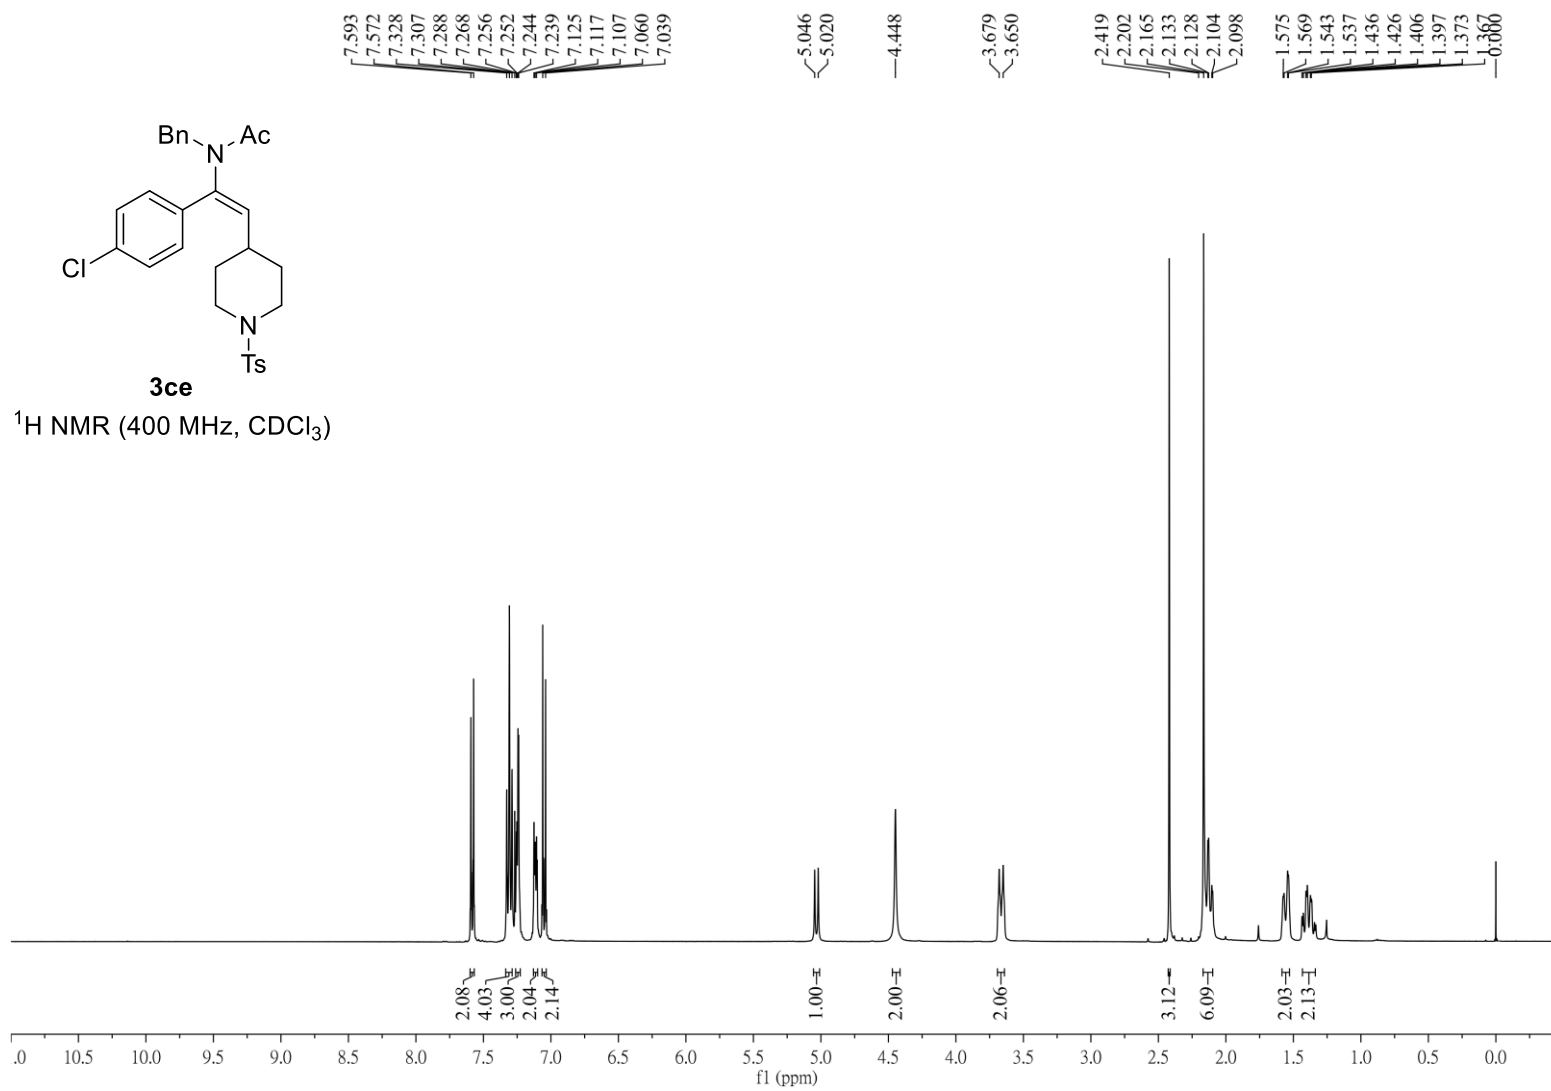

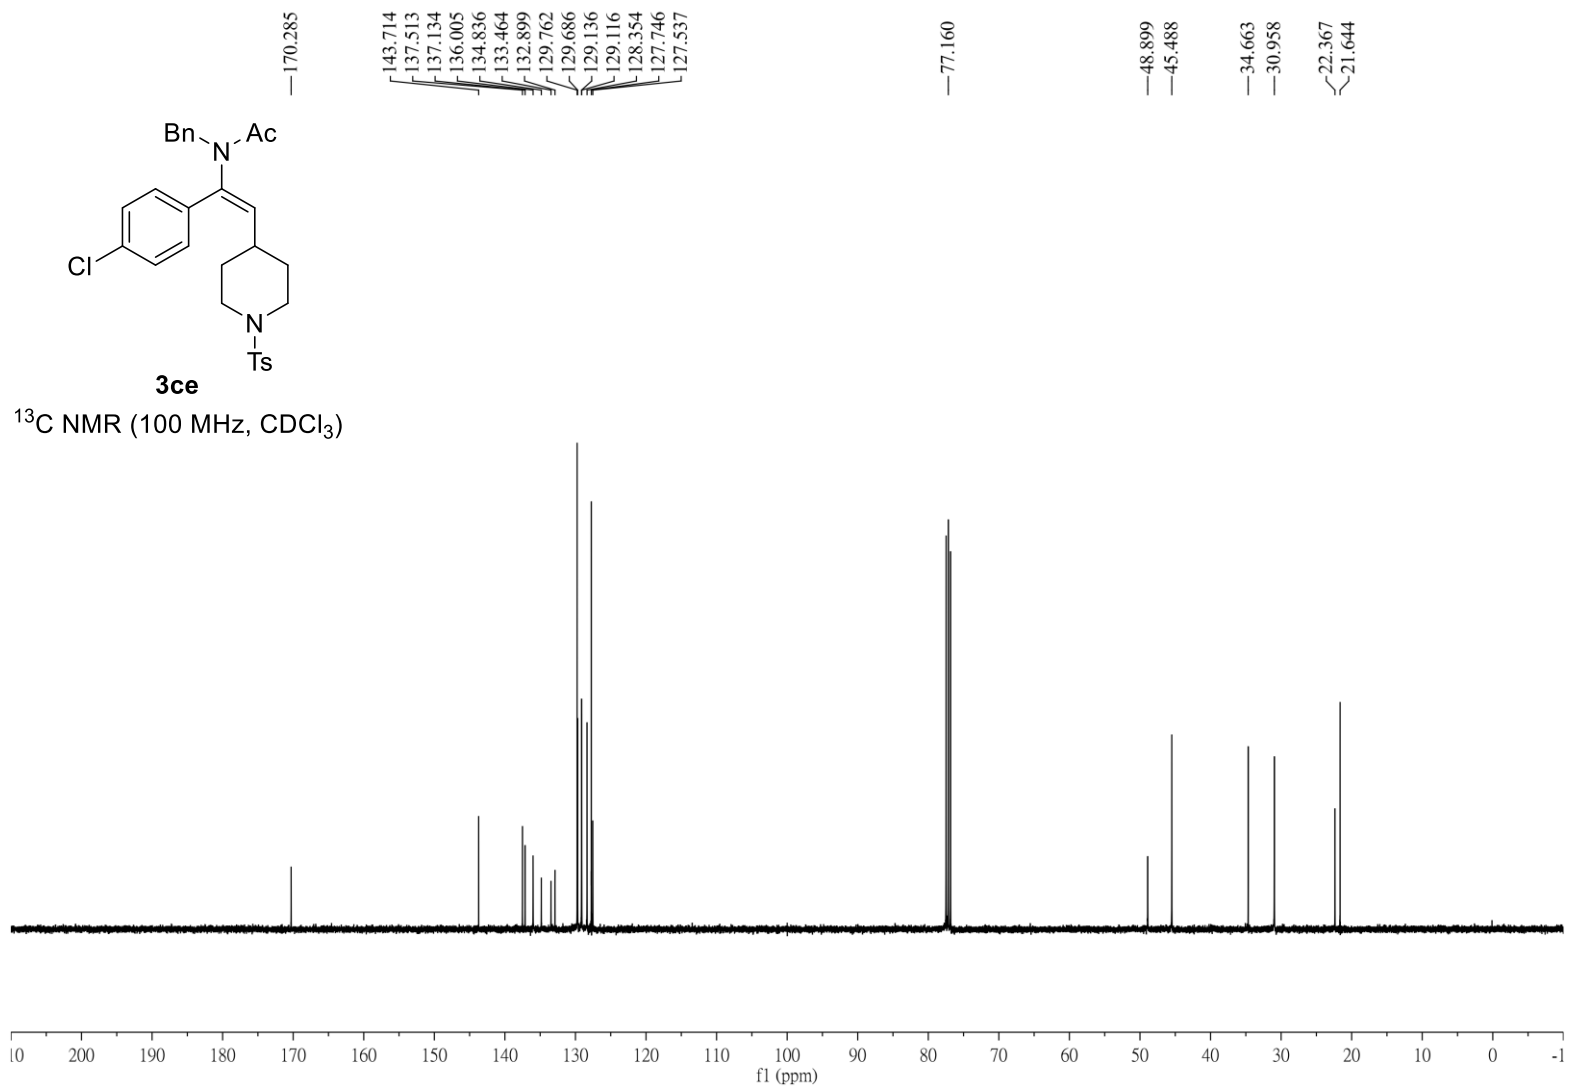



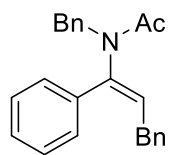

**3ag**

$^1\text{H}$  NMR (400 MHz,  $\text{CDCl}_3$ )

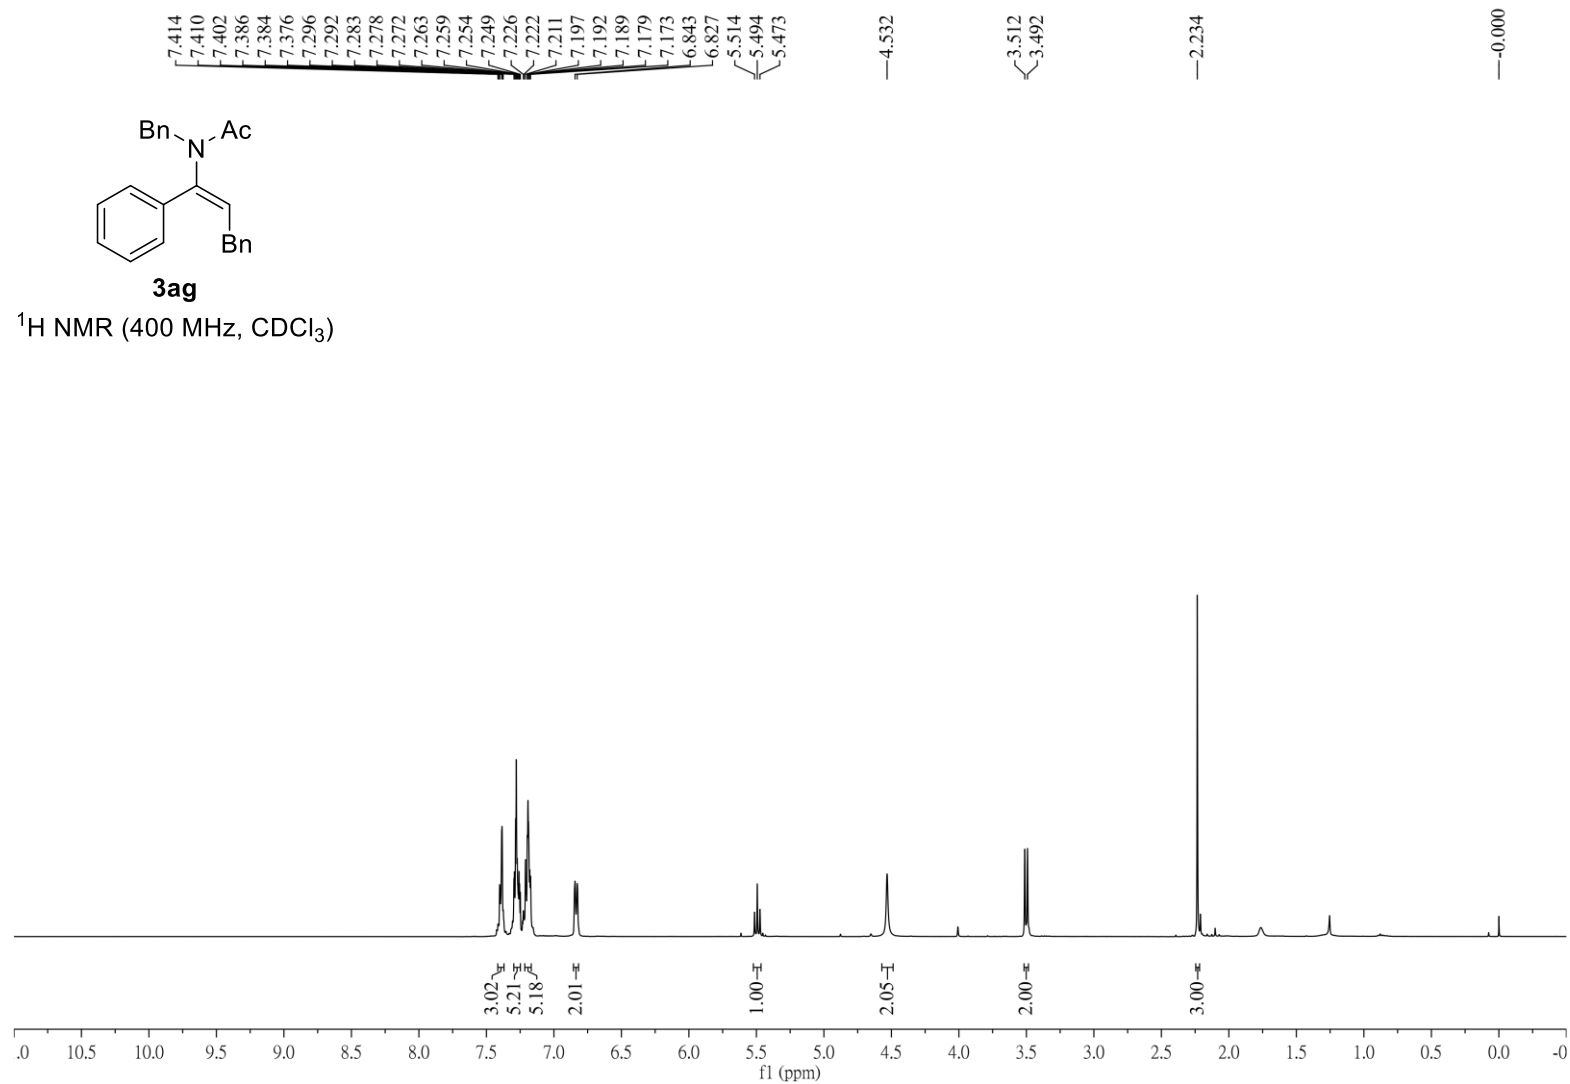

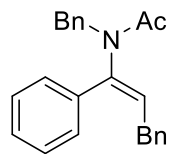

**3ag**

$^{13}\text{C}$  NMR (100 MHz,  $\text{CDCl}_3$ )

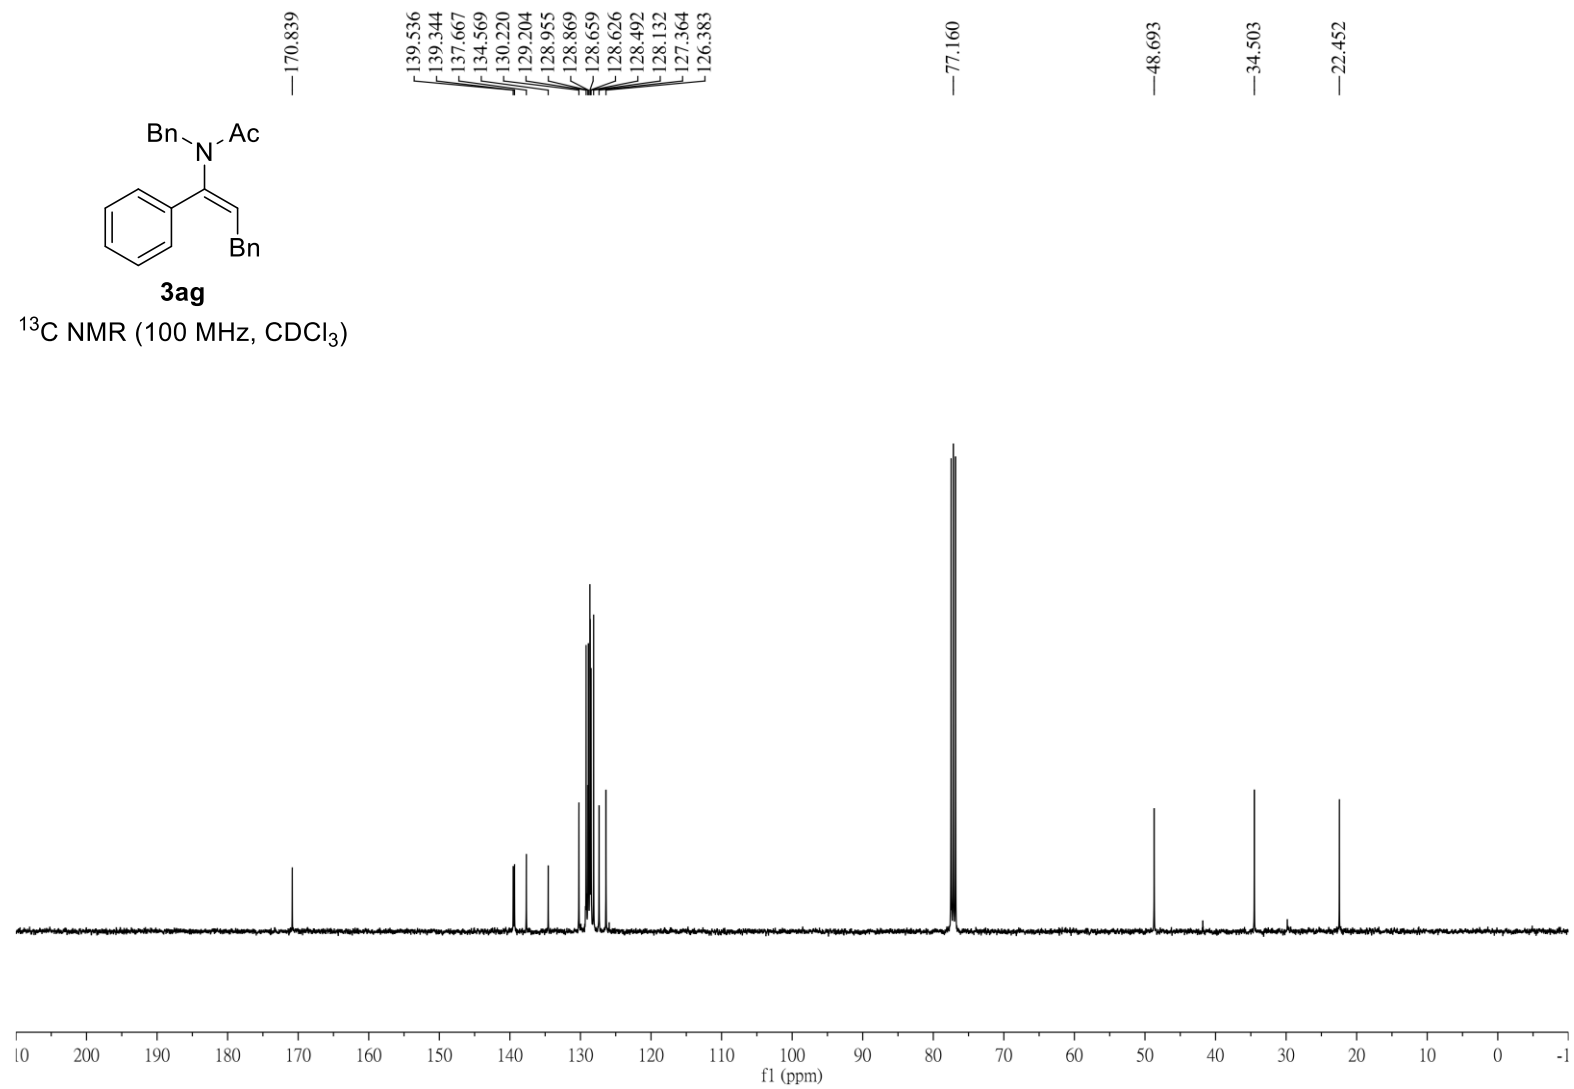

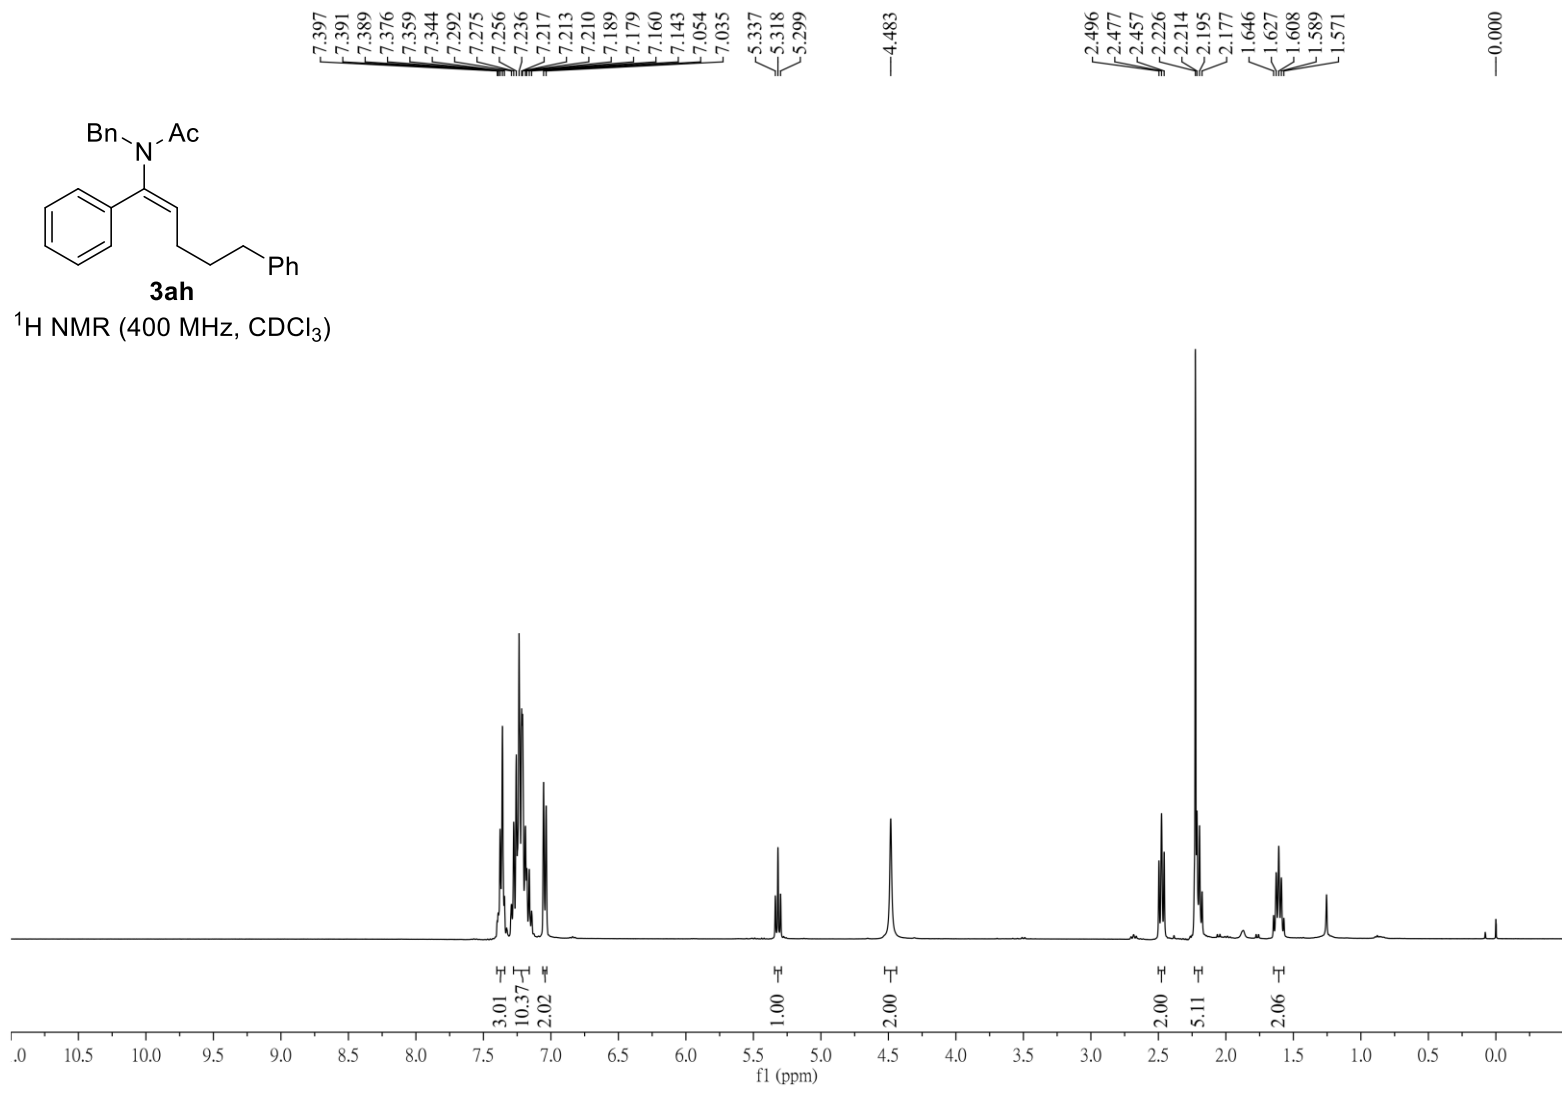

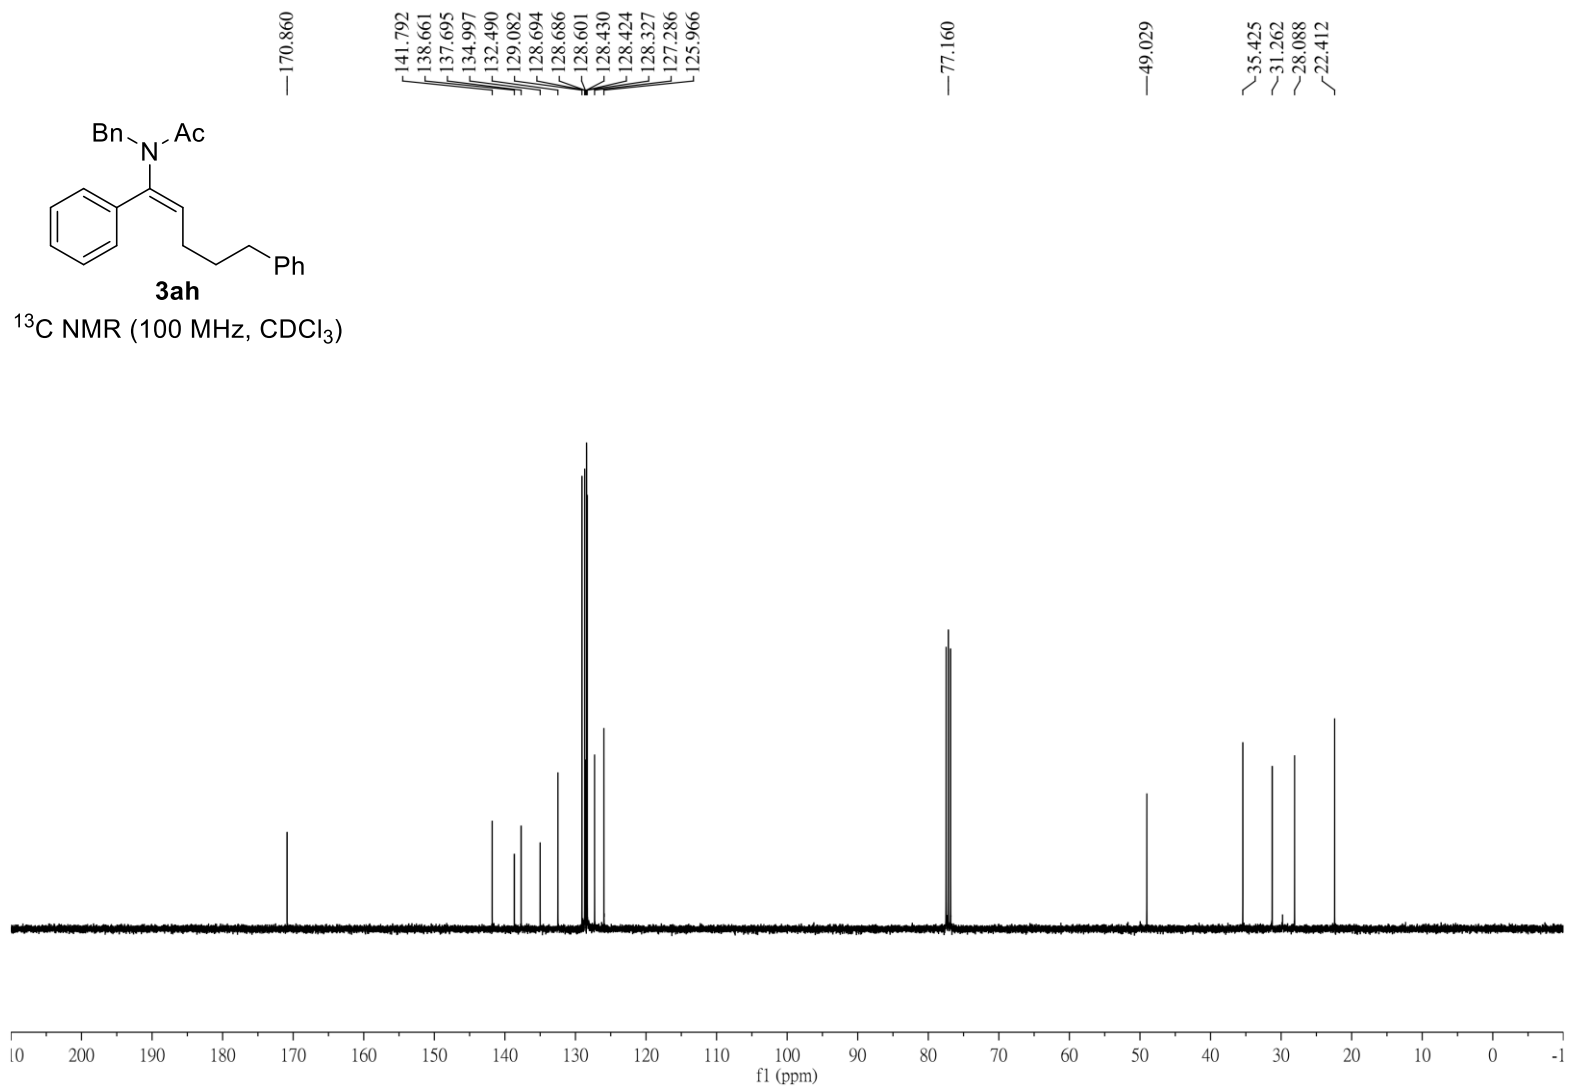

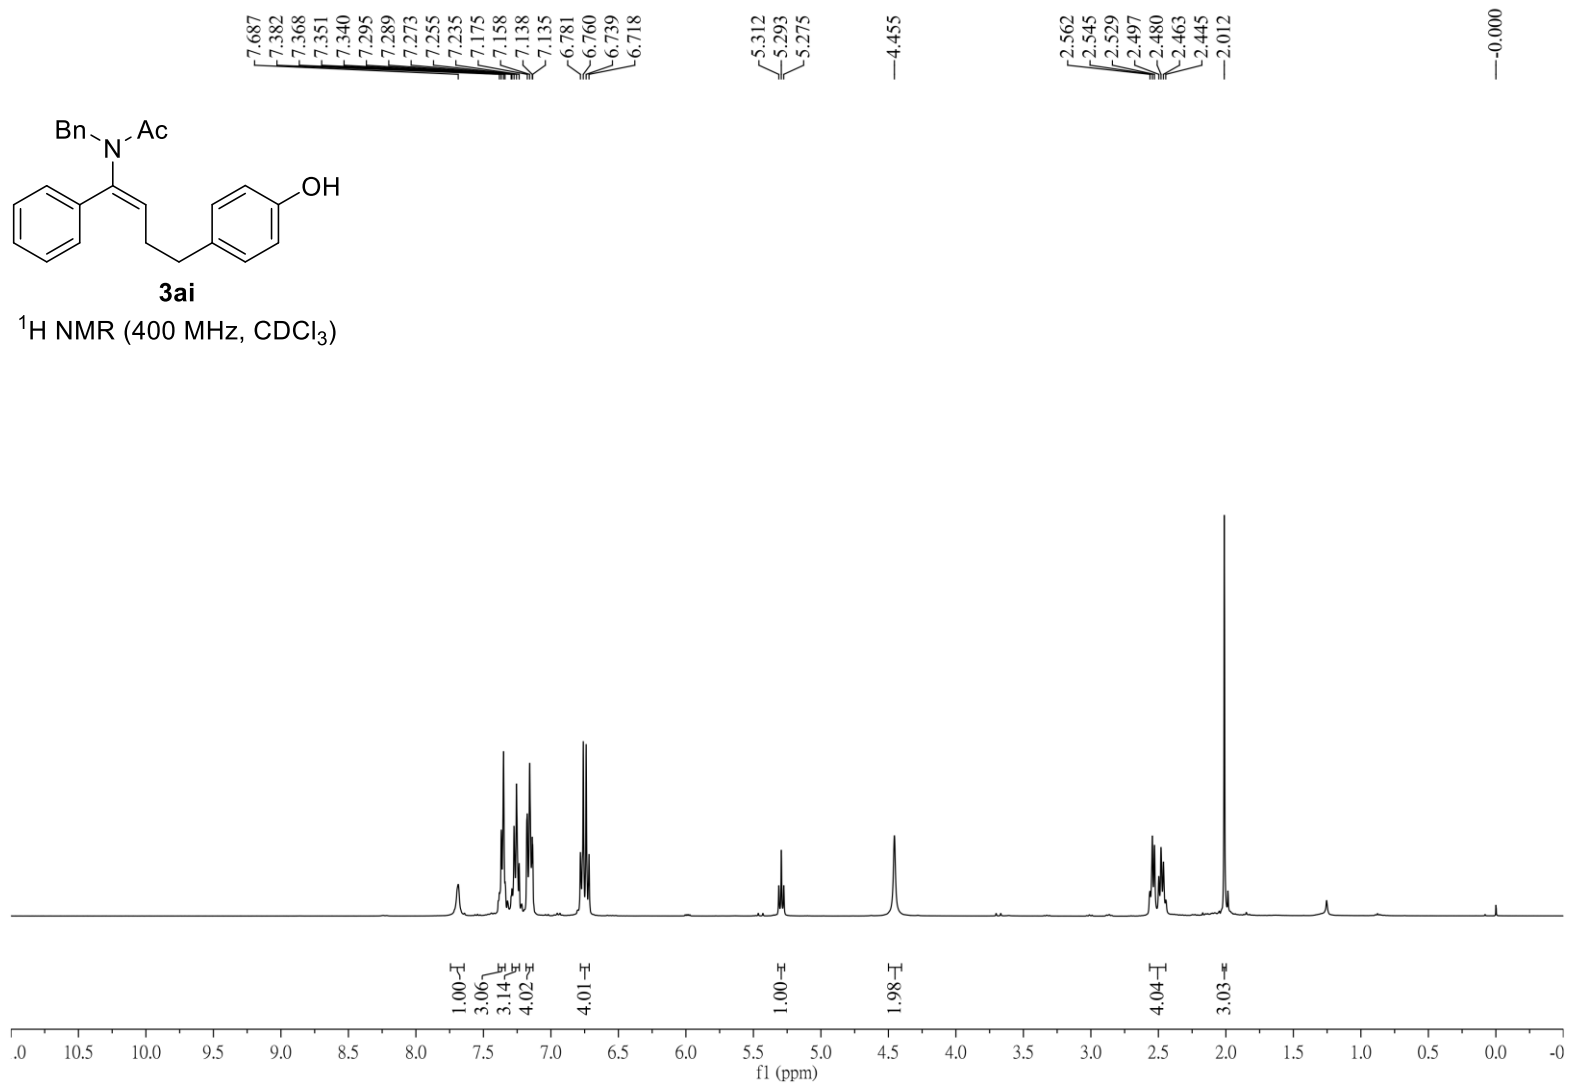

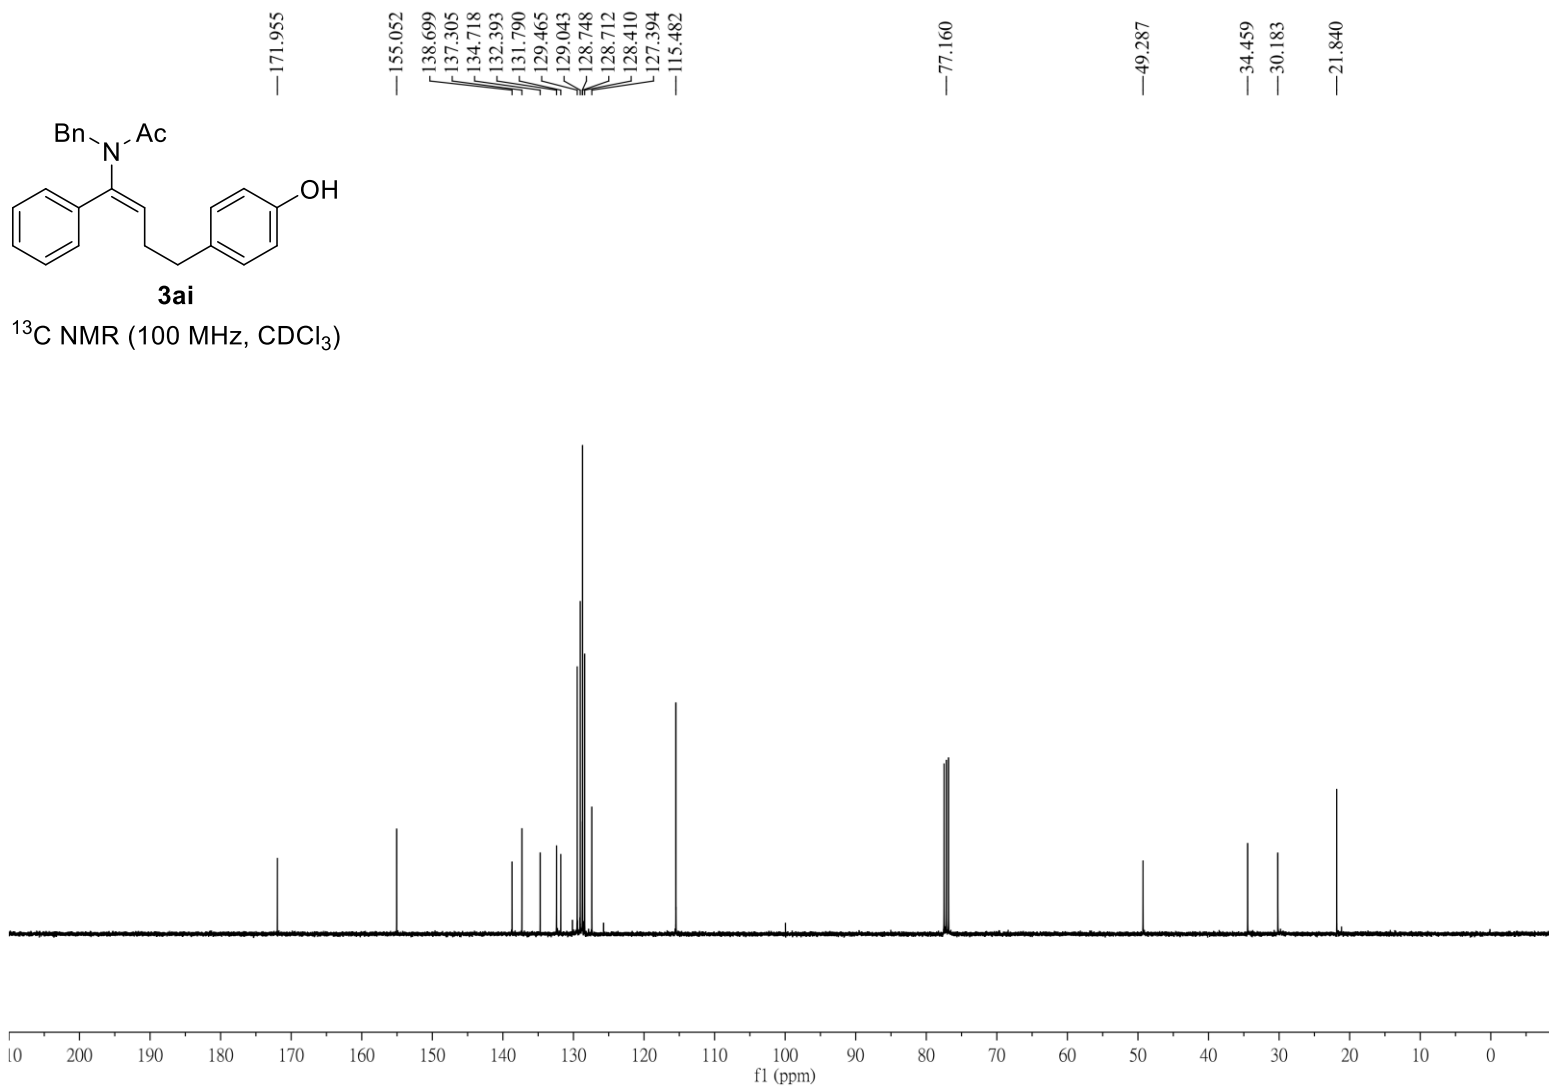

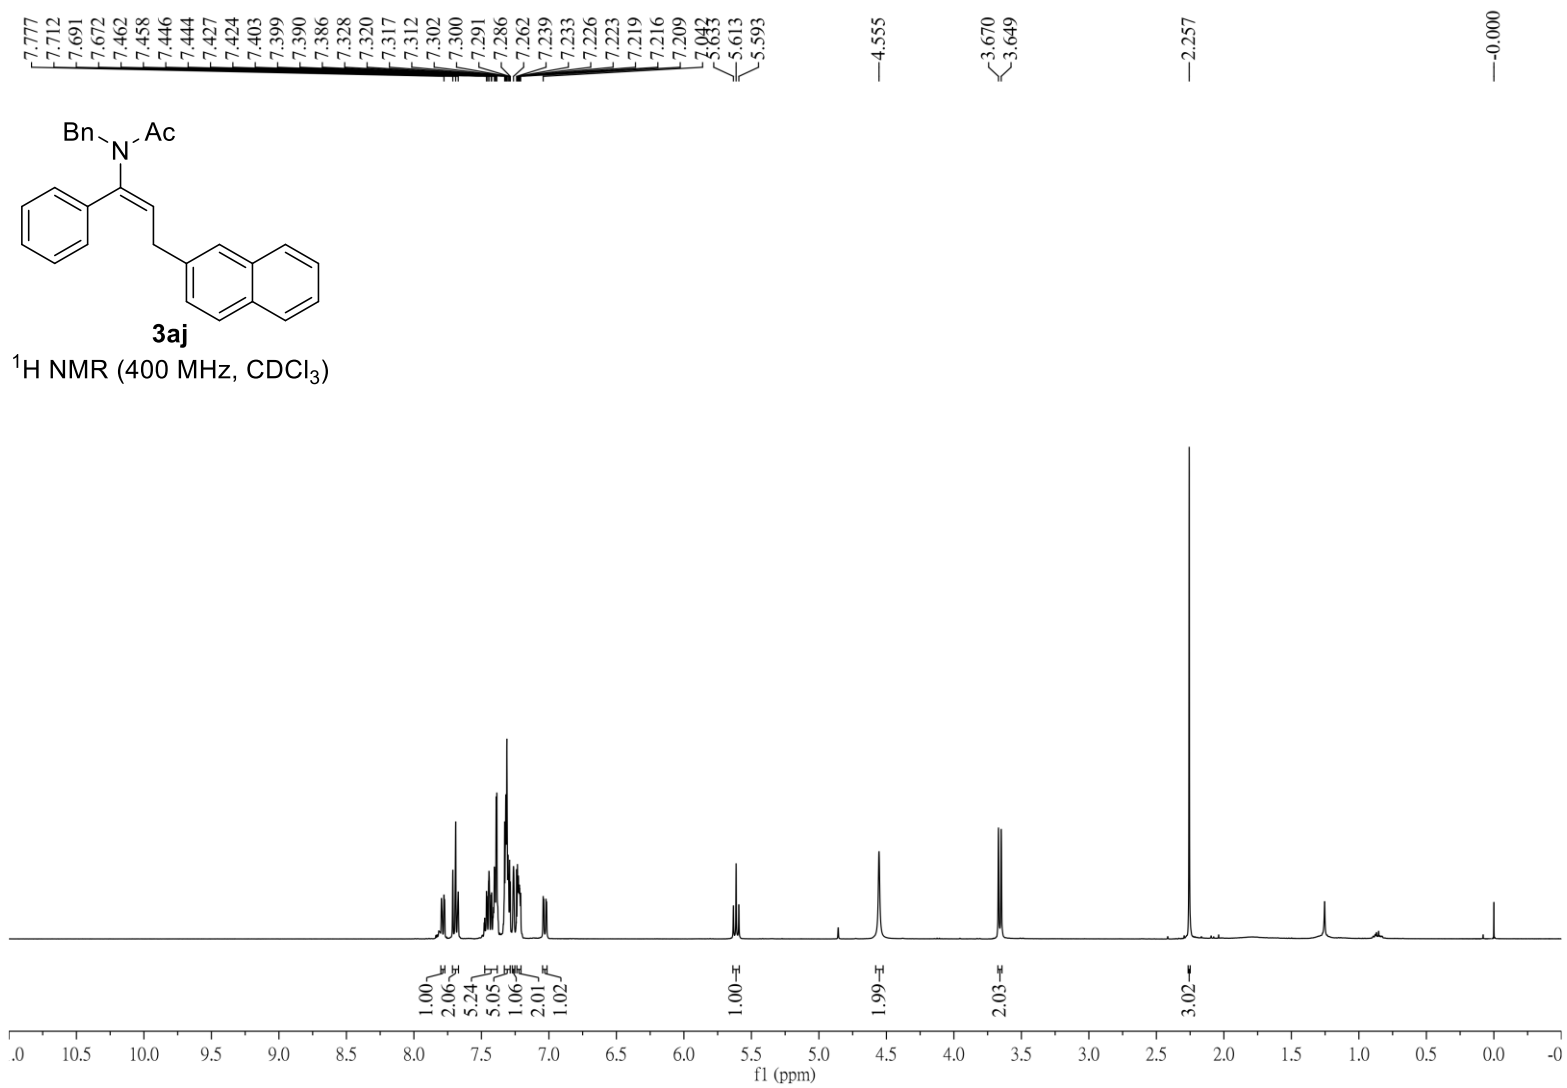

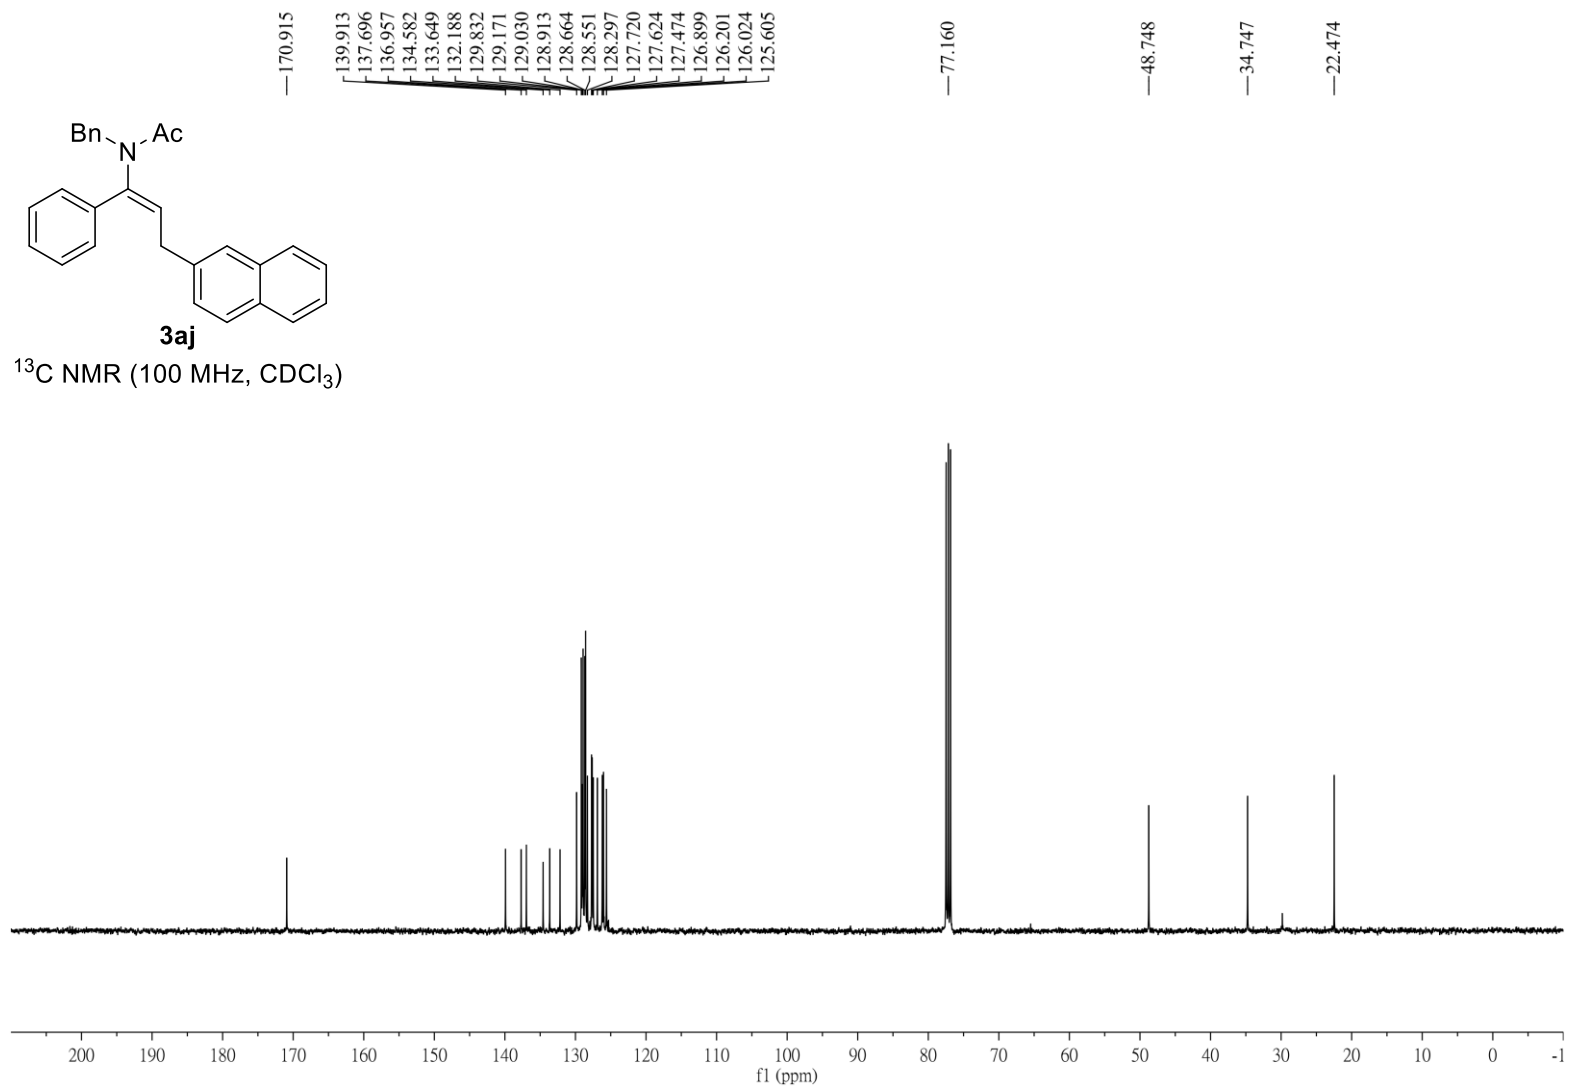



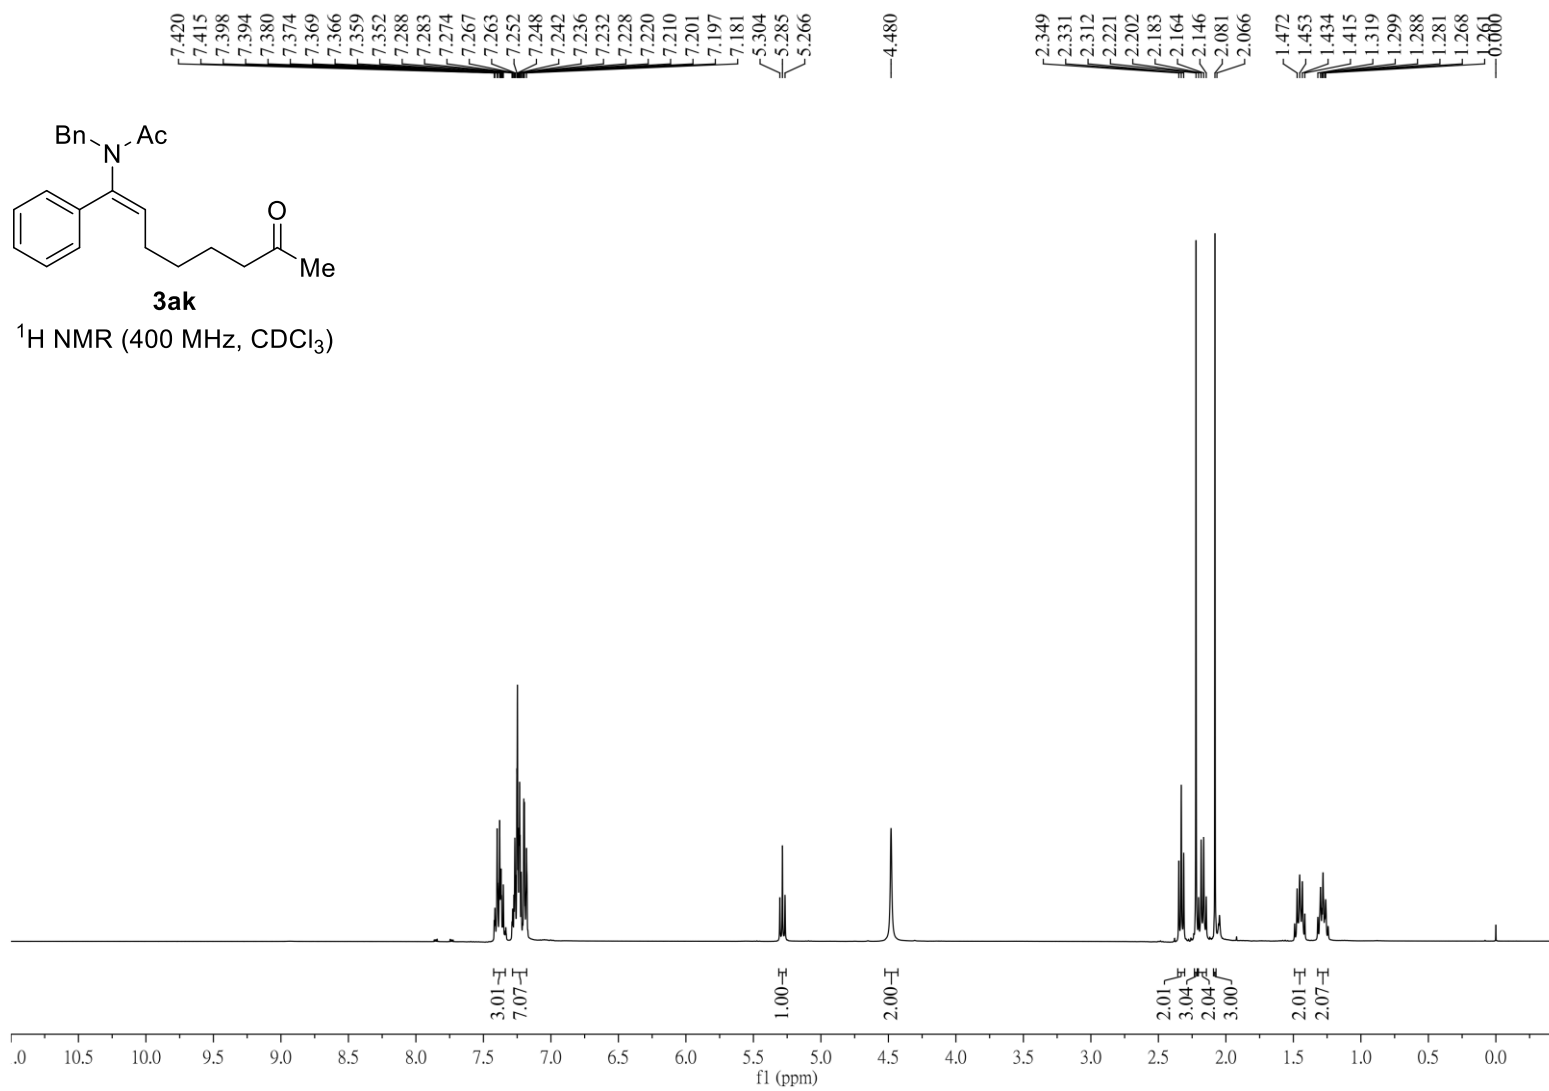

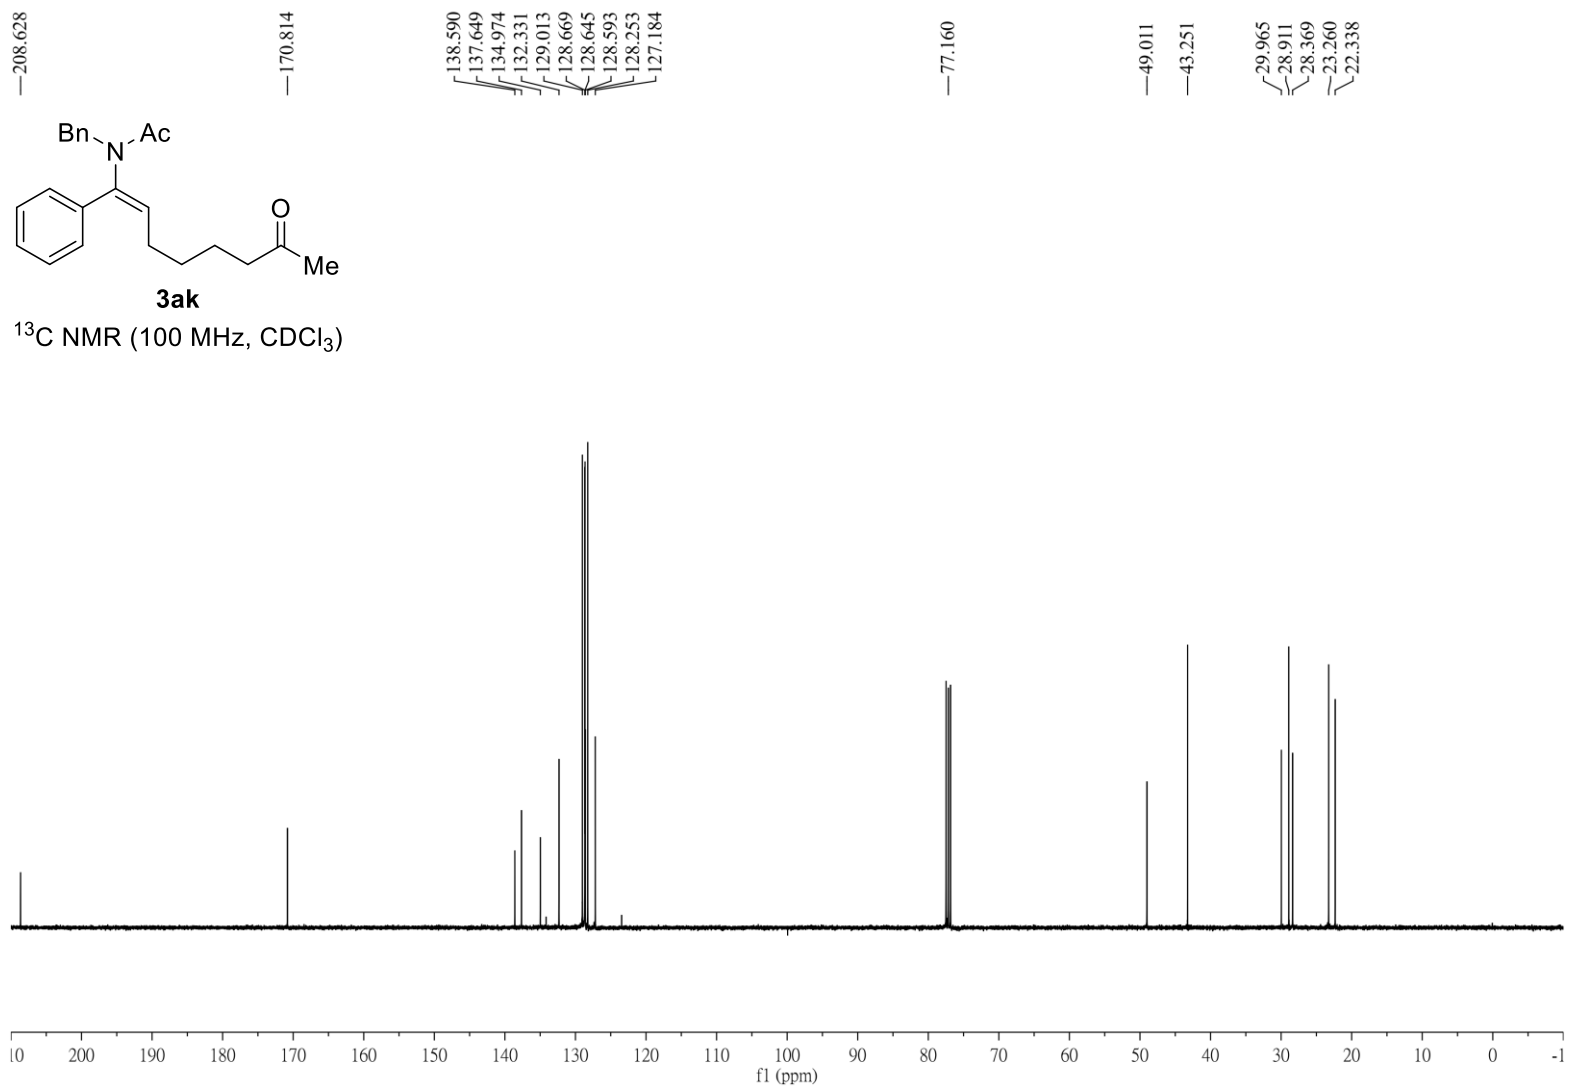

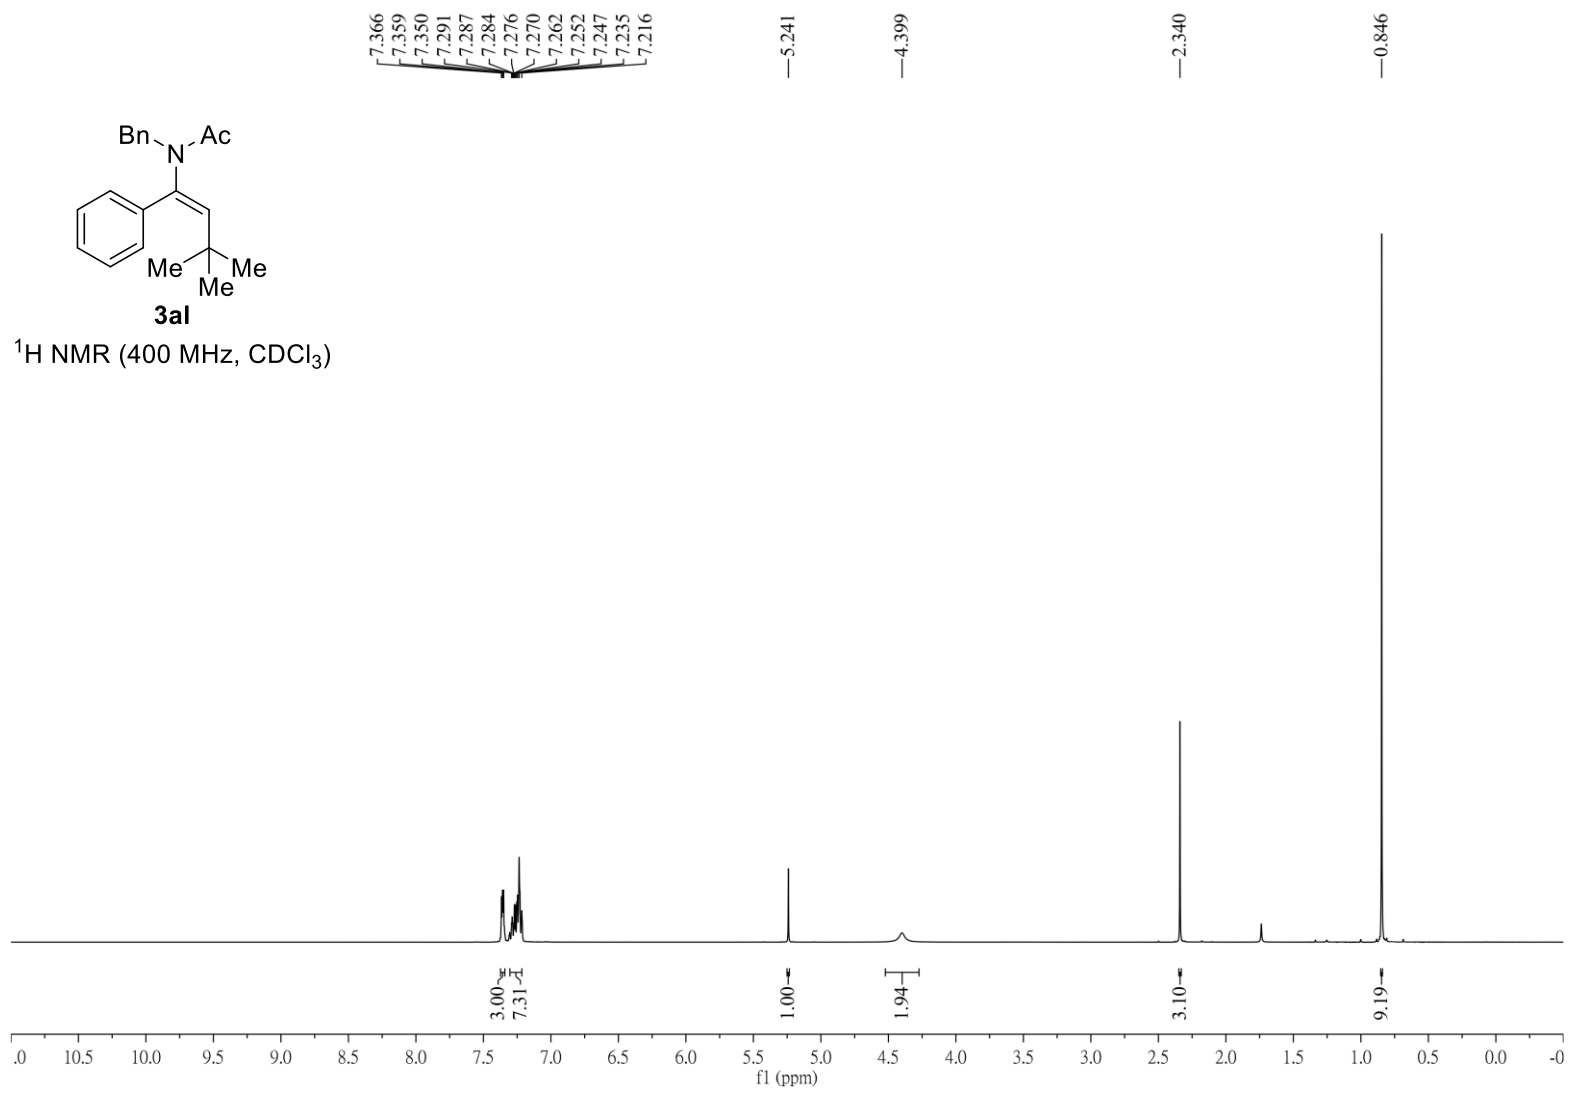

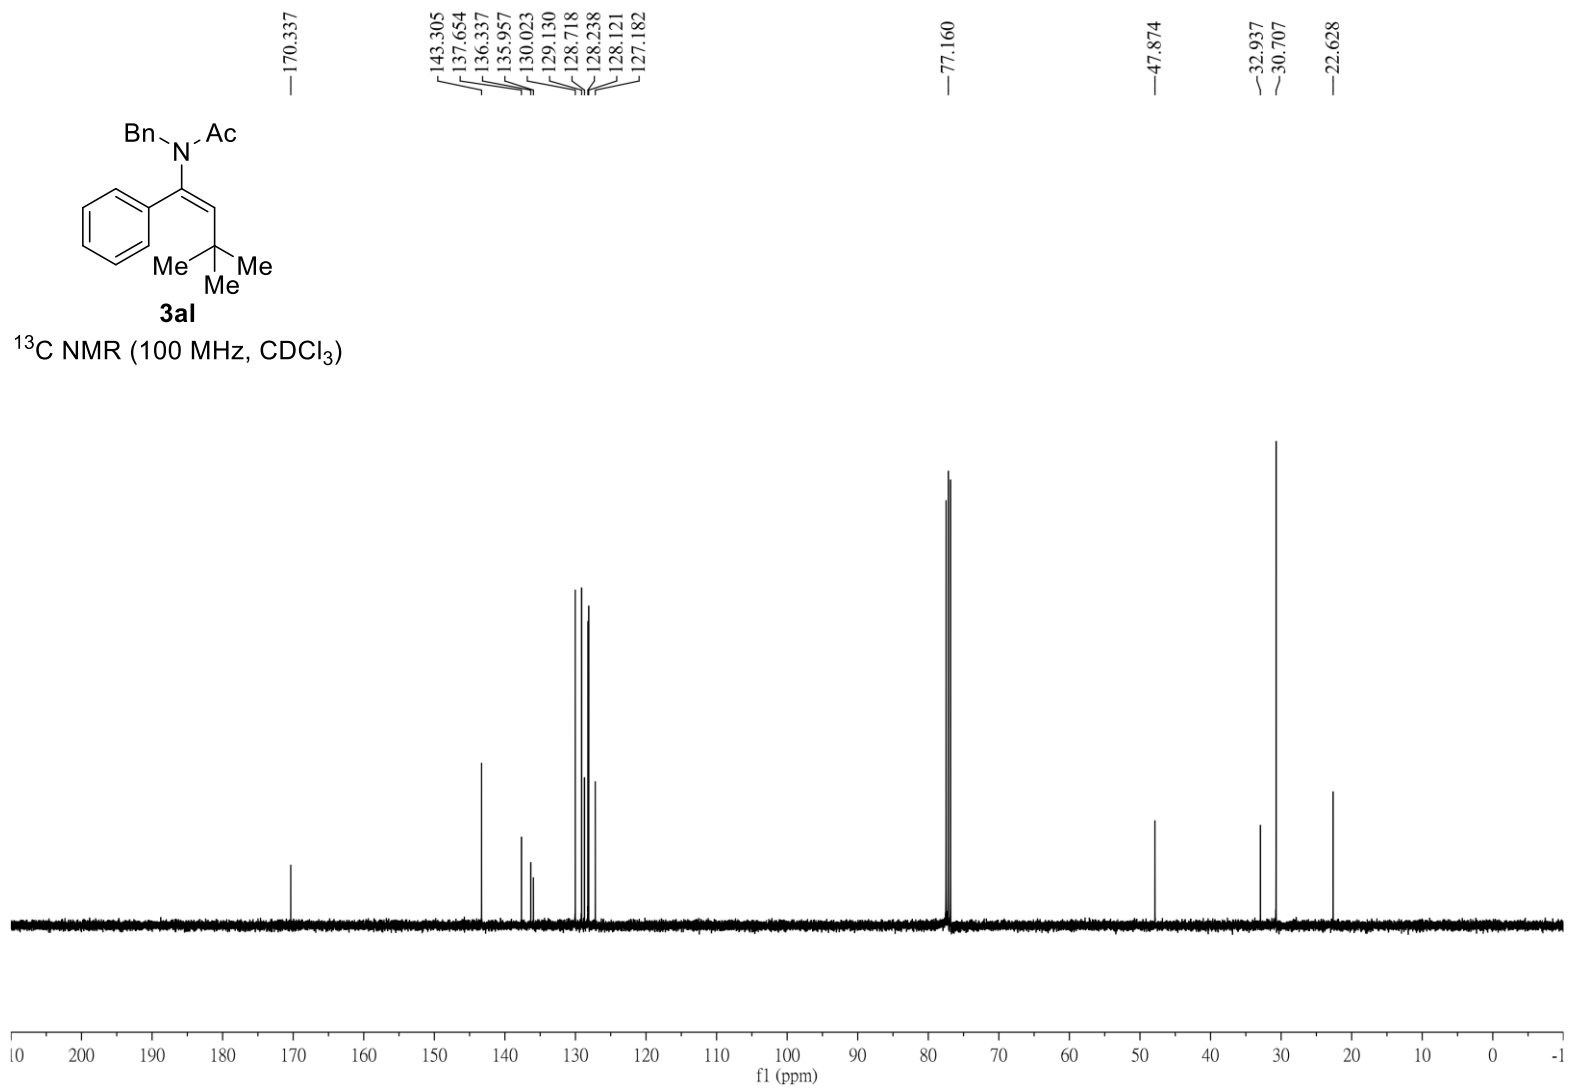

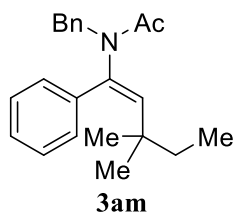

<sup>1</sup>H NMR (400 MHz, CDCl<sub>3</sub>)

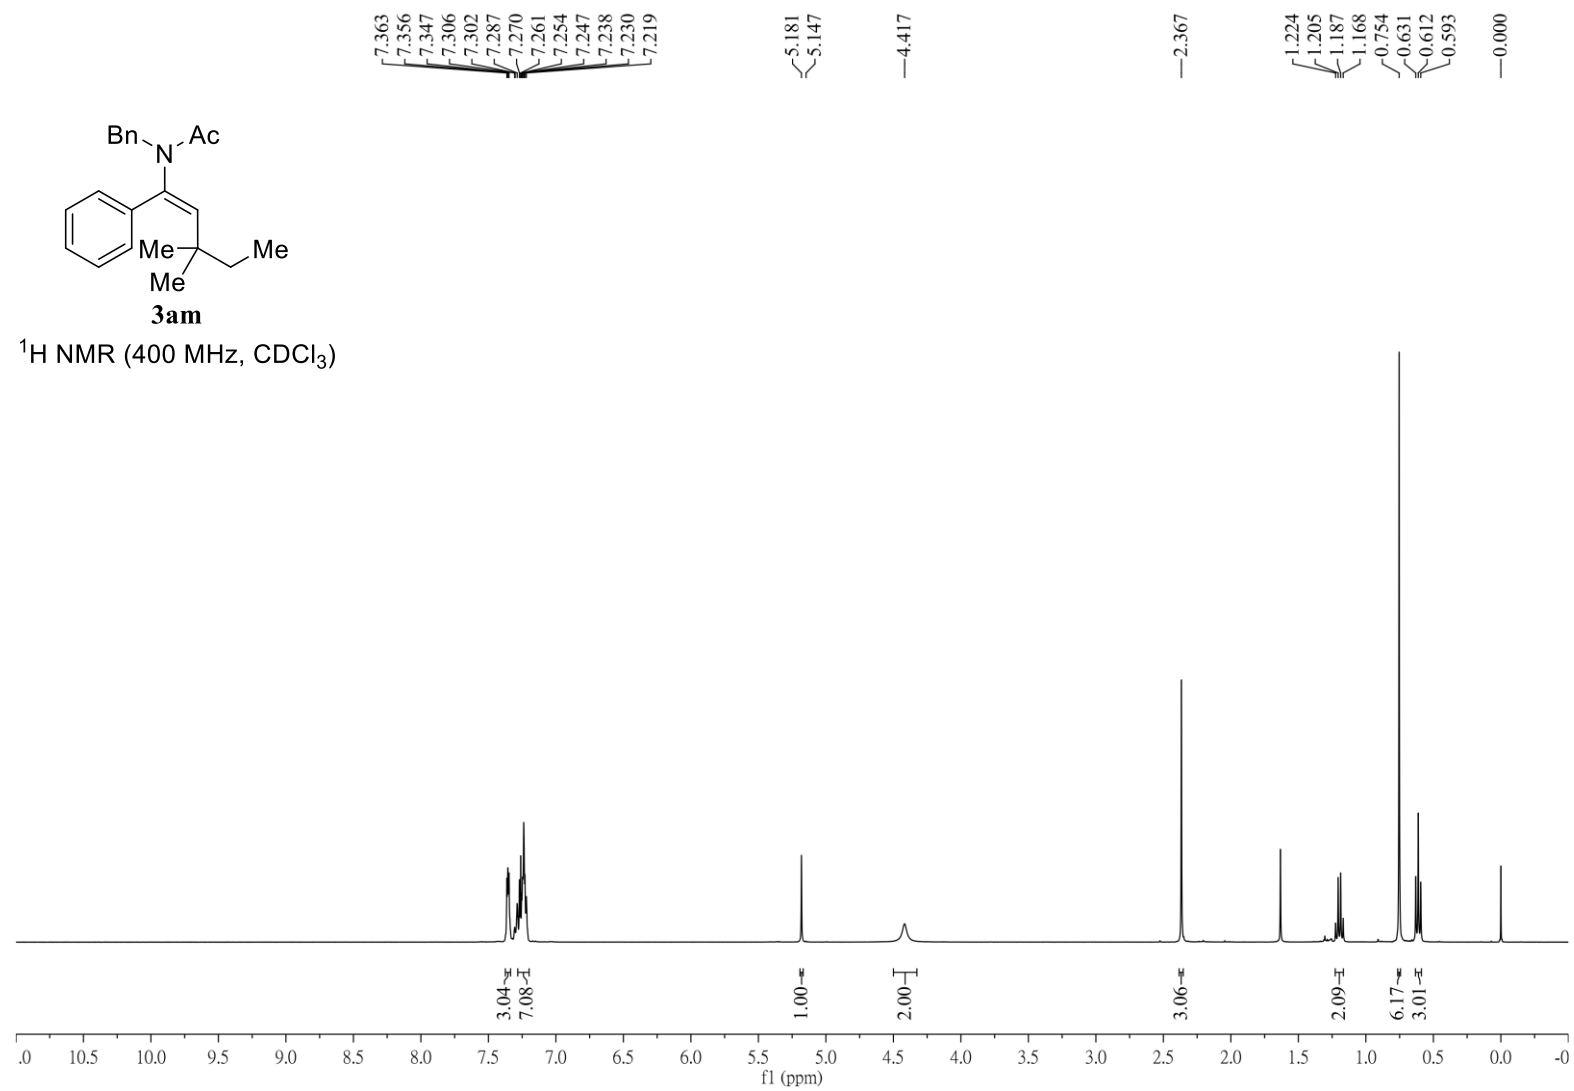

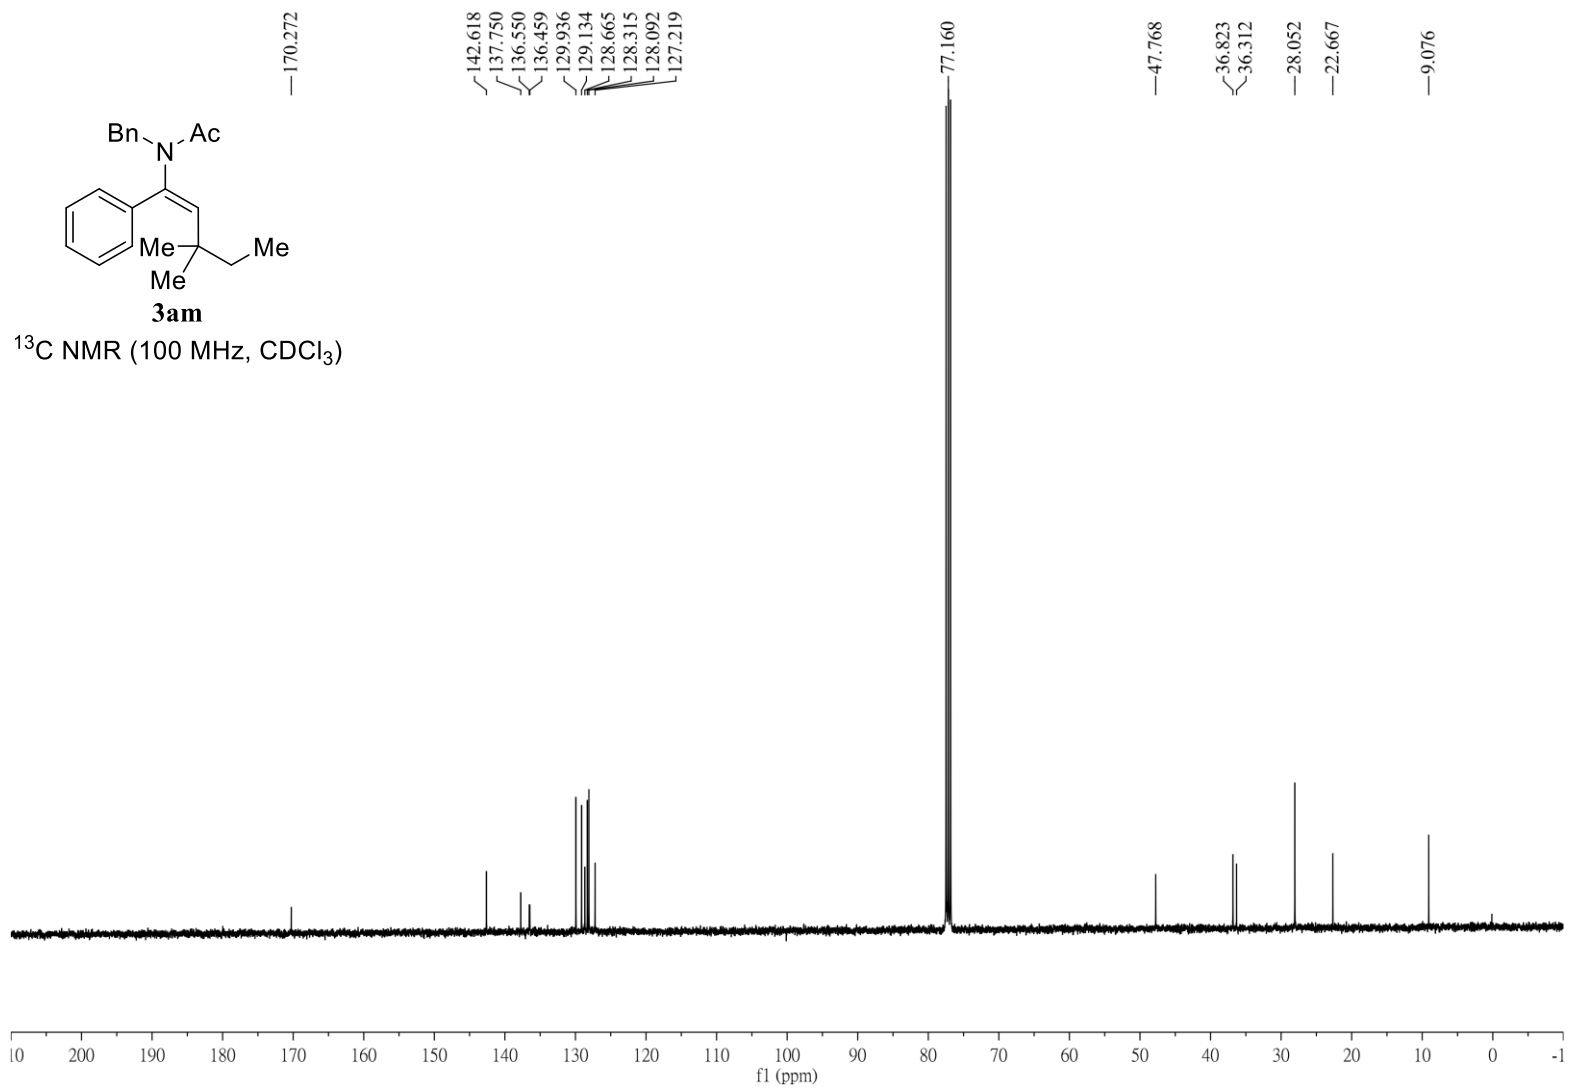

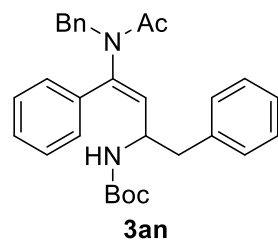

$^1\text{H}$  NMR (400 MHz,  $\text{CDCl}_3$ )

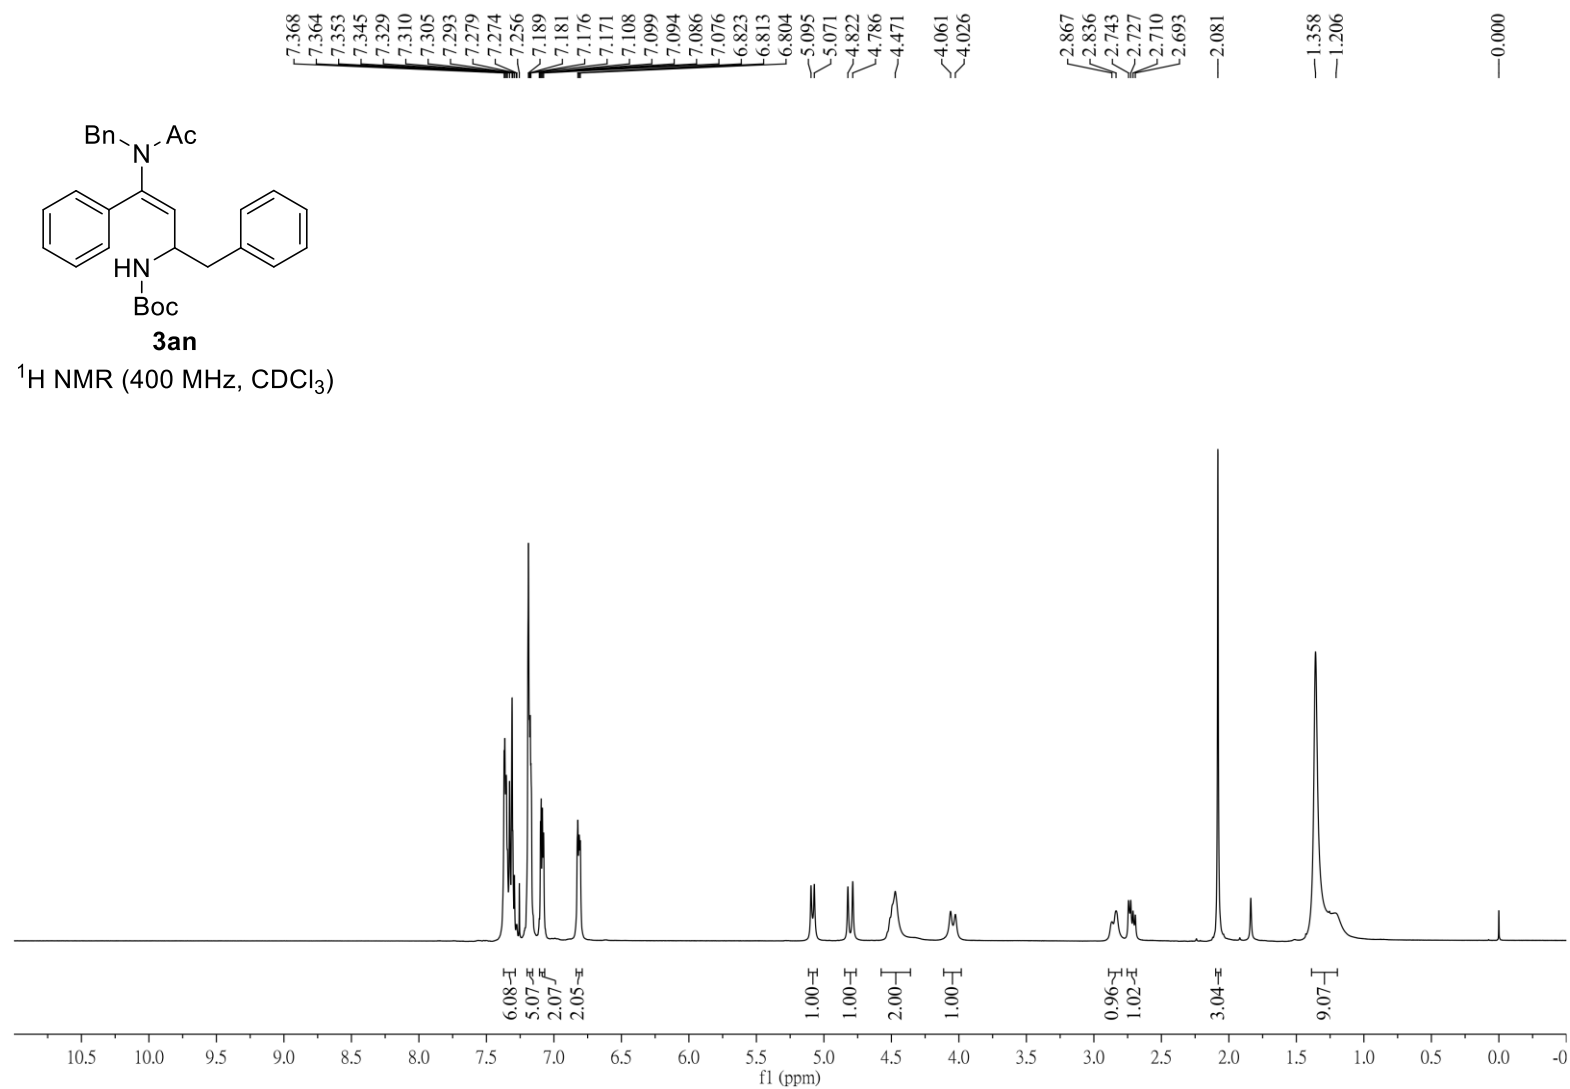

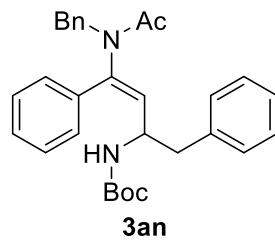

$^{13}\text{C}$  NMR (100 MHz,  $\text{CDCl}_3$ )

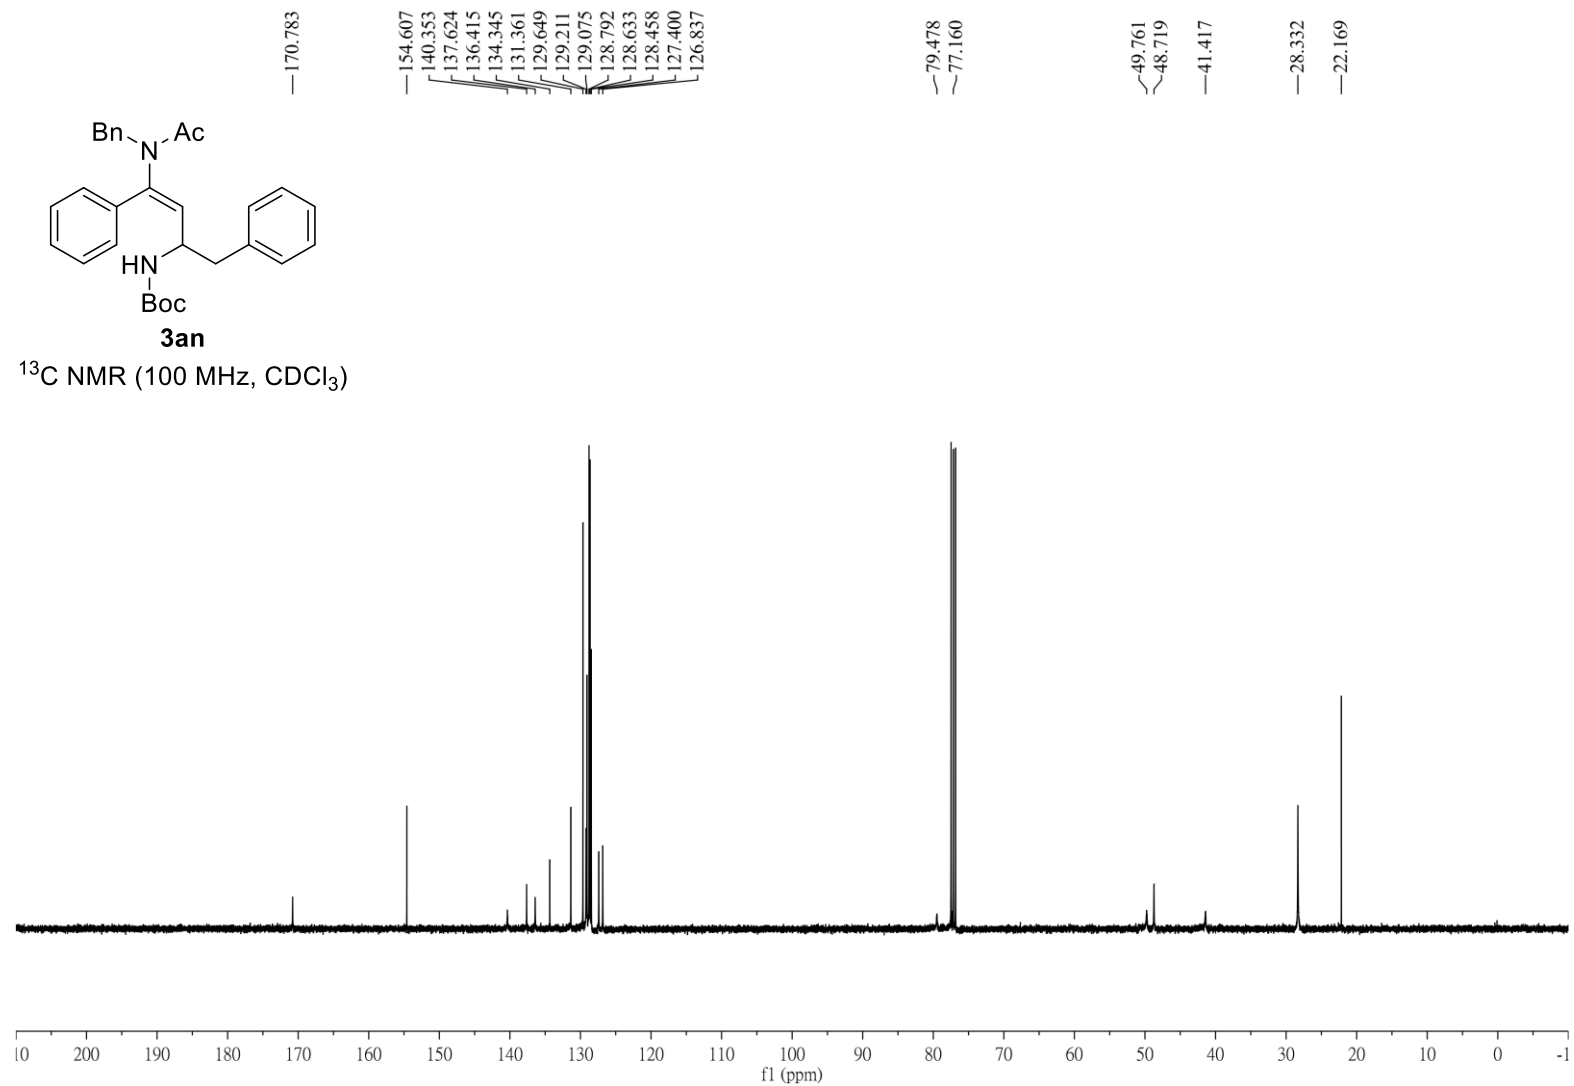



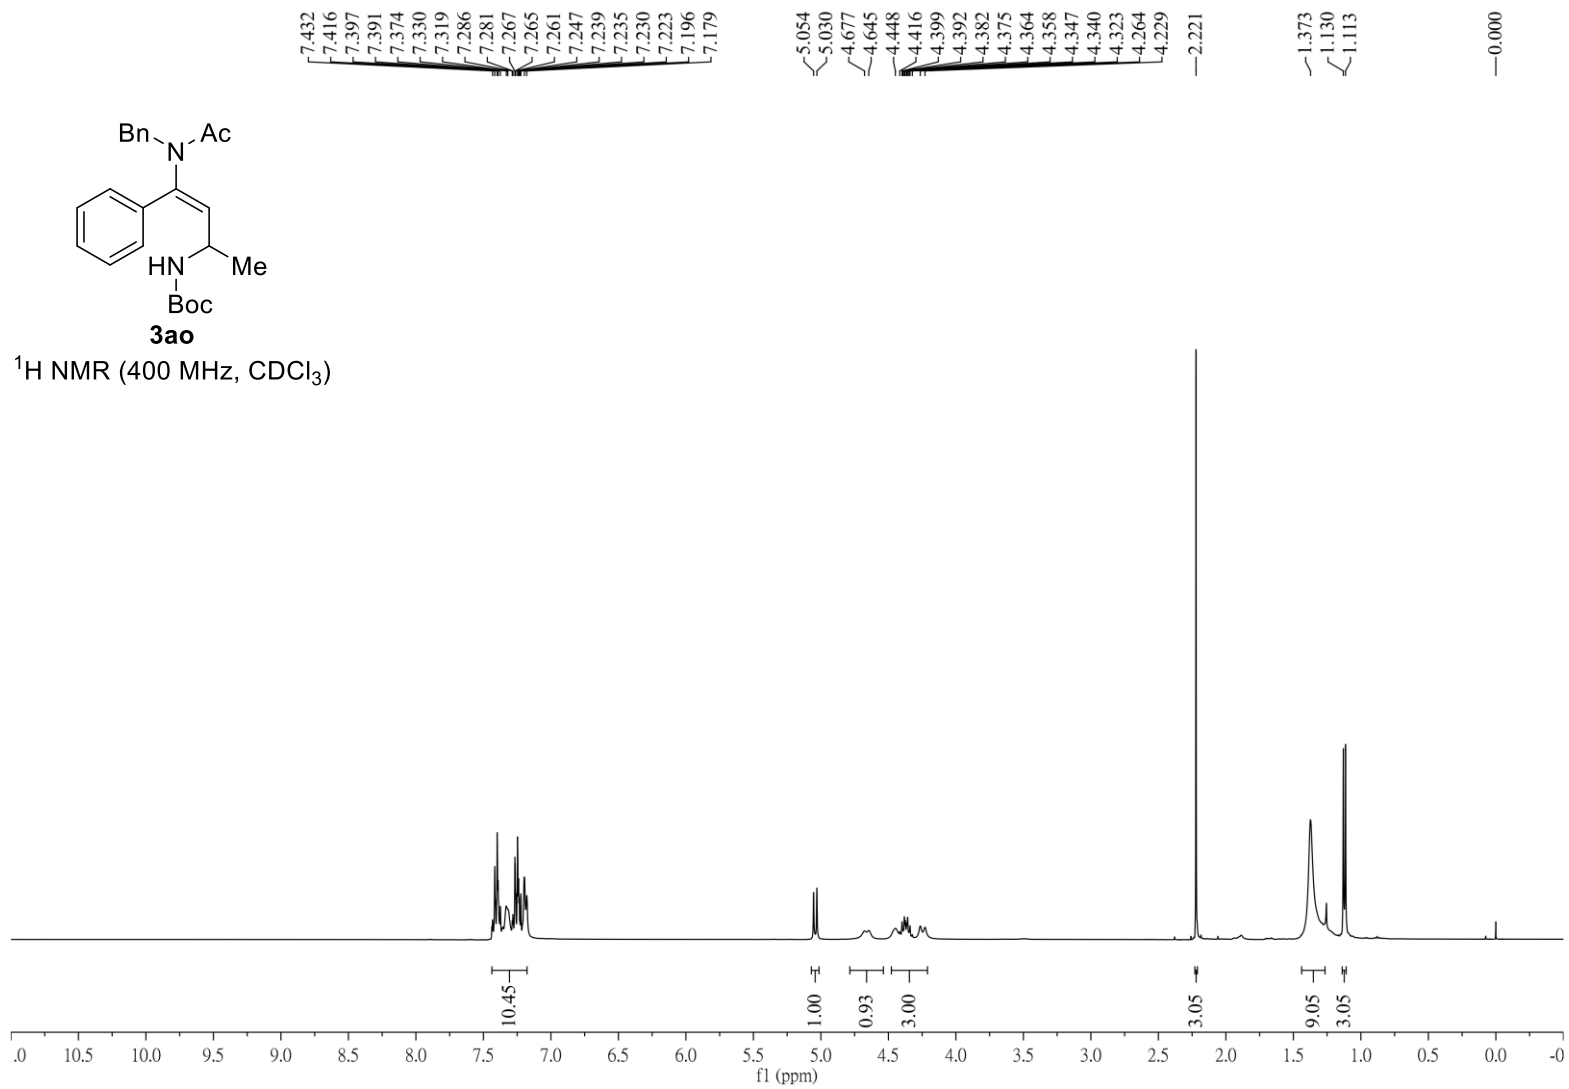

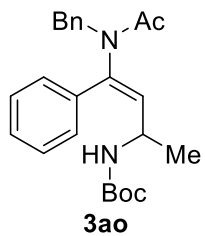

<sup>13</sup>C NMR (100 MHz, CDCl<sub>3</sub>)

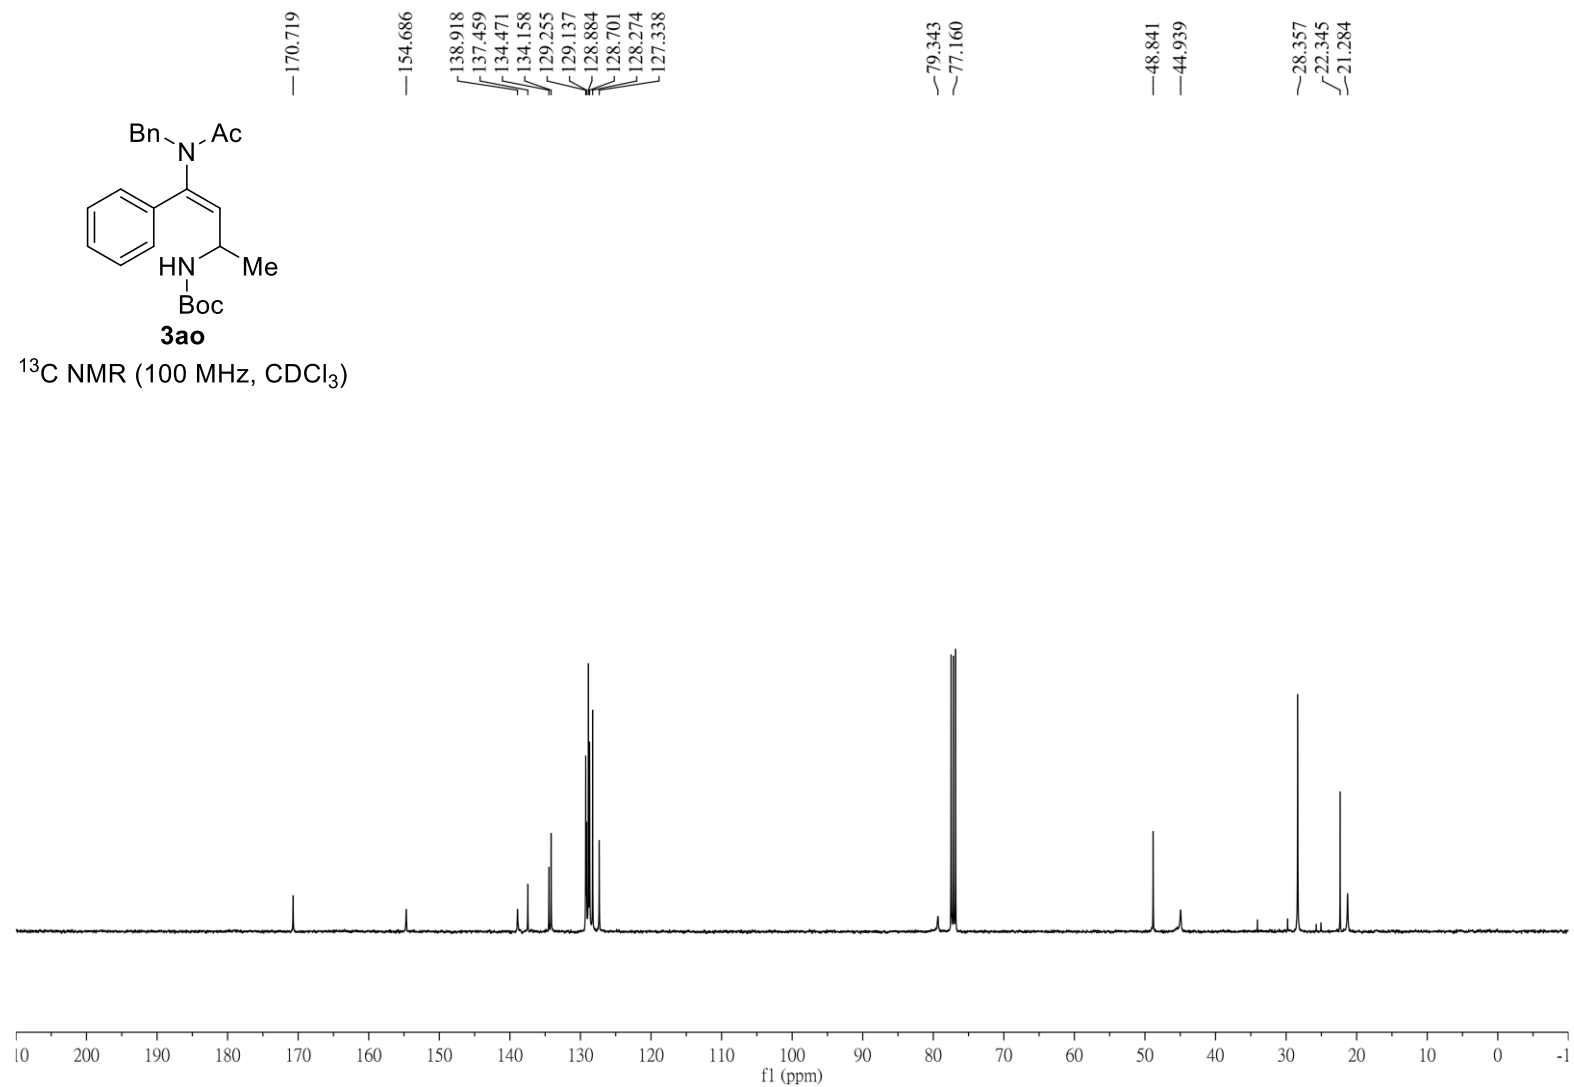

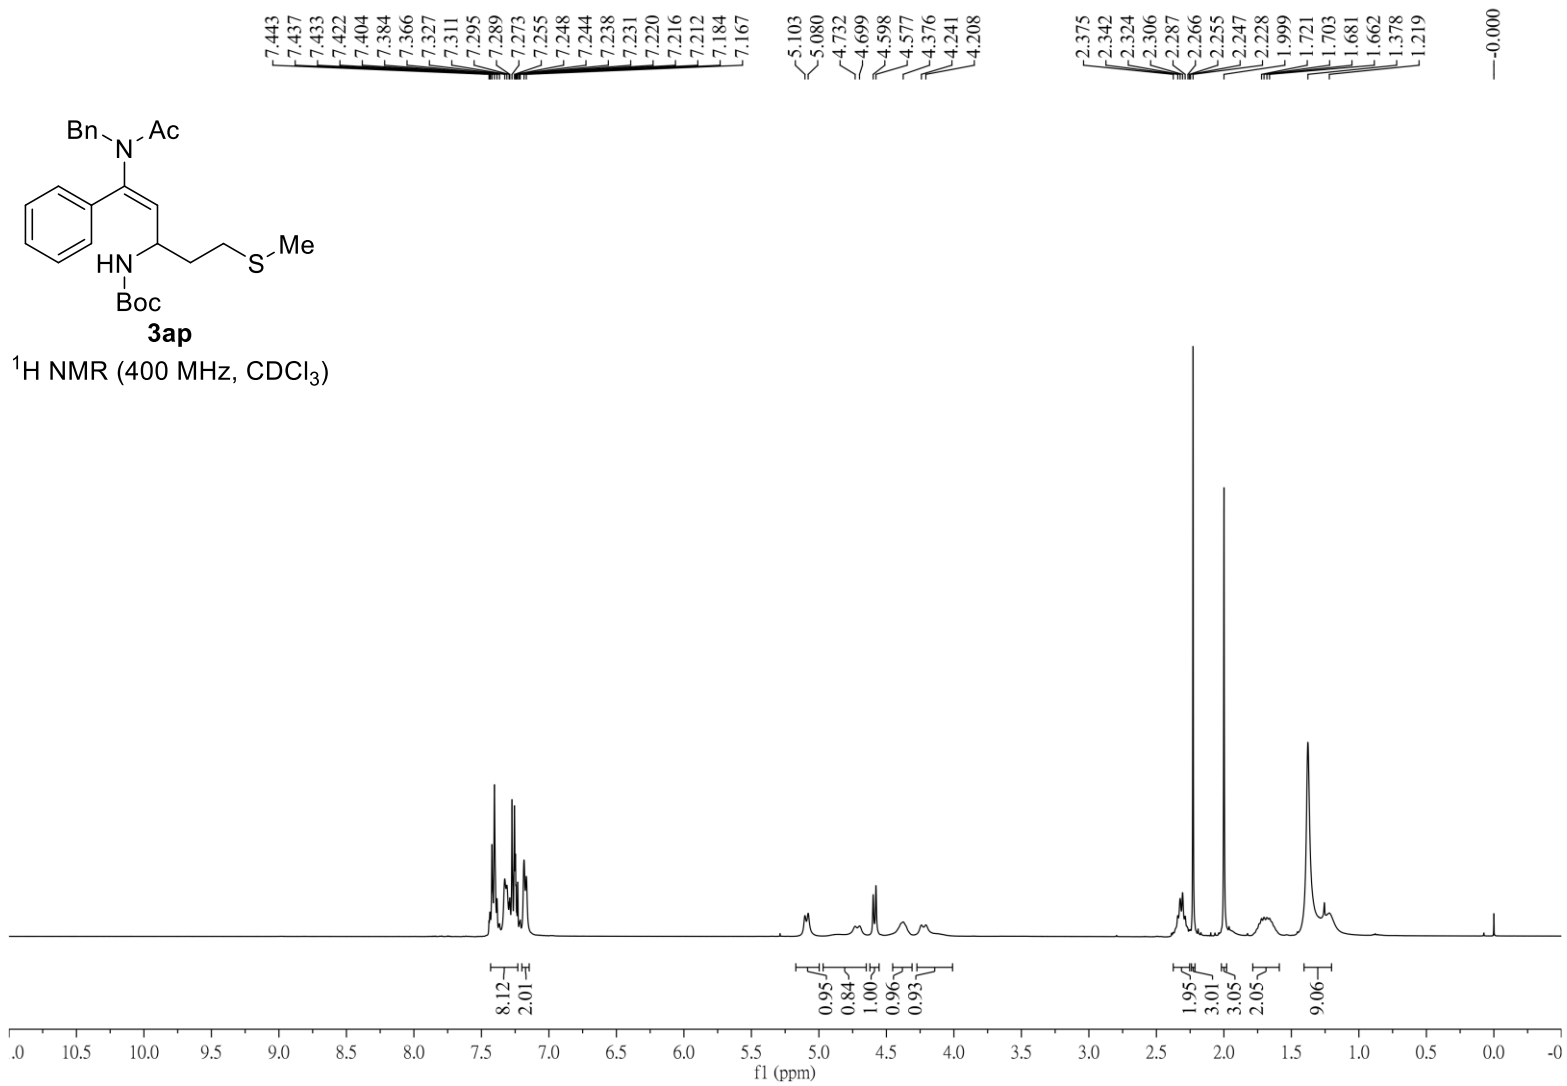

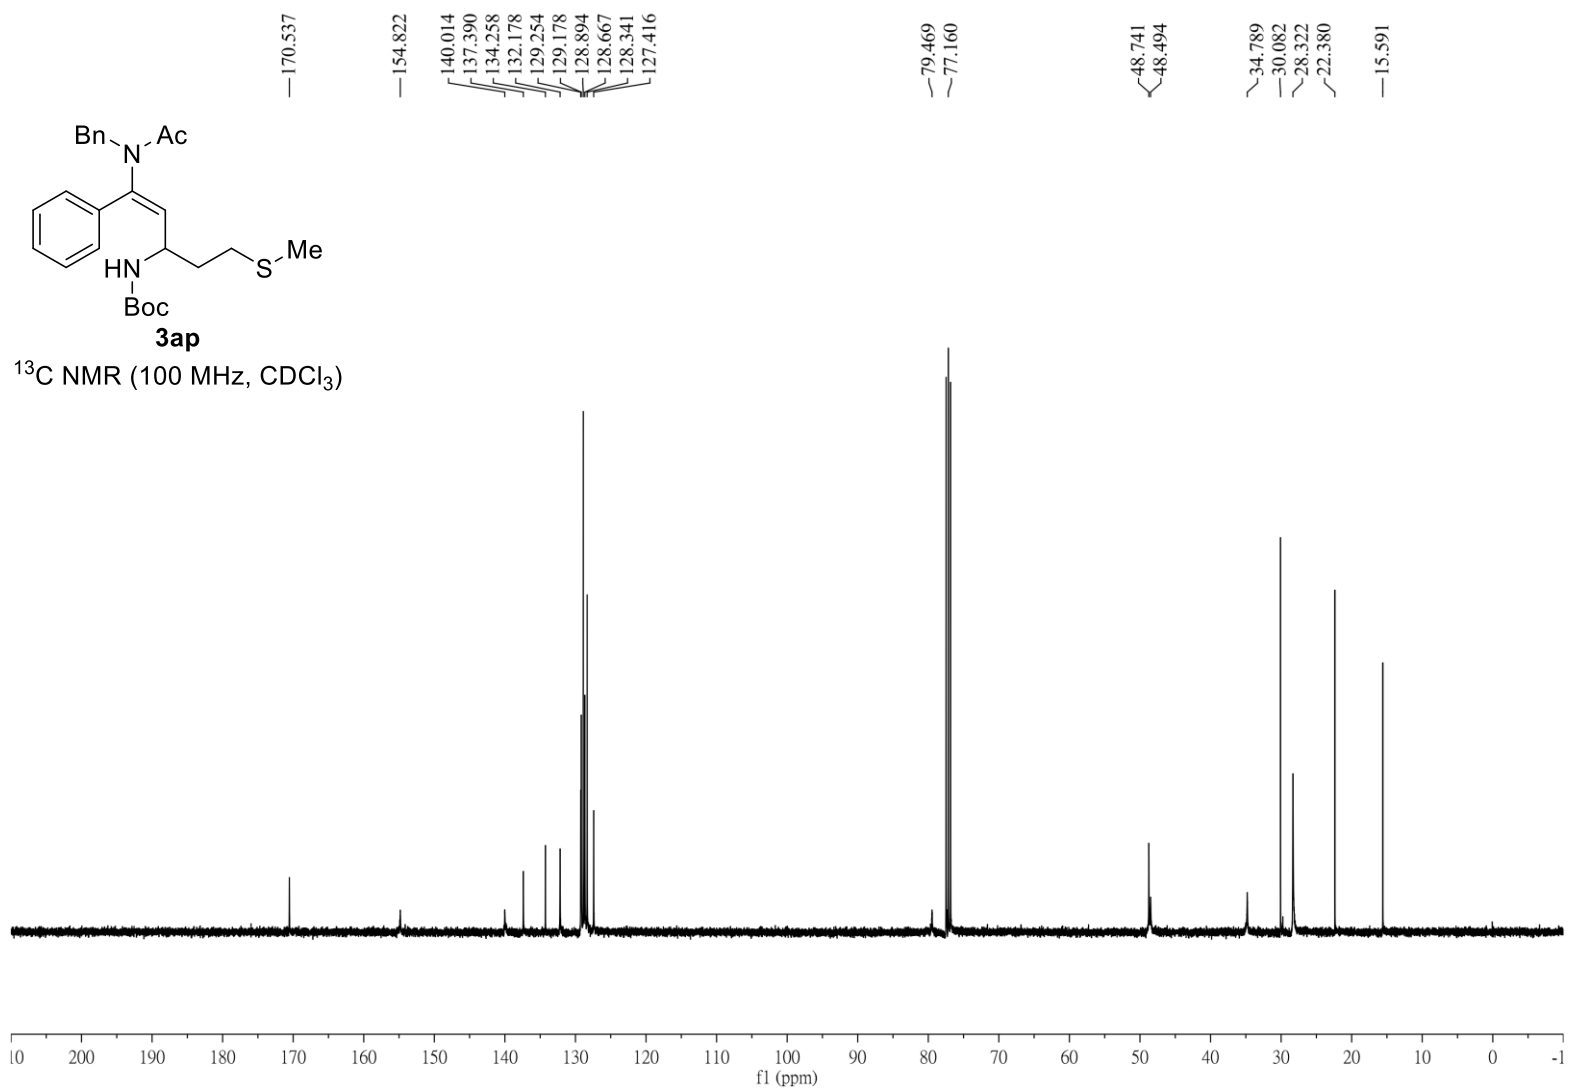

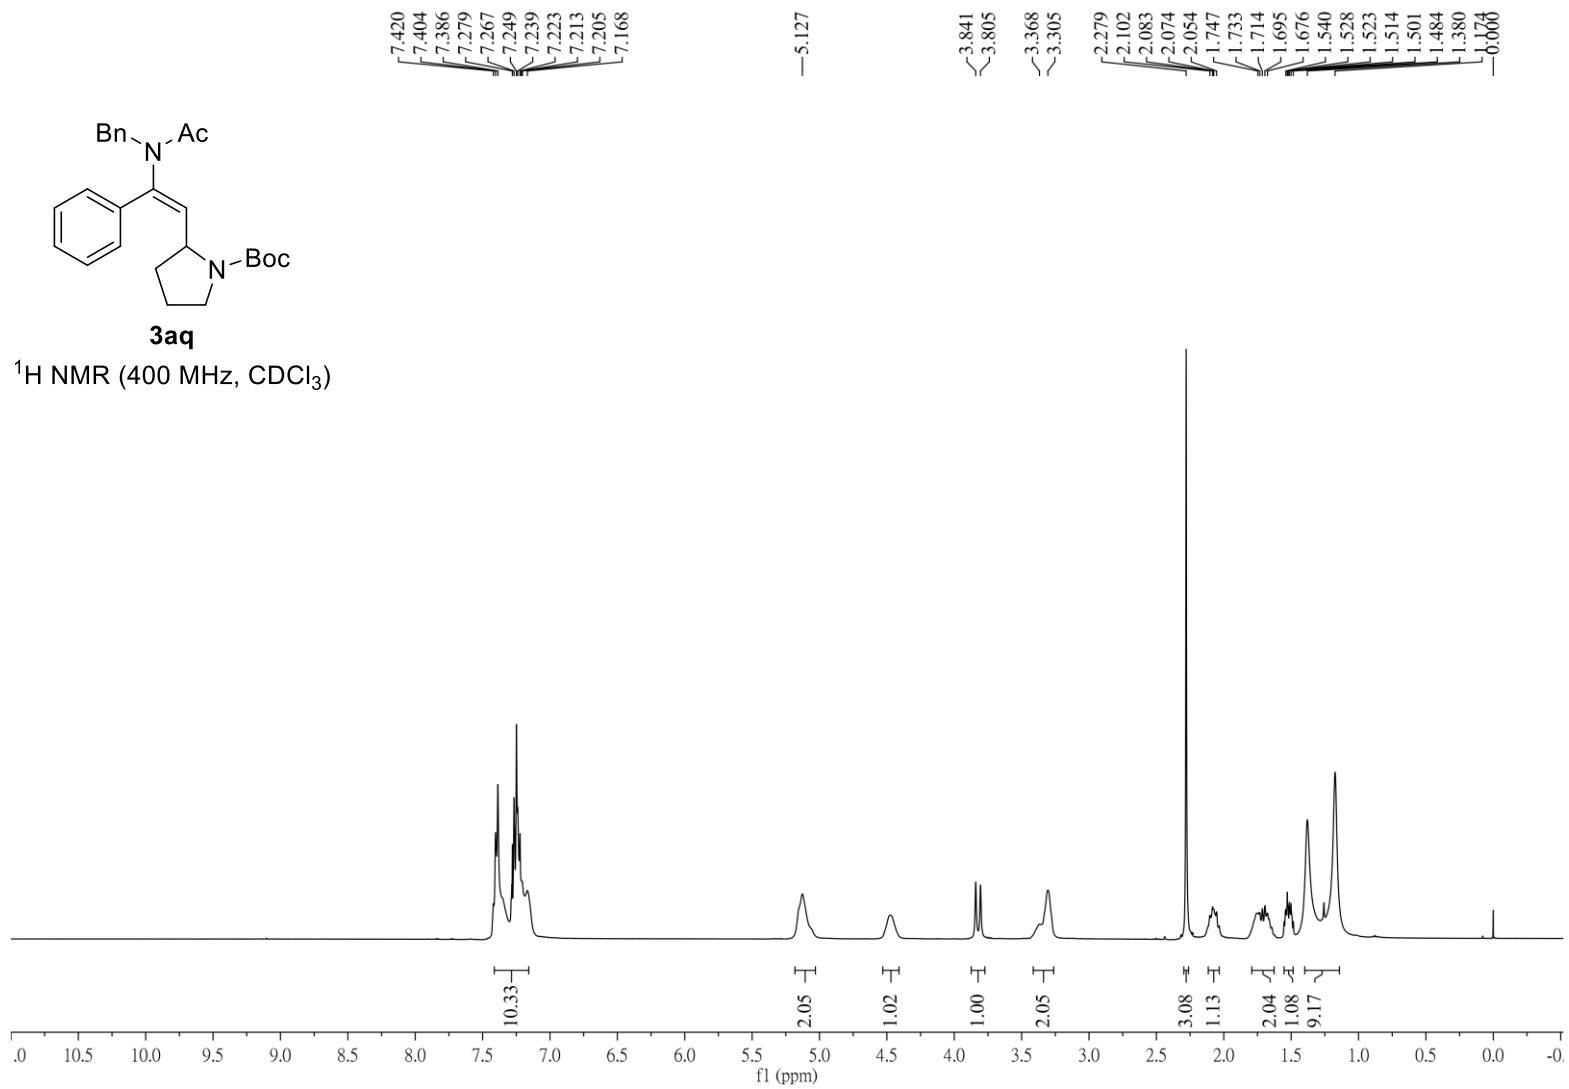

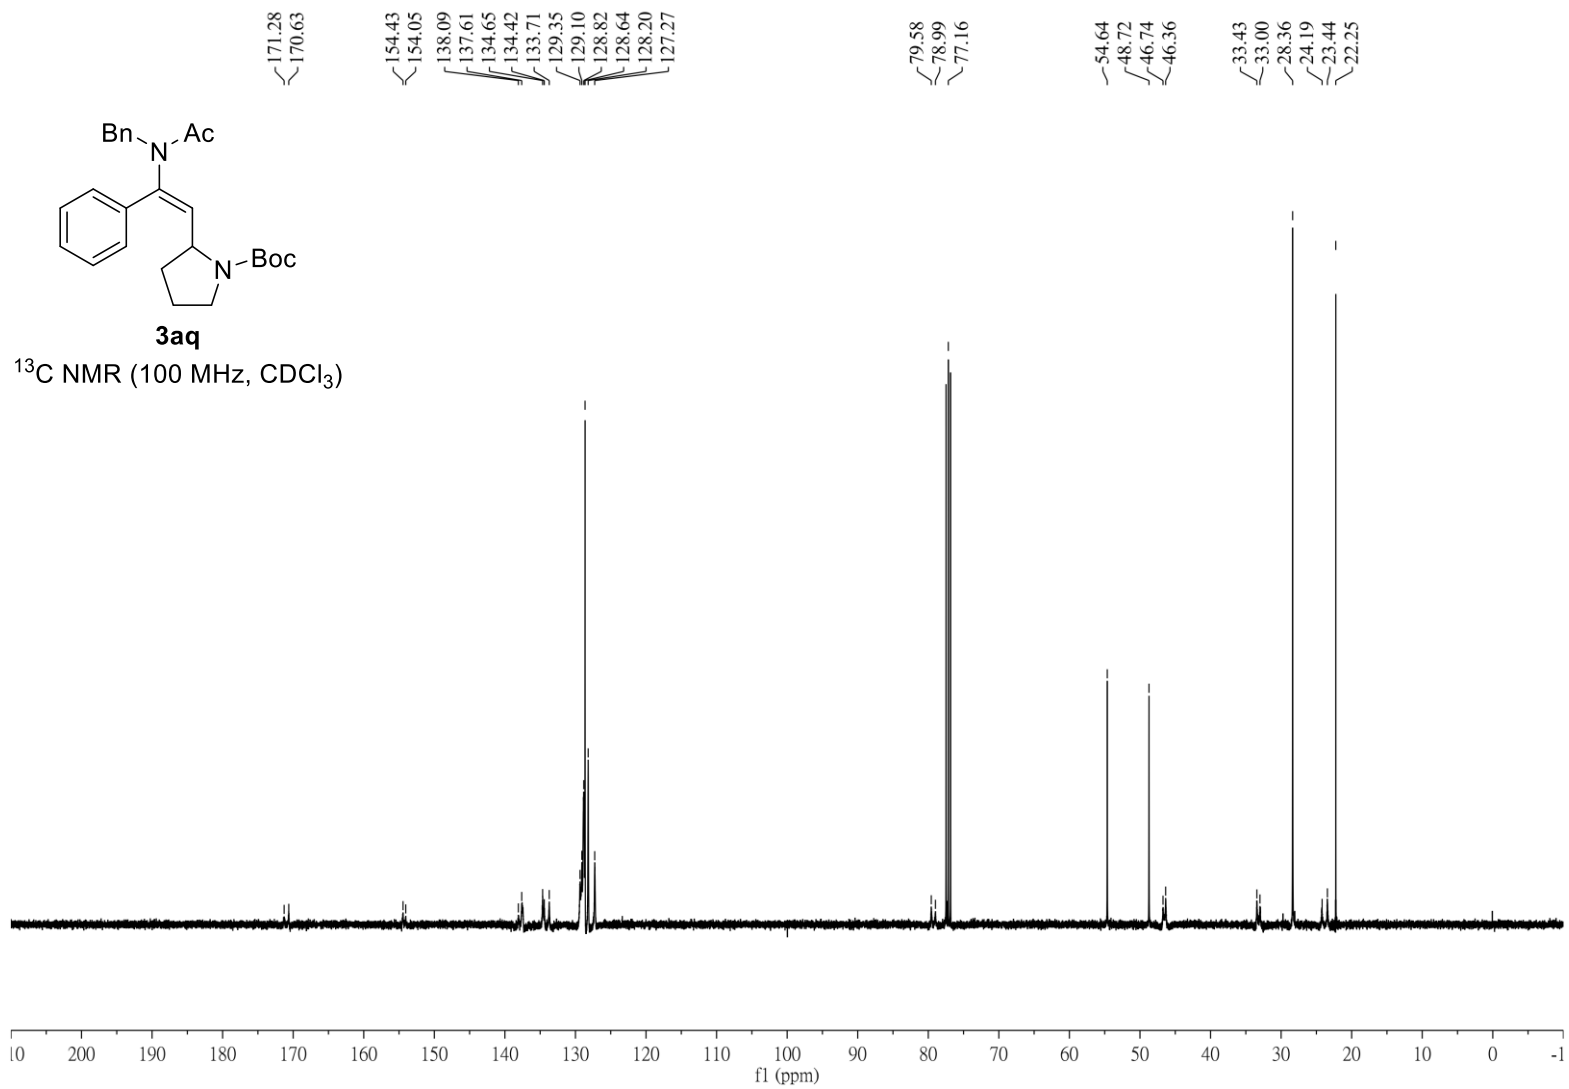

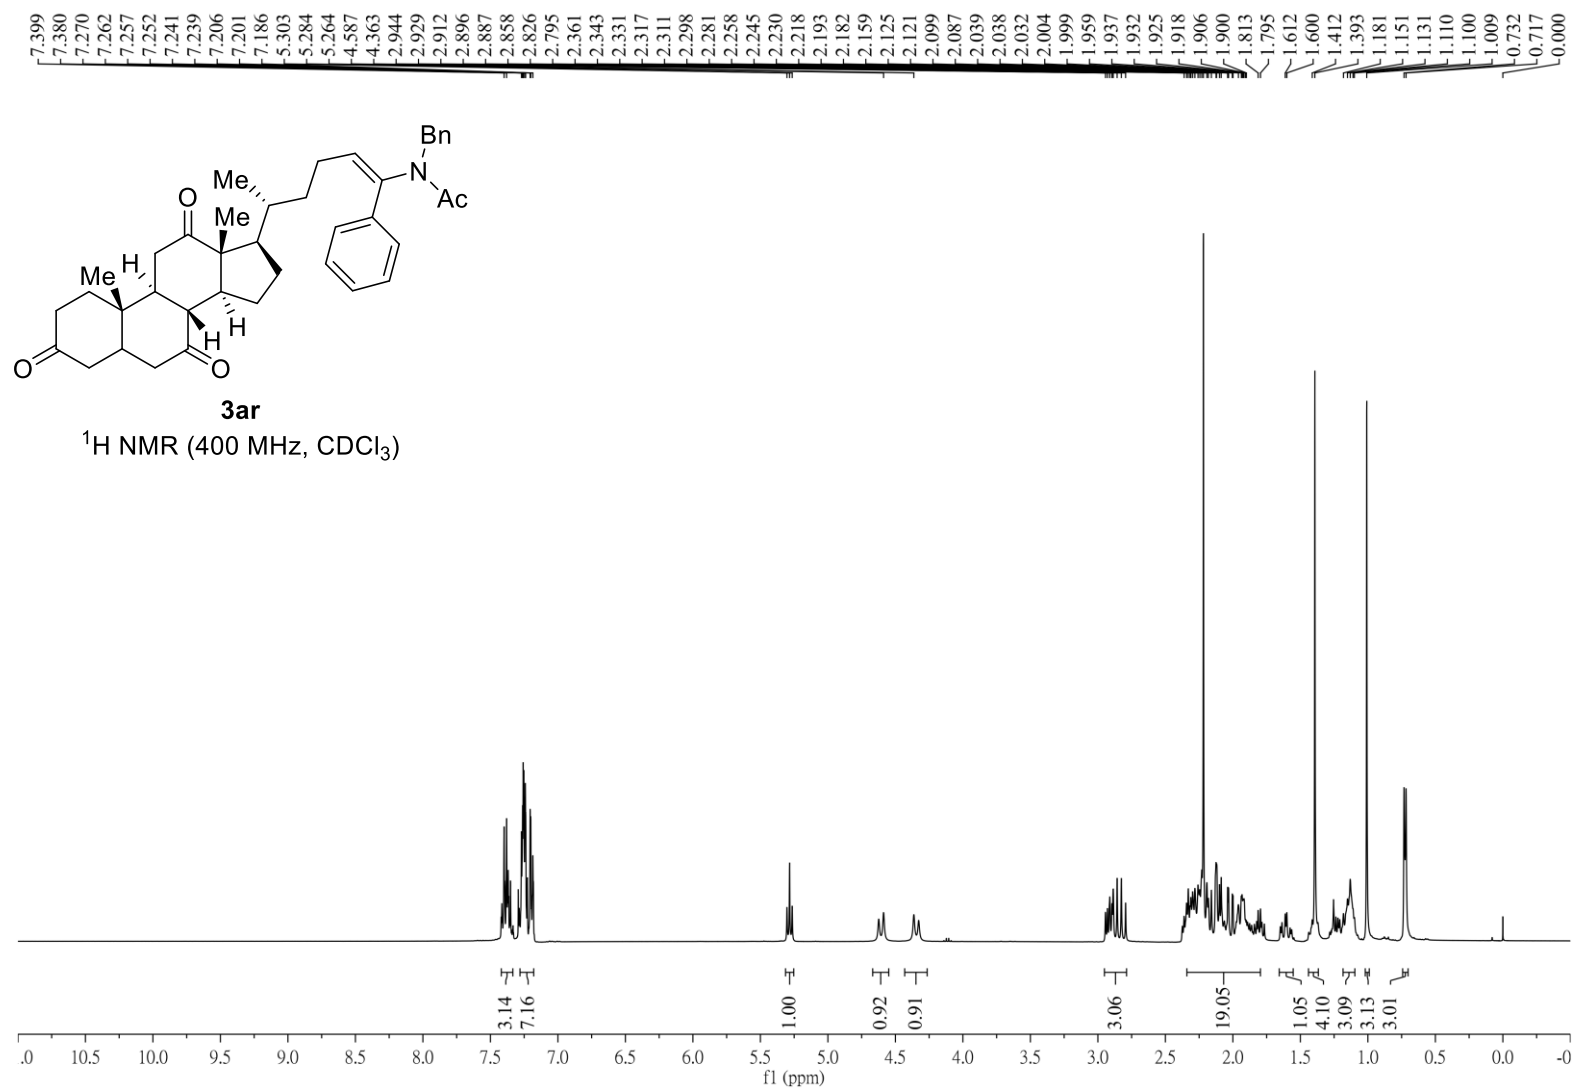

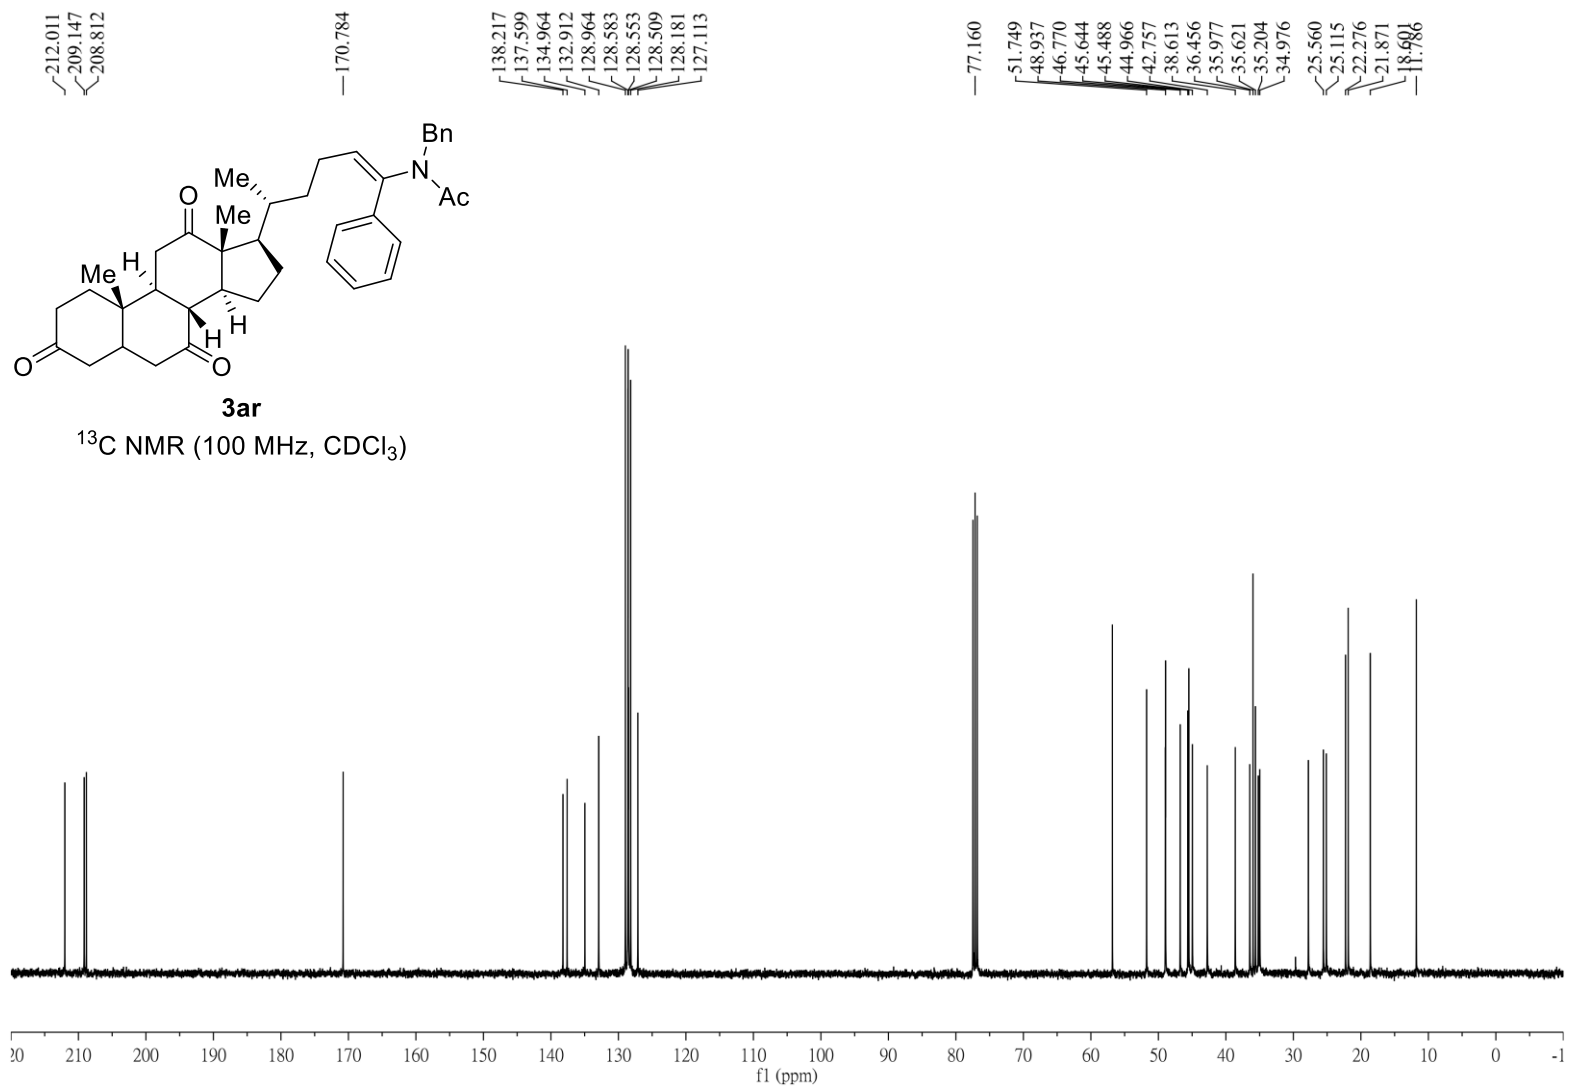



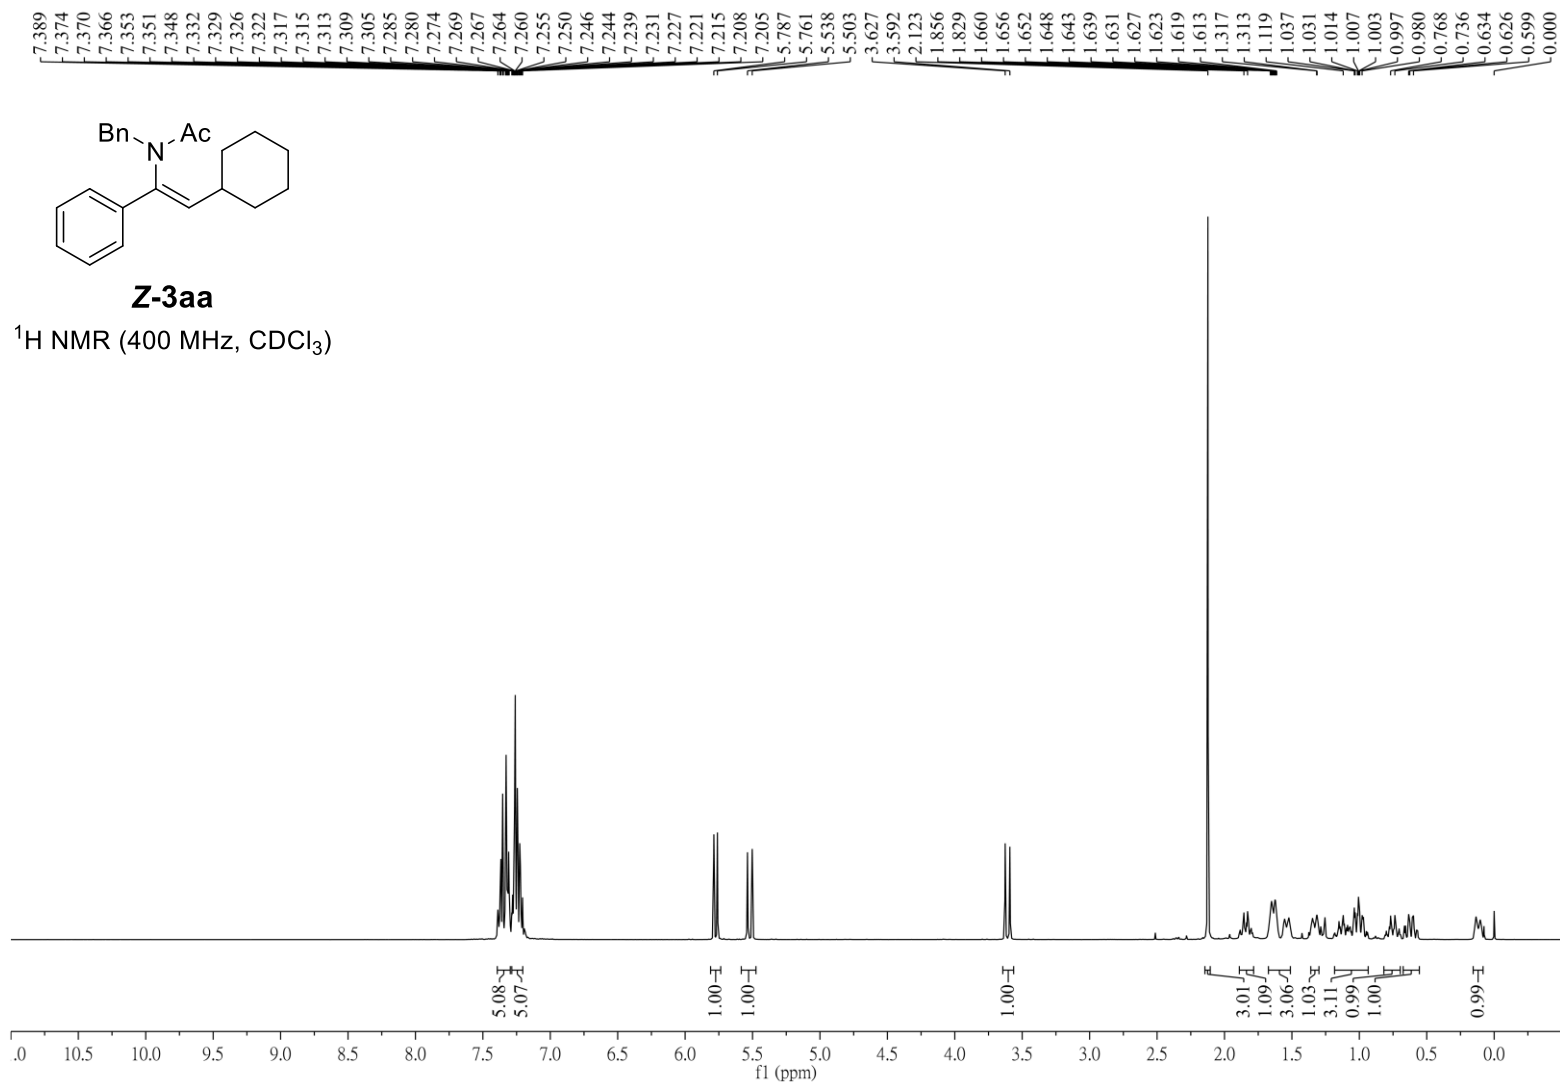

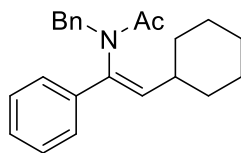

**Z-3aa**

$^{13}\text{C}$  NMR (100 MHz,  $\text{CDCl}_3$ )

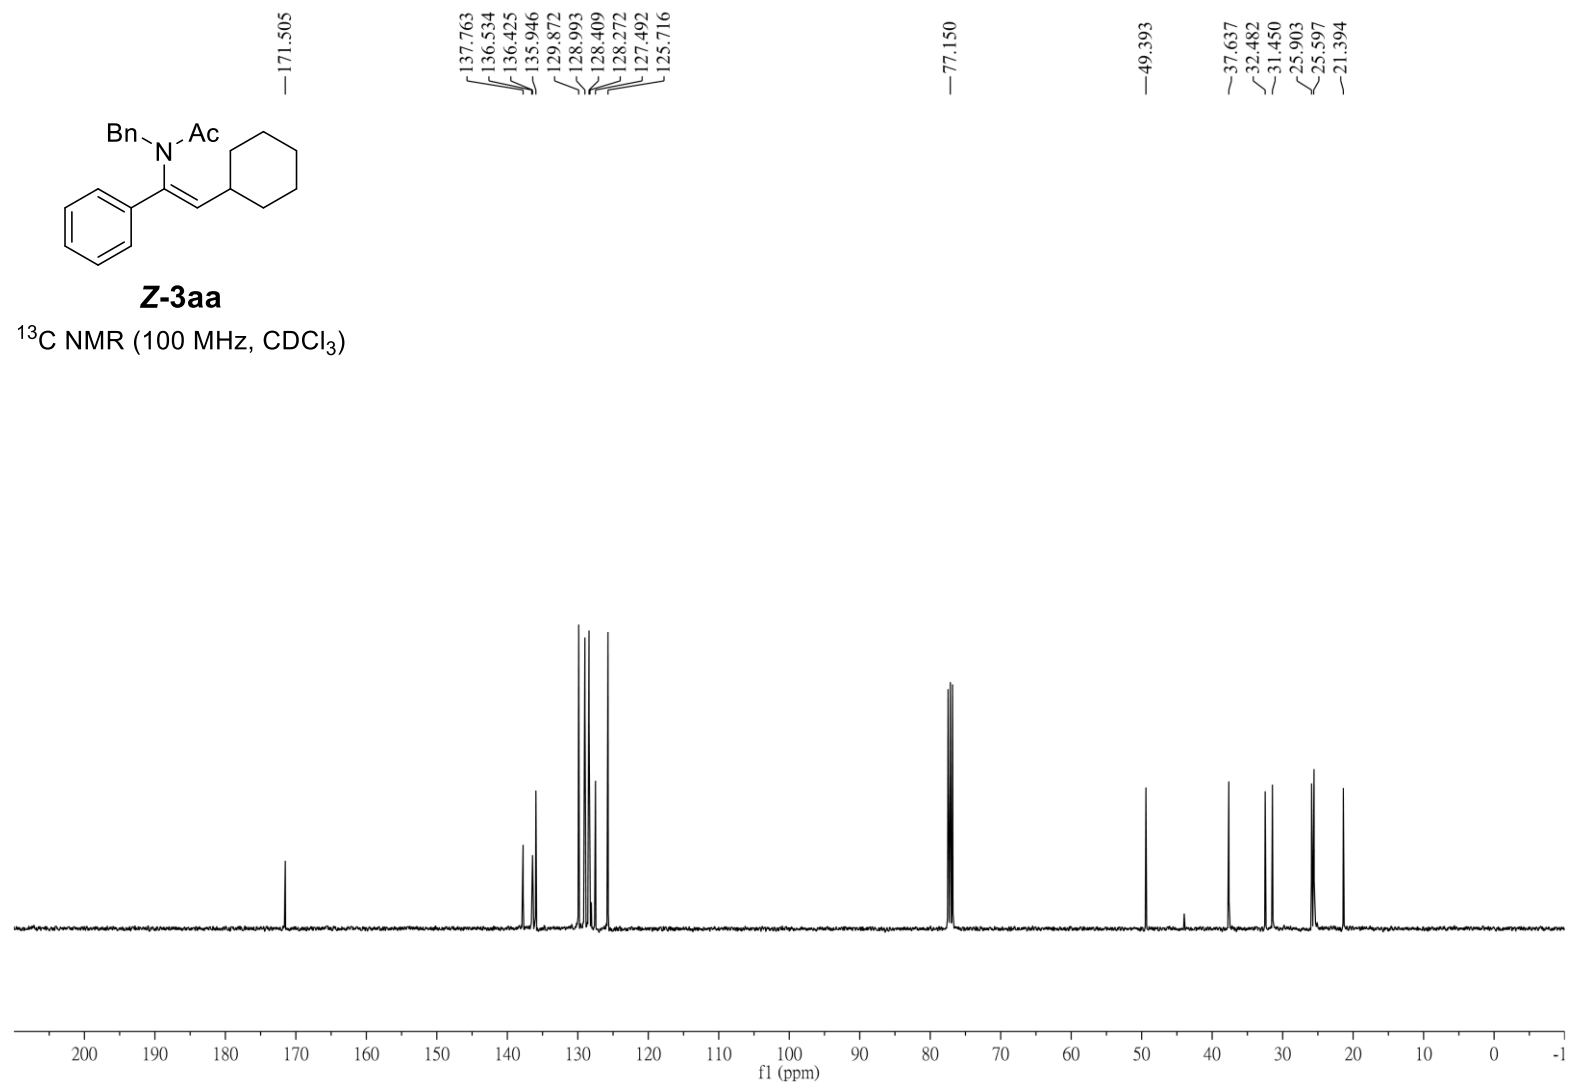

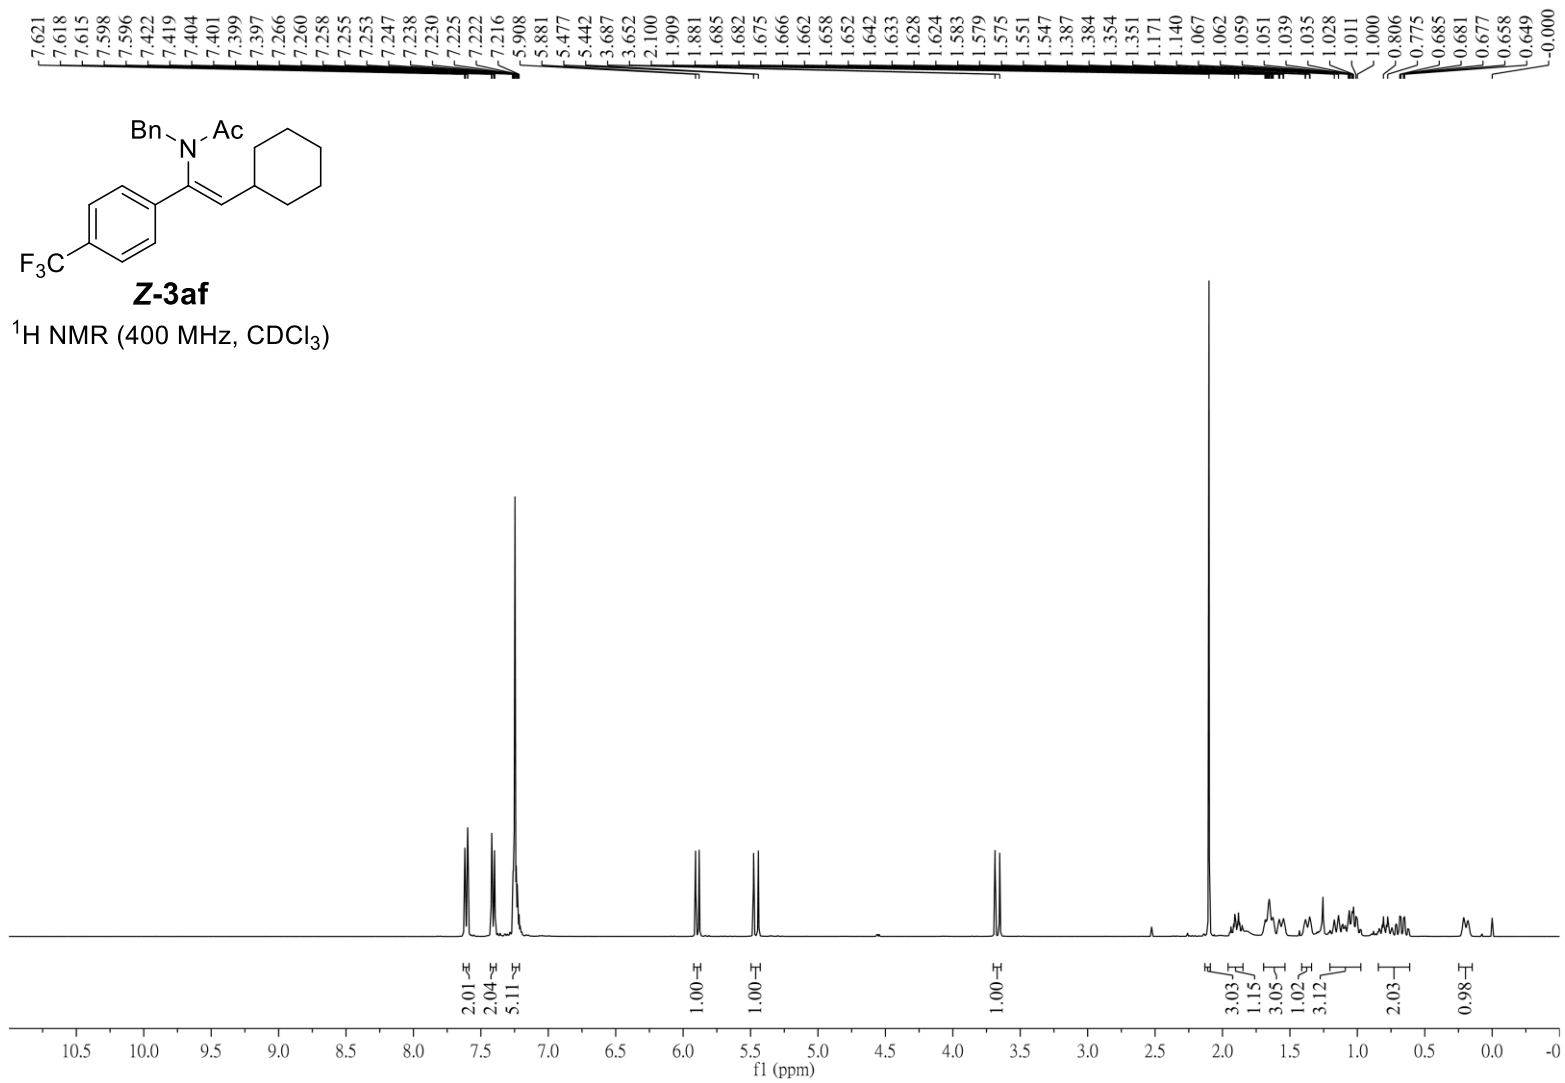

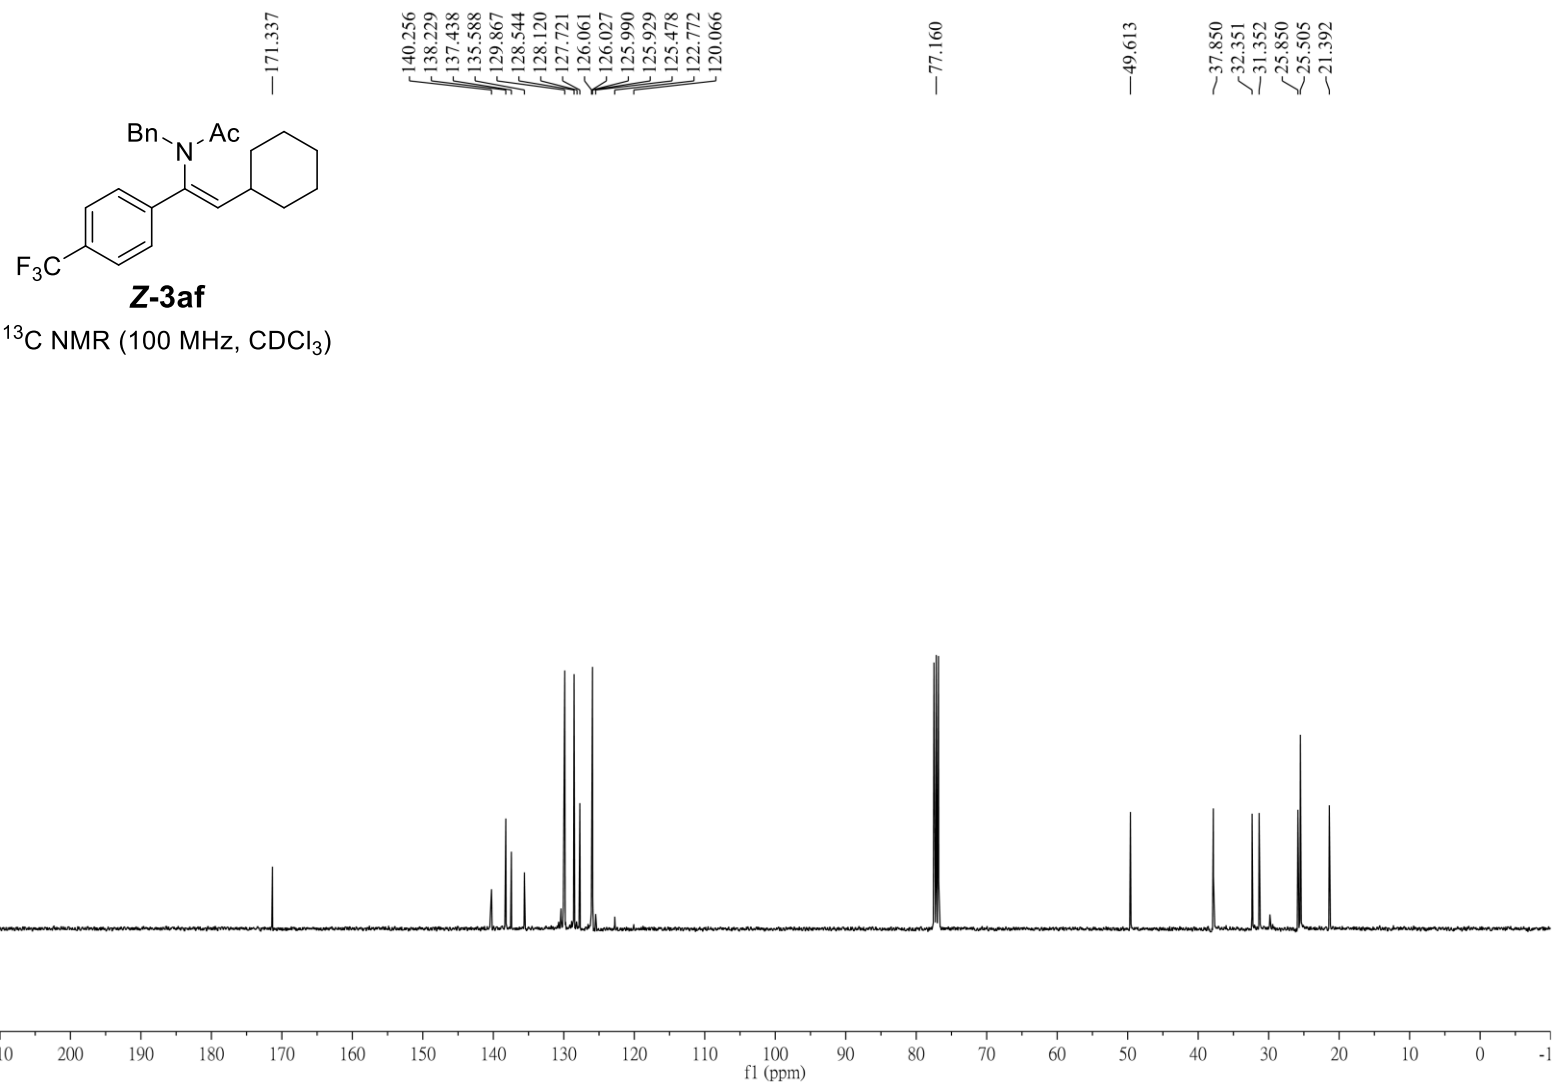

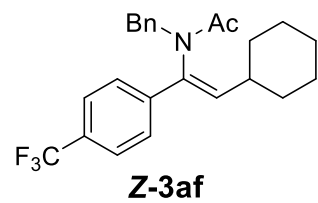

$^{19}\text{F}$  NMR (376 MHz,  $\text{CDCl}_3$ )

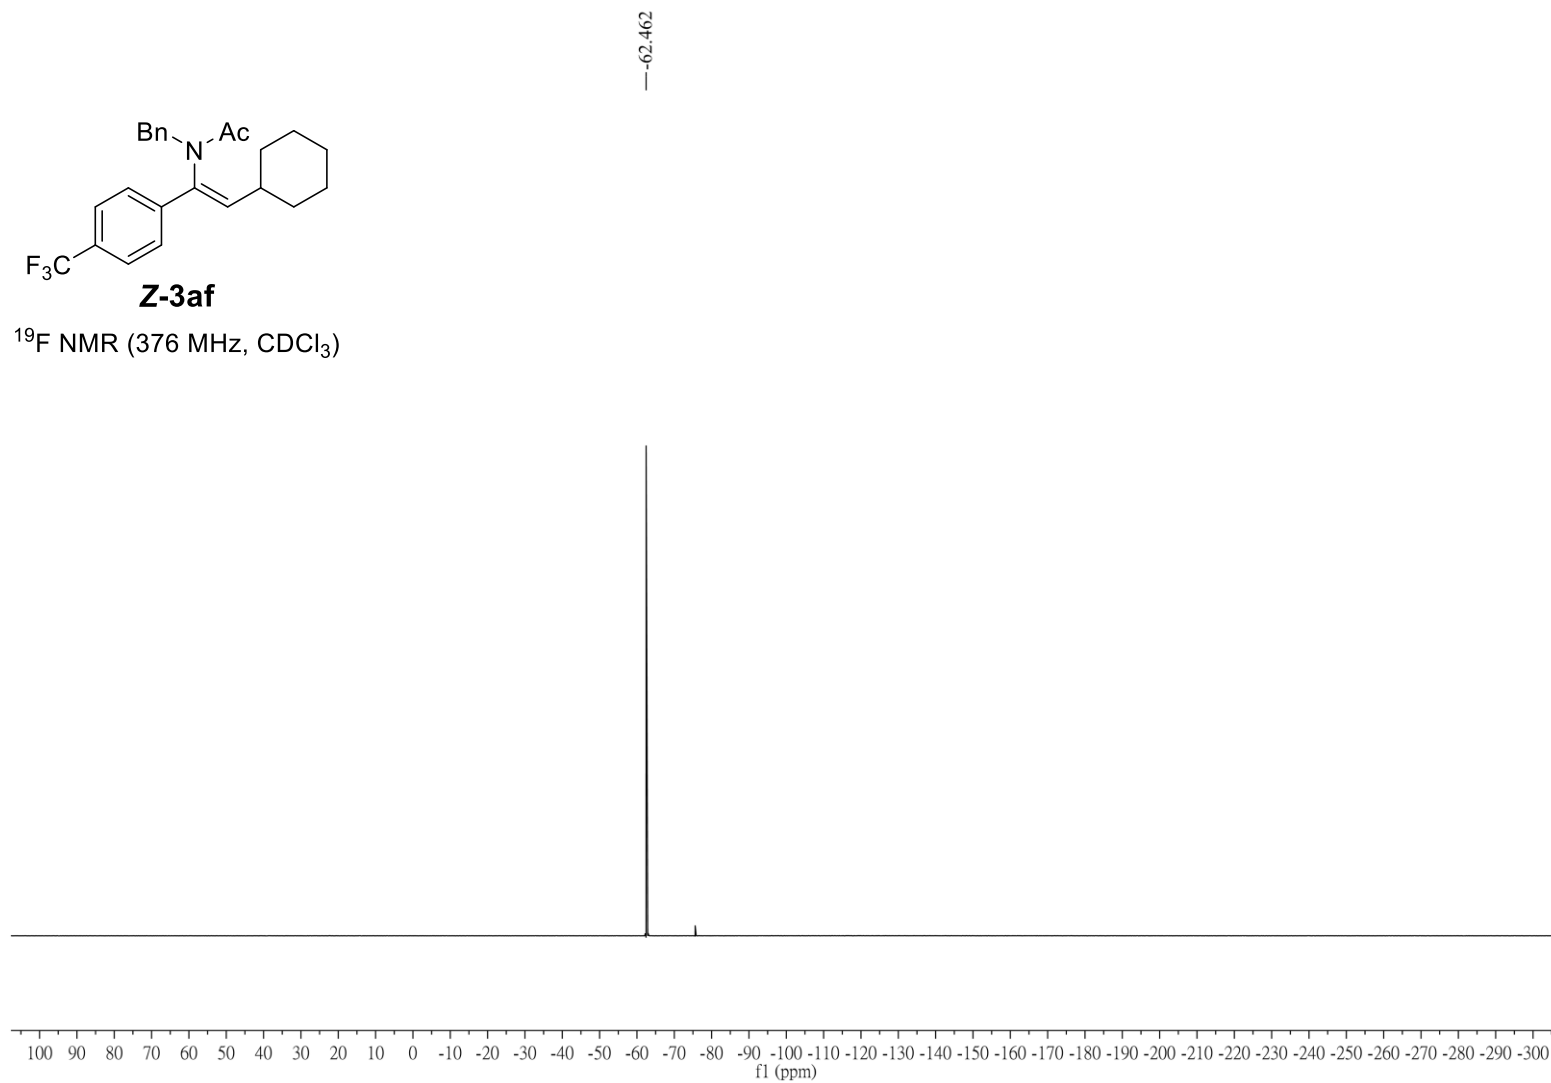

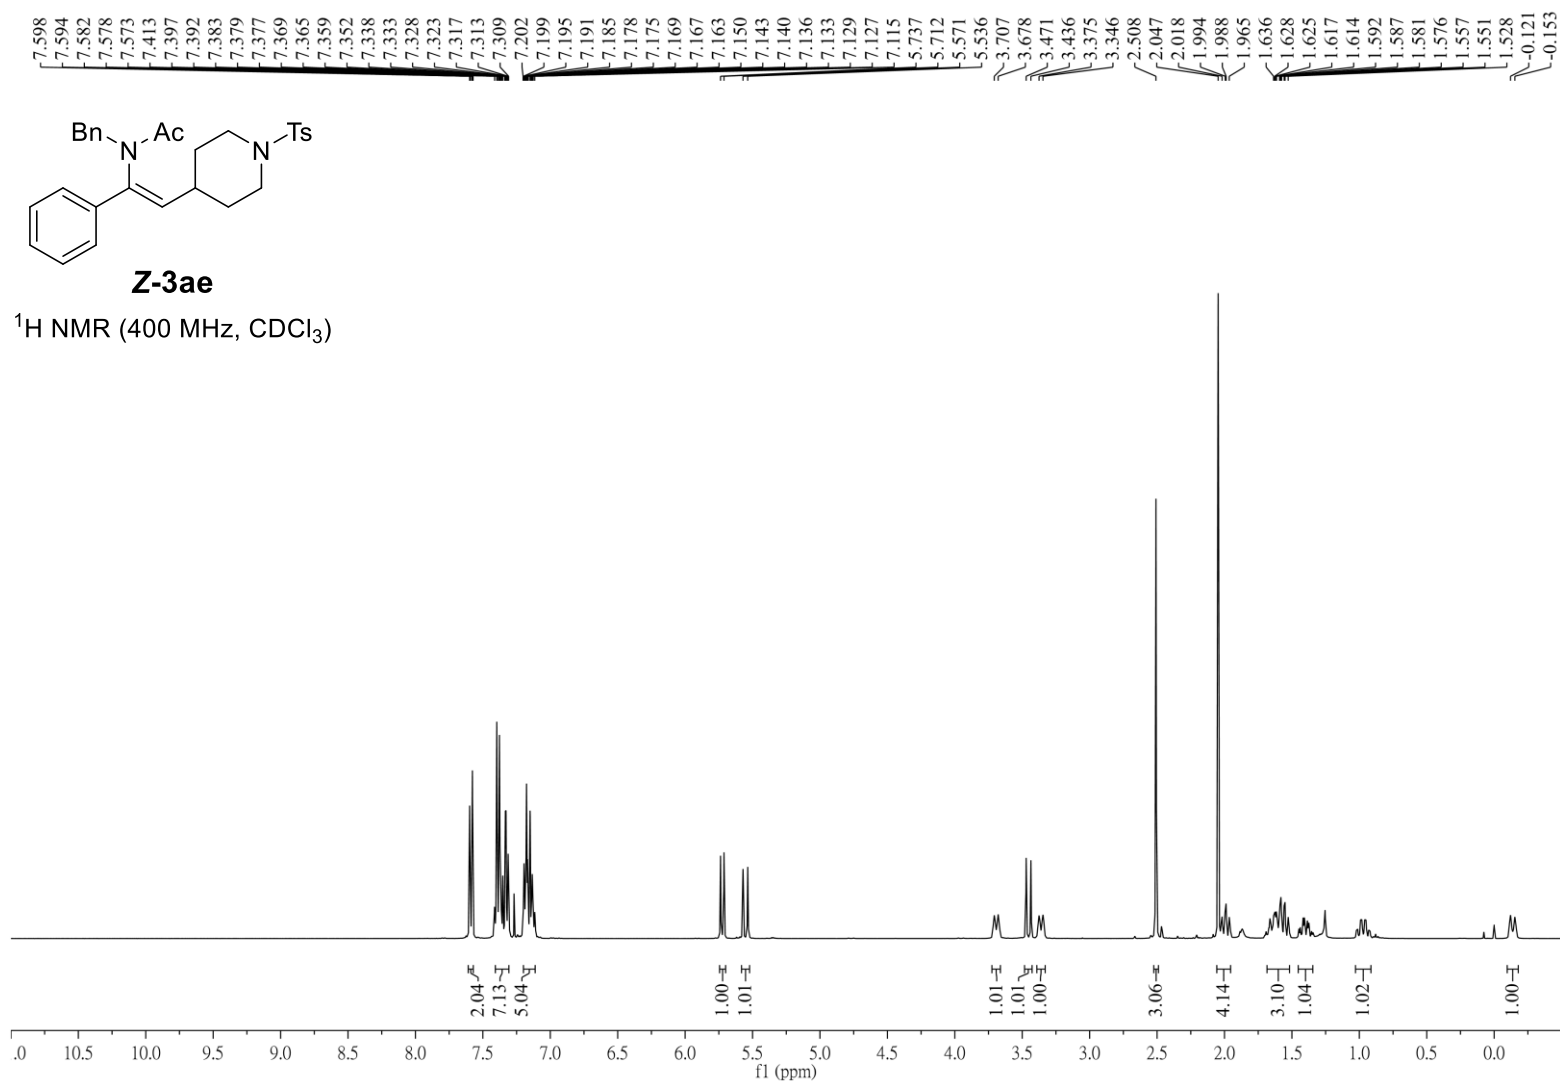

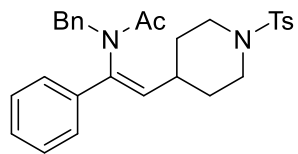

**Z-3ae**

$^{13}\text{C}$  NMR (100 MHz,  $\text{CDCl}_3$ )

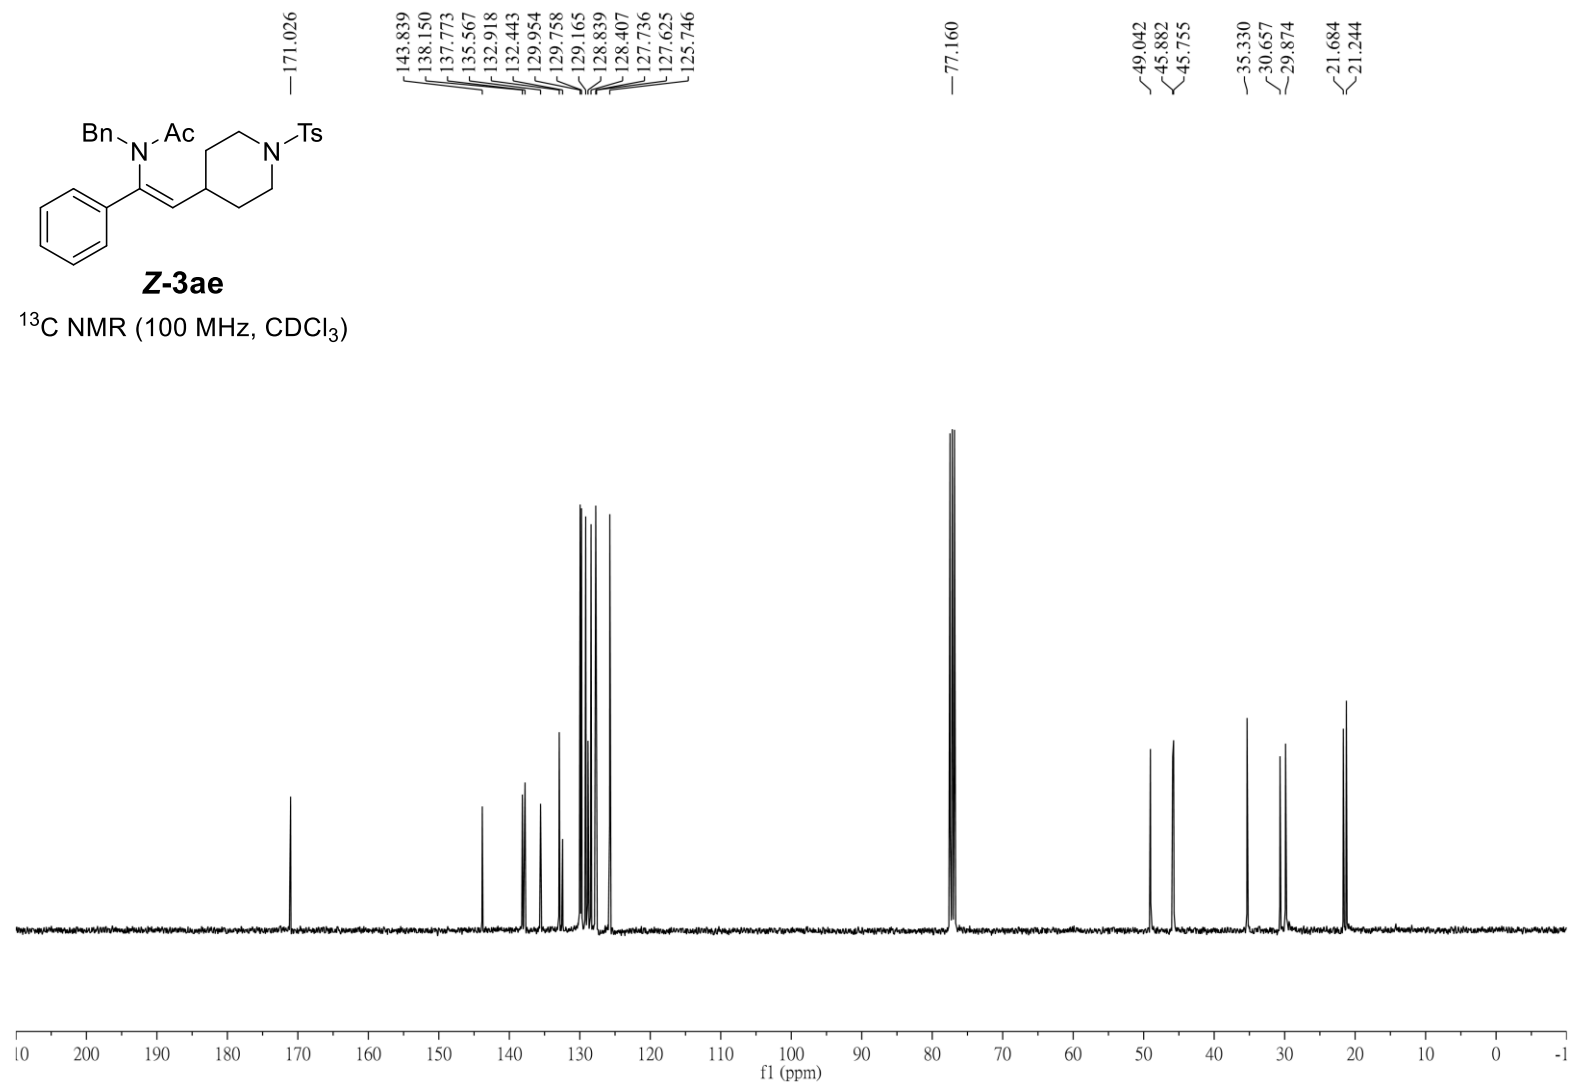

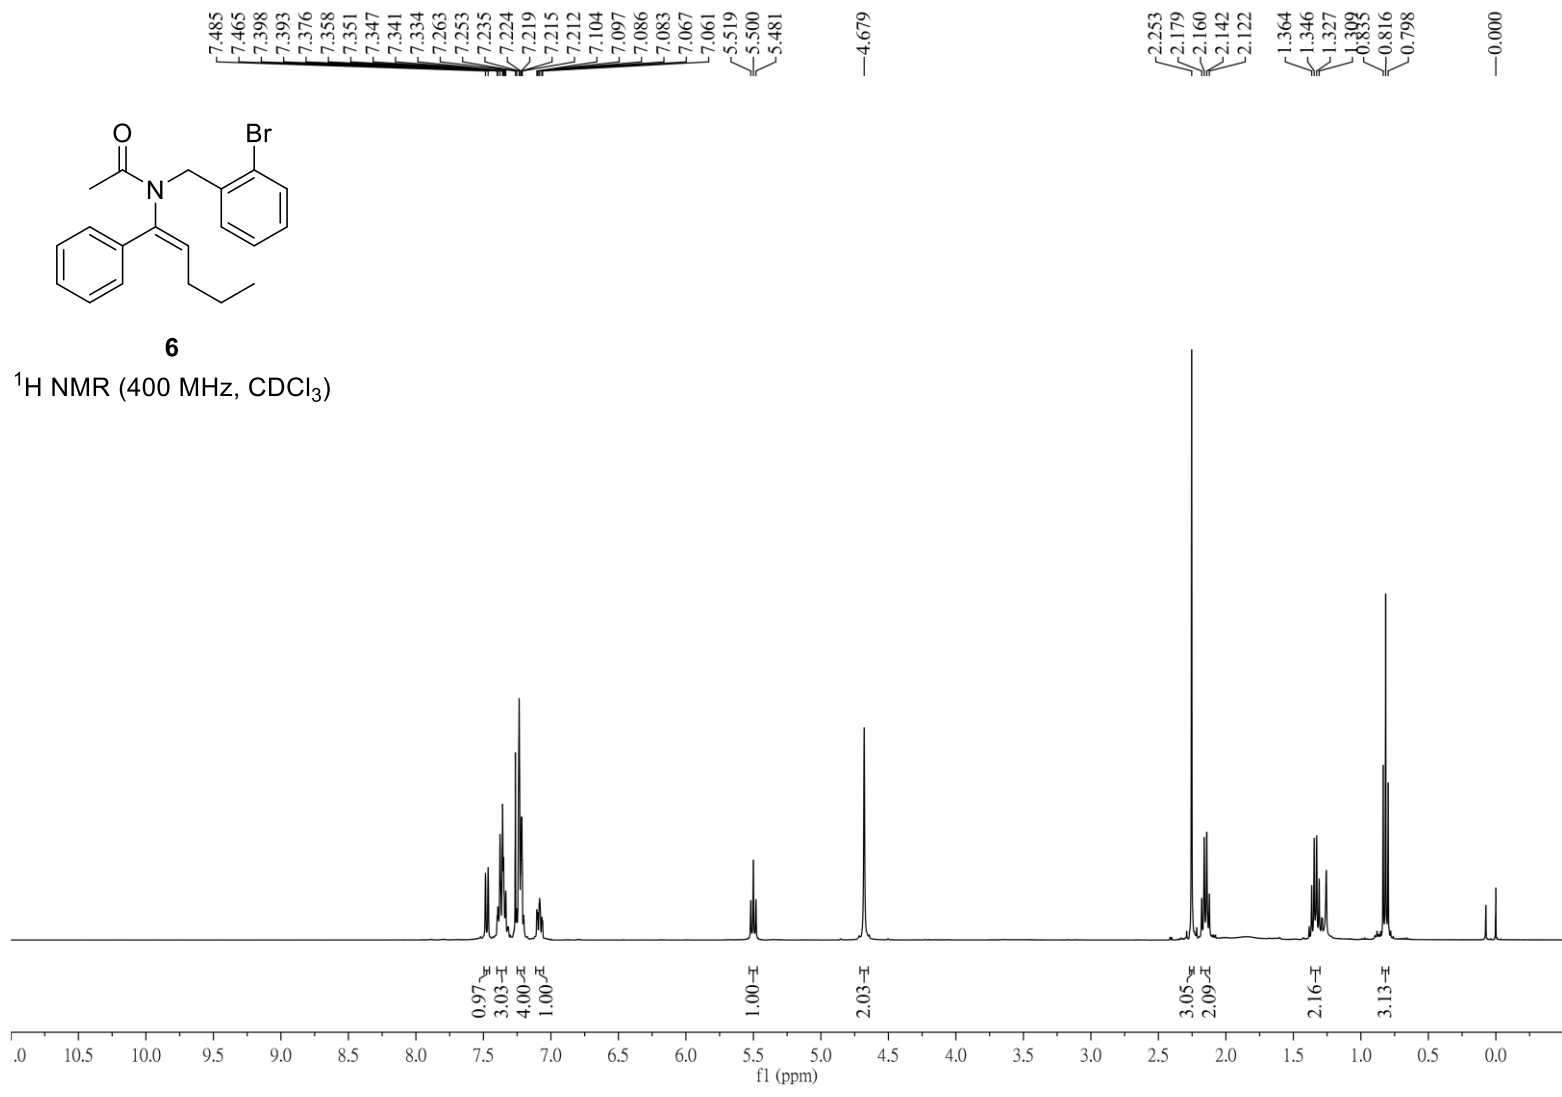



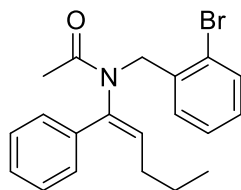

**6**

$^{13}\text{C}$  NMR (100 MHz,  $\text{CDCl}_3$ )

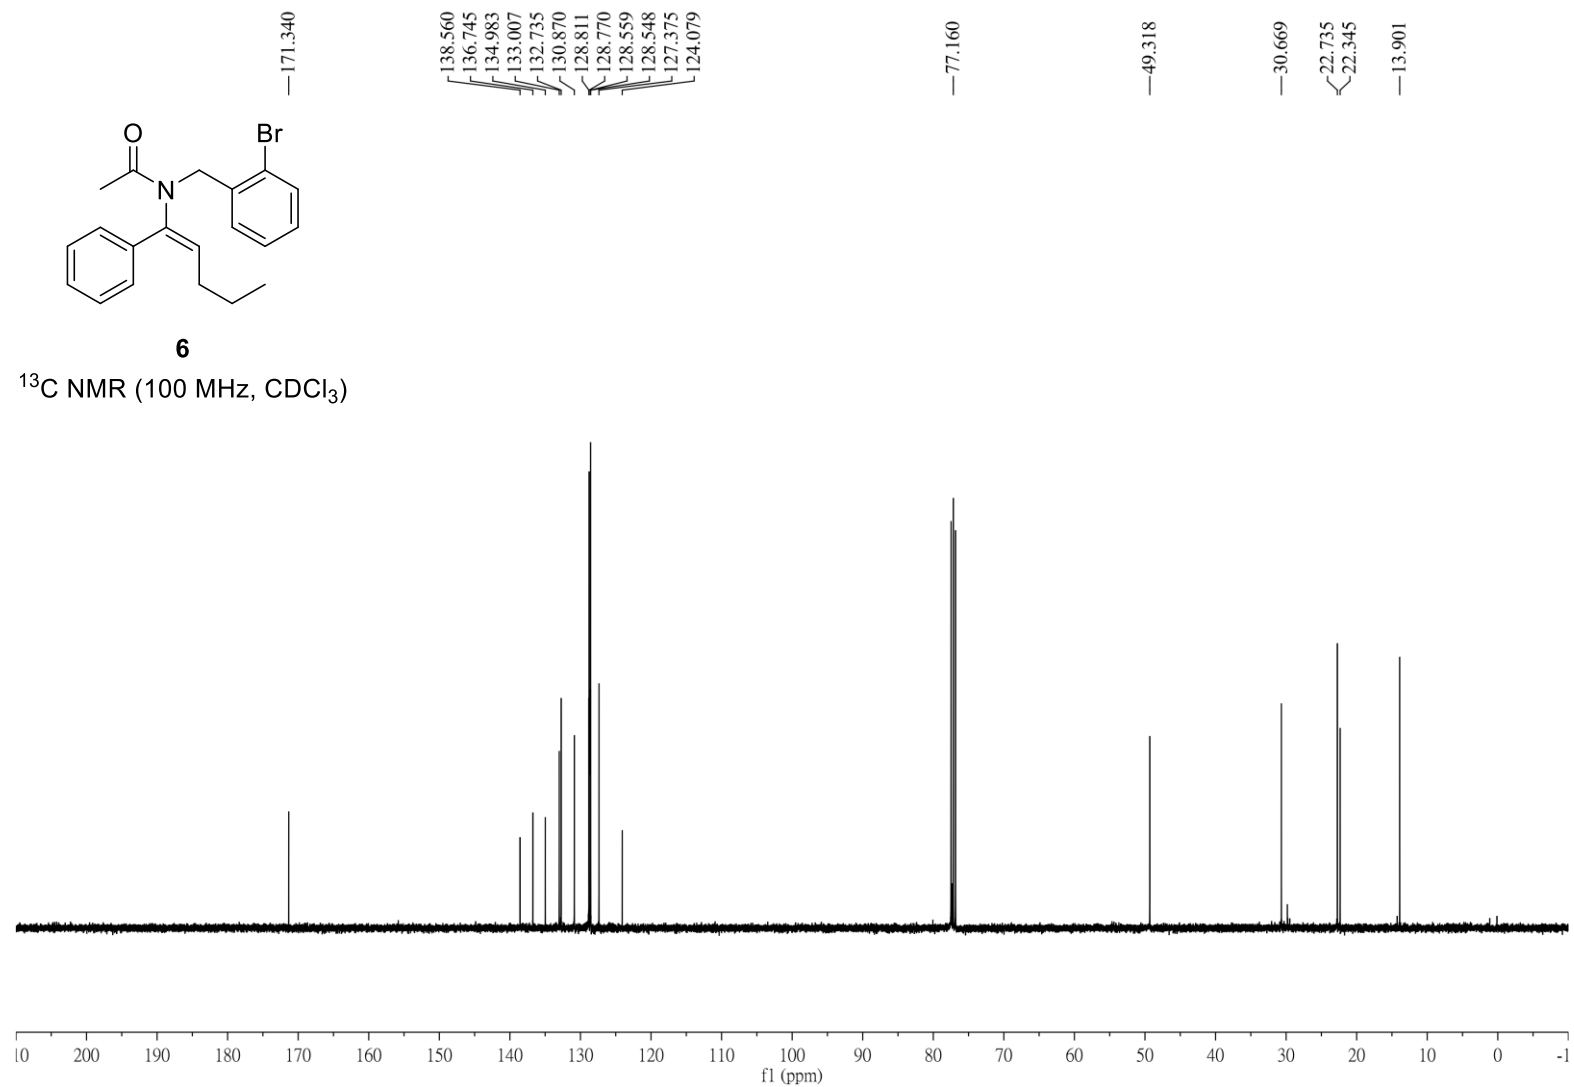

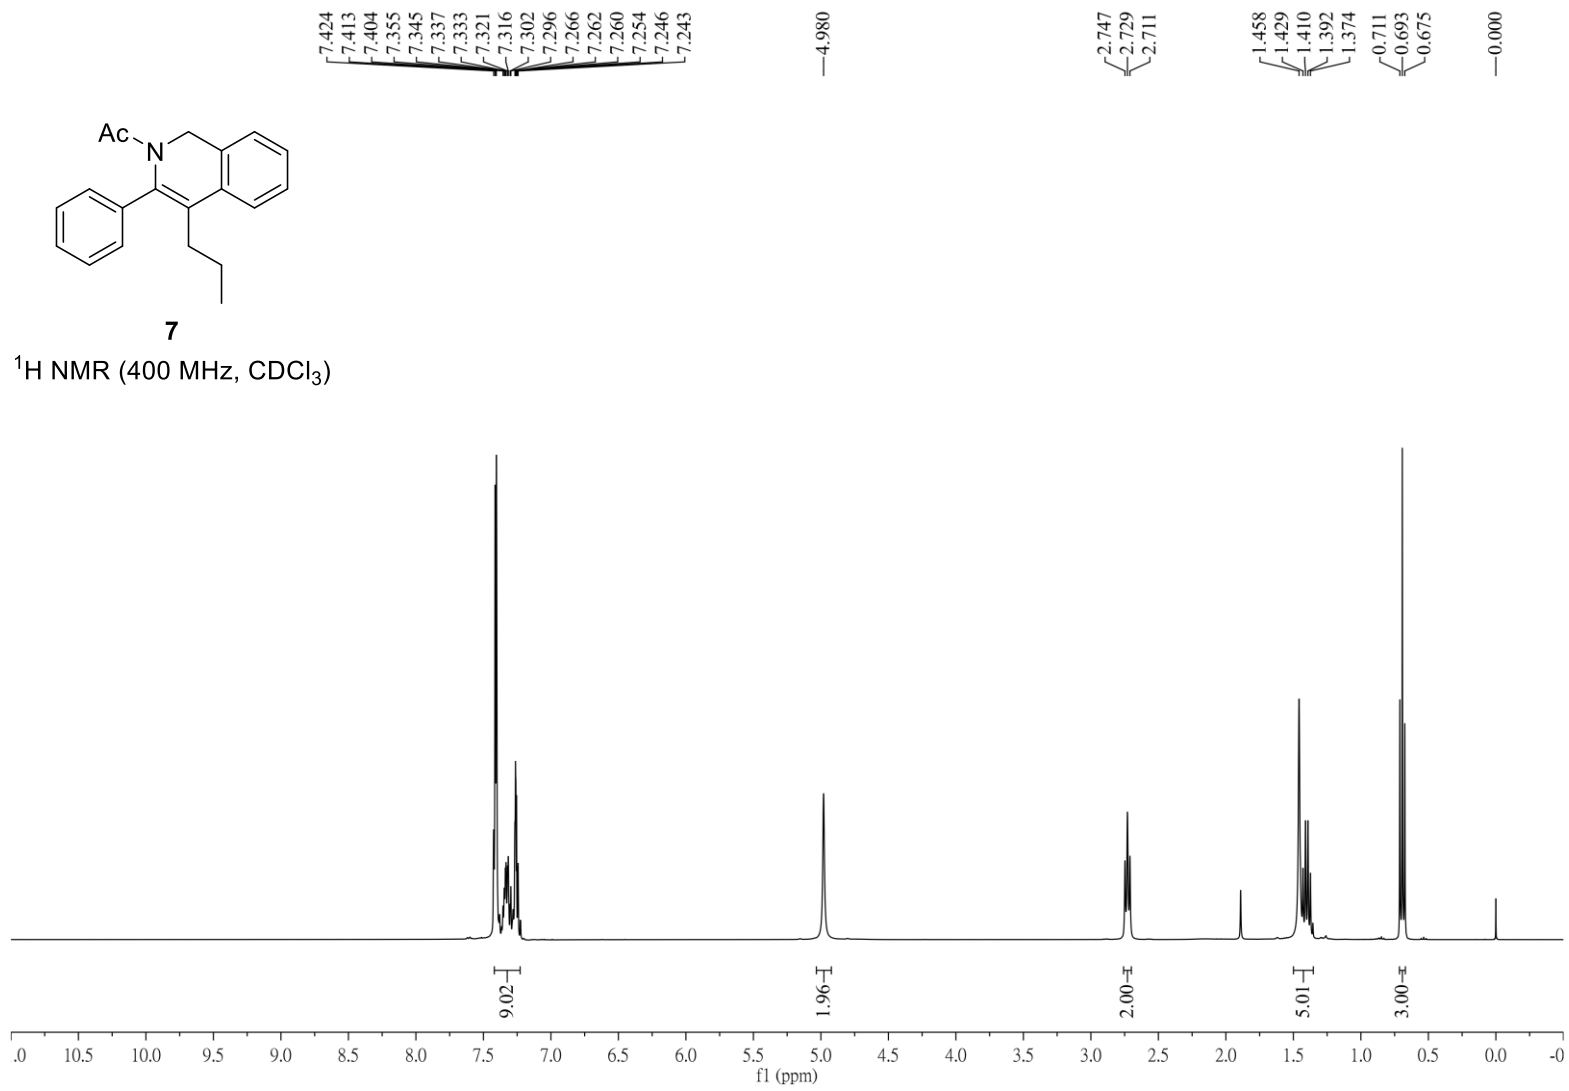

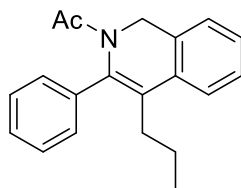

**7**

$^{13}\text{C}$  NMR (100 MHz,  $\text{CDCl}_3$ )

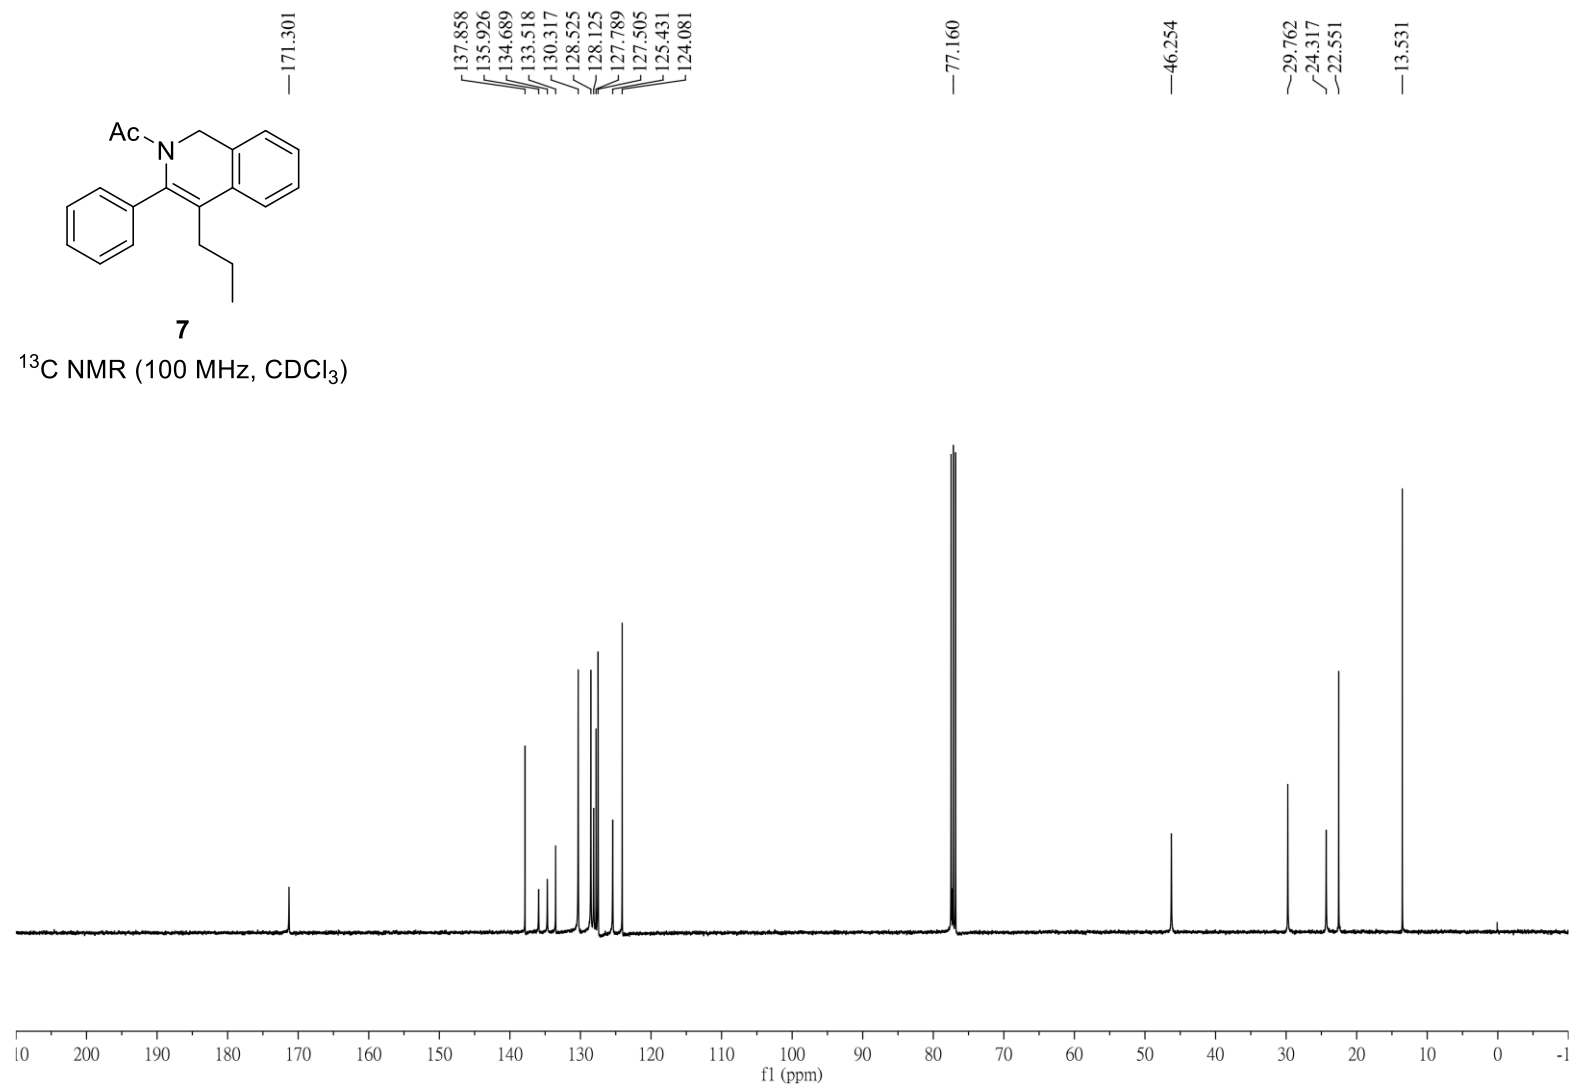

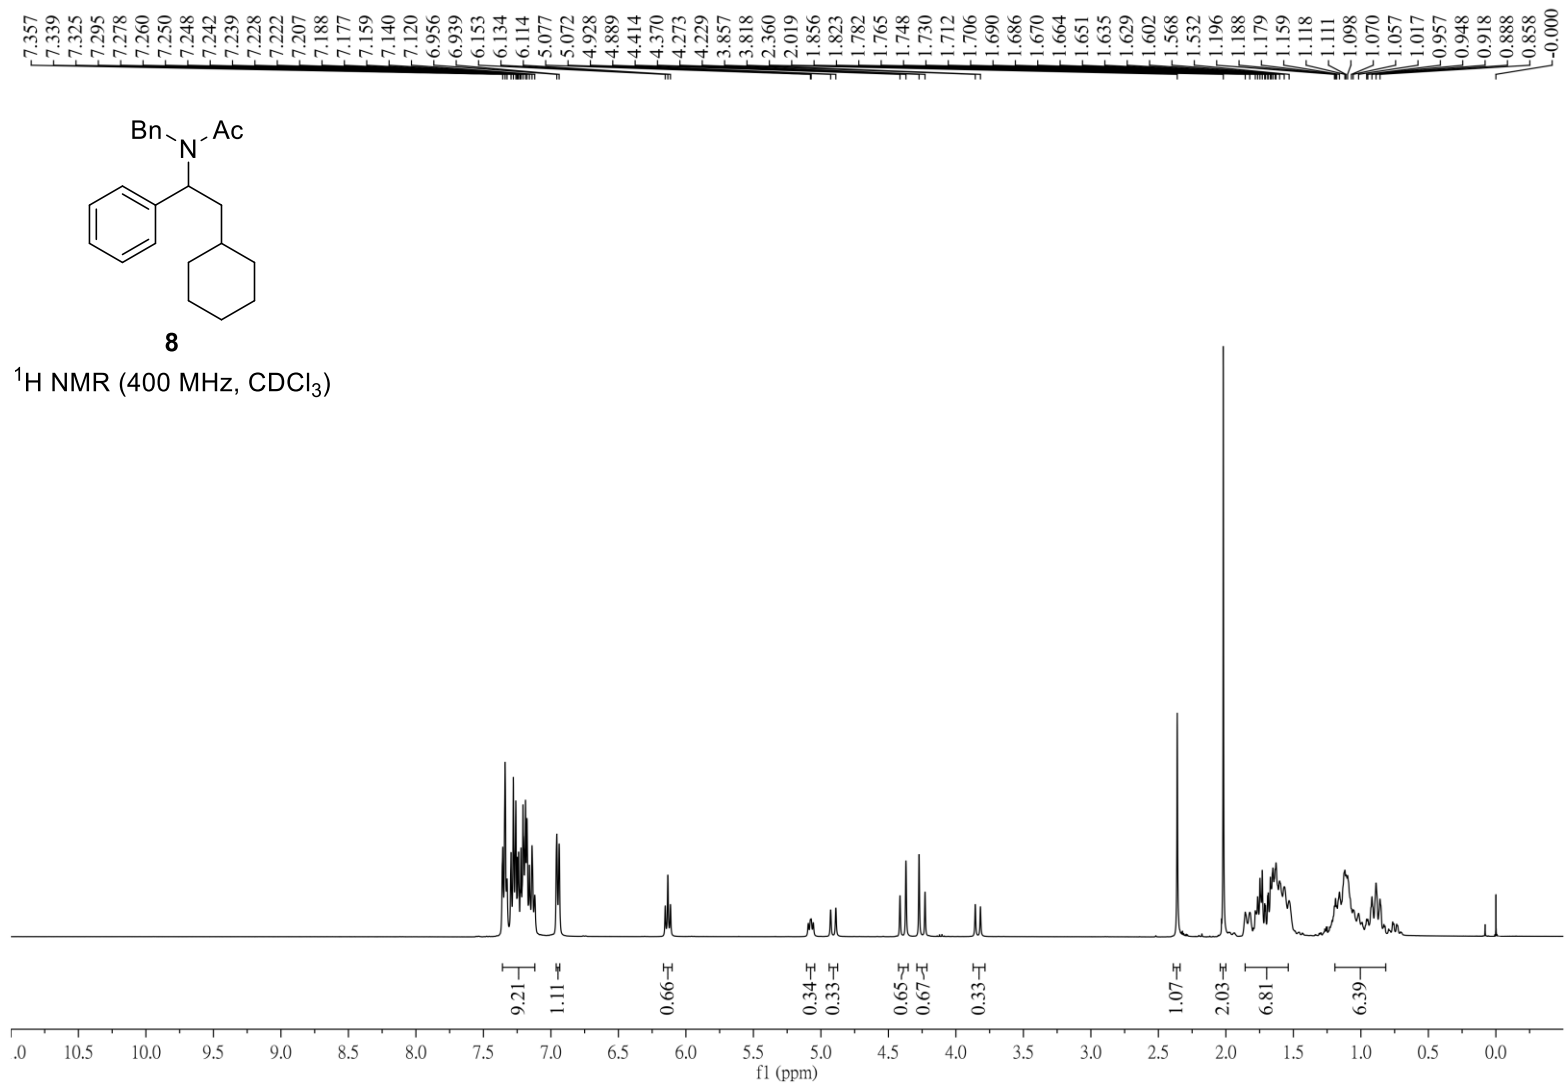

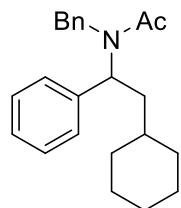

**8**

$^{13}\text{C}$  NMR (100 MHz,  $\text{CDCl}_3$ )

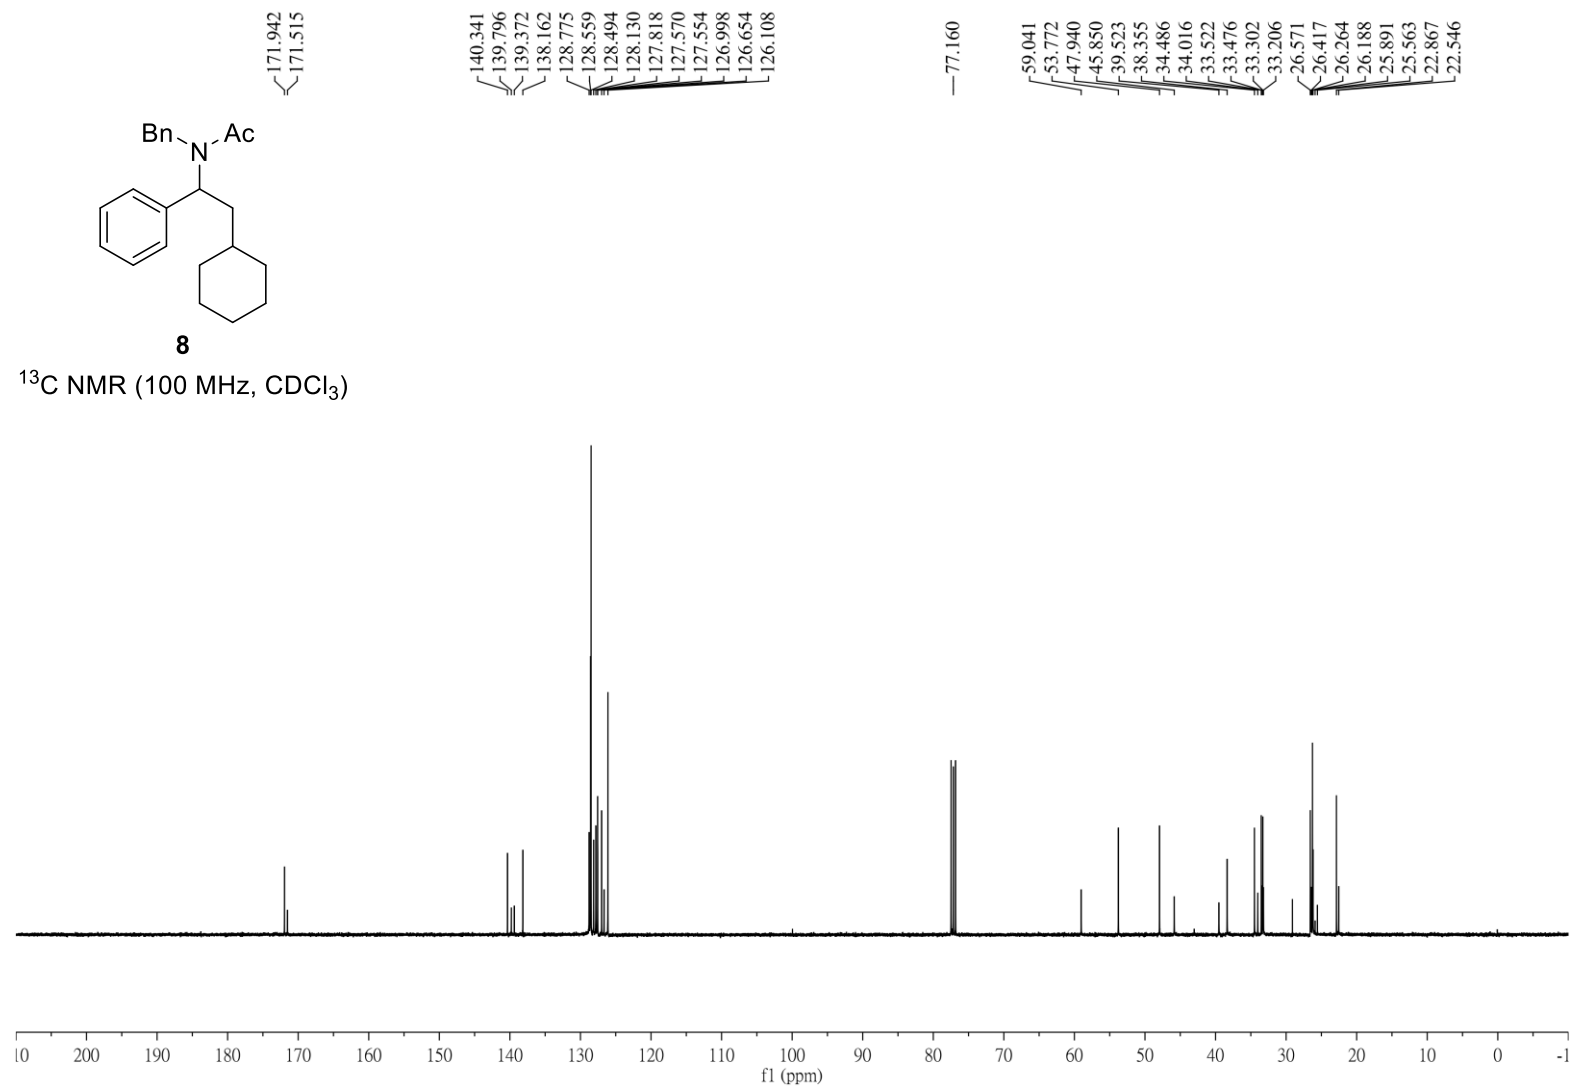

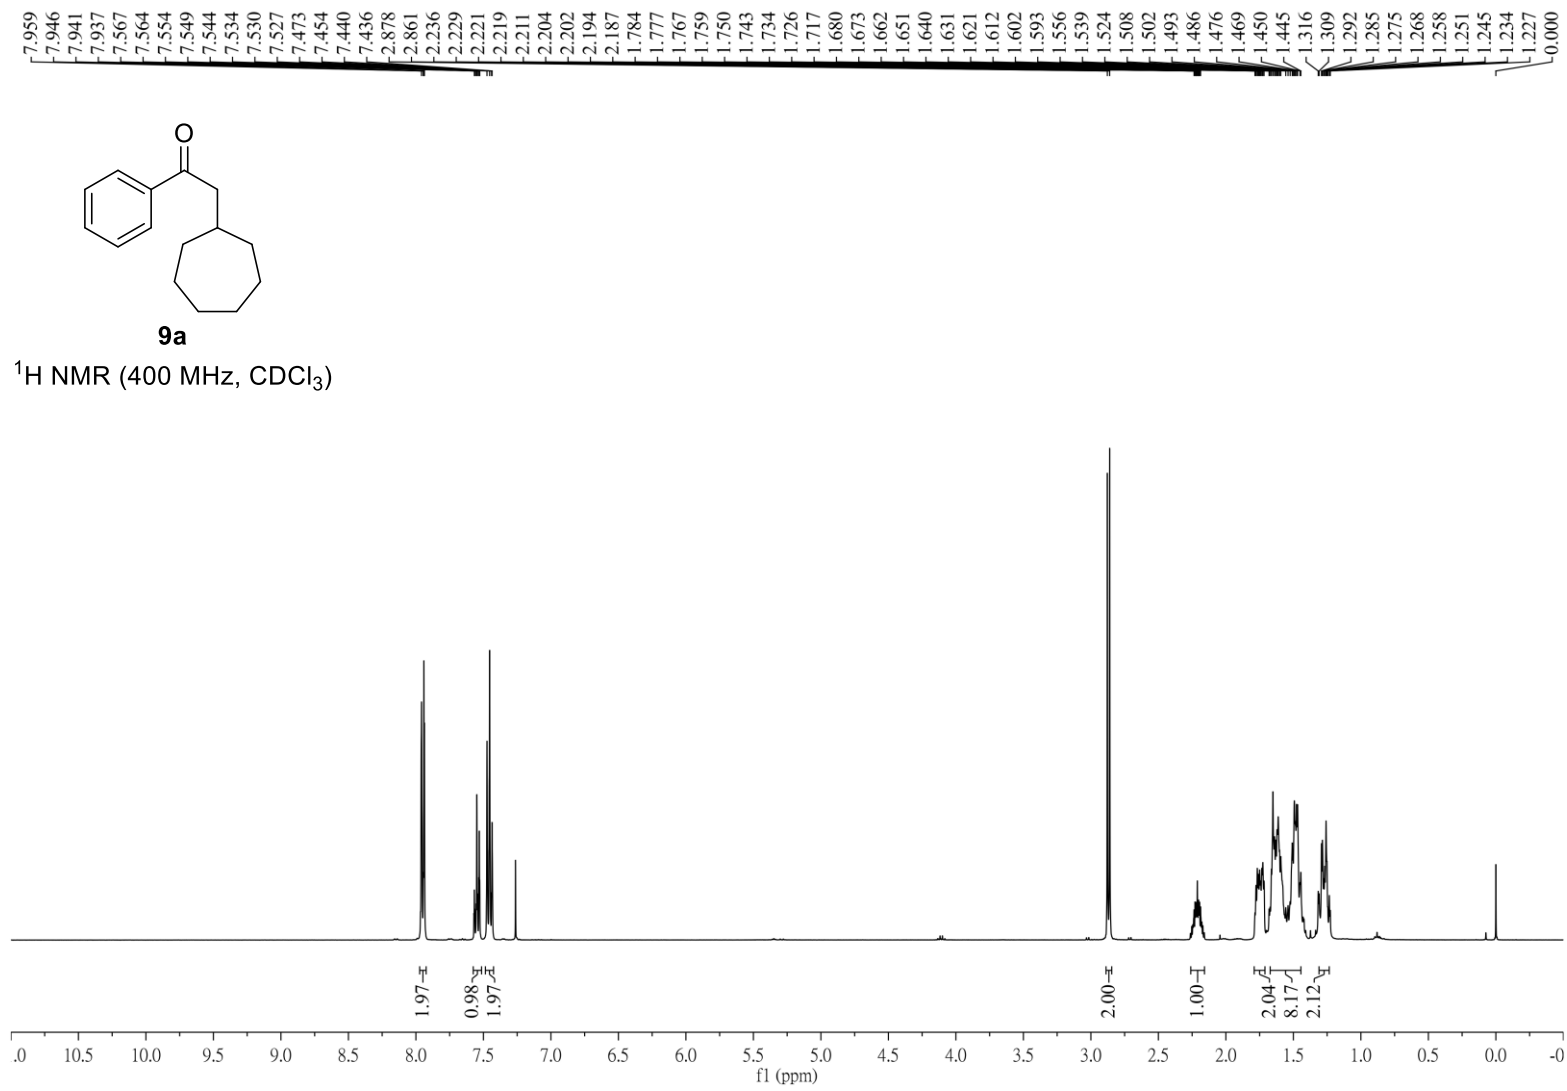

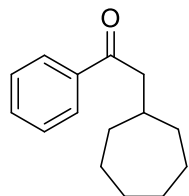

**9a**

$^{13}\text{C}$  NMR (100 MHz,  $\text{CDCl}_3$ )

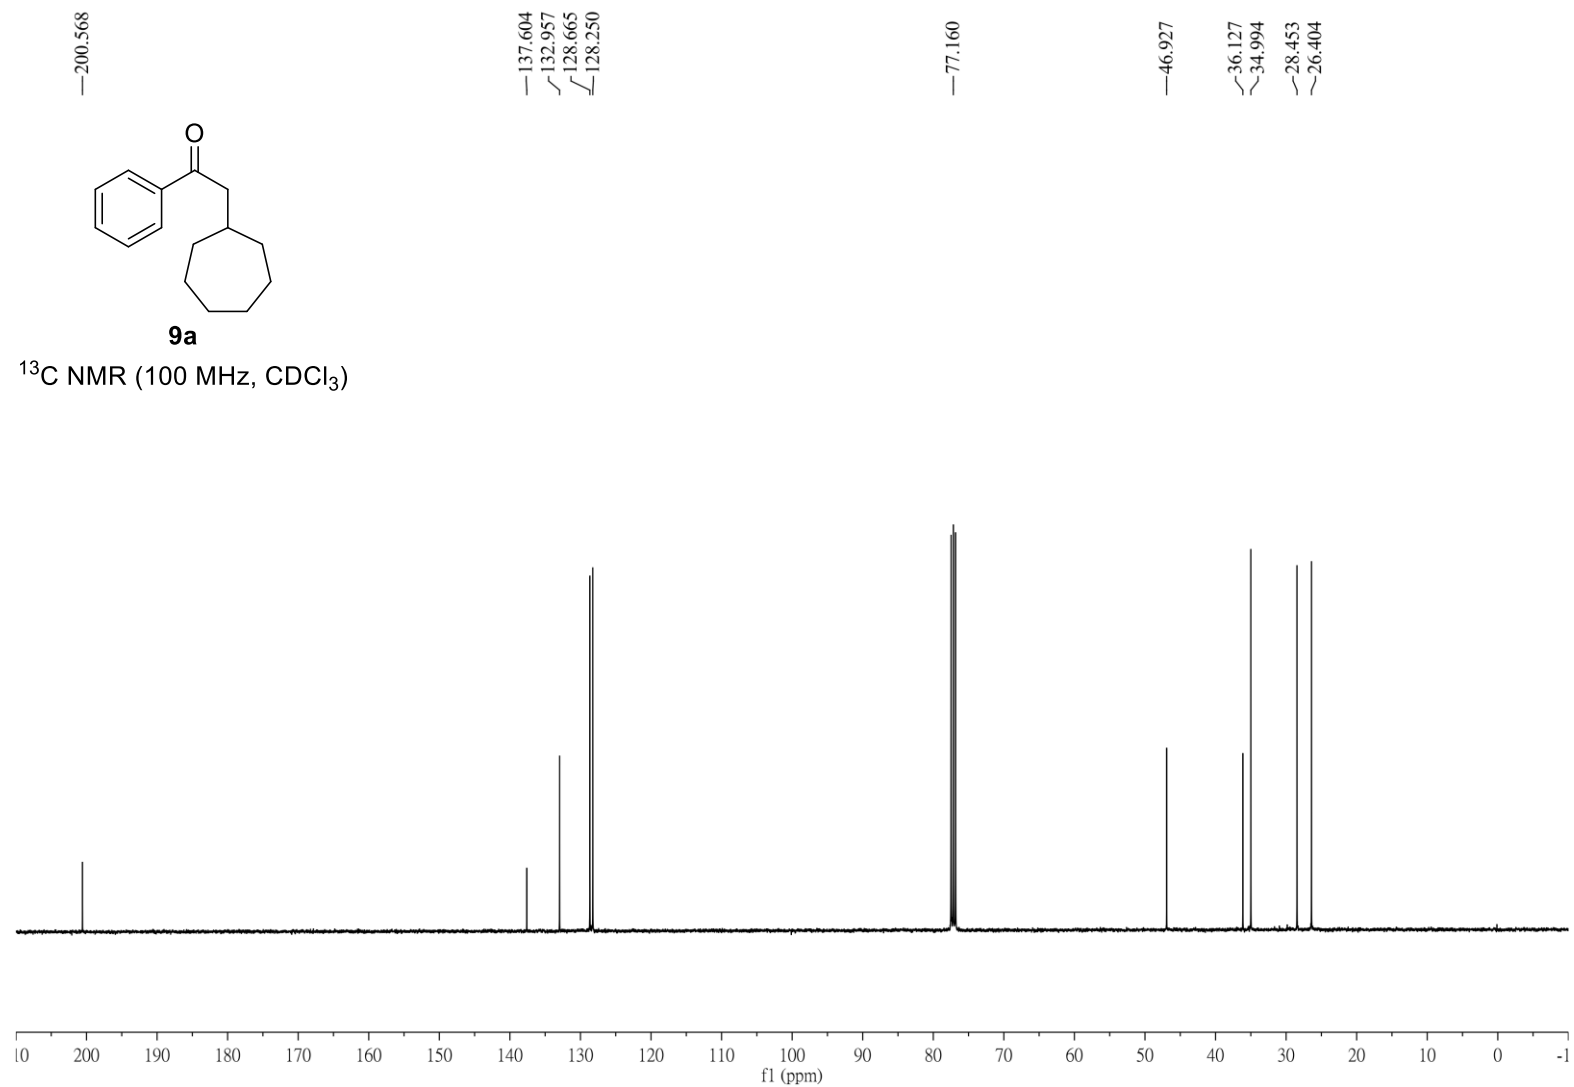

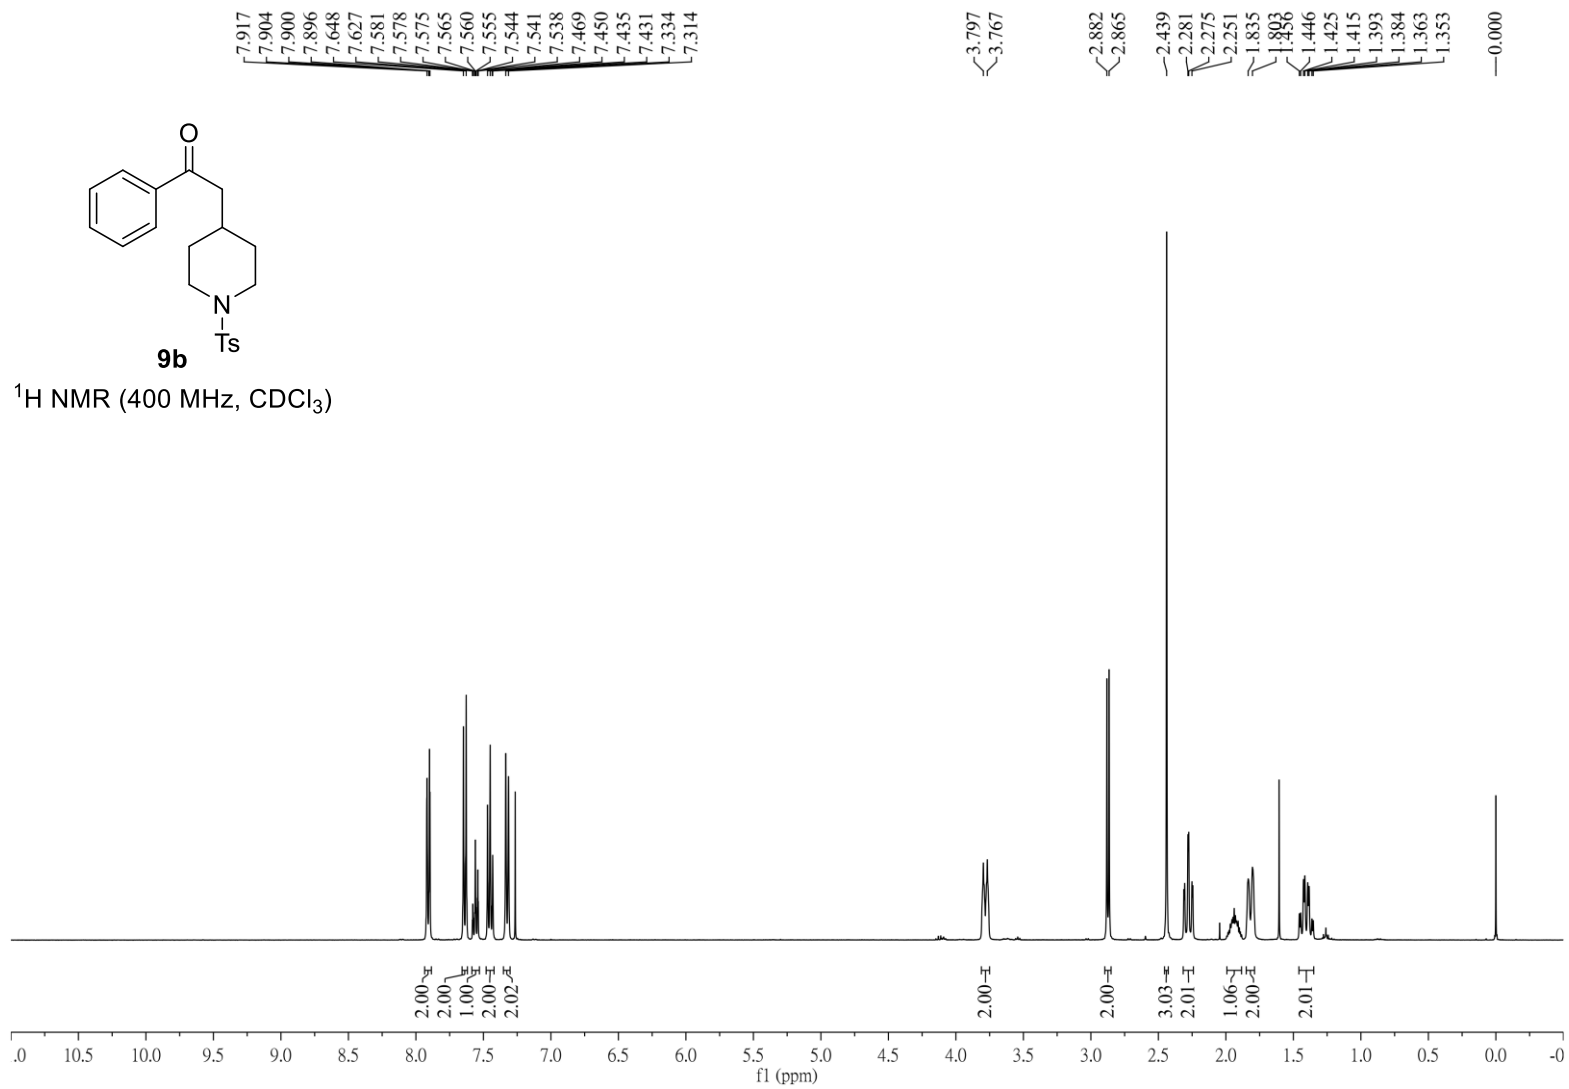



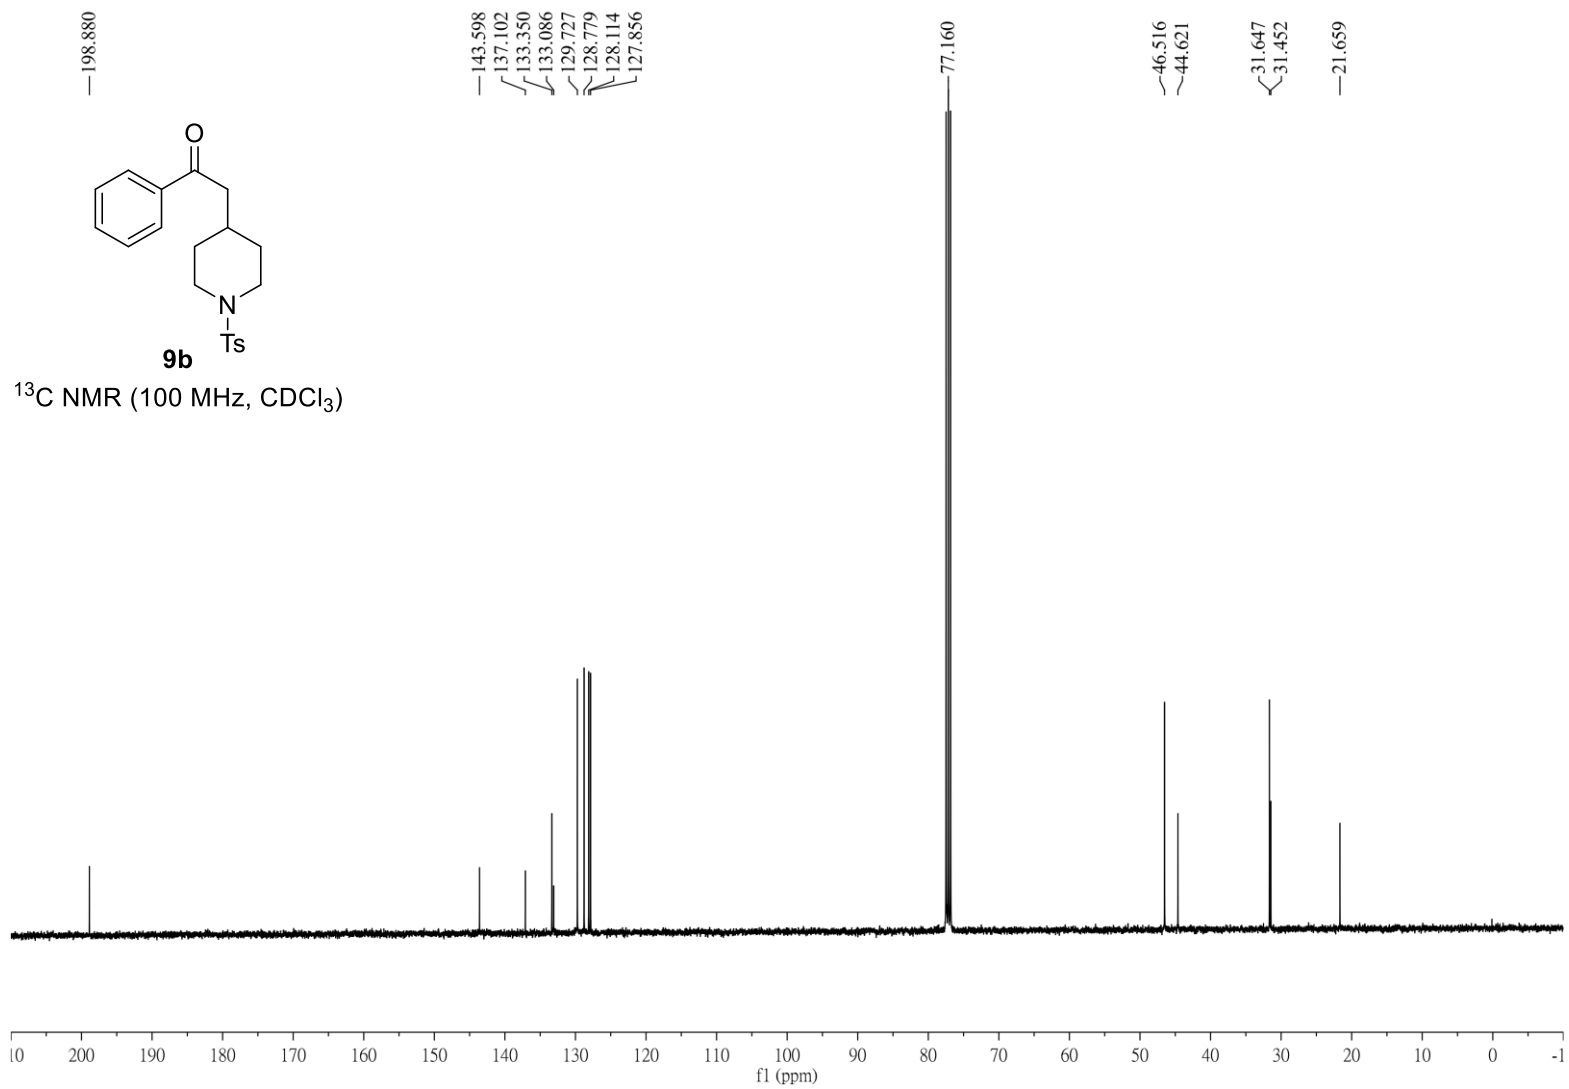

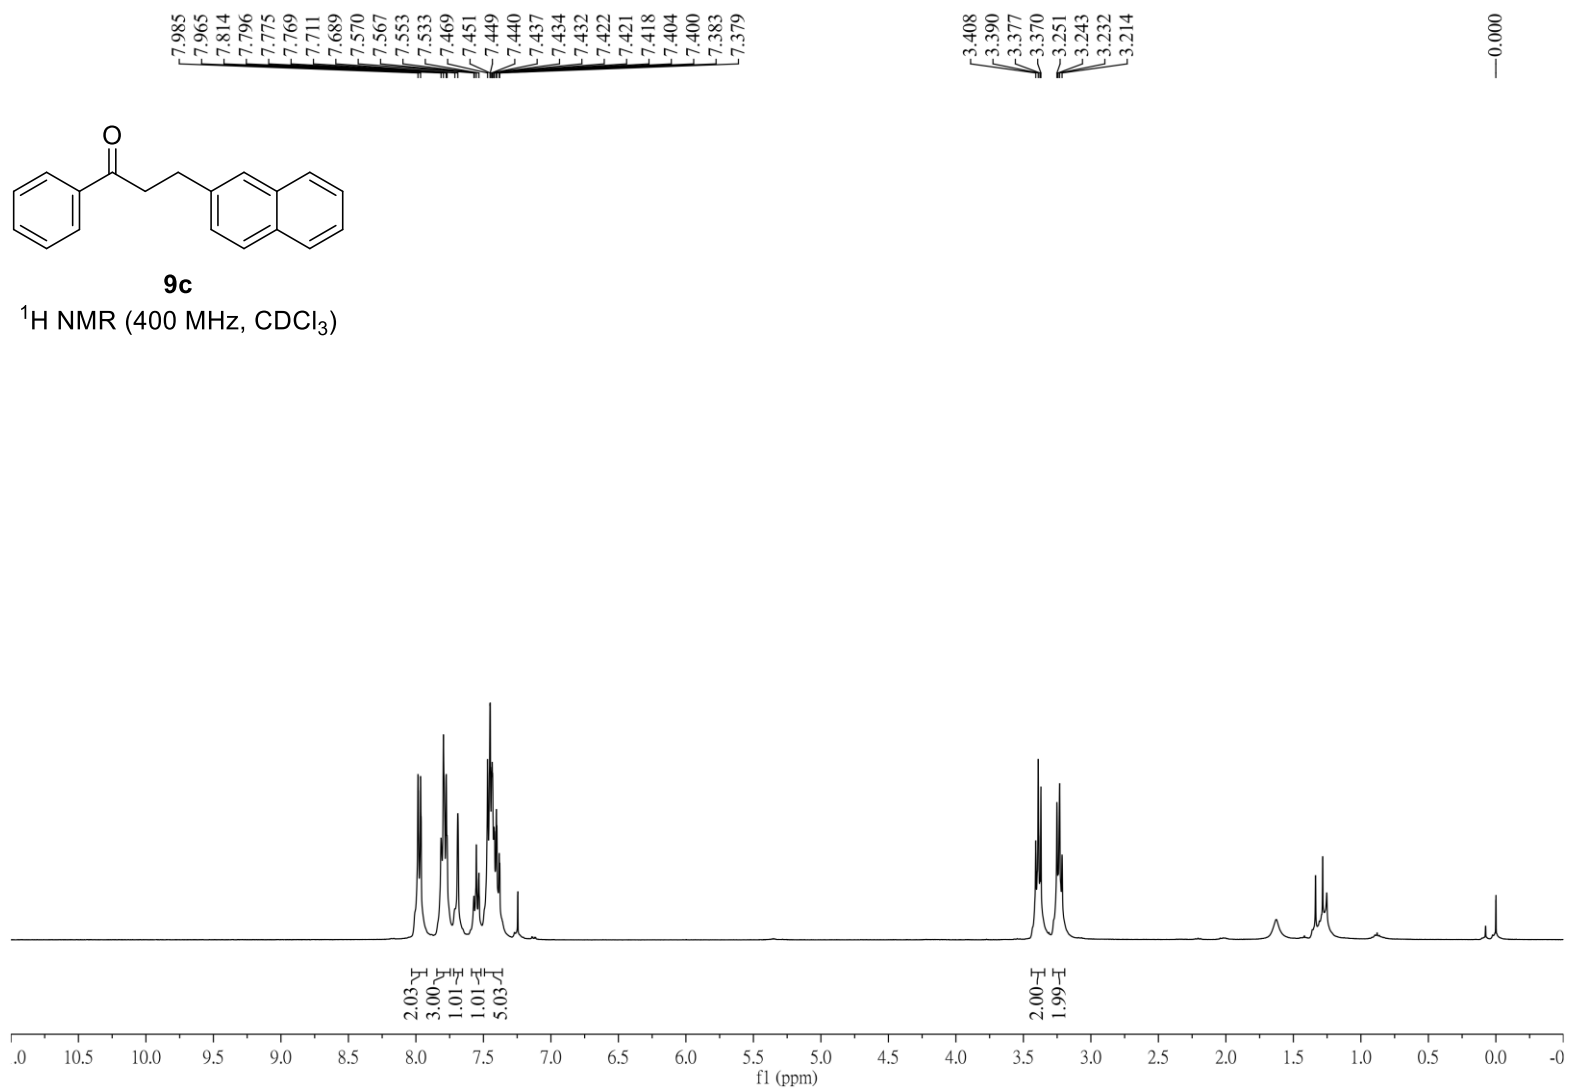

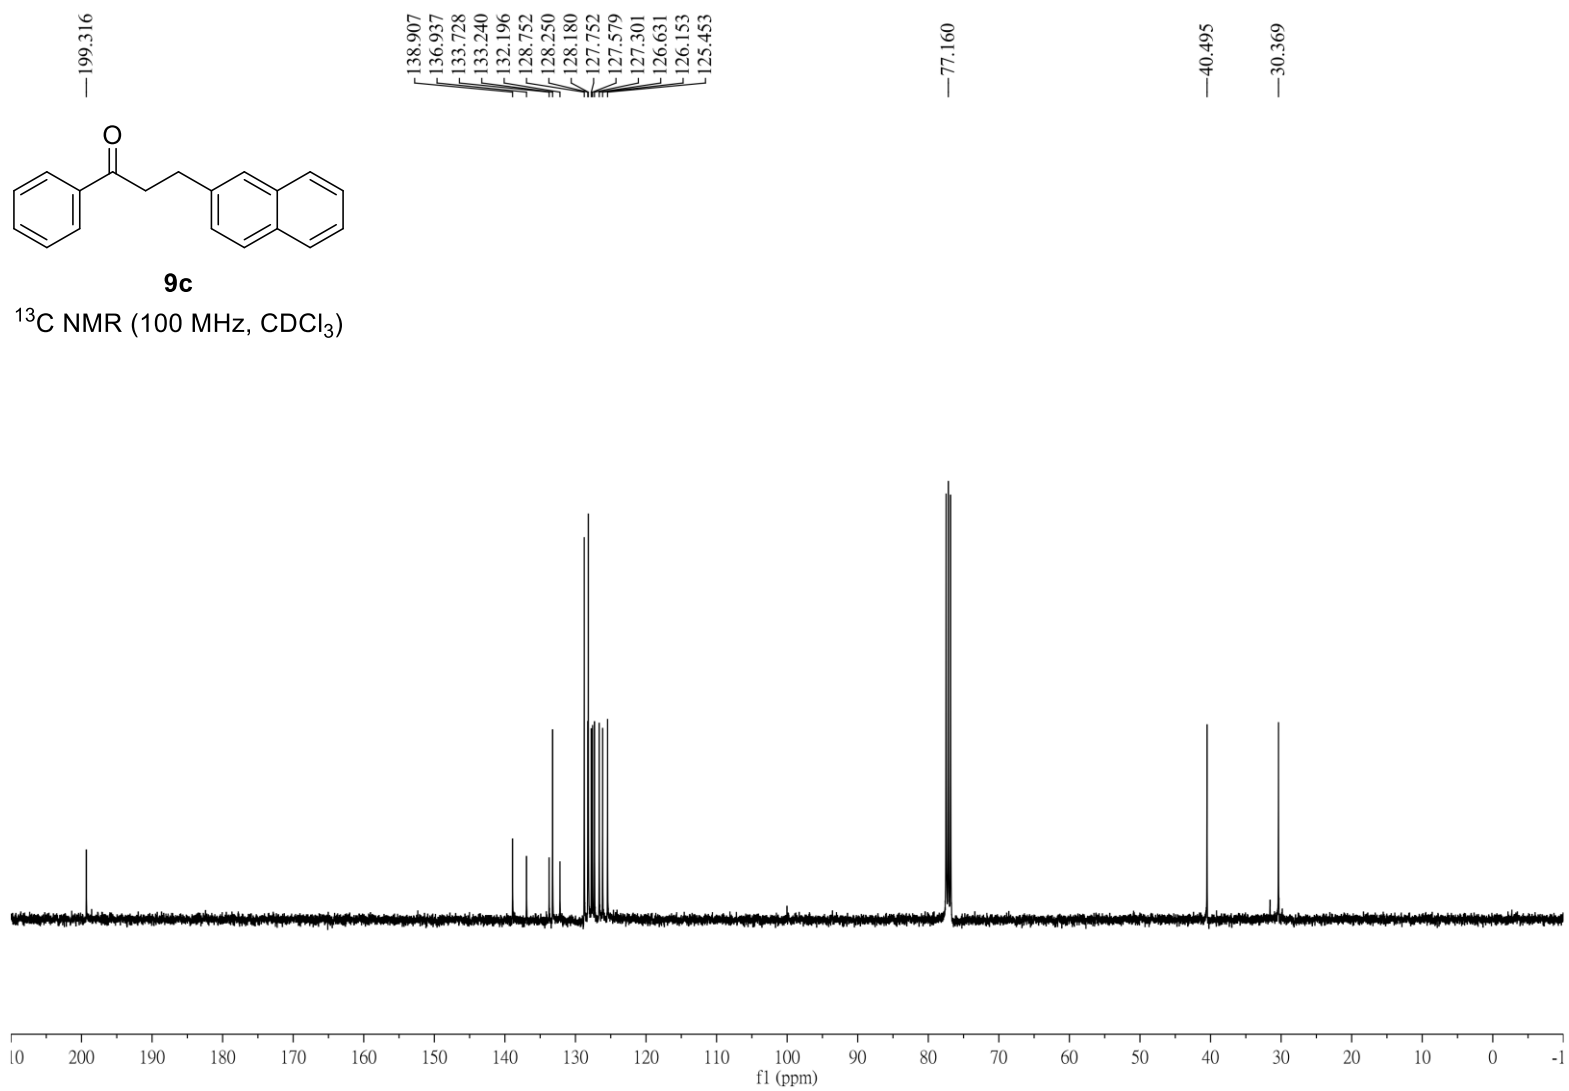

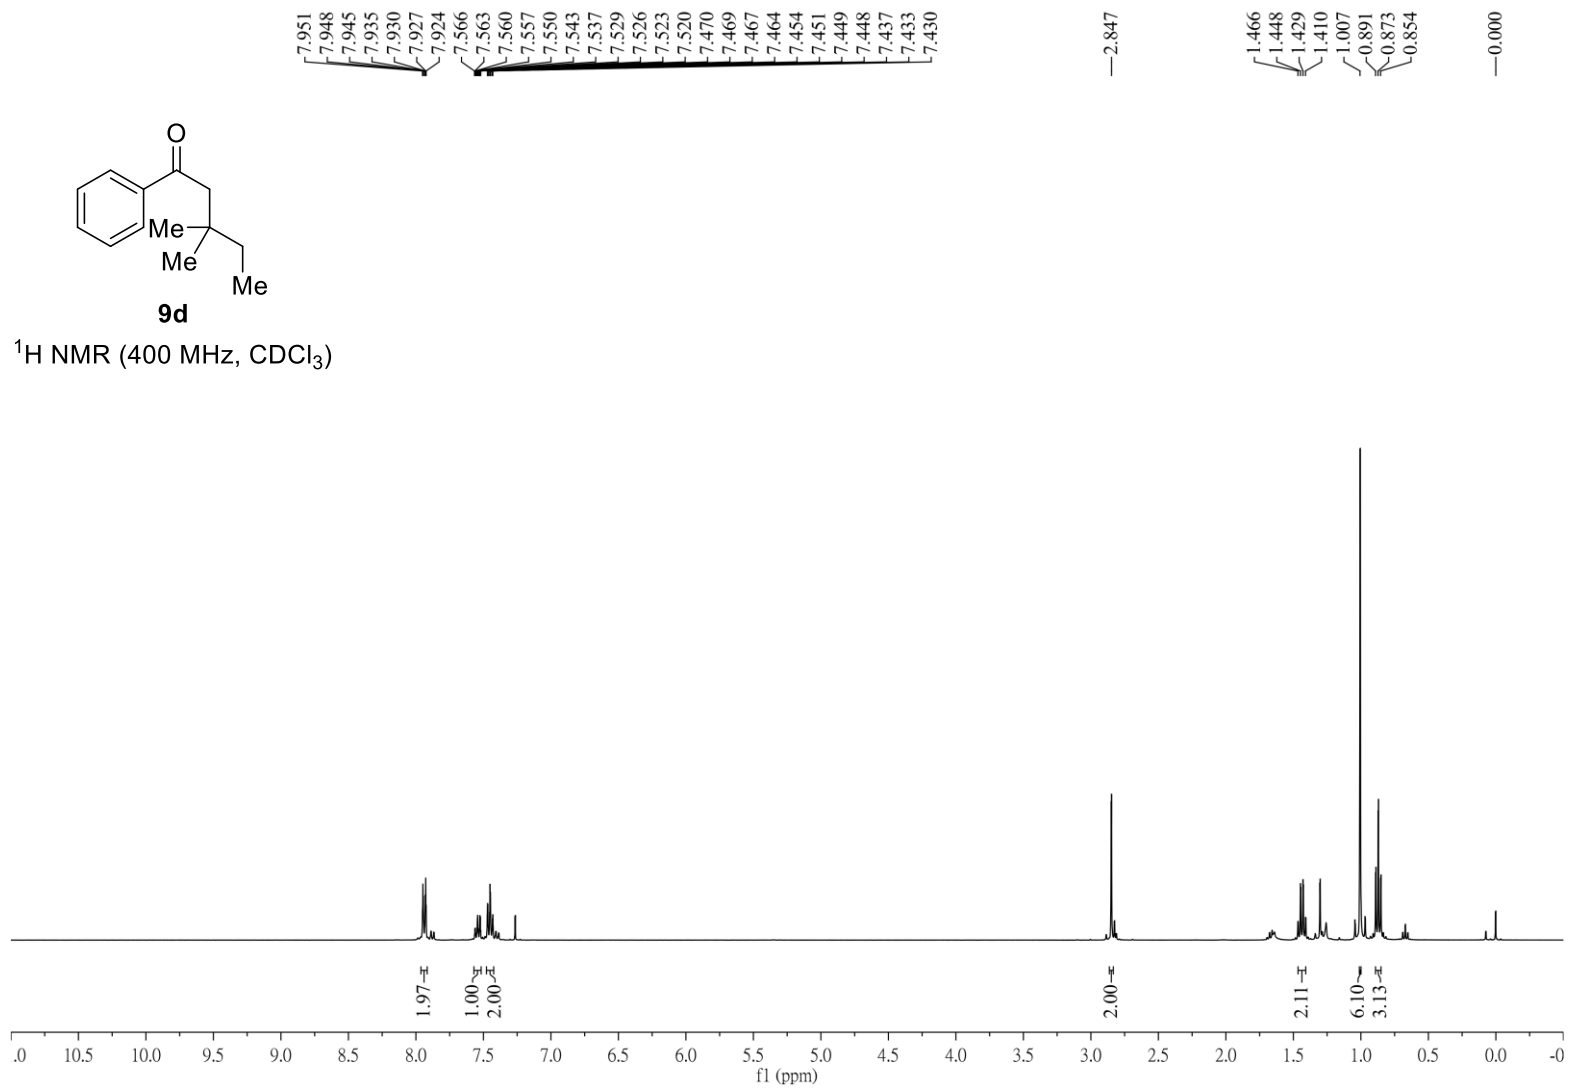

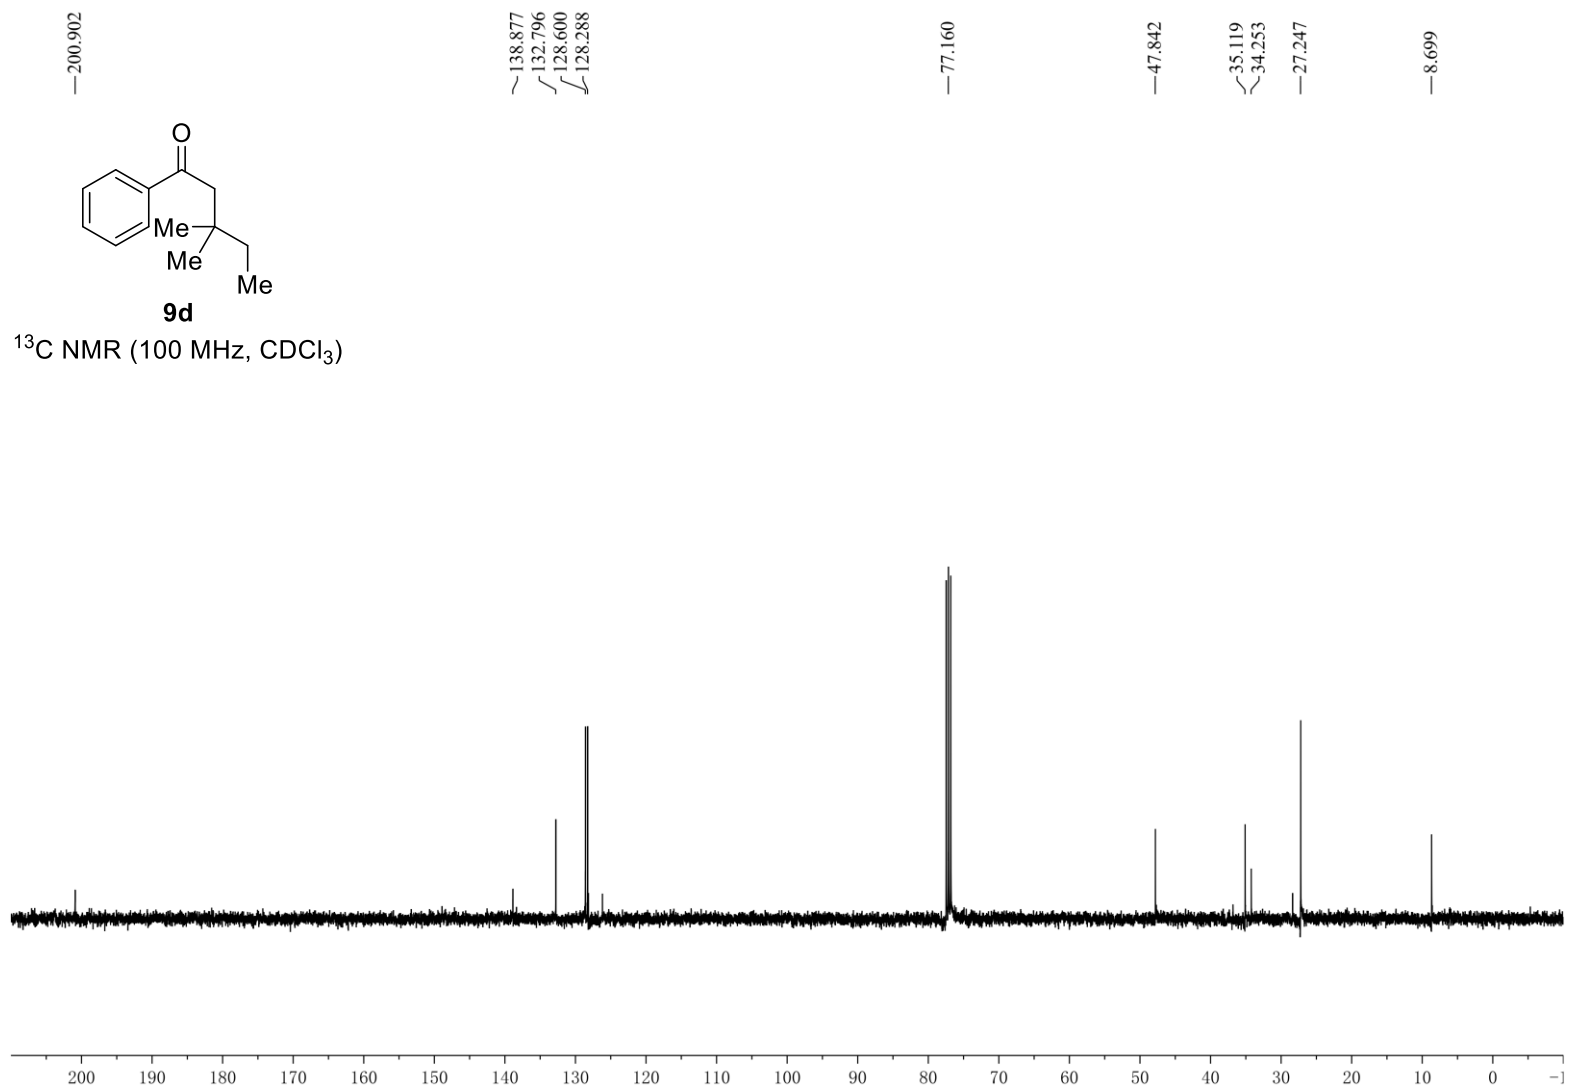

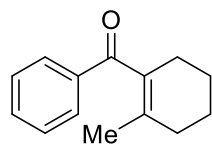

**9e**

$^1\text{H}$  NMR (400 MHz,  $\text{CDCl}_3$ )

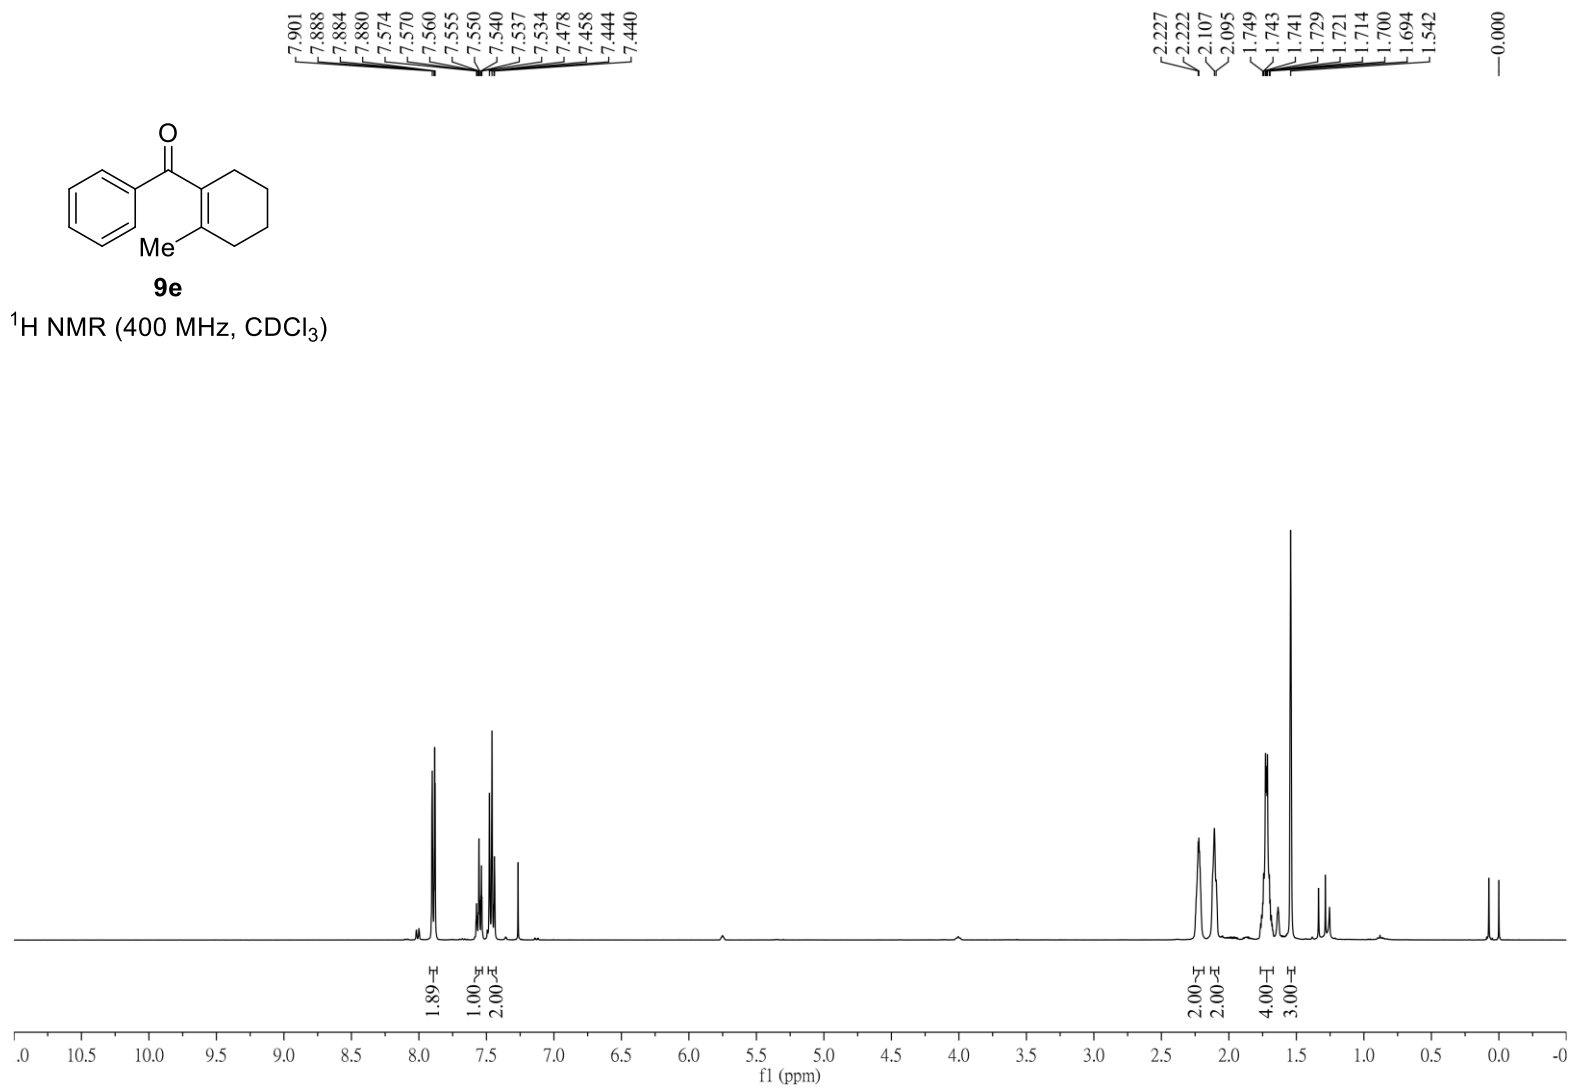

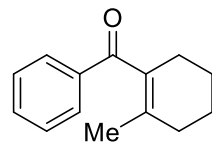

**9e**

$^{13}\text{C}$  NMR (100 MHz,  $\text{CDCl}_3$ )

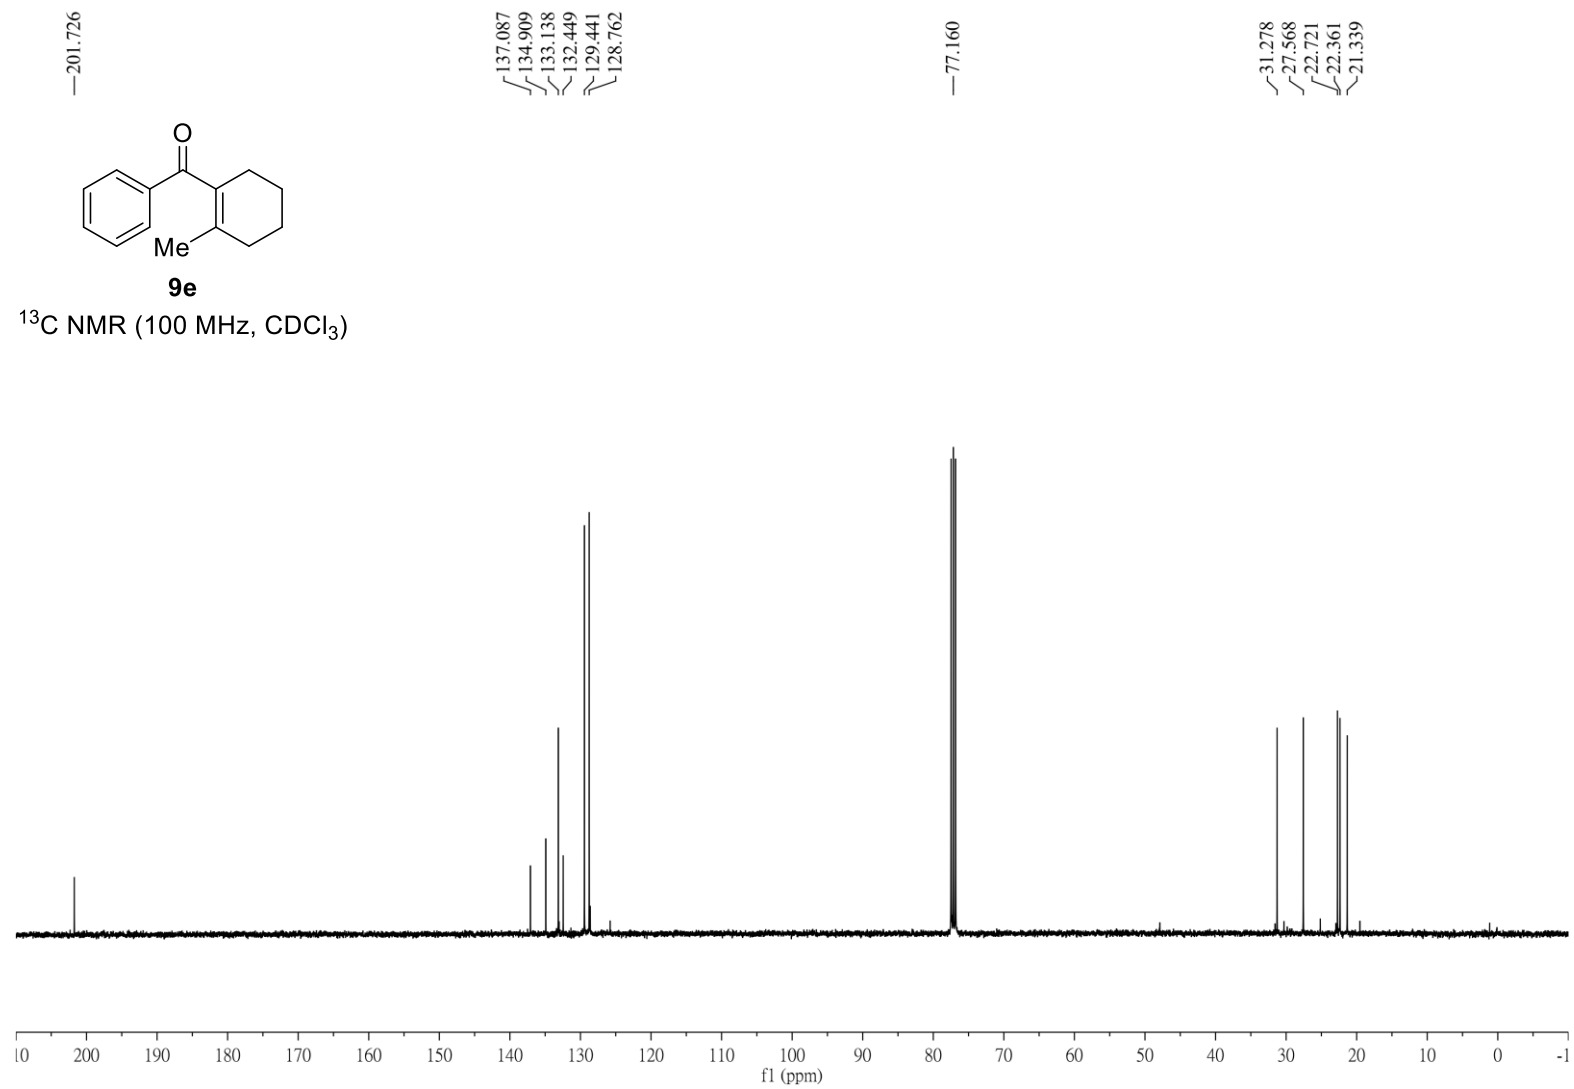

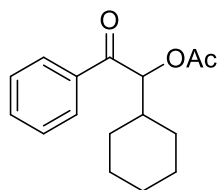

**10**

$^1\text{H}$  NMR (400 MHz,  $\text{CDCl}_3$ )

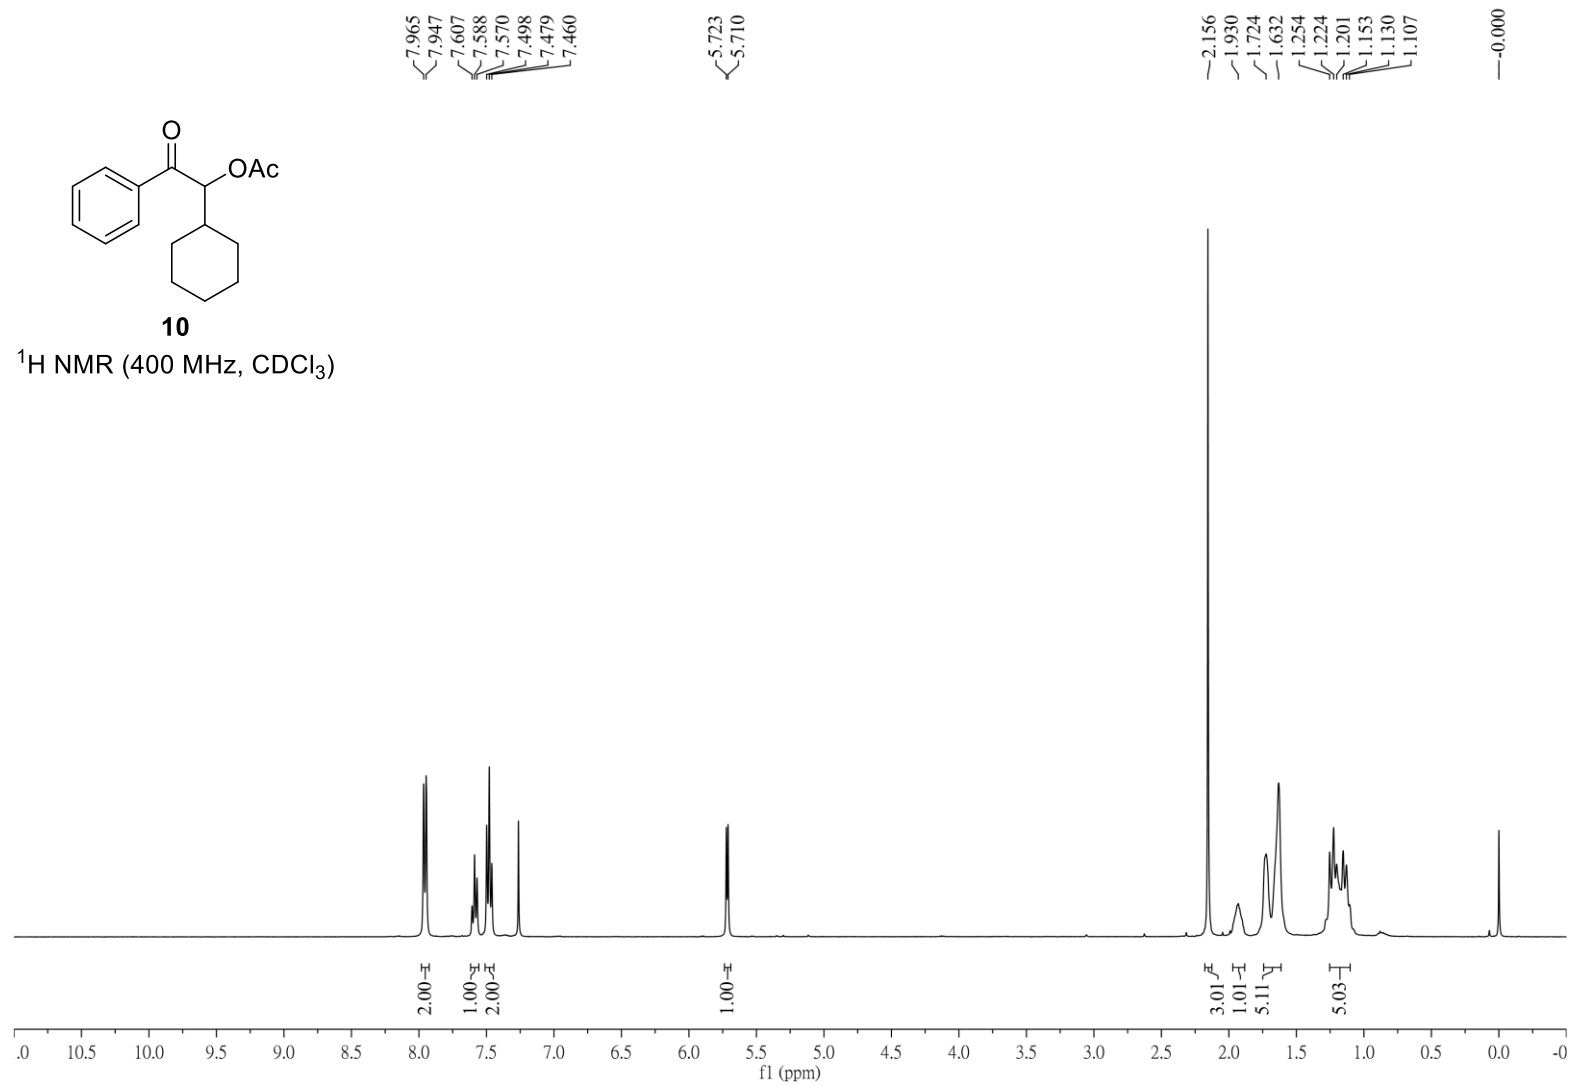



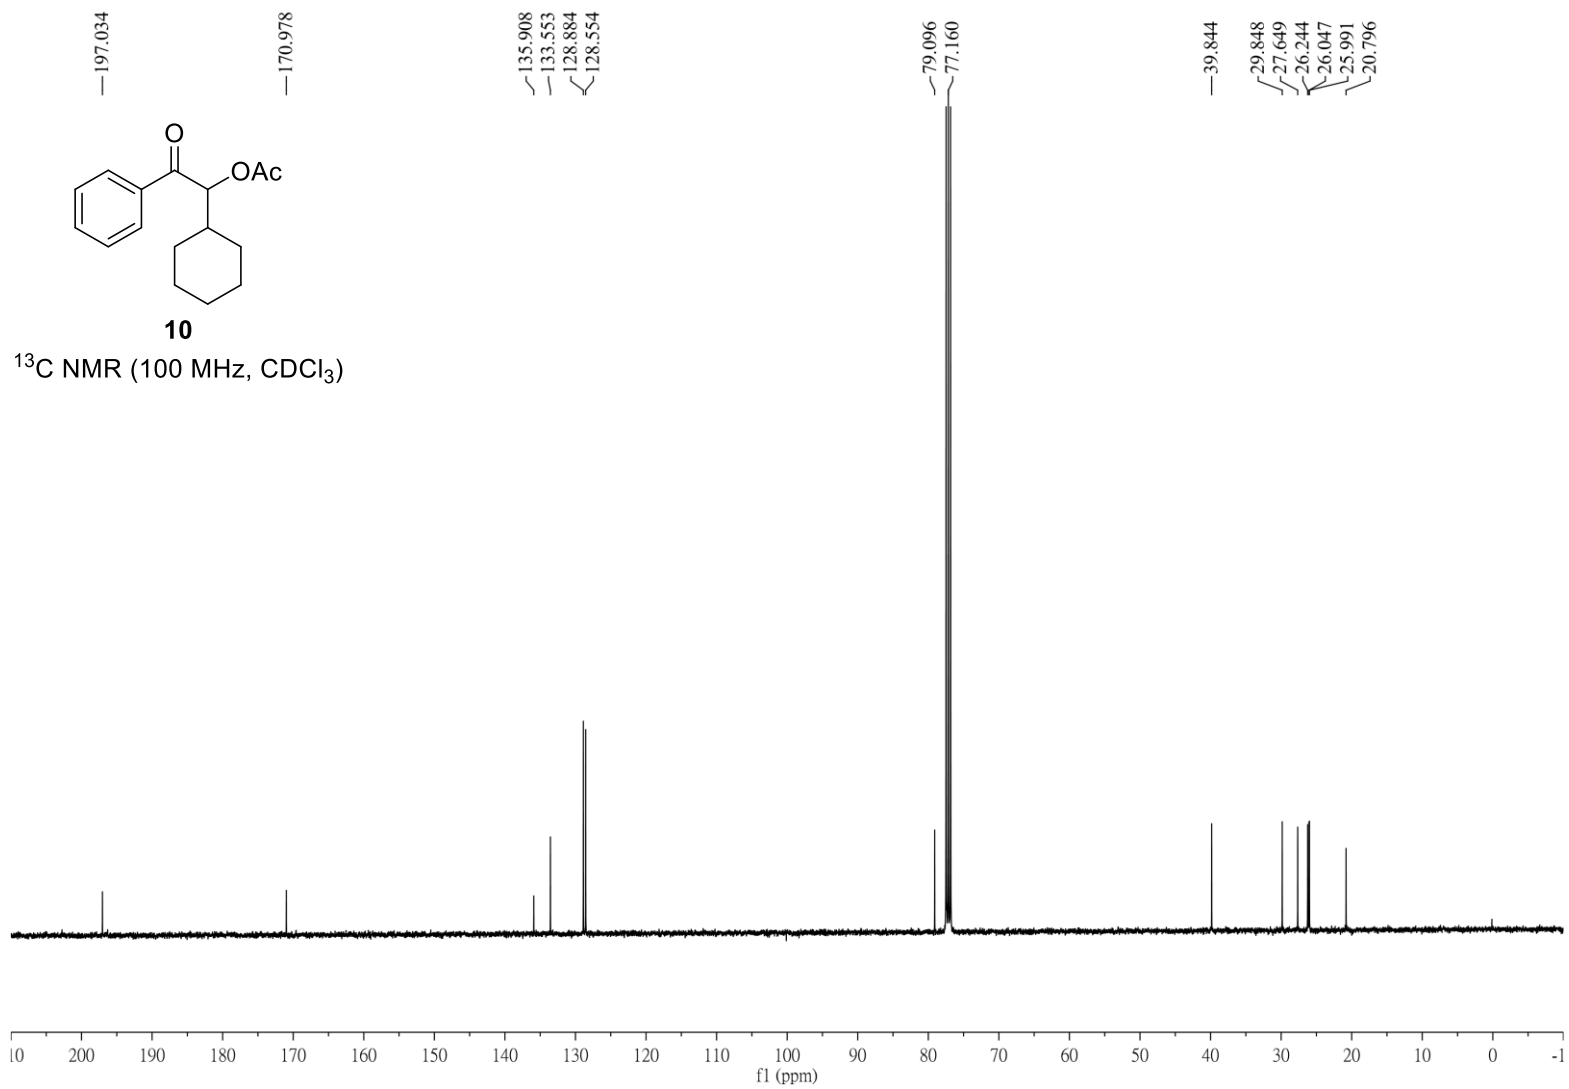

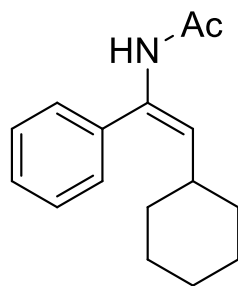

**11**

$^1\text{H}$  NMR (400 MHz,  $\text{CDCl}_3$ )

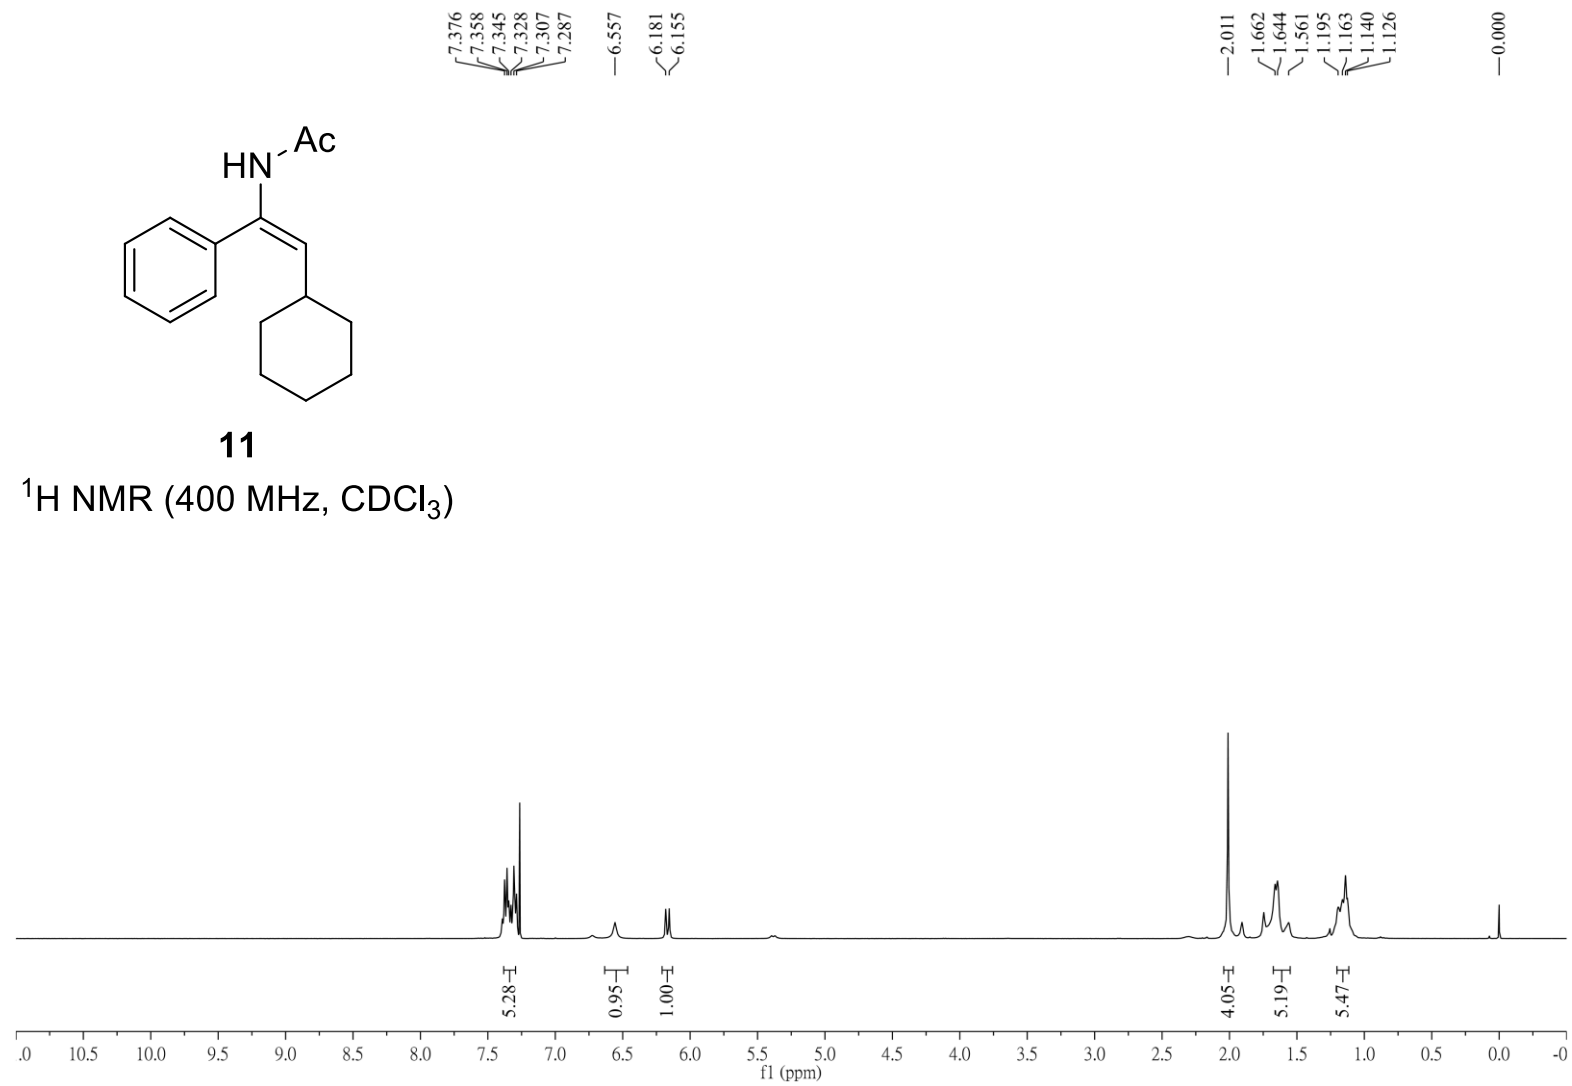

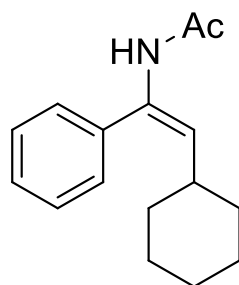

**11**

$^{13}\text{C}$  NMR (100 MHz,  $\text{CDCl}_3$ )

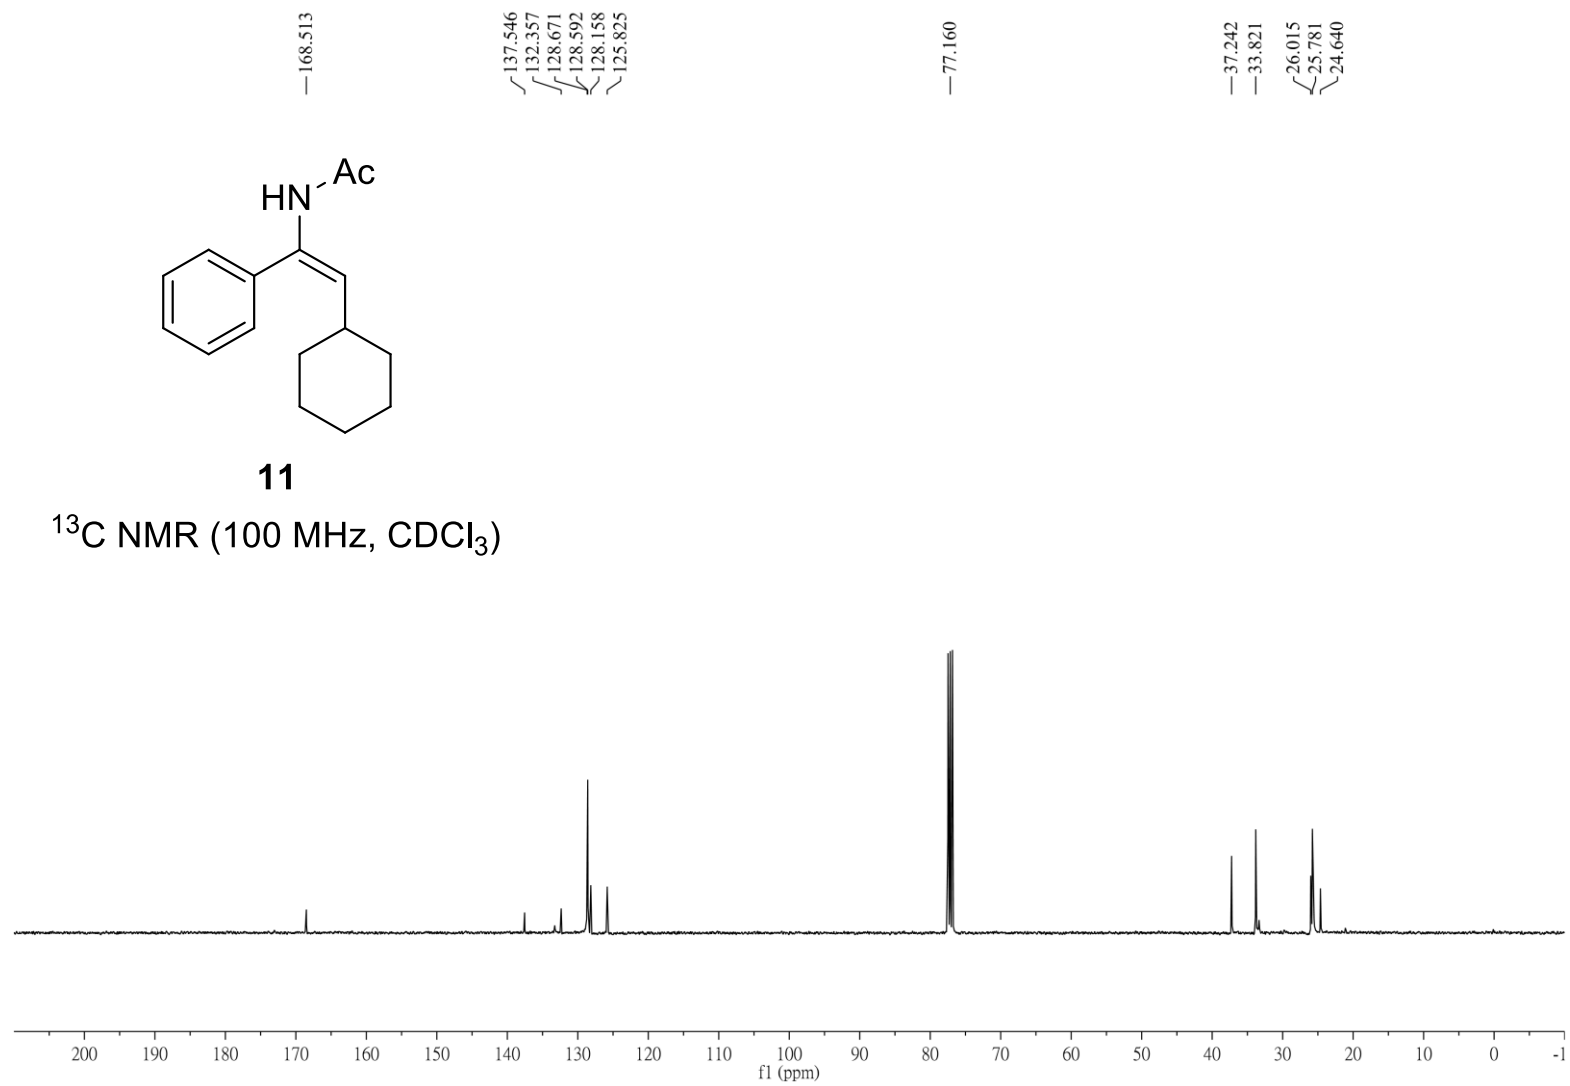

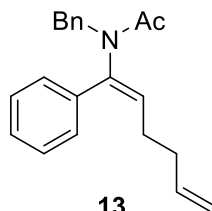

$^1\text{H}$  NMR (400 MHz,  $\text{CDCl}_3$ )

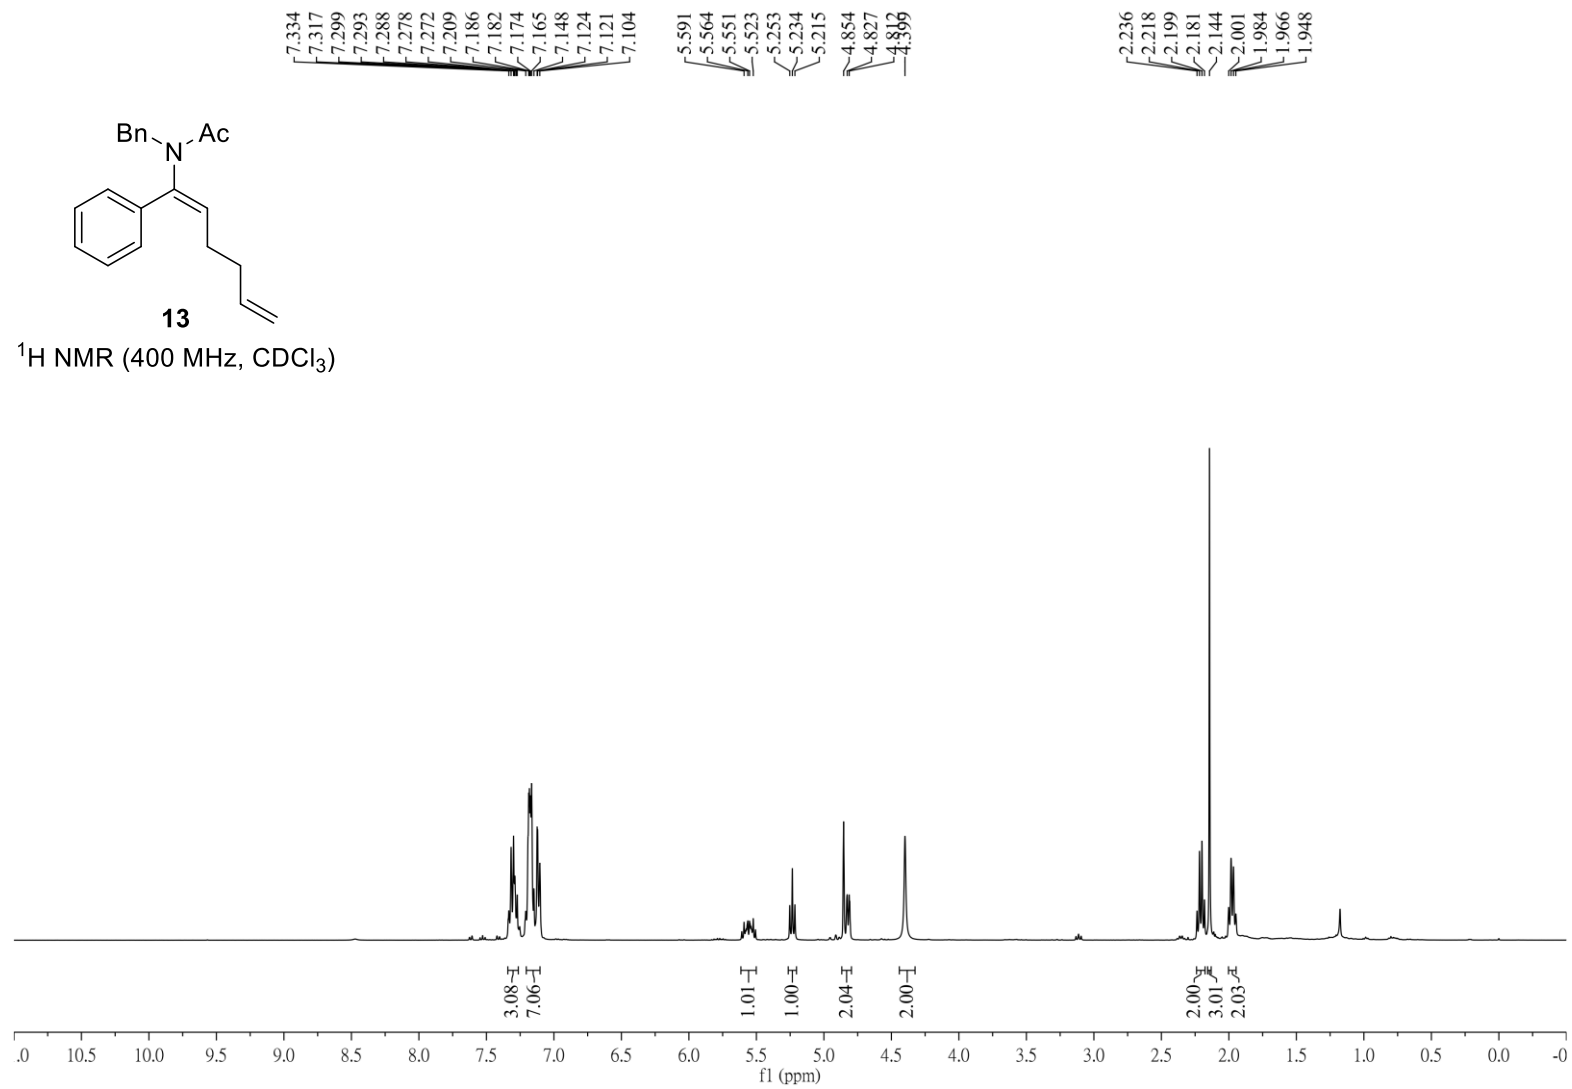

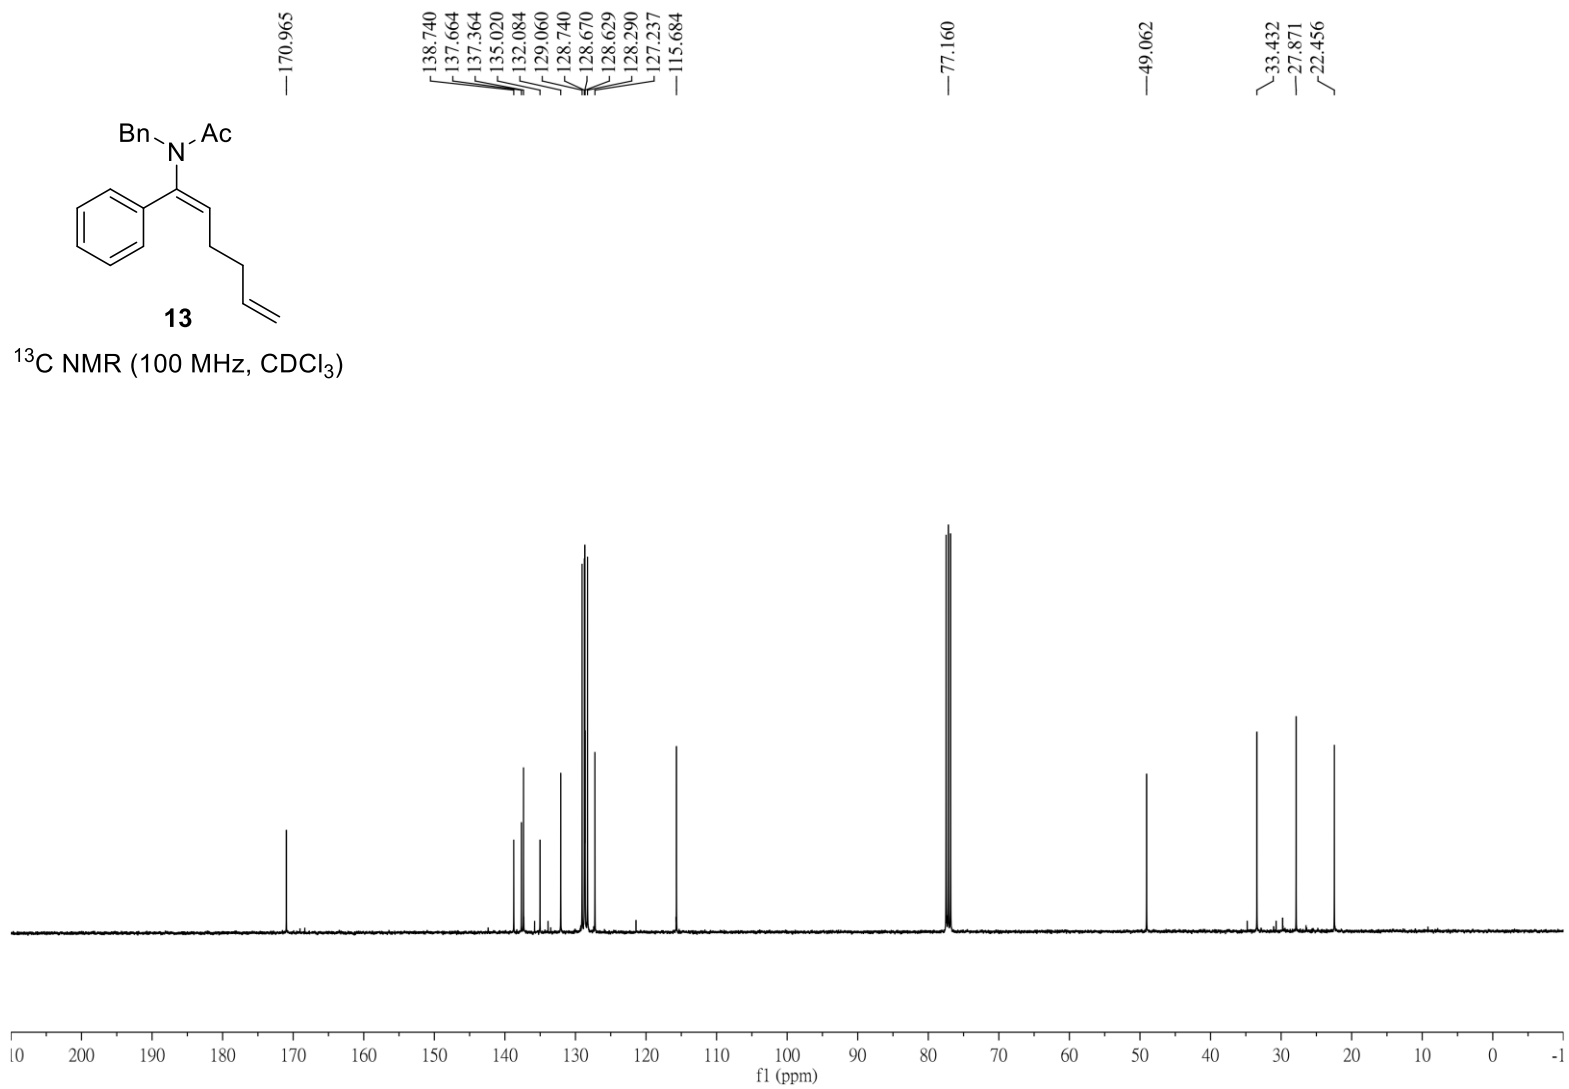

Supplement: c9sc03070k1.pdf [file c9sc03070k1.pdf]
